# Supplementary material for: Inflammation drives alternative first exon usage to regulate immune genes including a novel iron-regulated isoform of Aim2
Source: eLife. 2021 May 28;10:e69431. doi: 10.7554/eLife.69431 (PMC8260223; doi:10.7554/eLife.69431)
Supplement: Figure 4—figure supplement 4—source data 1. [file elife-69431-fig4-figsupp4-data1.pdf]

Aim2 Ab

Actin Ab

WT Clone

Aim2  
KO

0 24 48 72

0 Data not for paper

WT Clone

Aim2  
KO

0 24 48 72

0 Data not for paper

Aim2 Ab

Actin Ab

WT Clone

Aim2  
KO

0 24 48 72

0 Data not for paper

WT Clone

Aim2  
KO

0 24 48 72

0 Data not for paper

Aim2 Ab

Actin Ab

WT Clone

Aim2  
KO

0 24 48 72

0 Data not for paper

WT Clone

Aim2  
KO

0 24 48 72

0 Data not for paper
