# Supplementary material for: Inflammation drives alternative first exon usage to regulate immune genes including a novel iron-regulated isoform of Aim2
Source: eLife. 2021 May 28;10:e69431. doi: 10.7554/eLife.69431 (PMC8260223; doi:10.7554/eLife.69431)

Aim2 Ab

|      | KO |    | WT |   |    |    |    |   |   |    |    |    |
|------|----|----|----|---|----|----|----|---|---|----|----|----|
| FAC: | -  | -  | -  | - | -  | -  | -  | + | + | +  | +  | +  |
| LPS: | 0  | 24 | 0  | 6 | 24 | 48 | 72 | 0 | 6 | 24 | 48 | 72 |

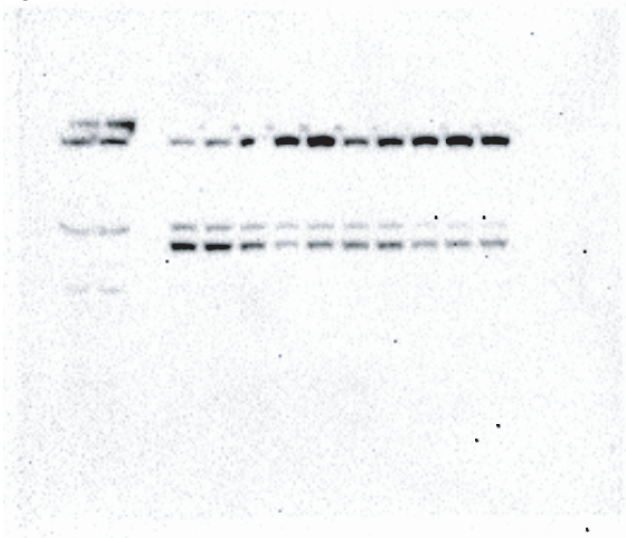

Actin Ab

|      | KO |    | WT |   |    |    |    |   |   |    |    |    |
|------|----|----|----|---|----|----|----|---|---|----|----|----|
| FAC: | -  | -  | -  | - | -  | -  | -  | + | + | +  | +  | +  |
| LPS: | 0  | 24 | 0  | 6 | 24 | 48 | 72 | 0 | 6 | 24 | 48 | 72 |

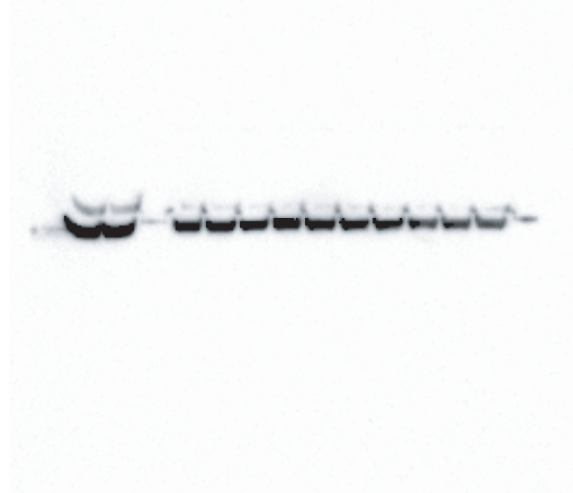

Aim2 Ab

|      | KO |    | WT |   |    |    |    |   |   |    |    |    |
|------|----|----|----|---|----|----|----|---|---|----|----|----|
| FAC: | -  | -  | -  | - | -  | -  | -  | + | + | +  | +  | +  |
| LPS: | 0  | 24 | 0  | 6 | 24 | 48 | 72 | 0 | 6 | 24 | 48 | 72 |

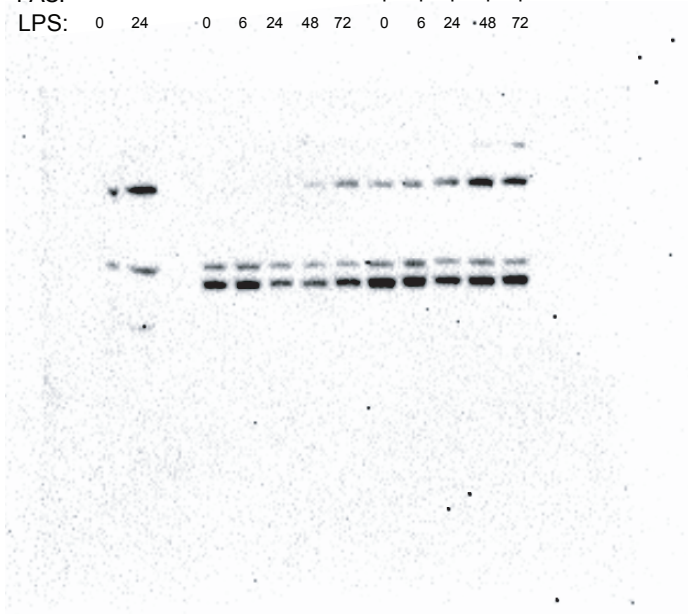

Actin Ab

|      | KO |    | WT |   |    |    |    |   |   |    |    |    |
|------|----|----|----|---|----|----|----|---|---|----|----|----|
| FAC: | -  | -  | -  | - | -  | -  | -  | + | + | +  | +  | +  |
| LPS: | 0  | 24 | 0  | 6 | 24 | 48 | 72 | 0 | 6 | 24 | 48 | 72 |

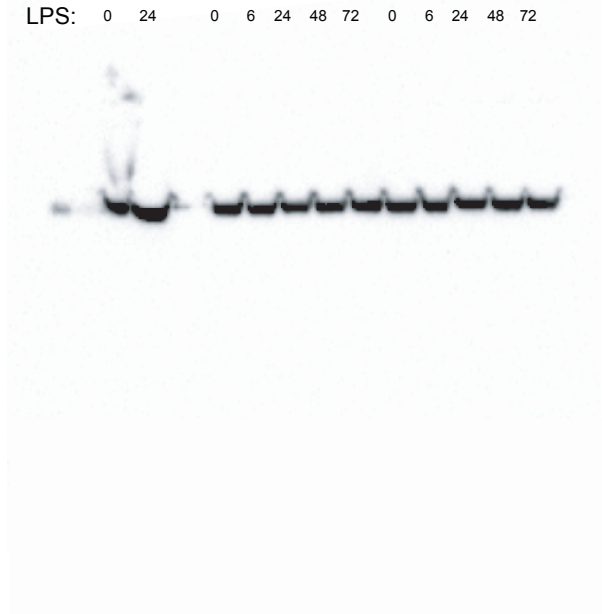

Aim2 Ab

|      | KO |    | WT |   |    |    |    |   |   |    |    |    |
|------|----|----|----|---|----|----|----|---|---|----|----|----|
| FAC: | -  | -  | -  | - | -  | -  | -  | + | + | +  | +  | +  |
| LPS: | 0  | 24 | 0  | 6 | 24 | 48 | 72 | 0 | 6 | 24 | 48 | 72 |

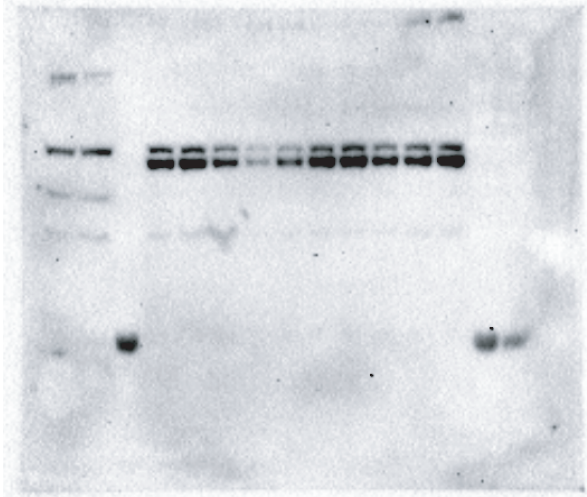

Actin Ab

|      | KO |    | WT |   |    |    |    |   |   |    |    |    |
|------|----|----|----|---|----|----|----|---|---|----|----|----|
| FAC: | -  | -  | -  | - | -  | -  | -  | + | + | +  | +  | +  |
| LPS: | 0  | 24 | 0  | 6 | 24 | 48 | 72 | 0 | 6 | 24 | 48 | 72 |

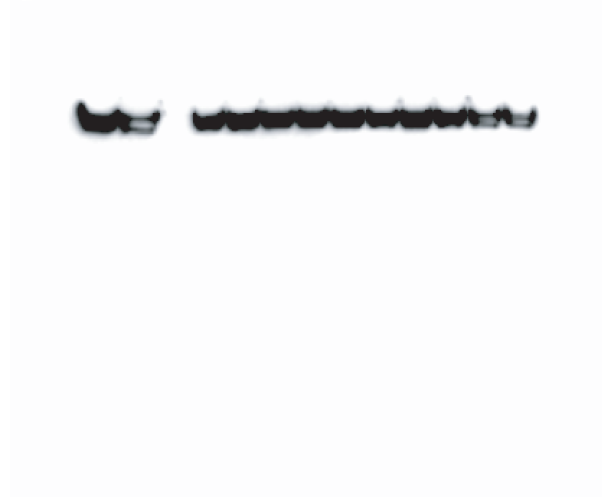

Supplement: Figure 4—source data 1. [file elife-69431-fig4-data1.pdf]
