# Supplementary material for: Inflammation drives alternative first exon usage to regulate immune genes including a novel iron-regulated isoform of Aim2
Source: eLife journal article supplement (doi:10.7554/elife.69431), 2021-05-28
Supplement: supp [file elife-69431-supp-v1.zip]

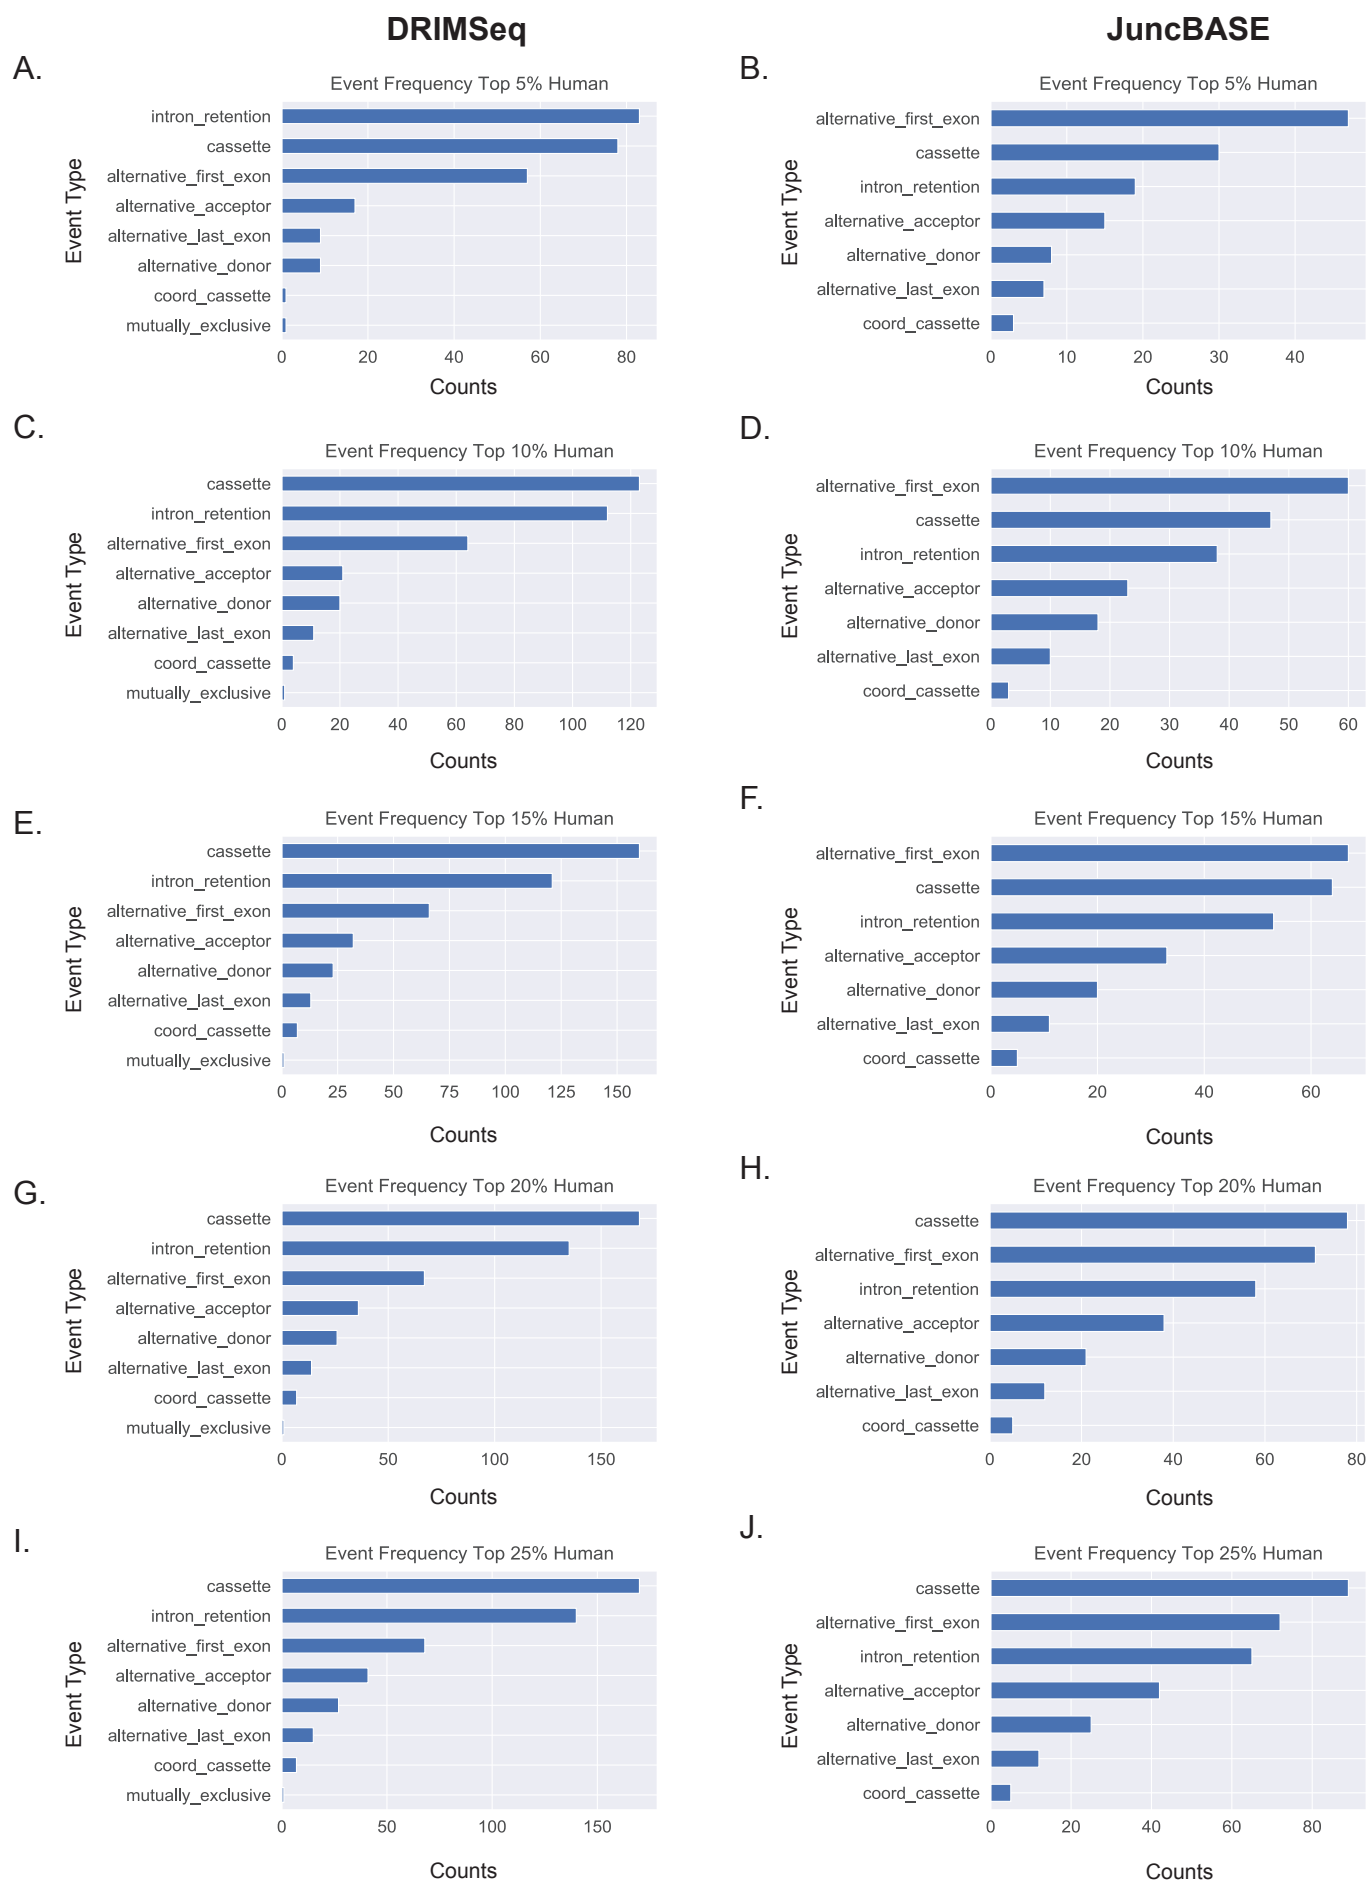

**Figure 1 - Supplemental Figure 2: AFE events remain prevalent amongst ranked alternative splicing events in human macrophages.** (A-B) Ranking of the top 5%, (C-D) 10%, (E-F) 15%, (G-H) 20%, (I-J) 25% of alternative splicing events based on p-value of events as classified by JuncBASE and DRIMSeq in human macrophage cells following LPS stimulation.
