# Supplementary material for: Inflammation drives alternative first exon usage to regulate immune genes including a novel iron-regulated isoform of Aim2
Source: eLife journal article supplement (doi:10.7554/elife.69431), 2021-05-28
Supplement: supp [file elife-69431-supp-v1.zip]

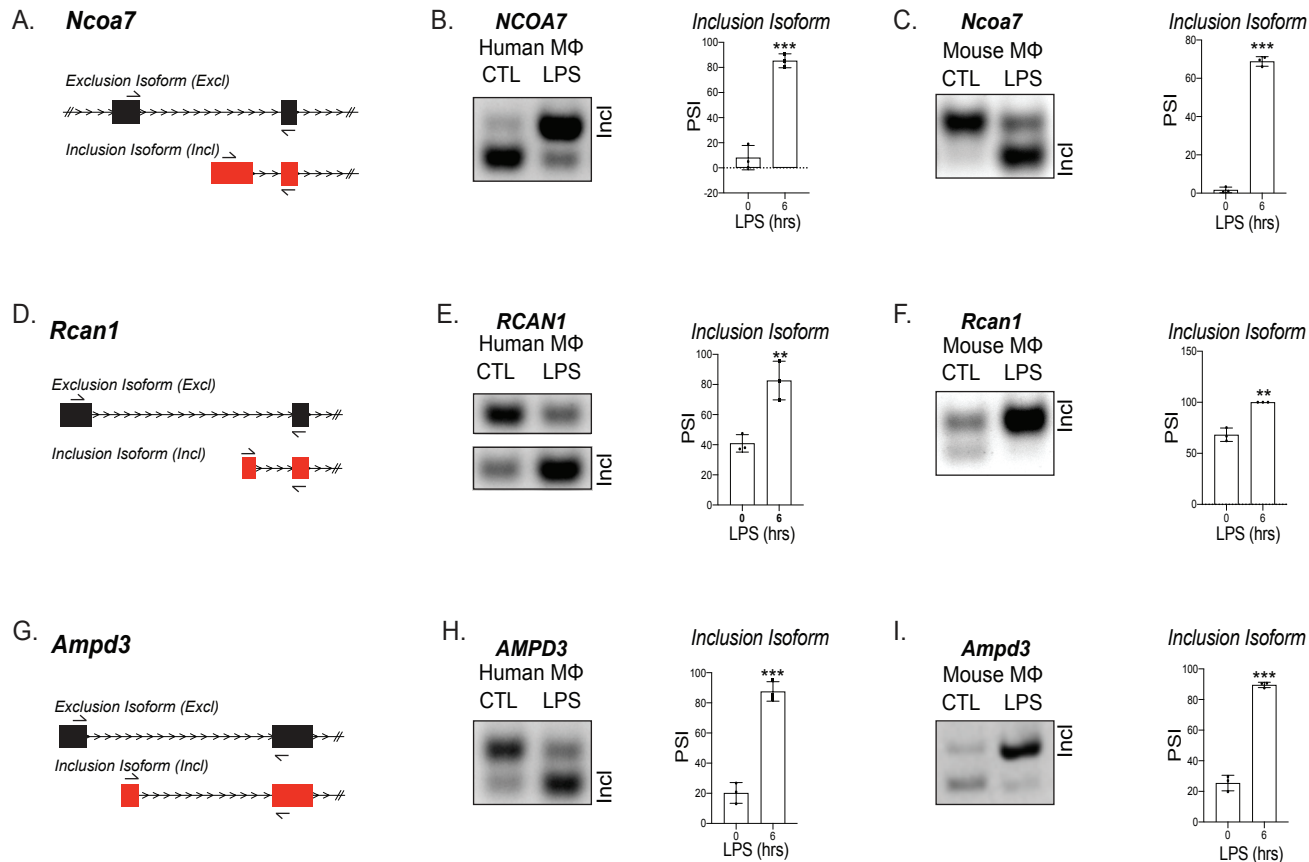

**Figure 1 - Supplemental Figure 6: Validation of mouse and human alternative first exon events.** (A) mRNA transcript diagram of the exclusion and inclusion isoform of *Ncoa7* for mouse and human. RT-PCR of Human (B) and mouse (C), *Rcan1* (D-E) and *Ampd3* (G-I) with PSI calculation.
