# Supplementary material for: Inflammation drives alternative first exon usage to regulate immune genes including a novel iron-regulated isoform of Aim2
Source: eLife journal article supplement (doi:10.7554/elife.69431), 2021-05-28
Supplement: supp [file elife-69431-supp-v1.zip]

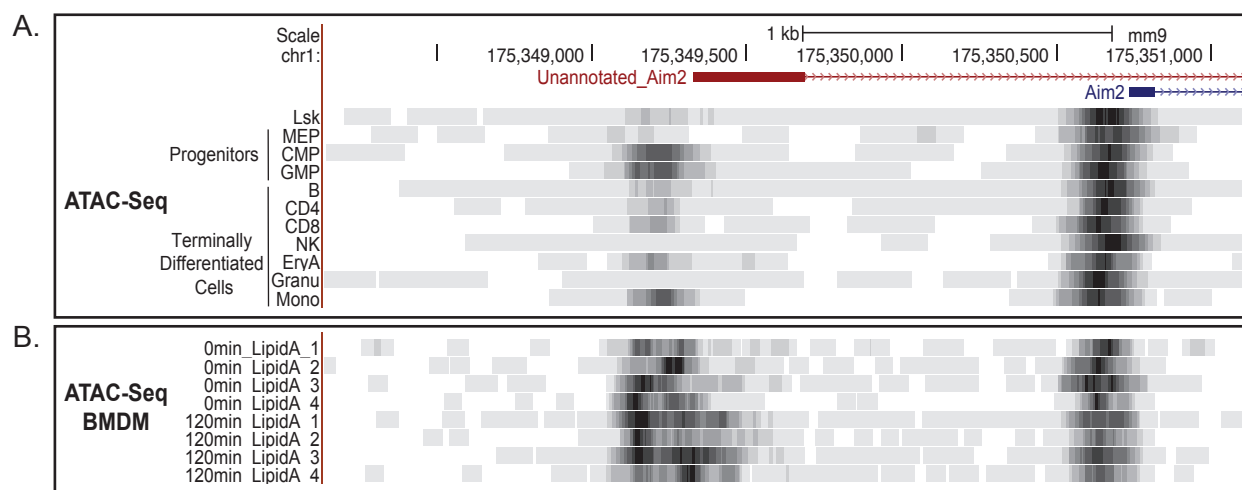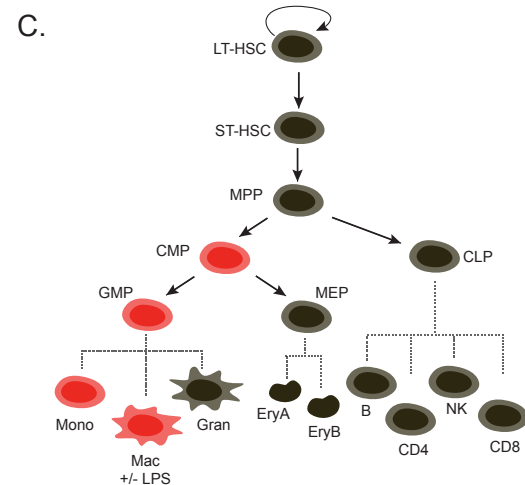

**Figure 3 - Supplemental Figure 10: Chromatin remodeling not a mechanism driving novel Aim2 isoform.** (A) mm9 genome browser shot between chr1:175,348,283-175,351,422 indicating ATAC-seq of cells from hematopoietic tree. (B) mm9 genome browser shot between chr1:175,348,283-175,351,422 indicating ATAC-seq of BMDMs +/- Lipid A for 2 hrs. (C) Schematic summarizing promoter accessibility of novel Aim2 isoform, red=accessible and black=not accessible.
