# Supplementary material for: Inflammation drives alternative first exon usage to regulate immune genes including a novel iron-regulated isoform of Aim2
Source: eLife journal article supplement (doi:10.7554/elife.69431), 2021-05-28
Supplement: supp [file elife-69431-supp-v1.zip]

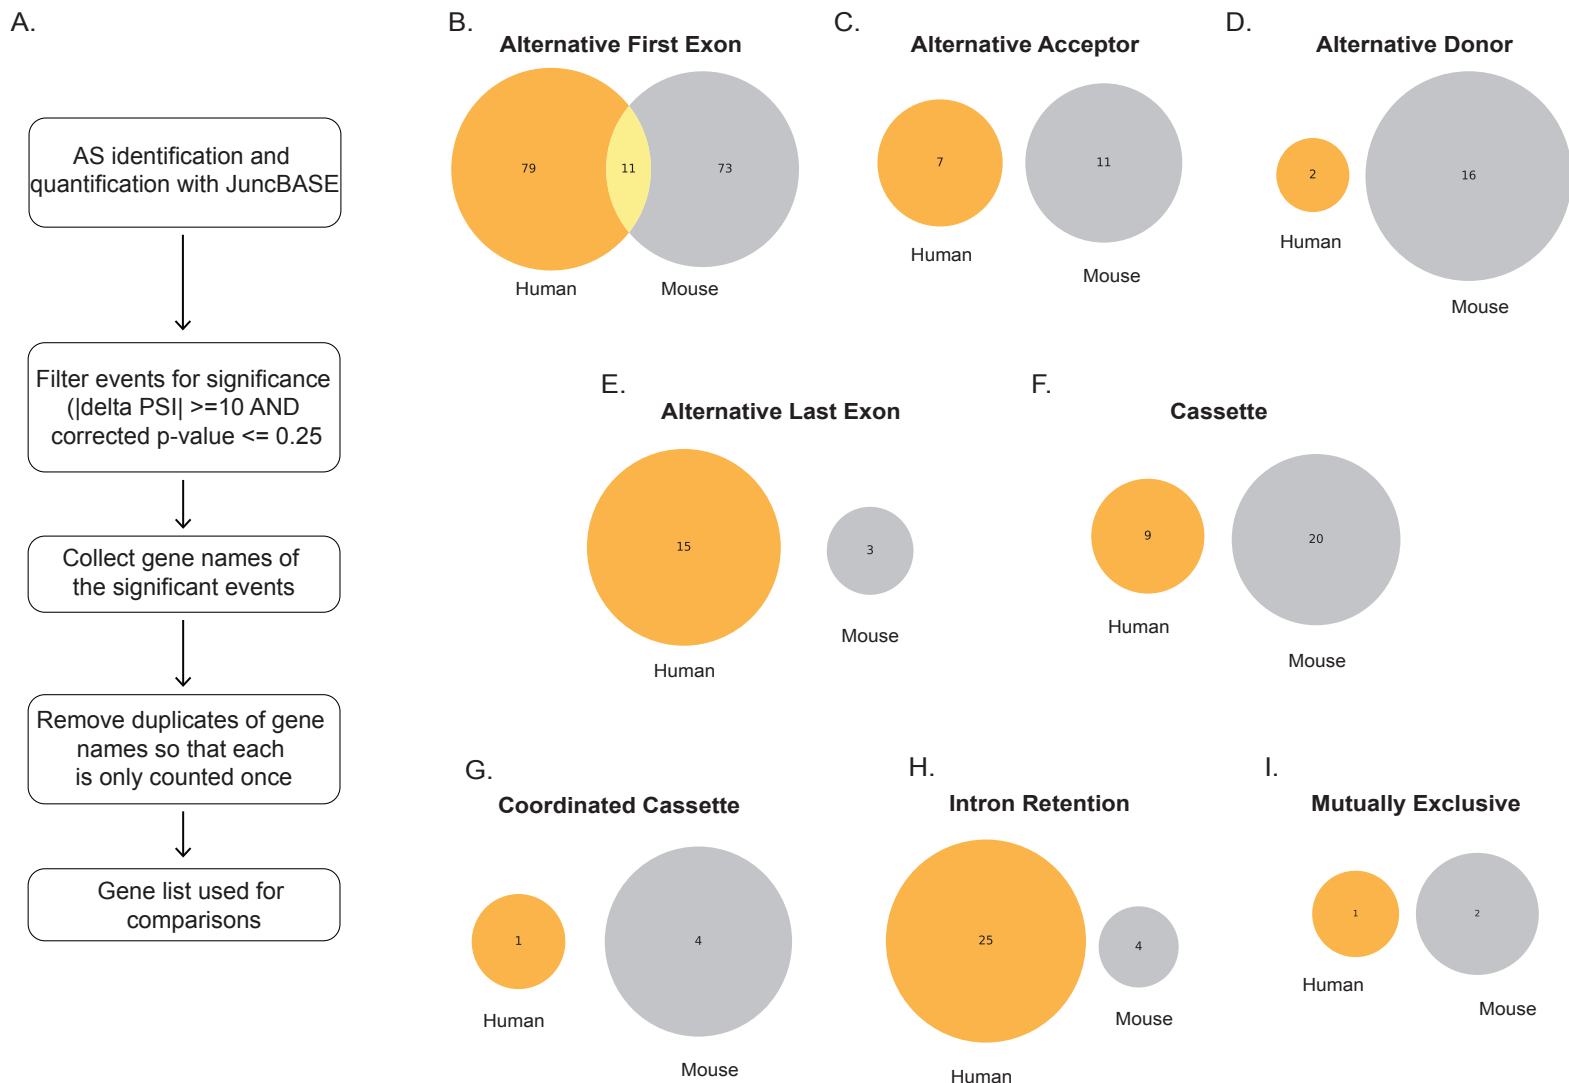

**Figure 1 - Supplemental Figure 5: Conserved Genes identified through alternative splicing events between human and mouse using gencode transcriptome.** (A) Schematic depicting how gene lists were generated from exon events. Venn digrams denoting unique and overlapping genes with significant splicing events in human (orange) and mouse (grey) for (B) Alternative First Exon, (C) Alternative Acceptor, (D) Alternative Donor, (E) Alternative Last Exon, (F) Casette, (G) Coordinated Casette, (H) Intron Retention and (I) Mutually Exclusive all have conserved splicing events when analyzing LPS stimulated primary macrophage.
