# Supplementary material for: Inflammation drives alternative first exon usage to regulate immune genes including a novel iron-regulated isoform of Aim2
Source: eLife journal article supplement (doi:10.7554/elife.69431), 2021-05-28
Supplement: supp [file elife-69431-supp-v1.zip]

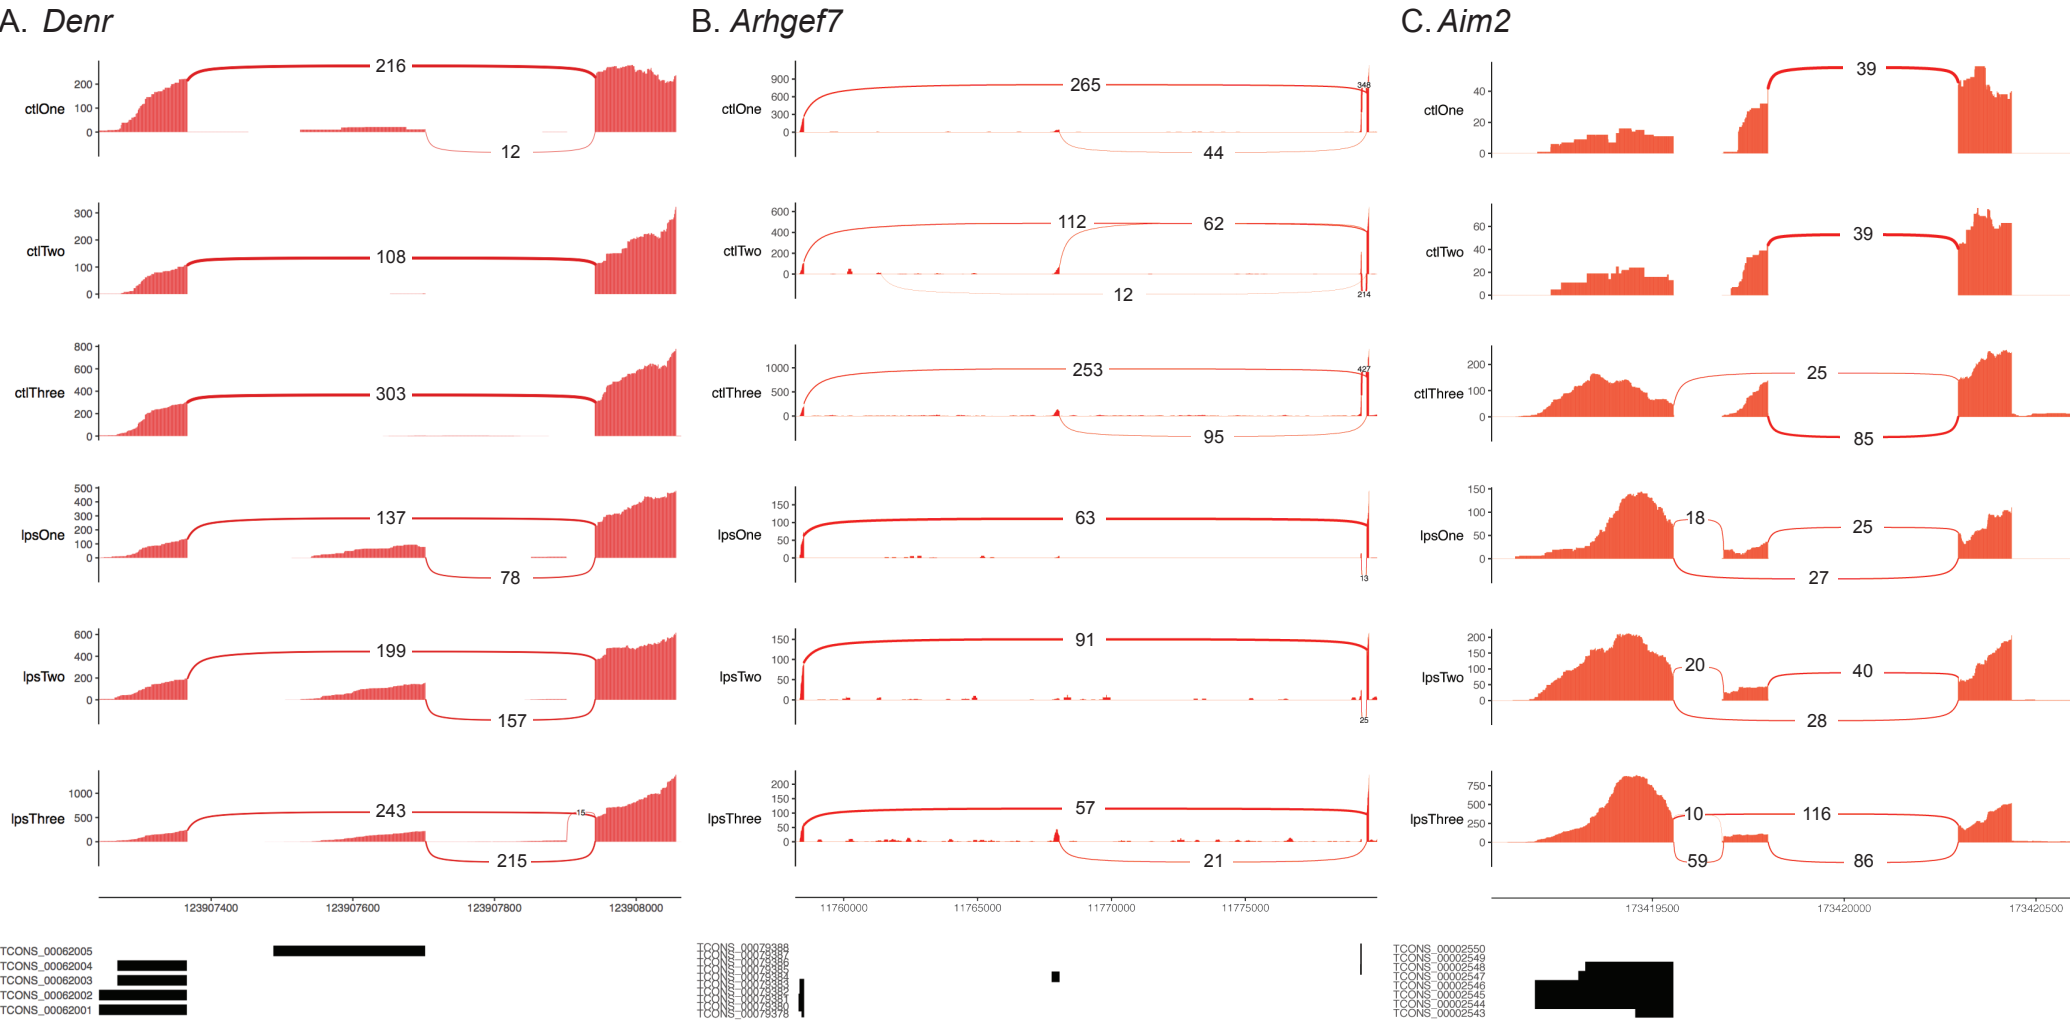

**Figure 1 - Supplemental Figure 9: Validated unannotated alternative first exon isoforms.** Sashimi plots showing AFE usage in (A) *Denr*, (B) *Arhgef7*, and (C) *Aim2* involving novel isoforms identified using nanopore sequencing.
