# Supplementary material for: Inflammation drives alternative first exon usage to regulate immune genes including a novel iron-regulated isoform of Aim2
Source: eLife journal article supplement (doi:10.7554/elife.69431), 2021-05-28
Supplement: supp [file elife-69431-supp-v1.zip]

Mouse IRE sequence  
Vienna RNAFold

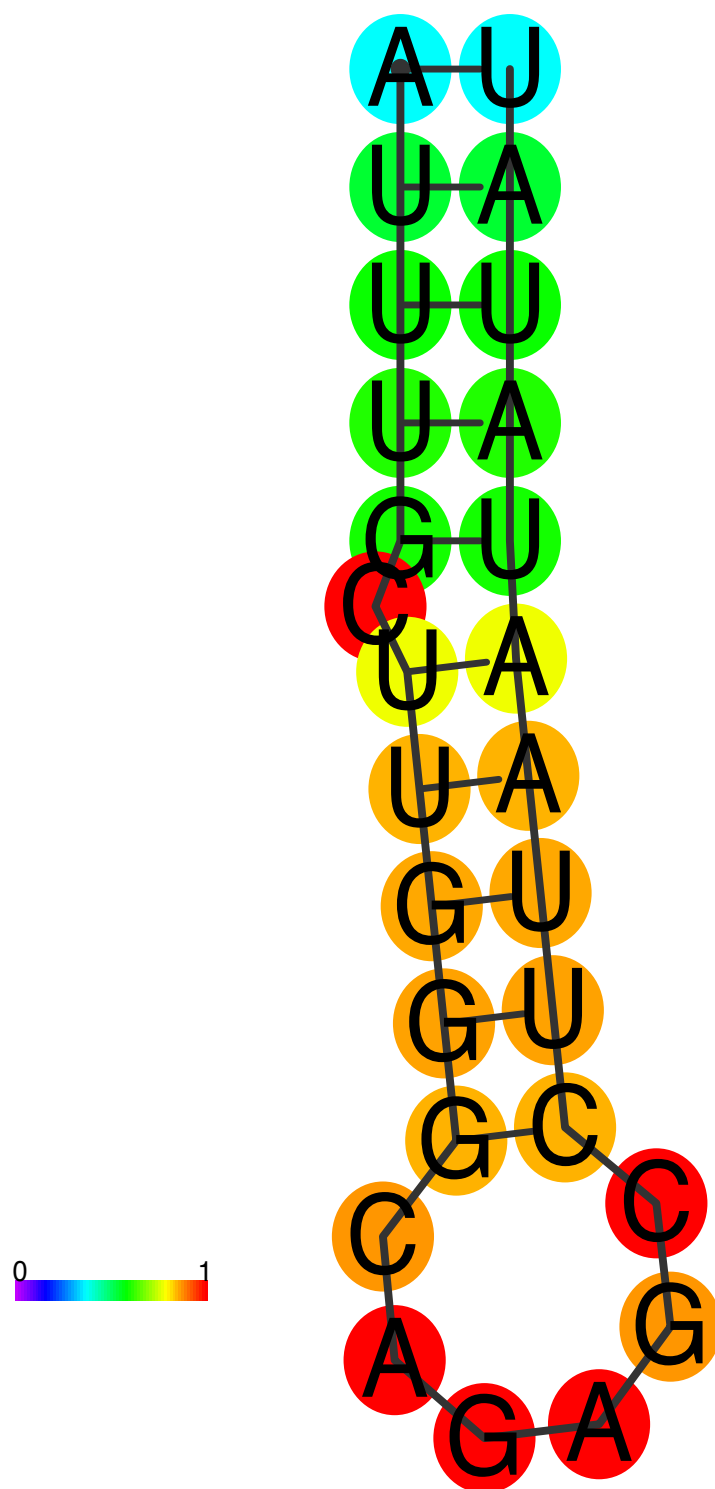

**Figure 4 - Supplemental Figure 13: Aim2 IRE hairpin structure predicted.** Using the Vienna RNAFold package, the IRE motif is folded into a hairpin, with strong base-pairing.
