# Supplementary material for: Inflammation drives alternative first exon usage to regulate immune genes including a novel iron-regulated isoform of Aim2
Source: eLife journal article supplement (doi:10.7554/elife.69431), 2021-05-28
Supplement: supp [file elife-69431-supp-v1.zip]

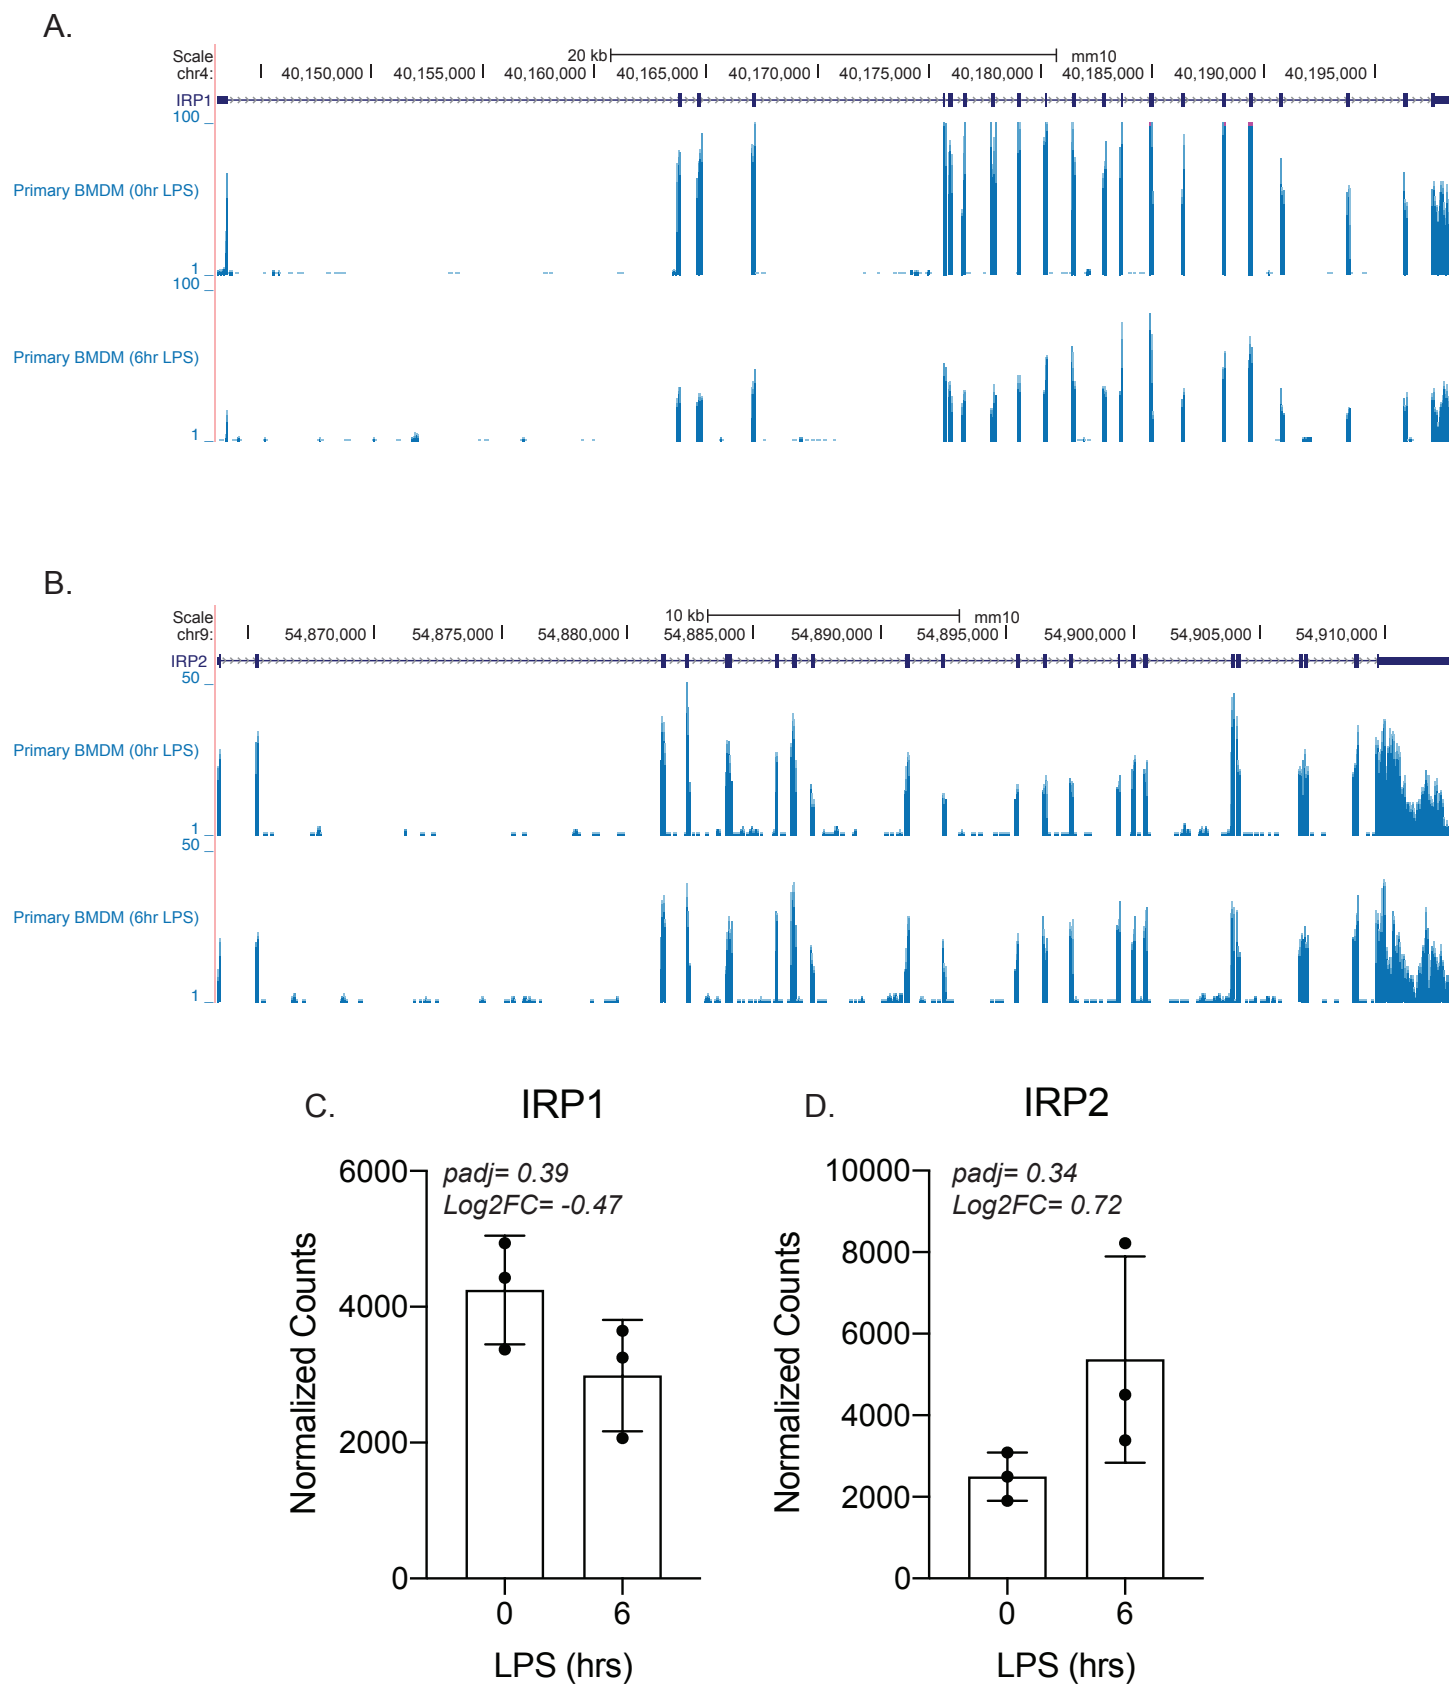

**Figure 4 - Supplemental Figure 14: IRP1 and IRP2 are not differentially expressed by LPS in bone marrow derived macrophages.** Genome browser tracks showing the transcript of either (A) IRP1 or (B) IRP2, followed by two RNA-sequencing tracks from primary BMDMs +/- LPS for 6hrs. The normalized counts and DESeq2 analysis of IRP1 (C) and IRP2 (D) are represented in a bar graph in triplicate.
