# Supplementary material for: Inflammation drives alternative first exon usage to regulate immune genes including a novel iron-regulated isoform of Aim2
Source: eLife journal article supplement (doi:10.7554/elife.69431), 2021-05-28
Supplement: supp [file elife-69431-supp-v1.zip]

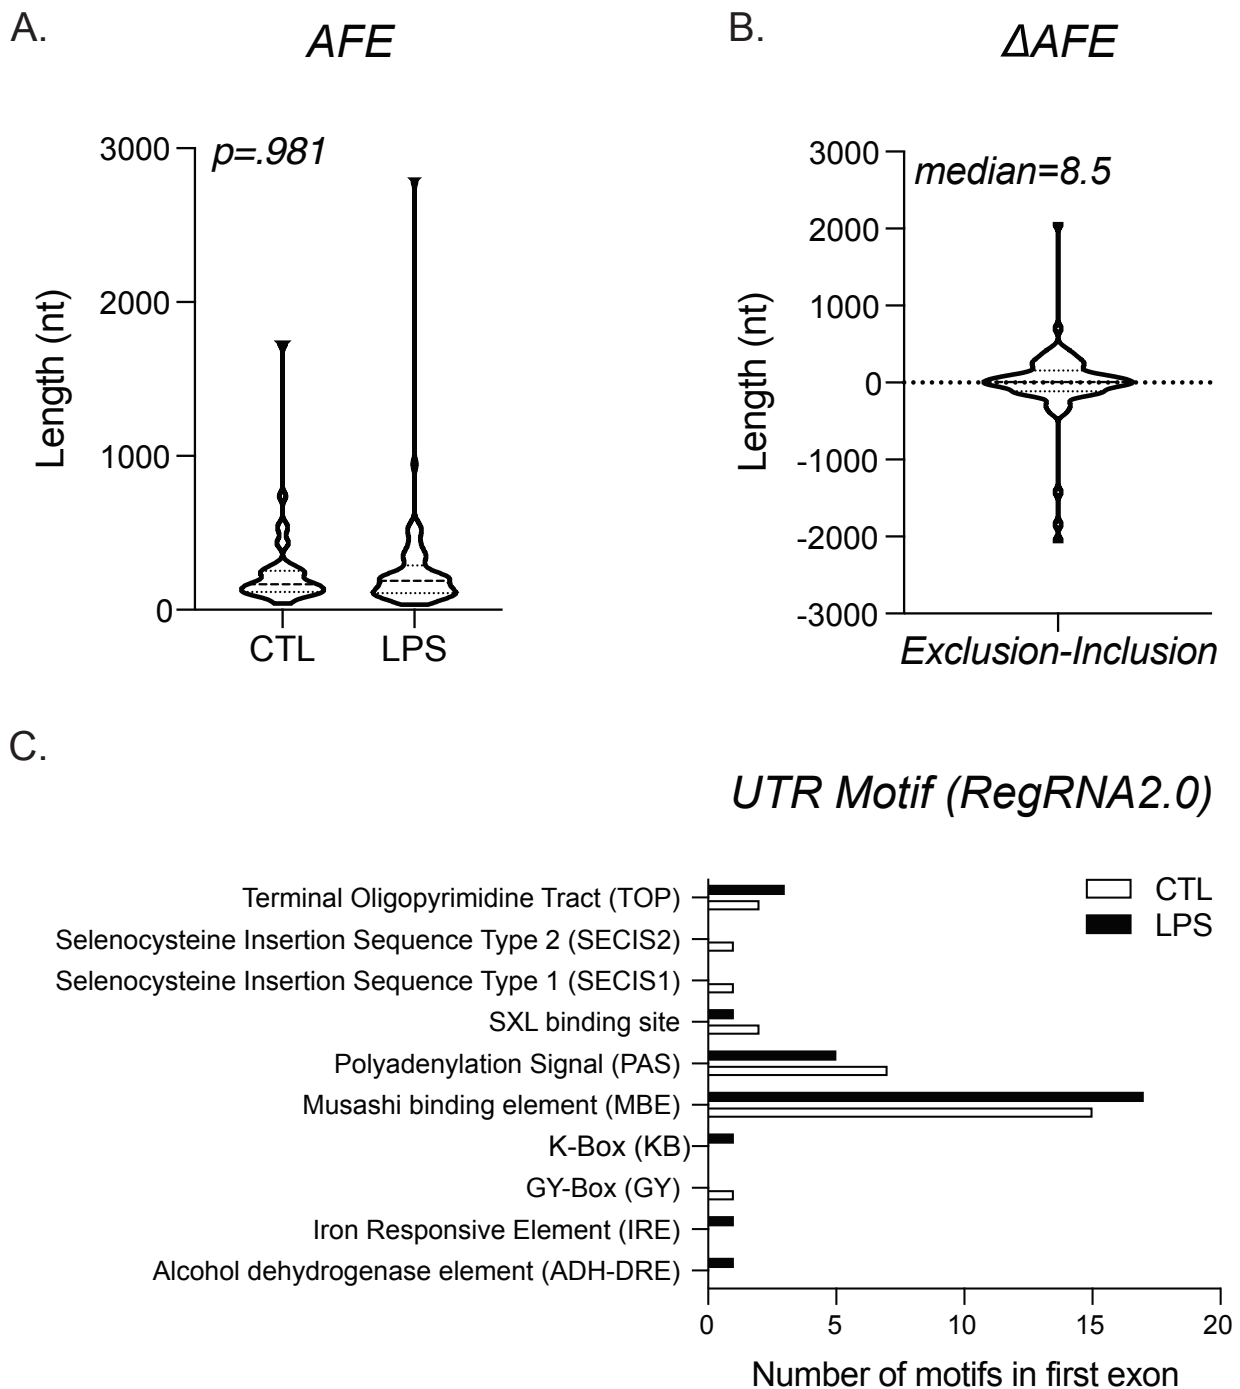

**Figure 4 - Supplemental Figure 12: Global characterization of AFE.** (A) Length distribution of first exon from exclusion (CTL) exon and inclusion (LPS) exon. (B) Graph of the length difference between the exclusion and inclusion exons, also known as  $\Delta AFE$ . (C) All potential UTR motifs were identified using RegRNA2.0 for either the exclusion (CTL) or inclusion (LPS) specific first exons.
