# Supplementary material for: Inflammation drives alternative first exon usage to regulate immune genes including a novel iron-regulated isoform of Aim2
Source: eLife journal article supplement (doi:10.7554/elife.69431), 2021-05-28
Supplement: supp [file elife-69431-supp-v1.zip]

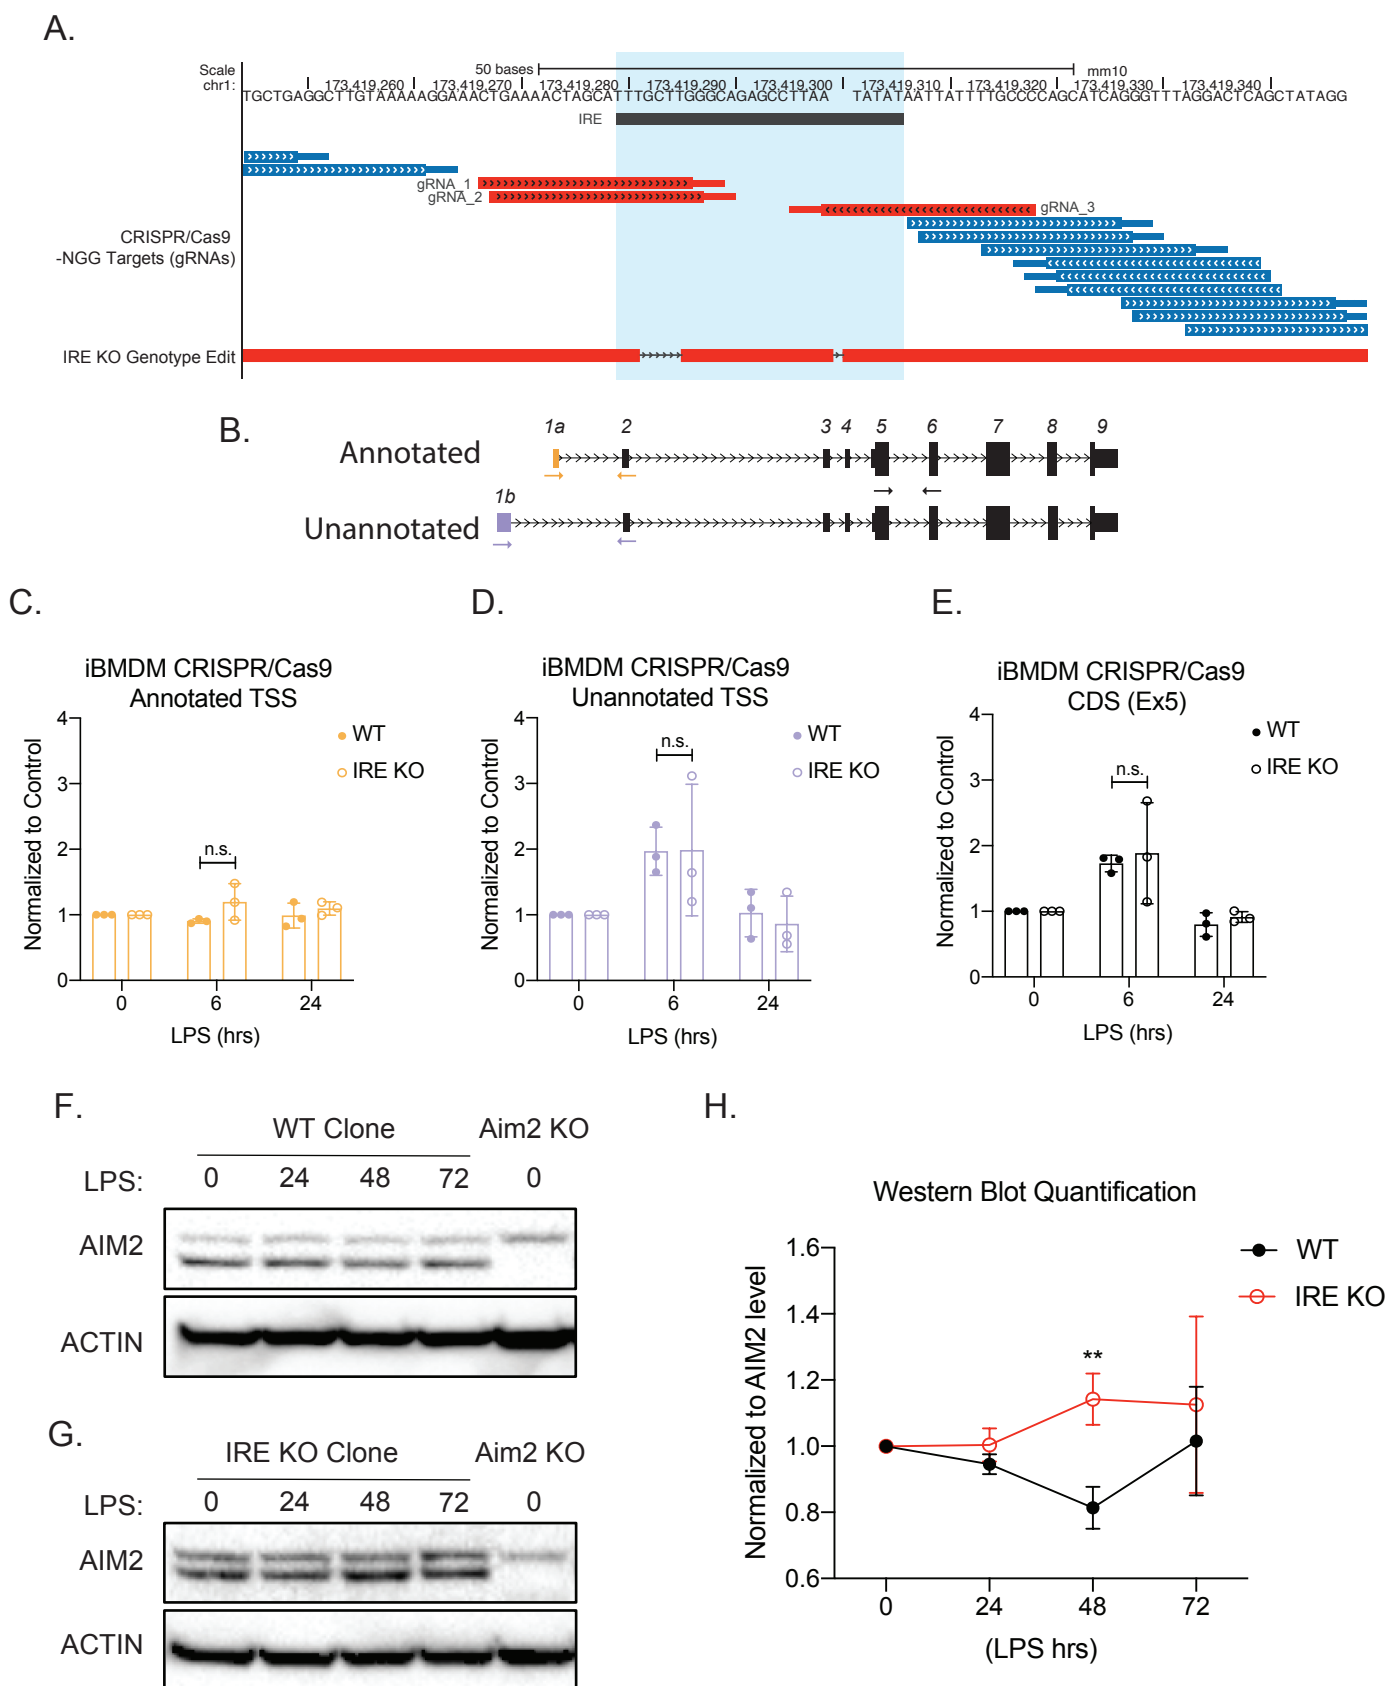

**Figure 5 - Supplemental Figure 15: CRISPR/Cas9 knock-out of IRE in Aim2 5'UTR leads to an increase of protein expression in mouse macrophages during inflammation.** (A) Genome browser shot. Top track indicates chromosome position. Second track shows the location of the Aim2 IRE, highlighted in light blue. The third track shows all the possible gRNAs found using the CRISPR/Cas9 -NGG Target track and the chosen gRNAs indicated in red. The last track shows the specific edits in the IRE KO BMDM clonal cell line using the BLAT tool. (C-E) qRT-PCR was performed in biological triplicate, on WT or IRE KO immortalized CRISPR/Cas9 BMDM RNA extracts that had been stimulated with LPS for indicated time points. (F) WT or (G) IRE KO Protein lysates of time course LPS stimulation of 0hr, 24hr, 48hr and 72hr. Western blot performed on AIM2 and B-ACTIN. (H) Western blot quantification performed in FIJI, standard deviation represents biological triplicates, p-value assessed using student's t-test.
