# Supplementary material for: Inflammation drives alternative first exon usage to regulate immune genes including a novel iron-regulated isoform of Aim2
Source: eLife journal article supplement (doi:10.7554/elife.69431), 2021-05-28
Supplement: supp [file elife-69431-supp-v1.zip]

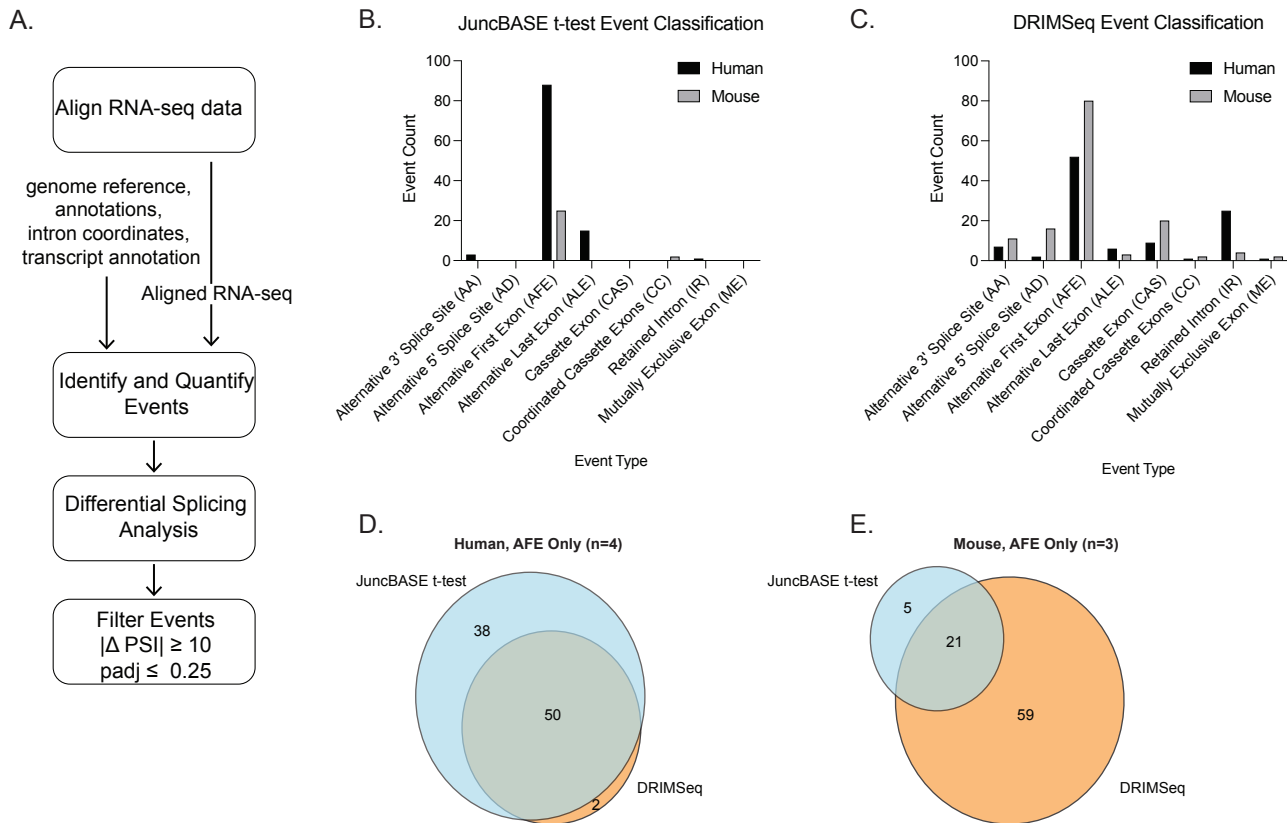

**Figure 1 - Supplemental Figure 1: Computational Pipeline and comparison of t-test and DRIMSeq alternative splicing events.** (A) Bioinformatic pipeline for Human and Mouse RNA-seq data. Alternative splicing event type classification of significant differential splicing events ( $|\Delta\text{PSI}| \geq 10$  and corrected p-value  $\leq 0.25$ ) in Human and Mouse macrophages +/- LPS as identified and quantified using the (B) t-test with JuncBASE or (C) the Dirichlet-multinomial framework applied by DRIMSeq. Venn Diagrams representing the unique and overlapping AFE events from (D) Human or (E) Mouse macrophage alternative splicing analysis.
