# Supplementary material for: Inflammation drives alternative first exon usage to regulate immune genes including a novel iron-regulated isoform of Aim2
Source: eLife journal article supplement (doi:10.7554/elife.69431), 2021-05-28
Supplement: supp [file elife-69431-supp-v1.zip]

## Sheet: AS_excl_incl_counts_lenNorm
Human Illumina
#Contains_Novel_or_Only_Known(Annotated)_Junctions	as_event_type	gene_name	chr	strand	exclusion_junctions	inclusion_junctions	exclusion_exons	inclusion_exons	intron-exon_junctions	neighboring_constitutive_exons	accepted_hits_6	accepted_hits_8	accepted_hits_20	accepted_hits_22	accepted_hits_34	accepted_hits_36	accepted_hits_48	accepted_hits_50
K	cassette	IKBKG	chrX	+	chrX:153786866-153789902	chrX:153786866-153788621;chrX:153788775-153789902		chrX:153788622-153788774			0;18	0;16	2;27	0;35	0;31	0;28	0;40	3;41
N	cassette	AF011889.5,IDS	chrX	-	chrX:148564750-148571844	chrX:148564750-148568455;chrX:148568630-148571844		chrX:148568456-148568629			0;55	0;61	0;79	0;87	0;55	0;96	3;52	0;113
K	intron_retention	THOC2	chrX	-	chrX:122757561-122757637				chrX:122757560-122757561;chrX:122757637-122757638		0;2	0;0	0;2	0;0	5;2	0;0	0;0	0;2
K	jcn_only_AD	IQSEC2	chrX	-	chrX:53285244-53321076	chrX:53285244-53308745					0;0	0;0	2;0	0;5	0;0	0;2	0;0	0;0
K	intron_retention	RPL10	chrX	+	chrX:153628283-153629042				chrX:153628282-153628283;chrX:153629042-153629043		5;7	8;13	13;14	10;23	6;16	6;9	0;19	8;10
K	jcn_only_AA	RAP2C	chrX	-	chrX:131352370-131353397;chrX:131352362-131353397	chrX:131351835-131353397					0;0	3;0	2;2	13;0	0;0	7;0	2;0	8;0
K	intron_retention	WDR13	chrX	+	chrX:48456426-48457104				chrX:48456425-48456426;chrX:48457104-48457105		5;0	6;0	24;2	13;0	34;3	17;2	22;2	19;0
K	jcn_only_AA	TIMM8A	chrX	-	chrX:100601649-100603520	chrX:100603390-100603520		chrX:100601649-100603389	chrX:100601648-100601649		0;0	0;0	19;3	0;0	18;0	2;0	13;0	0;0
K	alternative_last_exon	CA5BP1,OGT	chrX	+	chrX:15711182-15720904	chrX:15711182-15715362	chrX:15720905-15721847	chrX:15715363-15715874			7;6	2;3	8;10	3;3	10;10	3;3	13;11	3;4
K	intron_retention	GLA	chrX	-	chrX:100655746-100656220				chrX:100655745-100655746;chrX:100656220-100656221		0;5	0;6	0;13	2;10	0;12	0;9	0;13	0;11
K	alternative_first_exon	PNPLA4,PSMD10	chrX	-	chrX:7894174-7895726	chrX:7894174-7895326	chrX:7895727-7895780	chrX:7895327-7895484			0;0	0;0	0;7	0;0	0;11	0;2	1;10	0;2
N	cassette	TAB3	chrX	-	chrX:30885336-30889815	chrX:30885336-30885581;chrX:30885667-30889815		chrX:30885582-30885666			0;6	0;4	0;9	0;16	0;8	0;6	0;6	2;18
K	alternative_acceptor	FMR1	chrX	+	chrX:147024847-147026388;chrX:147024847-147026463	chrX:147024847-147026424		chrX:147026389-147026424;chrX:147026425-147026463	chrX:147026424-147026425;chrX:147026463-147026464		6;0	7;0	8;1	31;1	14;3	18;2	12;0	21;0
N	jcn_only_AD	OCRL	chrX	+	chrX:128682579-128691301	chrX:128688424-128691301		chrX:128682579-128688423	chrX:128682578-128682579		2;0	7;0	9;0	14;0	11;6	2;0	9;0	10;0
K	alternative_acceptor	TIMM8A	chrX	-	chrX:100601649-100603520	chrX:100603390-100603520		chrX:100601649-100603389	chrX:100601648-100601649		0;1	0;0	19;1	0;0	18;1	2;0	13;2	0;0
K	cassette	ALG13	chrX	+	chrX:110928332-110931114	chrX:110928332-110929364;chrX:110929403-110931114		chrX:110929365-110929402			6;0	6;0	11;0	13;1	13;2	7;0	22;2	17;0
K	intron_retention	DDX3X	chrX	+	chrX:41196719-41198288				chrX:41196718-41196719;chrX:41198288-41198289		108;0	106;2	136;2	247;7	168;0	178;3	191;0	232;7
N	jcn_only_AD	APOO	chrX	-	chrX:23899070-23925810;chrX:23899070-23901620	chrX:23899070-23901475		chrX:23901476-23901620;chrX:23901621-23925810	chrX:23901620-23901621;chrX:23925810-23925811		2;0	2;0	7;0	2;18	10;0	3;17	10;0	3;0
K	alternative_donor	HCCS	chrX	+	chrX:11129581-11130138	chrX:11129639-11130138		chrX:11129581-11129638	chrX:11129580-11129581		0;7	0;3	0;15	0;8	2;15	0;6	0;17	0;8
K	cassette	FAM122B	chrX	-	chrX:133923297-133927844	chrX:133923297-133923609;chrX:133923667-133927844		chrX:133923610-133923666			3;3	3;0	8;5	6;6	19;4	8;3	15;5	6;5
N	jcn_only_AA	SH3BGRL	chrX	+	chrX:80458076-80532482	chrX:80458076-80492616		chrX:80492617-80532482	chrX:80532482-80532483		33;0	0;0	30;0	0;0	41;0	0;0	55;0	27;5
K	jcn_only_AD	SLC25A14	chrX	+	chrX:129483320-129484619	chrX:129483842-129484619					0;0	2;0	0;0	0;0	0;2	0;0	2;0	0;0
K	cassette	KDM6A	chrX	+	chrX:44920665-44922666	chrX:44920665-44921891;chrX:44921994-44922666		chrX:44921892-44921993			0;4	0;5	0;5	0;11	7;5	10;7	0;6	15;11
K	cassette	GRIPAP1	chrX	-	chrX:48838104-48839390	chrX:48838104-48838206;chrX:48838285-48839390		chrX:48838207-48838284			0;14	0;19	0;23	0;42	0;20	0;39	3;19	8;50
K	alternative_last_exon	2019-09-06	chrX	-	chrX:118752750-118763280	chrX:118759343-118763280	chrX:118751602-118752749	chrX:118759298-118759342			7;7	3;0	11;10	3;5	8;13	4;8	7;8	5;11
K	alternative_donor	MBNL3	chrX	-	chrX:131540421-131622878	chrX:131540421-131573462		chrX:131573463-131622878	chrX:131622878-131622879		2;0	0;0	2;0	0;0	0;0	0;0	0;0	0;0
K	jcn_only_AD	OTUD5	chrX	-	chrX:48791886-48791983	chrX:48791886-48791968		chrX:48791969-48791983	chrX:48791983-48791984		18;0	20;2	18;0	30;0	43;3	42;0	24;2	56;0
K	alternative_first_exon	RBBP7	chrX	-	chrX:16887344-16888160	chrX:16887344-16887616	chrX:16888161-16888537	chrX:16887617-16888009			20;0	13;1	44;3	17;0	76;1	17;1	81;1	23;2
N	alternative_donor	ATP7A	chrX	+	chrX:77166333-77227117	chrX:77218312-77227117		chrX:77166333-77218311	chrX:77166332-77166333		3;0	0;0	6;0	0;0	10;0	2;0	9;0	0;0
K	cassette	GEMIN8	chrX	-	chrX:14039631-14047895	chrX:14039631-14044258;chrX:14044341-14047895		chrX:14044259-14044340			0;3	0;2	0;2	0;3	2;6	0;1	0;3	0;4
K	cassette	ZNF185	chrX	+	chrX:152090801-152100215;chrX:152091354-152100215	chrX:152090801-152097118,chrX:152091354-152097118;chrX:152097206-152100215		chrX:152097119-152097205			3;4	0;0	8;7	3;0	6;8	0;5	19;15	6;6
N	jcn_only_AD	MSN	chrX	+	chrX:64921504-64936679;chrX:64923554-64936679	chrX:64887721-64936679		chrX:64887721-64921503;chrX:64921504-64923553	chrX:64887720-64887721;chrX:64921503-64921504		0;338	0;232	0;623	0;715	9;778	0;599	2;822	13;708
K	cassette	NONO	chrX	+	chrX:70503572-70510478	chrX:70503572-70504246;chrX:70504304-70510478		chrX:70504247-70504303			2;40	2;34	9;68	2;49	10;106	5;55	8;106	3;66
K	alternative_donor	USP9X	chrX	+	chrX:41089033-41089753	chrX:41089081-41089753		chrX:41089033-41089080	chrX:41089032-41089033		25;1	40;4	77;0	32;1	51;2	32;2	44;1	47;2
K	alternative_acceptor	TFE3	chrX	-	chrX:48896871-48897981	chrX:48896936-48897981		chrX:48896871-48896935	chrX:48896870-48896871		0;18	0;22	32;38	27;41	19;44	0;42	20;49	39;47
N	jcn_only_AD	SLC9A6	chrX	+	chrX:135065949-135067761	chrX:135067637-135067761		chrX:135065949-135067636	chrX:135065948-135065949		0;0	0;0	0;0	0;0	0;2	0;0	2;0	0;6
K	alternative_acceptor	IRAK1	chrX	-	chrX:153278795-153279492	chrX:153278885-153279492		chrX:153278795-153278884	chrX:153278794-153278795		9;41	0;14	9;88	17;69	23;98	6;33	16;93	9;55
K	cassette	TCEAL8	chrX	-	chrX:102508946-102510005	chrX:102508946-102509532;chrX:102509606-102510005		chrX:102509533-102509605			0;9	0;13	2;21	2;27	2;37	2;19	0;34	3;24
K	intron_retention	IDS	chrX	-	chrX:148583708-148584841				chrX:148583707-148583708;chrX:148584841-148584842		0;0	0;0	0;2	13;4	2;0	0;5	0;3	0;0
K	intron_retention	FLNA	chrX	-	chrX:153583441-153585618				chrX:153583440-153583441;chrX:153585618-153585619		51;0	9;0	130;0	116;5	123;4	63;0	102;0	51;0
K	intron_retention	UBE2A	chrX	+	chrX:118709364-118716550				chrX:118709363-118709364;chrX:118716550-118716551		1;0	0;0	5;0	5;2	0;4	1;0	6;2	6;2
N	intron_retention		chrX	-	chrX:5642329-5643970				chrX:5642328-5642329;chrX:5643970-5643971		0;0	0;0	9;2	0;0	0;2	0;0	5;0	0;0
K	alternative_donor	PRPS2	chrX	+	chrX:12817510-12827352	chrX:12817519-12827352		chrX:12817510-12817518	chrX:12817509-12817510		7;0	10;0	23;1	7;0	32;5	13;0	43;1	5;0
K	intron_retention	FAM122C	chrX	+	chrX:133941372-133941569				chrX:133941371-133941372;chrX:133941569-133941570		0;0	0;0	0;0	5;3	0;0	9;0	0;2	0;3
N	alternative_donor	STS	chrX	+	chrX:7109050-7171236	chrX:7137728-7171236		chrX:7109050-7137727	chrX:7109049-7109050		0;0	0;0	0;0	0;0	9;0	0;0	0;0	0;0
K	cassette	ARMCX5,ARMCX5-GPRASP2	chrX	+	chrX:101854776-101856391	chrX:101854776-101855847;chrX:101855961-101856391		chrX:101855848-101855960			0;3	0;1	0;2	0;1	3;6	0;1	3;5	0;2
K	cassette	FAM3A	chrX	-	chrX:153735822-153736619	chrX:153735822-153736141;chrX:153736193-153736619		chrX:153736142-153736192			2;6	0;1	0;9	0;2	0;13	0;6	0;17	0;7
K	jcn_only_AA	WAS,ZFX	chrX	+	chrX:24190918-24197299	chrX:24190918-24193505					9;0	7;0	15;0	19;0	11;0	9;0	14;0	16;5
K	jcn_only_AD	FAM58A	chrX	-	chrX:152861646-152864423	chrX:152861646-152864419		chrX:152864420-152864423	chrX:152864423-152864424		0;14	0;0	2;30	0;5	0;15	0;5	0;18	0;3
K	intron_retention	ARMCX5,ARMCX5-GPRASP2	chrX	+	chrX:101854501-101854639				chrX:101854500-101854501;chrX:101854639-101854640		0;0	0;2	3;5	0;0	0;6	0;2	0;7	2;2
N	alternative_donor	THOC2	chrX	-	chrX:122772879-122774388	chrX:122772879-122774376		chrX:122774377-122774388	chrX:122774388-122774389		8;0	6;0	6;0	9;0	15;1	14;0	19;0	10;0
K	alternative_donor	ALG13	chrX	+	chrX:110924528-110925359	chrX:110924653-110925359		chrX:110924528-110924652	chrX:110924527-110924528		5;0	0;2	6;3	9;3	10;8	6;4	18;3	5;5
N	intron_retention	KRBOX4	chrX	+	chrX:46322729-46330576				chrX:46322728-46322729;chrX:46330576-46330577		0;0	0;0	0;0	2;0	2;2	0;0	0;0	0;2
K	cassette	OGT	chrX	+	chrX:70774443-70775803	chrX:70774443-70775039;chrX:70775236-70775803		chrX:70775040-70775235			9;36	0;11	7;22	0;15	0;30	0;15	0;31	5;23
K	cassette	TRAPPC2	chrX	-	chrX:13738102-13752643	chrX:13738102-13752162;chrX:13752305-13752643		chrX:13752163-13752304			0;1	0;1	3;2	0;0	2;1	3;3	3;2	2;3
K	alternative_last_exon	PRKX	chrX	-	chrX:3526987-3530217	chrX:3529376-3530217	chrX:3522411-3526986	chrX:3529263-3529375			26;4	6;1	23;2	16;4	36;9	18;2	33;5	17;6
K	intron_retention	KDM5C	chrX	-	chrX:53228071-53228158				chrX:53228070-53228071;chrX:53228158-53228159		14;0	18;0	34;0	44;2	34;2	30;0	34;0	44;2
K	jcn_only_AA	MORF4L2	chrX	-	chrX:102933529-102939608	chrX:102933580-102939608		chrX:102933529-102933579	chrX:102933528-102933529		3;0	0;0	13;5	2;2	17;9	3;3	17;8	7;0
K	alternative_first_exon	IKBKG	chrX	+	chrX:153770668-153780202	chrX:153775961-153780202	chrX:153770459-153770667	chrX:153775522-153775960			0;7	1;4	1;14	4;15	1;16	1;11	0;17	1;15
N	jcn_only_AD	MTM1	chrX	+	chrX:149767151-149783061	chrX:149769972-149783061		chrX:149767151-149769971	chrX:149767150-149767151		7;0	7;0	9;0	5;0	23;0	13;0	13;0	5;2
K	jcn_only_AD	ENOX2,RPGR	chrX	-	chrX:38136026-38150211	chrX:38136026-38146346					0;0	0;0	0;5	0;0	0;5	0;0	3;3	0;0
K	intron_retention	ACOT9	chrX	-	chrX:23751335-23752457				chrX:23751334-23751335;chrX:23752457-23752458		26;0	24;0	28;0	151;15	27;0	92;0	35;0	168;7
K	intron_retention	TAZ	chrX	+	chrX:153647963-153648043				chrX:153647962-153647963;chrX:153648043-153648044		0;0	0;0	8;5	7;2	13;0	3;0	9;3	7;0
K	jcn_only_AA	ABCB7	chrX	-	chrX:74334667-74375939	chrX:74334670-74375939		chrX:74334667-74334669	chrX:74334666-74334667		6;0	5;0	6;5	6;5	7;9	5;2	10;8	8;2
K	intron_retention	FLNA	chrX	-	chrX:153578576-153579276				chrX:153578575-153578576;chrX:153579276-153579277		231;6	82;2	441;13	434;20	324;7	249;10	381;6	315;8
K	intron_retention	DDX3X	chrX	+	chrX:41206705-41206892				chrX:41206704-41206705;chrX:41206892-41206893		73;0	84;0	149;0	184;8	195;0	177;5	181;0	231;9
K	intron_retention	MAGED2	chrX	+	chrX:54839594-54839920				chrX:54839593-54839594;chrX:54839920-54839921		23;0	19;0	35;0	81;5	27;0	73;2	34;0	76;2
K	alternative_acceptor	G6PD	chrX	-	chrX:153762712-153763382	chrX:153762715-153763382		chrX:153762712-153762714	chrX:153762711-153762712		101;0	49;0	139;0	110;0	109;0	69;0	98;0	124;2
K	intron_retention	FLNA	chrX	-	chrX:153583441-153585801				chrX:153583440-153583441;chrX:153585801-153585802		198;0	69;0	381;0	336;6	306;0	198;0	315;0	260;0
N	alternative_acceptor	USP9X	chrX	+	chrX:41010311-41012200	chrX:41010311-41012185		chrX:41012186-41012200	chrX:41012200-41012201		16;0	15;3	38;3	17;7	25;6	20;2	14;11	26;7
N	alternative_acceptor	ARHGEF6	chrX	-	chrX:135761820-135762889	chrX:135761832-135762889		chrX:135761820-135761831	chrX:135761819-135761820		18;0	9;0	14;0	11;0	27;0	15;0	26;1	11;0
K	jcn_only_AD	PQBP1	chrX	+	chrX:48755377-48755774;chrX:48755298-48755774	chrX:48755366-48755774		chrX:48755298-48755365;chrX:48755366-48755376	chrX:48755297-48755298;chrX:48755365-48755366		0;13	6;8	9;24	7;22	8;26	2;23	8;41	6;15
N	intron_retention		chrX	-	chrX:108926605-108976367				chrX:108926604-108926605;chrX:108976367-108976368		0;2	0;10	0;3	17;6	0;3	0;4	0;4	11;6
K	alternative_first_exon	G6PD	chrX	-	chrX:153774379-153775682	chrX:153774379-153775003	chrX:153775683-153775787	chrX:153775004-153775342			4;14	0;6	7;24	4;23	7;16	4;13	7;18	7;20
K	jcn_only_AA	LONRF3,ZNF185	chrX	+	chrX:118116907-118123370	chrX:118116907-118120887					0;0	0;0	5;0	0;0	7;0	0;0	13;2	2;0
K	intron_retention	NONO	chrX	+	chrX:70517789-70518318				chrX:70517788-70517789;chrX:70518318-70518319		76;0	50;6	113;2	86;8	217;5	88;2	165;4	106;3
K	intron_retention	GLA	chrX	-	chrX:100655746-100656619				chrX:100655745-100655746;chrX:100656619-100656620		63;2	52;10	149;7	115;6	132;9	83;7	144;6	168;10
K	cassette	KDM6A	chrX	+	chrX:44919402-44920568	chrX:44919402-44919853;chrX:44920010-44920568		chrX:44919854-44920009			0;3	2;3	6;3	6;17	9;4	11;6	7;2	13;9
K	alternative_last_exon	HDAC8	chrX	-	chrX:71684582-71708782	chrX:71694580-71708782	chrX:71684409-71684581	chrX:71693266-71694579			10;2	3;2	11;4	5;4	7;5	6;3	9;4	10;3
N	jcn_only_AD	ABCD1	chrX	+	chrX:153001968-153002610	chrX:153002366-153002610		chrX:153001968-153002365	chrX:153001967-153001968		27;0	23;3	22;0	59;0	20;0	51;0	39;5	81;5
N	jcn_only_AD	FAM104B,RAP2C	chrX	-	chrX:131339616-131348161	chrX:131339616-131347930		chrX:131347931-131348161	chrX:131348161-131348162		41;0	63;0	38;0	122;2	60;0	78;0	36;0	133;0
K	alternative_last_exon	HDAC8	chrX	-	chrX:71715119-71787738	chrX:71787647-71787738	chrX:71715006-71715118	chrX:71787432-71787646			4;0	4;0	8;2	5;1	14;2	9;1	9;1	9;1
K	intron_retention	GRIPAP1	chrX	-	chrX:48844611-48846022				chrX:48844610-48844611;chrX:48846022-48846023		11;0	15;0	15;0	32;5	17;0	27;3	16;0	39;2
K	cassette	BCOR	chrX	-	chrX:39930413-39931601	chrX:39930413-39930889;chrX:39930944-39931601		chrX:39930890-39930943			2;2	0;4	9;4	5;4	2;5	6;4	2;4	0;3
K	intron_retention	RPL10	chrX	+	chrX:153627936-153628143				chrX:153627935-153627936;chrX:153628143-153628144		759;0	382;0	1105;5	364;0	1235;2	450;2	1216;0	574;0
K	cassette	WBP5	chrX	+	chrX:102611535-102612542	chrX:102611535-102612010;chrX:102612090-102612542		chrX:102612011-102612089			5;21	5;20	14;55	11;45	17;64	8;33	6;51	8;53
K	intron_retention	RPL10	chrX	+	chrX:153627738-153627827				chrX:153627737-153627738;chrX:153627827-153627828		768;0	478;2	1380;6	549;4	1690;5	517;0	1447;5	697;3
K	jcn_only_AA	WDR45	chrX	-	chrX:48934410-48935301	chrX:48934413-48935301		chrX:48934410-48934412	chrX:48934409-48934410		8;0	7;0	17;3	39;0	17;2	19;5	10;2	27;2
K	intron_retention	THOC2	chrX	-	chrX:122757135-122757494				chrX:122757134-122757135;chrX:122757494-122757495		0;0	0;3	0;0	2;0	3;2	0;0	0;2	0;0
K	intron_retention	IRAK1	chrX	-	chrX:153278885-153281482				chrX:153278884-153278885;chrX:153281482-153281483		0;2	0;0	0;4	2;5	0;3	0;2	0;3	0;2
K	alternative_donor	HSD17B10,ZNF182	chrX	-	chrX:53458543-53458772	chrX:53458543-53458745		chrX:53458746-53458772	chrX:53458772-53458773	chrX:53458211-53458542	0;11	0;5	6;42	0;12	0;37	0;8	2;37	0;10
K	alternative_first_exon	CDK16	chrX	+	chrX:47078064-47082950;chrX:47078505-47082950	chrX:47081742-47082950	chrX:47077632-47078063;chrX:47078087-47078504	chrX:47081660-47081741			5;0	14;4	21;4	9;1	20;2	13;1	15;1	18;4
K	cassette	TIMM17B	chrX	-	chrX:48752385-48754041	chrX:48752385-48752634;chrX:48752785-48754041		chrX:48752635-48752784			22;3	16;5	47;4	32;5	61;5	23;3	47;4	40;6
K	intron_retention	GLA	chrX	-	chrX:100653556-100653772				chrX:100653555-100653556;chrX:100653772-100653773		65;2	39;9	144;5	127;11	150;6	107;7	180;6	138;10
K	intron_retention	VSIG4	chrX	-	chrX:65247955-65253315				chrX:65247954-65247955;chrX:65253315-65253316		23;0	5;0	85;2	14;0	155;5	18;2	89;3	26;0
K	jcn_only_AA	FAM122C	chrX	+	chrX:133941739-133948800	chrX:133941739-133943216		chrX:133943217-133948800	chrX:133948800-133948801		0;2	3;0	0;0	20;5	2;5	7;6	0;0	0;0
K	jcn_only_AD	USP9X	chrX	+	chrX:41089033-41089753	chrX:41089081-41089753		chrX:41089033-41089080	chrX:41089032-41089033		25;2	40;5	77;0	32;2	51;6	32;6	44;2	47;6
K	alternative_acceptor	ARMCX5,ARMCX5-GPRASP2	chrX	+	chrX:101854501-101854639	chrX:101854501-101854633		chrX:101854634-101854639	chrX:101854639-101854640		0;0	0;2	3;4	0;0	0;5	0;3	0;5	2;2
K	alternative_donor	KDM5C	chrX	-	chrX:53222819-53222963	chrX:53222819-53222954		chrX:53222955-53222963	chrX:53222963-53222964		17;4	14;5	22;7	27;6	30;5	22;7	30;12	36;11
K	alternative_donor	FTX,RBBP7	chrX	-	chrX:73501684-73513186	chrX:73501684-73512003		chrX:73512004-73513186	chrX:73513186-73513187		2;0	6;1	0;0	6;1	2;1	2;1	2;0	3;1
K	jcn_only_AA	G6PD	chrX	-	chrX:153762712-153763382	chrX:153762715-153763382		chrX:153762712-153762714	chrX:153762711-153762712		101;0	49;0	139;0	110;0	109;0	69;0	98;0	124;5
K	jcn_only_AA	MPP1	chrX	-	chrX:154014616-154018228	chrX:154014676-154018228		chrX:154014616-154014675	chrX:154014615-154014616		0;189	0;51	3;227	0;192	0;352	8;177	11;281	0;238
K	alternative_last_exon	RPL36A,RPL36A-HNRNPH2	chrX	+	chrX:100646811-100650322	chrX:100646811-100647037	chrX:100650323-100650781	chrX:100647038-100647083			117;0	68;0	116;0	29;0	187;1	42;0	170;0	56;0
K	alternative_donor	RBM10	chrX	+	chrX:47039437-47039610	chrX:47039440-47039610		chrX:47039437-47039439	chrX:47039436-47039437		2;3	2;0	8;3	11;3	9;3	7;6	15;8	7;3
K	intron_retention	BTK	chrX	-	chrX:100608977-100609617				chrX:100608976-100608977;chrX:100609617-100609618		39;4	22;2	51;10	66;12	63;6	60;2	61;5	58;10
K	intron_retention	WDR13	chrX	+	chrX:48456003-48456345				chrX:48456002-48456003;chrX:48456345-48456346		9;3	0;4	7;5	0;7	0;10	3;5	0;8	0;5
K	alternative_first_exon	FAM104B,NDUFB11	chrX	-	chrX:55185662-55187188;chrX:55185662-55187569	chrX:55185662-55187407	chrX:55187570-55187743	chrX:55187408-55187552			0;2	2;0	1;1	0;0	4;1	0;0	4;2	2;0
K	intron_retention	PLXNA3	chrX	+	chrX:153689979-153690467				chrX:153689978-153689979;chrX:153690467-153690468		0;0	3;0	3;0	15;4	5;0	7;0	8;2	8;0
N	jcn_only_AA	ENOX2	chrX	-	chrX:129771379-129790554	chrX:129771385-129790554		chrX:129771379-129771384	chrX:129771378-129771379		0;3	0;5	3;7	2;7	0;9	0;0	2;10	0;5
K	cassette	ACOT9	chrX	-	chrX:23751335-23761241	chrX:23751335-23754035;chrX:23754134-23761241		chrX:23754036-23754133			0;22	0;41	0;32	3;148	0;34	2;116	0;33	0;132
K	jcn_only_AA	PQBP1,REPS2	chrX	+	chrX:17040395-17043184	chrX:17040395-17043181		chrX:17043182-17043184	chrX:17043184-17043185		0;2	0;0	0;0	0;0	5;2	0;0	5;2	0;0
K	intron_retention	RBMX	chrX	-	chrX:135954505-135957244				chrX:135954504-135954505;chrX:135957244-135957245		0;3	2;2	0;3	0;2	3;7	2;3	0;9	0;5
K	jcn_only_AD	SNX12	chrX	-	chrX:70282800-70288003	chrX:70282800-70287991		chrX:70287992-70288003	chrX:70288003-70288004		0;19	0;13	0;47	0;39	2;72	0;19	0;57	0;28
K	jcn_only_AA	MOSPD2	chrX	+	chrX:14936905-14939501	chrX:14936905-14937793		chrX:14937794-14939501	chrX:14939501-14939502		0;18	0;9	16;15	0;11	7;31	0;18	15;27	0;14
K	alternative_acceptor	GAB3	chrX	-	chrX:153941699-153944300	chrX:153941702-153944300		chrX:153941699-153941701	chrX:153941698-153941699		0;2	0;0	5;3	3;0	0;2	3;2	0;4	2;2
K	alternative_acceptor	GPR34	chrX	+	chrX:41548338-41548998	chrX:41548338-41548995		chrX:41548996-41548998	chrX:41548998-41548999		7;34	0;0	9;43	0;0	23;74	0;0	31;89	0;0
N	alternative_donor	FAM104B,RAP2C	chrX	-	chrX:131339616-131348161	chrX:131339616-131347930		chrX:131347931-131348161	chrX:131348161-131348162		41;0	63;1	38;0	122;1	60;0	78;0	36;0	133;1
K	cassette	GK	chrX	+	chrX:30683702-30695491	chrX:30683702-30686128;chrX:30686236-30695491		chrX:30686129-30686235			0;7	5;51	0;9	0;44	0;6	0;61	0;10	0;105
K	cassette	BRCC3	chrX	+	chrX:154319115-154344331	chrX:154319115-154327589;chrX:154327665-154344331		chrX:154327590-154327664			14;4	13;2	13;3	9;1	19;7	10;3	25;7	14;2
K	intron_retention	SLC10A3	chrX	-	chrX:153718698-153718932				chrX:153718697-153718698;chrX:153718932-153718933		0;0	0;2	2;5	0;2	5;4	0;2	0;3	2;0
N	jcn_only_AA	VSIG4	chrX	-	chrX:65242009-65242682;chrX:65242530-65242682	chrX:65242343-65242682		chrX:65242009-65242342;chrX:65242343-65242529	chrX:65242008-65242009;chrX:65242342-65242343		22;101	8;14	70;352	28;61	152;717	42;83	78;452	49;97
K	intron_retention	CYBB	chrX	+	chrX:37639376-37641340				chrX:37639375-37639376;chrX:37641340-37641341		194;0	131;0	538;0	173;0	598;4	206;0	534;0	281;0
N	alternative_acceptor	ZNF75D	chrX	-	chrX:134429966-134475692	chrX:134472251-134475692		chrX:134429966-134472250	chrX:134429965-134429966		0;0	0;0	3;0	0;0	0;1	0;0	0;0	0;0
K	intron_retention	WDR45	chrX	-	chrX:48935407-48935495				chrX:48935406-48935407;chrX:48935495-48935496		15;0	11;0	19;0	28;3	16;0	16;2	13;0	28;2
K	alternative_acceptor	ARMCX3	chrX	+	chrX:100878421-100878803	chrX:100878421-100878775		chrX:100878776-100878803	chrX:100878803-100878804		0;0	0;0	0;3	2;1	0;0	0;2	0;4	2;4
K	alternative_first_exon	GRIPAP1	chrX	-	chrX:48855917-48858598	chrX:48855917-48857271	chrX:48858599-48858675	chrX:48857272-48857370			5;1	10;1	7;1	24;0	13;0	15;2	10;0	24;1
N	intron_retention		chrX	+	chrX:23802045-23803444				chrX:23802044-23802045;chrX:23803444-23803445		0;169	0;409	0;97	3;706	0;74	7;715	0;60	0;855
K	jcn_only_AD	FTX,RBBP7	chrX	-	chrX:73501684-73513186	chrX:73501684-73512003		chrX:73512004-73513186	chrX:73513186-73513187		2;0	6;0	0;0	6;0	2;0	2;2	2;0	3;7
K	intron_retention	VSIG4	chrX	-	chrX:65247955-65252309				chrX:65247954-65247955;chrX:65252309-65252310		166;0	25;0	434;0	81;0	793;7	128;2	542;0	122;0
K	alternative_donor	FAM104B,MORF4L2	chrX	-	chrX:55172745-55185561	chrX:55172745-55185558		chrX:55185559-55185561	chrX:55185561-55185562		3;0	0;0	10;0	0;0	17;1	2;0	13;0	0;0
K	alternative_first_exon	MSL3	chrX	+	chrX:11776485-11777911	chrX:11776893-11777911	chrX:11776278-11776484	chrX:11776701-11776892			4;0	4;0	5;1	4;0	8;0	3;1	9;0	3;0
K	alternative_acceptor	KDM5C	chrX	-	chrX:53250099-53253921	chrX:53250976-53253921		chrX:53250099-53250975	chrX:53250098-53250099		22;0	15;0	33;0	31;1	47;0	27;0	26;0	63;0
K	jcn_only_AA	SCML1	chrX	+	chrX:17755801-17764137;chrX:17755801-17762190	chrX:17755801-17764134					0;0	0;0	7;5	2;0	9;0	0;0	10;5	2;0
K	alternative_first_exon	CTPS2	chrX	-	chrX:16721065-16730844	chrX:16721065-16730457	chrX:16730845-16731059	chrX:16730458-16730775			0;2	0;1	1;2	0;3	1;5	1;2	0;3	0;4
N	jcn_only_AA	CA5BP1	chrX	+	chrX:102612090-102612545	chrX:102612090-102612542		chrX:102612543-102612545	chrX:102612545-102612546		0;27	0;18	0;60	0;56	2;73	0;28	2;52	0;49
K	jcn_only_AA	RAP2C	chrX	-	chrX:131352370-131353397;chrX:131351835-131353397	chrX:131352362-131353397					0;0	3;0	5;0	7;6	0;0	5;2	2;0	8;0
K	mutually_exclusive	KDM6A	chrX	+	chrX:44918712-44919853,chrX:44920010-44920568	chrX:44918712-44919266,chrX:44919402-44920568	chrX:44919854-44920009	chrX:44919267-44919401			2;0	2;4	2;5	1;6	4;7	3;12	1;10	10;9
N	alternative_acceptor	CLCN5	chrX	+	chrX:49807072-49834533	chrX:49807072-49814891		chrX:49814892-49834533	chrX:49834533-49834534		0;0	2;0	5;0	0;0	3;0	3;0	0;0	2;0
K	alternative_acceptor	FTSJ1,GPR34	chrX	+	chrX:41549089-41554880	chrX:41549089-41554807		chrX:41554808-41554880	chrX:41554880-41554881		0;71	0;0	0;90	0;0	25;163	0;0	16;172	0;2
K	cassette	BEX4	chrX	+	chrX:102470167-102471076	chrX:102470167-102470609;chrX:102470693-102471076		chrX:102470610-102470692			0;18	0;14	0;42	0;30	2;51	0;27	0;38	0;28
K	jcn_only_AA	ENOX2	chrX	-	chrX:129837229-129917520	chrX:129843306-129917520					7;0	0;0	5;0	2;0	5;0	2;0	6;5	0;0
K	cassette	TBL1X	chrX	+	chrX:9608401-9622254	chrX:9608401-9621584;chrX:9621730-9622254		chrX:9621585-9621729			6;5	3;4	0;2	0;4	2;4	3;9	3;2	0;12
K	alternative_first_exon	KLHL13	chrX	-	chrX:117079539-117250470	chrX:117079539-117162386	chrX:117250471-117250828	chrX:117162387-117162460			4;0	0;0	0;0	0;0	4;0	0;0	2;1	0;0
N	jcn_only_AA	ARHGEF6	chrX	-	chrX:135761820-135762889	chrX:135761832-135762889		chrX:135761820-135761831	chrX:135761819-135761820		18;0	9;0	14;0	11;0	27;0	15;0	26;2	11;0
K	jcn_only_AD	FAM104B,MORF4L2	chrX	-	chrX:55172745-55185561	chrX:55172745-55185558		chrX:55185559-55185561	chrX:55185561-55185562		3;0	0;0	10;0	0;0	17;2	2;0	13;0	0;0
K	alternative_donor	NAA10	chrX	-	chrX:153198038-153199413	chrX:153198038-153199395		chrX:153199396-153199413	chrX:153199413-153199414		0;13	0;4	1;28	0;5	0;27	0;2	0;28	0;18
K	alternative_first_exon	UBA1	chrX	+	chrX:47056424-47058201;chrX:47050350-47058201	chrX:47053424-47058201	chrX:47050260-47050349	chrX:47053241-47053423			5;37	7;64	15;88	6;117	12;80	9;85	12;89	10;103
K	cassette	MORF4L2	chrX	-	chrX:102931980-102940098	chrX:102931980-102933426;chrX:102933529-102940098		chrX:102933427-102933528			2;37	0;34	0;56	0;36	3;74	0;37	2;80	0;54
N	cassette	KRBOX4	chrX	+	chrX:46322729-46332184;chrX:46322744-46332184	chrX:46322744-46330576,chrX:46322729-46330576;chrX:46330621-46332184		chrX:46330577-46330620			0;1	0;0	2;0	0;1	8;4	6;0	2;1	8;0
K	jcn_only_AD	KLHL13,PSMD10	chrX	-	chrX:107328358-107330994	chrX:107328358-107330915		chrX:107330916-107330994	chrX:107330994-107330995		0;25	0;22	6;45	0;28	8;61	2;30	7;50	2;42
N	cassette	SH3KBP1	chrX	-	chrX:19560312-19568091	chrX:19560312-19564039;chrX:19564169-19568091		chrX:19564040-19564168			0;40	0;15	0;68	0;88	3;83	5;43	0;71	0;56
N	alternative_donor	MSN	chrX	+	chrX:64921504-64936679;chrX:64887721-64936679	chrX:64923554-64936679		chrX:64887721-64921503;chrX:64921504-64923553	chrX:64887720-64887721;chrX:64921503-64921504		338;0	232;0	623;0	715;0	778;0	599;0	822;0	708;0
N	cassette	CENPI	chrX	+	chrX:100403151-100417821	chrX:100403151-100416516;chrX:100416559-100417821		chrX:100416517-100416558			0;1	0;0	0;1	0;0	3;5	0;0	0;6	0;0
N	alternative_first_exon	RENBP	chrX	-	chrX:129208728-129244299	chrX:129208728-129215229	chrX:129244300-129244470	chrX:129215230-129215513			1;11	0;23	0;31	1;83	0;28	3;50	1;30	1;53
K	cassette	ACOT9	chrX	-	chrX:23751335-23754035	chrX:23751335-23752457;chrX:23752485-23754035		chrX:23752458-23752484			5;25	9;24	9;24	49;133	19;23	61;85	9;30	35;133
N	alternative_acceptor		chrX	+	chrX:48546843-48547204	chrX:48546843-48547048		chrX:48547049-48547204	chrX:48547204-48547205		0;26	0;6	0;44	0;19	2;48	0;25	0;51	0;34
K	alternative_acceptor	FAM58A	chrX	-	chrX:152853853-152857963	chrX:152853913-152857963		chrX:152853853-152853912	chrX:152853852-152853853		3;3	0;1	11;4	2;3	6;8	3;1	6;11	6;5
K	intron_retention	DDX3X	chrX	+	chrX:41196719-41200736				chrX:41196718-41196719;chrX:41200736-41200737		2;0	0;2	0;5	2;9	0;0	2;3	0;2	2;9
N	alternative_donor	RRAGB	chrX	+	chrX:55778787-55779824;chrX:55777630-55779824	chrX:55778835-55779824		chrX:55777630-55778786;chrX:55778787-55778834	chrX:55777629-55777630;chrX:55778786-55778787		2;0	2;0	2;0	0;0	6;0	3;0	0;0	5;0
K	alternative_donor	FAM58A	chrX	-	chrX:152861646-152864423	chrX:152861646-152864419		chrX:152864420-152864423	chrX:152864423-152864424		0;7	0;0	2;14	0;2	0;7	0;2	0;9	0;2
K	intron_retention	SLC10A3	chrX	-	chrX:153716836-153716922				chrX:153716835-153716836;chrX:153716922-153716923		0;11	0;8	0;10	0;12	2;16	0;11	2;15	6;11
K	jcn_only_AA	FMR1	chrX	+	chrX:147024847-147026424;chrX:147024847-147026388	chrX:147024847-147026463		chrX:147026389-147026424;chrX:147026425-147026463	chrX:147026424-147026425;chrX:147026463-147026464		5;2	6;2	5;3	28;10	15;2	26;3	13;2	32;0
K	alternative_acceptor	BRCC3	chrX	+	chrX:154300619-154301651	chrX:154300619-154301648		chrX:154301649-154301651	chrX:154301651-154301652		8;0	9;0	19;3	16;0	35;1	11;0	38;4	14;0
K	intron_retention	FLNA	chrX	-	chrX:153579410-153579948				chrX:153579409-153579410;chrX:153579948-153579949		323;8	94;2	525;16	472;34	426;15	240;10	463;10	389;14
K	cassette	ATRX	chrX	-	chrX:76944421-76952064	chrX:76944421-76949312;chrX:76949427-76952064		chrX:76949313-76949426			0;5	0;2	0;7	0;8	3;8	0;2	2;11	2;7
K	intron_retention	GDI1	chrX	+	chrX:153668487-153668721				chrX:153668486-153668487;chrX:153668721-153668722		30;5	44;2	39;7	105;7	66;5	77;4	56;0	128;3
K	cassette	RLIM	chrX	-	chrX:73815836-73834256	chrX:73815836-73832416;chrX:73832479-73834256		chrX:73832417-73832478			6;0	10;0	15;2	11;1	11;0	5;0	13;2	8;1
K	jcn_only_AA	FMR1,SSR4	chrX	+	chrX:147027137-147030253	chrX:147027137-147030202		chrX:147030203-147030253	chrX:147030253-147030254		0;6	0;6	0;8	0;39	9;15	10;24	9;9	0;25
K	coord_cassette	ZFX	chrX	+	chrX:24167912-24190831	chrX:24167912-24169807;chrX:24169918-24170836;chrX:24170948-24190831		chrX:24169808-24169917;chrX:24170837-24170947			0;0	2;3	0;4	2;9	2;3	3;6	5;6	0;7
K	alternative_acceptor	PHF6	chrX	+	chrX:133527983-133547520	chrX:133527983-133547517		chrX:133547518-133547520	chrX:133547520-133547521		6;1	7;1	7;2	10;2	23;2	0;0	11;1	17;2
N	jcn_only_AD	HNRNPH2	chrX	+	chrX:100663296-100666923	chrX:100663308-100666923		chrX:100663296-100663307	chrX:100663295-100663296		2;15	0;22	5;36	7;33	11;48	11;24	6;34	5;35
K	cassette	MPP1	chrX	-	chrX:154020561-154033546	chrX:154020561-154028019;chrX:154028169-154033546		chrX:154028020-154028168			111;2	36;1	169;2	132;2	219;3	117;3	233;3	144;5
K	intron_retention	PDHA1	chrX	+	chrX:19371292-19372608				chrX:19371291-19371292;chrX:19372608-19372609		11;0	6;0	39;0	10;3	28;3	11;0	49;0	7;0
K	alternative_last_exon	ARMCX5-GPRASP2	chrX	+	chrX:101856438-101860409	chrX:101856438-101856807	chrX:101860410-101860581	chrX:101856808-101859087			4;7	2;4	3;10	2;6	6;12	1;4	3;12	1;6
K	intron_retention	WDR13	chrX	+	chrX:48456426-48457138				chrX:48456425-48456426;chrX:48457138-48457139		2;3	3;3	2;10	0;6	7;6	0;7	8;9	5;5
K	alternative_donor	HUWE1	chrX	-	chrX:53569501-53570846	chrX:53569501-53570801		chrX:53570802-53570846	chrX:53570846-53570847		0;15	0;13	7;22	15;24	11;33	0;20	13;25	0;24
K	jcn_only_AD	ALG13	chrX	+	chrX:110924528-110925359	chrX:110924653-110925359		chrX:110924528-110924652	chrX:110924527-110924528		5;0	0;0	6;5	9;6	10;9	6;7	18;6	5;7
K	intron_retention	GPR34	chrX	+	chrX:41549089-41554880				chrX:41549088-41549089;chrX:41554880-41554881		0;35	0;0	0;44	0;0	25;77	0;0	16;85	0;2
K	alternative_donor	RBM10	chrX	+	chrX:47004885-47006755	chrX:47004916-47006755		chrX:47004885-47004915	chrX:47004884-47004885		6;0	5;0	15;1	9;1	15;1	6;0	16;0	10;4
K	jcn_only_AD	HUWE1	chrX	-	chrX:53627270-53629551	chrX:53627270-53629524		chrX:53629525-53629551	chrX:53629551-53629552		0;19	0;18	0;20	0;53	3;48	0;20	0;45	0;31
K	cassette	TRMT2B	chrX	-	chrX:100292063-100296305	chrX:100292063-100292905;chrX:100293041-100296305		chrX:100292906-100293040			0;7	2;2	0;11	0;5	0;10	0;5	0;11	0;5
K	alternative_acceptor	FAM122B	chrX	-	chrX:133905385-133915850	chrX:133906314-133915850		chrX:133905385-133906313	chrX:133905384-133905385		0;6	2;7	5;9	0;9	0;17	2;6	0;15	5;7
K	intron_retention	ACOT9	chrX	-	chrX:23751335-23754035				chrX:23751334-23751335;chrX:23754035-23754036		5;0	9;0	9;0	49;15	19;0	61;2	9;0	35;7
K	intron_retention	LONRF3	chrX	+	chrX:118147165-118148169				chrX:118147164-118147165;chrX:118148169-118148170		10;2	0;0	16;2	9;0	18;0	6;0	20;0	8;0
K	alternative_donor	OTUD5	chrX	-	chrX:48791886-48791983	chrX:48791886-48791968		chrX:48791969-48791983	chrX:48791983-48791984		18;0	20;1	18;0	30;0	43;2	42;0	24;1	56;0
N	jcn_only_AA	PHKA2	chrX	-	chrX:18954269-18956744	chrX:18954320-18956744		chrX:18954269-18954319	chrX:18954268-18954269		9;0	0;2	6;0	3;0	19;0	6;0	9;0	7;0
K	intron_retention	RENBP	chrX	-	chrX:153207485-153208306				chrX:153207484-153207485;chrX:153208306-153208307		64;2	23;0	167;5	50;6	213;7	50;0	194;9	55;0
K	intron_retention		chrX	.	chrX:23801535-23801774				chrX:23801534-23801535;chrX:23801774-23801775		564;0	1103;5	460;6	2144;5	401;0	2570;7	235;0	2881;13
K	jcn_only_AA	RPGR	chrX	-	chrX:38136026-38150211	chrX:38147295-38150211					0;2	0;5	0;3	0;2	0;5	0;0	3;6	0;3
N	alternative_acceptor	IDS	chrX	-	chrX:148584976-148585686	chrX:148585020-148585686		chrX:148584976-148585019	chrX:148584975-148584976		2;38	0;35	2;58	8;61	0;37	0;64	0;35	5;80
K	jcn_only_AD	ALG13	chrX	+	chrX:110924528-110925463	chrX:110924653-110925463		chrX:110924528-110924652	chrX:110924527-110924528		0;0	0;0	2;0	0;3	0;3	2;0	0;2	0;2
K	jcn_only_AD	TCEAL4	chrX	+	chrX:102840553-102841146	chrX:102840612-102841146		chrX:102840553-102840611	chrX:102840552-102840553		16;0	9;0	38;0	19;0	34;3	17;0	39;2	18;2
N	alternative_acceptor	VSIG4	chrX	-	chrX:65242009-65242682;chrX:65242530-65242682	chrX:65242343-65242682		chrX:65242009-65242342;chrX:65242343-65242529	chrX:65242008-65242009;chrX:65242342-65242343		27;176	9;21	88;519	29;88	183;1041	46;128	97;670	52;145
K	alternative_first_exon	BCOR,CTPS2	chrX	-	chrX:39937223-40036259	chrX:39937223-39956467	chrX:40036260-40036582	chrX:39956468-39956656			0;3	0;6	0;4	0;5	0;4	0;1	1;4	0;1
N	alternative_donor	BCAP31	chrX	-	chrX:128945486-128947636	chrX:128945486-128946693		chrX:128946694-128947636	chrX:128947636-128947637		0;0	0;4	0;1	0;12	0;2	2;10	0;0	0;7
N	alternative_donor	KRBOX4	chrX	+	chrX:46322729-46330576	chrX:46322744-46330576		chrX:46322729-46322743	chrX:46322728-46322729		0;0	0;0	0;0	2;0	2;1	0;0	0;0	0;2
K	intron_retention	SASH3	chrX	+	chrX:128926453-128926602				chrX:128926452-128926453;chrX:128926602-128926603		65;0	48;2	103;0	80;0	110;3	151;0	165;0	160;2
N	cassette	SH3BGRL	chrX	+	chrX:80457745-80492616;chrX:80457745-80532482	chrX:80457745-80457935;chrX:80458076-80492616,chrX:80458076-80532482		chrX:80457936-80458075			255;28	211;9	199;24	215;4	290;33	203;11	281;37	233;18
N	jcn_only_AA	RRAGB	chrX	+	chrX:55779948-55782273	chrX:55779948-55781500		chrX:55781501-55782273	chrX:55782273-55782274		3;0	2;0	6;0	3;0	2;2	0;0	0;0	2;0
K	alternative_donor	SNX12	chrX	-	chrX:70282800-70288003	chrX:70282800-70287991		chrX:70287992-70288003	chrX:70288003-70288004		0;14	0;6	0;30	0;20	2;40	0;11	0;32	0;17
K	intron_retention	MSL3	chrX	+	chrX:11782058-11783585				chrX:11782057-11782058;chrX:11783585-11783586		6;0	8;0	23;2	22;3	20;4	30;3	16;0	24;5
N	cassette	DIAPH2	chrX	+	chrX:95940190-95993584	chrX:95940190-95990756;chrX:95990790-95993584		chrX:95990757-95990789			0;3	0;3	0;7	0;6	3;10	0;4	8;9	0;3
K	alternative_donor	ZNF182	chrX	-	chrX:47863102-47863307	chrX:47863102-47863302		chrX:47863303-47863307	chrX:47863307-47863308		2;0	3;0	0;0	0;0	3;0	2;0	2;1	0;0
N	jcn_only_AD	RENBP	chrX	-	chrX:153209871-153210035	chrX:153209871-153209958		chrX:153209959-153210035	chrX:153210035-153210036		38;0	10;0	99;0	35;0	131;0	23;0	117;0	45;3
K	alternative_acceptor	SSR4	chrX	+	chrX:153060210-153061888	chrX:153060210-153061117		chrX:153061118-153061888	chrX:153061888-153061889		68;3	56;2	123;2	110;2	161;3	131;2	140;4	125;2
N	coord_cassette	CASK	chrX	-	chrX:41413169-41419031	chrX:41413169-41414852;chrX:41414889-41416284;chrX:41416354-41419031		chrX:41414853-41414888;chrX:41416285-41416353			0;0	0;1	0;0	0;1	0;1	0;1	0;0	3;2
K	intron_retention	ARMCX6	chrX	-	chrX:100870751-100871661				chrX:100870750-100870751;chrX:100871661-100871662		20;3	6;2	32;9	10;8	32;8	14;3	39;9	18;7
K	alternative_first_exon	ARHGAP4,MORF4L2,NAA10	chrX	-	chrX:102940189-102942916	chrX:102940189-102941558	chrX:102942917-102943086	chrX:102941559-102941746			7;8	5;6	13;15	9;11	16;31	9;7	13;26	19;14
K	cassette	VSIG4	chrX	-	chrX:65247955-65253315	chrX:65247955-65252309;chrX:65252592-65253315		chrX:65252310-65252591			23;195	5;29	85;529	14;105	155;1039	18;152	89;689	26;174
K	intron_retention	THOC2	chrX	-	chrX:122757135-122757637				chrX:122757134-122757135;chrX:122757637-122757638		6;2	6;3	14;2	10;0	13;2	10;0	10;0	8;0
K	jcn_only_AD	GK	chrX	+	chrX:30695570-30709239	chrX:30705734-30709239		chrX:30695570-30705733	chrX:30695569-30695570		9;0	74;13	19;0	55;0	11;0	88;0	15;0	138;36
K	cassette	RBM41	chrX	-	chrX:106332070-106358581	chrX:106332070-106356626;chrX:106356699-106358581		chrX:106356627-106356698			2;1	0;1	5;0	5;1	6;1	5;1	5;2	5;4
K	alternative_last_exon	ATP7A,PBDC1	chrX	+	chrX:77166333-77178495;chrX:77166333-77227117	chrX:77166333-77218119	chrX:77227118-77227258	chrX:77218120-77220387			4;0	2;0	9;1	2;0	13;1	2;0	13;1	4;0
K	cassette	FAM3A	chrX	-	chrX:153740205-153744083	chrX:153740205-153741146;chrX:153741261-153744083		chrX:153741147-153741260			0;15	0;8	5;19	0;6	0;24	0;6	0;21	1;17
K	jcn_only_AD	CXorf40A	chrX	+	chrX:148623612-148626913	chrX:148623631-148626913		chrX:148623612-148623630	chrX:148623611-148623612		0;0	0;3	3;0	5;7	5;9	0;3	2;7	2;3
K	intron_retention	WAS	chrX	+	chrX:48545345-48546442				chrX:48545344-48545345;chrX:48546442-48546443		45;2	27;0	65;0	30;0	97;0	60;0	74;2	82;2
N	alternative_acceptor	RRAGB	chrX	+	chrX:55779948-55782273	chrX:55779948-55781500		chrX:55781501-55782273	chrX:55782273-55782274		3;2	2;1	6;2	3;2	2;3	0;1	0;1	2;2
K	intron_retention	CYBB	chrX	+	chrX:37653064-37655203				chrX:37653063-37653064;chrX:37655203-37655204		161;5	116;6	441;3	165;3	506;11	158;10	450;7	260;10
K	intron_retention	TMSB4X	chrX	+	chrX:12993563-12994364				chrX:12993562-12993563;chrX:12994364-12994365		0;25	0;30	5;53	0;60	0;41	0;48	0;50	5;54
K	jcn_only_AD	G6PD,RENBP	chrX	-	chrX:153201030-153205554	chrX:153201030-153201456					43;0	3;0	116;0	55;0	114;0	26;0	98;2	38;0
K	jcn_only_AA	GPR34	chrX	+	chrX:41548338-41548998	chrX:41548338-41548995		chrX:41548996-41548998	chrX:41548998-41548999		7;68	0;0	9;88	0;0	23;151	0;0	31;182	0;0
K	intron_retention	ATP6AP1	chrX	+	chrX:153660004-153660175				chrX:153660003-153660004;chrX:153660175-153660176		0;2	0;0	0;0	0;6	11;2	0;5	0;2	2;3
K	alternative_last_exon	DIAPH2,NGFRAP1	chrX	+	chrX:96684745-96854251	chrX:96684745-96724692	chrX:96854252-96859996	chrX:96724693-96724837			5;1	2;2	9;4	4;2	9;3	4;1	8;6	3;1
N	alternative_donor	MTM1	chrX	+	chrX:149767151-149783061	chrX:149769972-149783061		chrX:149767151-149769971	chrX:149767150-149767151		7;0	7;0	9;0	5;1	23;0	13;0	13;0	5;0
K	jcn_only_AA	IRAK1	chrX	-	chrX:153278795-153279492	chrX:153278885-153279492		chrX:153278795-153278884	chrX:153278794-153278795		9;50	0;16	9;88	17;64	23;109	6;35	16;97	9;53
K	intron_retention	GK	chrX	+	chrX:30714801-30718530				chrX:30714800-30714801;chrX:30718530-30718531		13;0	90;9	14;0	72;2	7;0	72;11	18;0	183;15
K	cassette	ACOT9	chrX	-	chrX:23726062-23739997	chrX:23726062-23731251;chrX:23731326-23739997		chrX:23731252-23731325			0;32	0;37	0;40	18;196	0;41	8;140	0;49	0;177
N	alternative_donor	KDM6A	chrX	+	chrX:44923063-44928823	chrX:44928289-44928823		chrX:44923063-44928288	chrX:44923062-44923063		10;0	9;0	17;0	20;1	14;0	23;0	13;0	26;0
K	alternative_acceptor	ANOS1	chrX	-	chrX:8522140-8536272	chrX:8534254-8536272		chrX:8522140-8534253	chrX:8522139-8522140		3;0	3;0	36;0	5;0	17;0	6;0	2;0	3;0
K	alternative_donor	TCEAL3	chrX	+	chrX:102862987-102863531	chrX:102862999-102863531		chrX:102862987-102862998	chrX:102862986-102862987		0;2	0;0	19;1	6;2	13;2	6;0	18;2	8;1
N	jcn_only_AA	DDX26B	chrX	+	chrX:134703357-134706739	chrX:134703357-134704360		chrX:134704361-134706739	chrX:134706739-134706740		3;0	0;0	0;0	0;0	0;5	0;0	0;3	0;5
K	alternative_first_exon	TMSB4X	chrX	+	chrX:12993288-12994364	chrX:12993563-12994364	chrX:12993227-12993287	chrX:12993363-12993562			4630;19	5719;32	7511;37	6083;44	9787;35	7510;39	9609;21	11621;67
K	jcn_only_AD	HUWE1	chrX	-	chrX:53569501-53570846	chrX:53569501-53570801		chrX:53570802-53570846	chrX:53570846-53570847		0;20	0;19	7;43	15;39	11;55	0;41	13;45	0;34
K	intron_retention	BCAP31	chrX	-	chrX:152988744-152989788				chrX:152988743-152988744;chrX:152989788-152989789		152;0	61;0	225;2	135;0	295;6	124;2	313;3	155;0
K	cassette	NONO	chrX	+	chrX:70504304-70510478	chrX:70504304-70504833;chrX:70504948-70510478		chrX:70504834-70504947			55;2	52;4	83;4	51;7	122;6	55;4	131;6	60;4
K	alternative_first_exon	PDHA1	chrX	+	chrX:19362213-19367429	chrX:19364742-19367429	chrX:19362011-19362212	chrX:19364628-19364741			13;0	4;0	37;1	14;0	33;0	12;0	37;2	10;0
K	intron_retention	RPL10	chrX	+	chrX:153628968-153629042				chrX:153628967-153628968;chrX:153629042-153629043		548;7	244;13	694;18	275;19	794;16	273;10	724;15	348;11
K	jcn_only_AD	RBMX	chrX	-	chrX:135954505-135957244	chrX:135954505-135955404		chrX:135955405-135957244	chrX:135957244-135957245		0;0	2;0	0;0	0;0	3;2	2;0	0;0	0;0
K	intron_retention	GK	chrX	+	chrX:30715867-30718530				chrX:30715866-30715867;chrX:30718530-30718531		0;0	7;5	3;0	7;2	0;0	19;7	1;0	18;18
K	jcn_only_AD	FAM199X	chrX	+	chrX:103432859-103434288	chrX:103432988-103434288		chrX:103432859-103432987	chrX:103432858-103432859		0;16	0;13	0;33	0;15	2;26	0;15	0;27	0;15
N	alternative_acceptor	ACSL4	chrX	-	chrX:108926602-108939372	chrX:108926605-108939372		chrX:108926602-108926604	chrX:108926601-108926602		5;2	30;15	6;0	33;5	7;5	23;5	11;3	22;4
N	intron_retention		chrX	-	chrX:48831704-48832429				chrX:48831703-48831704;chrX:48832429-48832430		0;2	0;2	0;2	0;14	0;9	0;6	0;3	2;10
K	jcn_only_AA	OGT,TCEAL4	chrX	+	chrX:70753187-70756057	chrX:70753187-70756027		chrX:70756028-70756057	chrX:70756057-70756058		3;22	0;2	0;27	0;14	0;24	0;8	0;22	6;14
K	alternative_first_exon	TSC22D3	chrX	-	chrX:106959181-106959919	chrX:106959181-106959544	chrX:106959920-106960365	chrX:106959545-106959775			10;0	9;2	26;0	16;0	23;0	17;2	12;1	22;3
K	cassette	ALG13	chrX	+	chrX:110964940-110967025	chrX:110964940-110966020;chrX:110966086-110967025		chrX:110966021-110966085			0;3	0;4	2;6	0;7	0;7	0;4	2;5	0;5
K	cassette	ELK1	chrX	-	chrX:47500875-47509821	chrX:47500875-47509319;chrX:47509426-47509821		chrX:47509320-47509425			6;2	7;5	10;6	18;18	13;8	16;11	10;6	13;17
K	intron_retention	ATP6AP1	chrX	+	chrX:153662793-153663484				chrX:153662792-153662793;chrX:153663484-153663485		305;2	223;3	423;0	313;2	375;2	314;0	374;0	438;0
K	cassette	STAG2	chrX	+	chrX:123094717-123156380;chrX:123095707-123156380	chrX:123095707-123155216,chrX:123094717-123155216;chrX:123155282-123156380		chrX:123155217-123155281			2;5	16;4	9;1	11;8	8;3	5;3	6;2	17;4
K	intron_retention	IRAK1	chrX	-	chrX:153283807-153284049				chrX:153283806-153283807;chrX:153284049-153284050		90;0	25;0	178;5	117;5	298;5	64;2	264;3	132;0
K	jcn_only_AA	HUWE1	chrX	-	chrX:53652220-53654360	chrX:53652990-53654360					8;0	7;9	10;7	17;16	22;0	6;11	19;22	14;0
K	cassette	TAZ	chrX	+	chrX:153647963-153648370	chrX:153647963-153648043;chrX:153648086-153648370		chrX:153648044-153648085			0;3	0;2	6;8	2;4	7;16	0;3	3;11	0;6
K	alternative_donor	BCOR,DNASE1L1	chrX	-	chrX:153633997-153637447	chrX:153633997-153636893		chrX:153636894-153637447	chrX:153637447-153637448		13;2	3;1	24;2	14;3	18;6	11;2	39;3	16;3
K	jcn_only_AA	LONRF3,TAF1	chrX	+	chrX:70595137-70596862	chrX:70595137-70596799		chrX:70596800-70596862	chrX:70596862-70596863		0;6	3;7	0;6	0;10	0;7	2;2	3;7	0;6
K	alternative_donor	PIR,TSC22D3	chrX	-	chrX:15509433-15511312	chrX:15509433-15511278		chrX:15511279-15511312	chrX:15511312-15511313		3;0	0;0	9;2	11;0	10;1	2;0	8;0	0;0
K	intron_retention	FLNA	chrX	-	chrX:153577405-153577729				chrX:153577404-153577405;chrX:153577729-153577730		222;2	66;0	484;3	400;6	336;2	195;0	347;3	295;0
N	jcn_only_AD	RRAGB	chrX	+	chrX:55778787-55779824;chrX:55777630-55779824	chrX:55778835-55779824		chrX:55777630-55778786;chrX:55778787-55778834	chrX:55777629-55777630;chrX:55778786-55778787		2;0	2;0	5;0	0;0	6;6	3;0	0;0	5;0
K	intron_retention	TAZ	chrX	+	chrX:153648086-153648370				chrX:153648085-153648086;chrX:153648370-153648371		8;0	5;2	13;2	3;0	26;3	5;0	19;3	8;2
K	cassette	MBNL3	chrX	-	chrX:131513706-131516205	chrX:131513706-131515386;chrX:131515461-131516205		chrX:131515387-131515460			8;0	0;0	2;0	0;0	6;2	0;0	9;2	0;0
K	alternative_first_exon	ACSL4,FTX	chrX	-	chrX:108926896-108976367	chrX:108926896-108928655	chrX:108976368-108976632	chrX:108928656-108928673			0;0	0;0	0;0	0;0	0;0	3;2	0;0	3;0
K	intron_retention	UBA1	chrX	+	chrX:47074037-47074192				chrX:47074036-47074037;chrX:47074192-47074193		85;0	93;0	108;2	167;0	134;0	113;0	108;0	145;2
K	jcn_only_AD	PRPS2	chrX	+	chrX:12817510-12827352	chrX:12817519-12827352		chrX:12817510-12817518	chrX:12817509-12817510		7;0	10;0	23;2	7;0	32;10	13;0	43;2	5;0
K	coord_cassette	ATP6AP2	chrX	+	chrX:40450618-40457932	chrX:40450618-40456500;chrX:40456597-40456778;chrX:40456917-40457932		chrX:40456501-40456596;chrX:40456779-40456916			6;326	0;97	0;312	0;120	0;448	0;160	0;423	0;213
N	jcn_only_AA		chrX	.	chrX:23801535-23801774	chrX:23801535-23801760		chrX:23801761-23801774	chrX:23801774-23801775		564;0	1103;0	460;0	2144;0	401;0	2570;6	235;0	2881;6
K	jcn_only_AA	ARMCX5,ARMCX5-GPRASP2	chrX	+	chrX:101854501-101854639	chrX:101854501-101854633		chrX:101854634-101854639	chrX:101854639-101854640		0;0	0;0	3;2	0;0	0;5	0;2	0;0	2;0
K	alternative_acceptor	DDX3X	chrX	+	chrX:41206266-41206567	chrX:41206266-41206564		chrX:41206565-41206567	chrX:41206567-41206568		36;40	26;39	50;52	84;94	60;46	78;71	68;57	83;87
K	intron_retention	MSL3	chrX	+	chrX:11783849-11786691				chrX:11783848-11783849;chrX:11786691-11786692		9;2	5;0	25;6	15;4	18;0	23;4	14;2	24;6
K	jcn_only_AA	ZMAT1	chrX	-	chrX:101150853-101152840	chrX:101150856-101152840		chrX:101150853-101150855	chrX:101150852-101150853		0;0	0;0	0;0	0;0	0;0	0;0	0;0	2;2
N	cassette	CASK	chrX	-	chrX:41413169-41419031	chrX:41413169-41414852;chrX:41414889-41419031		chrX:41414853-41414888			0;2	0;1	0;1	0;4	0;2	0;2	0;4	3;1
K	intron_retention	TAZ	chrX	+	chrX:153647963-153648370				chrX:153647962-153647963;chrX:153648370-153648371		0;0	0;2	6;3	2;2	7;3	0;0	3;5	0;0
K	cassette	RBM10	chrX	+	chrX:47028898-47032526	chrX:47028898-47030426;chrX:47030658-47032526		chrX:47030427-47030657			2;6	0;4	2;8	0;9	5;14	2;7	7;17	5;10
K	alternative_last_exon	AP1S2	chrX	-	chrX:15849692-15863501;chrX:15845496-15863501	chrX:15846324-15863501	chrX:15843929-15845495	chrX:15846315-15846323			140;0	50;0	327;2	80;0	391;0	88;0	293;1	79;0
K	intron_retention	ALG13	chrX	+	chrX:110924528-110925463				chrX:110924527-110924528;chrX:110925463-110925464		0;0	0;0	2;8	0;4	0;11	2;6	0;10	0;9
K	cassette	RAB9A	chrX	+	chrX:13707408-13726839	chrX:13707408-13721932;chrX:13722022-13726839		chrX:13721933-13722021			10;19	3;11	7;34	22;82	11;36	14;41	8;27	11;46
K	intron_retention	ACOT9	chrX	-	chrX:23752485-23754035				chrX:23752484-23752485;chrX:23754035-23754036		32;0	32;2	27;0	155;5	25;0	103;2	34;0	138;0
K	intron_retention	DNASE1L1	chrX	-	chrX:153631183-153631282				chrX:153631182-153631183;chrX:153631282-153631283		16;0	6;0	26;0	24;2	34;0	14;0	39;2	26;0
K	intron_retention	RBM3	chrX	+	chrX:48434056-48434701				chrX:48434055-48434056;chrX:48434701-48434702		73;11	38;3	151;13	100;9	200;14	50;6	219;12	53;10
K	cassette	FLNA	chrX	-	chrX:153583441-153585801	chrX:153583441-153585618;chrX:153585643-153585801		chrX:153585619-153585642			198;52	69;14	381;114	336;108	306;105	198;55	315;89	260;53
K	intron_retention	WAS	chrX	+	chrX:48546486-48546688				chrX:48546485-48546486;chrX:48546688-48546689		34;0	22;0	63;0	26;0	81;6	43;0	81;2	64;3
K	intron_retention	IDS	chrX	-	chrX:148582569-148584841				chrX:148582568-148582569;chrX:148584841-148584842		32;0	44;0	95;0	106;5	56;0	100;2	77;2	131;2
K	cassette	SLC25A14	chrX	+	chrX:129483320-129492613	chrX:129483320-129484619;chrX:129484706-129492613		chrX:129484620-129484705			0;0	0;1	5;1	0;1	0;3	0;2	0;1	0;3
K	intron_retention	RBM3	chrX	+	chrX:48435498-48435852				chrX:48435497-48435498;chrX:48435852-48435853		69;0	41;0	126;2	99;5	148;3	45;0	128;0	50;0
N	alternative_acceptor	GRIPAP1	chrX	-	chrX:48831704-48832429	chrX:48831722-48832429		chrX:48831704-48831721	chrX:48831703-48831704		0;8	0;9	0;10	0;33	0;15	0;22	0;12	2;37
K	jcn_only_AA	FMR1,IL13RA1	chrX	+	chrX:147024847-147026424;chrX:147024847-147026463	chrX:147024847-147026388		chrX:147026389-147026424;chrX:147026425-147026463	chrX:147026424-147026425;chrX:147026463-147026464		2;5	2;6	3;5	10;28	5;13	7;23	2;13	0;32
N	jcn_only_AD	KRBOX4	chrX	+	chrX:46322729-46330576	chrX:46322744-46330576		chrX:46322729-46322743	chrX:46322728-46322729		0;0	0;0	0;0	2;0	2;2	0;0	0;0	0;0
N	jcn_only_AA		chrX	+	chrX:48546843-48547204	chrX:48546843-48547048		chrX:48547049-48547204	chrX:48547204-48547205		0;33	0;11	0;80	0;32	2;70	0;39	0;73	0;56
N	jcn_only_AA	MSN	chrX	+	chrX:64887721-64936679	chrX:64887721-64921374		chrX:64921375-64936679	chrX:64936679-64936680		338;0	232;0	623;0	715;0	778;0	599;0	822;3	708;0
K	alternative_first_exon	HUWE1,MORC4	chrX	-	chrX:53707140-53710314,chrX:53707140-53713110;chrX:53707140-53713214	chrX:53707140-53710818	chrX:53713215-53713313	chrX:53710819-53711114			4;5	4;4	5;7	8;7	6;8	5;7	7;6	9;11
K	intron_retention	RBMX	chrX	-	chrX:135954505-135955404				chrX:135954504-135954505;chrX:135955404-135955405		0;6	0;5	0;3	0;5	2;11	0;2	0;9	0;4
K	cassette	FAM3A	chrX	-	chrX:153740205-153741146	chrX:153740205-153740637;chrX:153740736-153741146		chrX:153740638-153740735			16;3	9;3	13;4	7;0	15;4	7;3	19;3	15;2
N	jcn_only_AD	ATP7A	chrX	+	chrX:77166333-77227117	chrX:77218312-77227117		chrX:77166333-77218311	chrX:77166332-77166333		3;2	0;0	6;0	0;0	10;0	2;3	9;0	0;0
K	cassette	ZNF185	chrX	+	chrX:152090801-152097118;chrX:152090801-152100215	chrX:152090801-152091263;chrX:152091354-152097118,chrX:152091354-152100215		chrX:152091264-152091353			3;2	0;0	6;5	3;1	6;3	0;0	27;6	7;4
N	alternative_acceptor	VSIG4	chrX	-	chrX:65242530-65242682;chrX:65242343-65242682	chrX:65242009-65242682		chrX:65242009-65242342;chrX:65242343-65242529	chrX:65242008-65242009;chrX:65242342-65242343		181;22	22;8	539;68	89;28	1072;152	132;42	689;78	148;49
K	intron_retention	GK	chrX	+	chrX:30745670-30746848				chrX:30745669-30745670;chrX:30746848-30746849		0;2	6;3	3;0	7;0	2;0	6;2	6;0	10;4
K	cassette	STK26	chrX	+	chrX:131202598-131205096	chrX:131202598-131203505;chrX:131203692-131205096		chrX:131203506-131203691			0;7	0;17	0;8	2;49	0;12	0;13	0;11	0;31
K	intron_retention	MTMR1	chrX	+	chrX:149931211-149932984				chrX:149931210-149931211;chrX:149932984-149932985		0;9	0;2	2;5	0;7	0;9	2;6	0;8	0;2
K	jcn_only_AA	APOO	chrX	-	chrX:23851628-23858429	chrX:23851730-23858429		chrX:23851628-23851729	chrX:23851627-23851628		3;5	13;7	7;8	14;14	5;10	18;13	3;10	18;19
K	jcn_only_AA	ZNF185	chrX	+	chrX:152088956-152089253	chrX:152088956-152089250		chrX:152089251-152089253	chrX:152089253-152089254		0;5	2;7	3;13	0;2	6;22	5;0	9;24	6;3
K	alternative_donor	ALG13	chrX	+	chrX:110924528-110925463	chrX:110924653-110925463		chrX:110924528-110924652	chrX:110924527-110924528		0;0	0;2	2;2	0;2	0;6	2;2	0;2	0;4
K	alternative_first_exon	MAGED1	chrX	+	chrX:51546214-51637364	chrX:51636852-51637364	chrX:51546103-51546213	chrX:51636629-51636851			1;2	0;1	3;2	1;1	1;3	0;0	4;3	2;1
K	jcn_only_AD	ZNF182	chrX	-	chrX:47863102-47863307	chrX:47863102-47863302		chrX:47863303-47863307	chrX:47863307-47863308		2;0	3;0	0;0	0;0	3;0	2;0	2;2	0;0
N	cassette	MED14	chrX	-	chrX:40523742-40531112	chrX:40523742-40525971;chrX:40526104-40531112		chrX:40525972-40526103			0;9	0;9	0;16	0;21	0;24	0;15	2;23	0;22
K	jcn_only_AA	RAP2C	chrX	-	chrX:131351396-131352259	chrX:131352041-131352259					0;0	2;0	0;0	0;2	0;0	0;0	0;0	2;0
N	alternative_donor	APOO	chrX	-	chrX:23899070-23925810;chrX:23899070-23901475	chrX:23899070-23901620		chrX:23901476-23901620;chrX:23901621-23925810	chrX:23901620-23901621;chrX:23925810-23925811		2;0	0;0	7;0	1;0	10;0	1;0	10;0	4;0
K	intron_retention	RBM3	chrX	+	chrX:48434056-48434202				chrX:48434055-48434056;chrX:48434202-48434203		0;11	0;2	0;9	0;6	0;9	3;5	0;9	0;9
K	cassette	TMEM164	chrX	+	chrX:109246001-109310574	chrX:109246001-109246728;chrX:109247393-109310574		chrX:109246729-109247392			3;11	0;6	6;17	3;14	5;22	0;7	9;30	5;18
K	intron_retention	TMSB4X	chrX	+	chrX:12993288-12994364				chrX:12993287-12993288;chrX:12994364-12994365		7425;28	9270;40	12680;62	10275;61	16477;51	12661;51	16186;41	19627;63
K	intron_retention	PGK1	chrX	+	chrX:77369397-77369512				chrX:77369396-77369397;chrX:77369512-77369513		201;0	486;0	335;5	238;0	713;7	614;0	603;0	705;0
N	jcn_only_AD	WAS	chrX	+	chrX:48547824-48549497	chrX:48548658-48549497		chrX:48547824-48548657	chrX:48547823-48547824		33;0	19;0	40;0	22;0	90;0	32;0	76;0	67;3
K	intron_retention	EIF2S3	chrX	+	chrX:24091381-24094838				chrX:24091380-24091381;chrX:24094838-24094839		142;10	53;3	156;9	74;10	163;13	61;3	127;14	58;6
K	intron_retention	IRAK1	chrX	-	chrX:153277369-153277979				chrX:153277368-153277369;chrX:153277979-153277980		67;0	30;0	126;2	95;2	168;0	41;0	158;0	85;0
K	intron_retention	RBMX	chrX	-	chrX:135956612-135957244				chrX:135956611-135956612;chrX:135957244-135957245		22;0	22;2	41;7	28;0	61;8	31;3	70;10	33;7
N	alternative_donor	MSN	chrX	+	chrX:64887721-64936679;chrX:64923554-64936679	chrX:64921504-64936679		chrX:64887721-64921503;chrX:64921504-64923553	chrX:64887720-64887721;chrX:64921503-64921504		338;0	232;0	623;0	715;0	778;0	599;0	822;0	708;0
N	jcn_only_AD	RRAGB	chrX	+	chrX:55778835-55779824;chrX:55778787-55779824	chrX:55777630-55779824		chrX:55777630-55778786;chrX:55778787-55778834	chrX:55777629-55777630;chrX:55778786-55778787		0;2	0;2	2;2	0;0	6;6	0;3	0;0	0;5
K	alternative_donor	FAM50A	chrX	+	chrX:153672694-153673980	chrX:153673258-153673980		chrX:153672694-153673257	chrX:153672693-153672694		26;1	13;1	50;1	24;2	45;2	20;1	67;1	35;1
K	intron_retention	RBM41	chrX	-	chrX:106308989-106310785				chrX:106308988-106308989;chrX:106310785-106310786		0;3	0;0	3;2	0;3	0;0	0;0	0;2	0;2
K	jcn_only_AA	TCEAL4	chrX	+	chrX:102841220-102841581	chrX:102841220-102841576		chrX:102841577-102841581	chrX:102841581-102841582		3;25	3;19	9;47	2;32	14;77	5;23	8;53	6;43
K	intron_retention	VSIG4	chrX	-	chrX:65252592-65253315				chrX:65252591-65252592;chrX:65253315-65253316		122;0	18;0	388;2	98;0	811;2	118;0	544;5	115;0
K	jcn_only_AA	DDX3X	chrX	+	chrX:41206266-41206567	chrX:41206266-41206564		chrX:41206565-41206567	chrX:41206567-41206568		36;82	26;78	50;106	84;191	60;93	78;144	68;116	83;174
K	alternative_last_exon	THOC2	chrX	-	chrX:122735190-122744768	chrX:122737600-122744768	chrX:122734413-122735189	chrX:122735731-122737599			8;6	7;7	8;11	8;10	12;14	6;10	10;12	8;9
K	alternative_acceptor	RPS4X	chrX	-	chrX:71493823-71494902	chrX:71494286-71494902		chrX:71493823-71494285	chrX:71493822-71493823		516;3	280;2	709;5	238;2	808;6	268;2	745;7	290;2
K	cassette	PORCN	chrX	+	chrX:48371108-48372627	chrX:48371108-48371222;chrX:48371241-48372627		chrX:48371223-48371240			0;0	0;0	0;0	0;0	0;3	2;1	2;0	0;0
K	cassette	LINC01278	chrX	-	chrX:62652372-62780711	chrX:62652372-62736789;chrX:62736963-62780711		chrX:62736790-62736962			6;2	2;0	0;3	0;2	6;3	0;1	3;5	0;1
K	cassette	TAZ	chrX	+	chrX:153641905-153647881	chrX:153641905-153642437;chrX:153642528-153647881		chrX:153642438-153642527			5;4	2;2	8;6	3;3	14;9	5;1	8;6	6;5
N	alternative_acceptor	DDX26B	chrX	+	chrX:134703357-134706739	chrX:134703357-134704360		chrX:134704361-134706739	chrX:134706739-134706740		3;5	0;3	0;3	0;4	0;2	0;4	0;2	0;4
N	intron_retention		chrX	+	chrX:48759229-48759718				chrX:48759228-48759229;chrX:48759718-48759719		7;19	5;14	7;17	7;17	6;32	3;17	7;28	3;28
K	alternative_acceptor	ZMAT1	chrX	-	chrX:101150853-101152840	chrX:101150856-101152840		chrX:101150853-101150855	chrX:101150852-101150853		0;0	0;0	0;0	0;0	0;0	0;0	0;0	2;1
K	intron_retention	BTK	chrX	-	chrX:100609683-100611039				chrX:100609682-100609683;chrX:100611039-100611040		25;5	15;0	50;2	63;8	39;6	40;2	63;3	43;6
K	intron_retention	MPP1	chrX	-	chrX:154010078-154011701				chrX:154010077-154010078;chrX:154011701-154011702		232;8	49;2	300;11	238;10	383;13	175;7	334;6	281;9
K	jcn_only_AA	CHM	chrX	-	chrX:85219058-85233770	chrX:85226591-85233770					7;0	7;0	11;0	16;0	11;3	8;0	14;5	10;0
K	cassette	NSDHL	chrX	+	chrX:151999662-152014825	chrX:151999662-152000177;chrX:152000245-152014825		chrX:152000178-152000244			3;1	2;0	16;2	6;0	11;1	9;1	18;2	7;0
K	cassette	NONO	chrX	+	chrX:70503572-70511628	chrX:70503572-70510478;chrX:70510642-70511628		chrX:70510479-70510641			0;70	0;41	0;104	0;77	2;139	0;66	0;145	0;79
K	jcn_only_AA	DIAPH2,NGFRAP1	chrX	+	chrX:102632035-102632437	chrX:102632035-102632390		chrX:102632391-102632437	chrX:102632437-102632438		36;0	8;0	39;9	0;0	75;11	16;6	57;7	11;3
K	cassette	KDM6A	chrX	+	chrX:44918712-44919853	chrX:44918712-44919266;chrX:44919402-44919853		chrX:44919267-44919401			0;1	0;4	0;5	0;15	3;6	0;9	0;9	8;6
K	cassette	MORF4L2	chrX	-	chrX:102933580-102940098;chrX:102933529-102940098	chrX:102933580-102939608,chrX:102933529-102939608;chrX:102939658-102940098		chrX:102939609-102939657			36;4	35;3	53;13	31;8	64;19	30;5	56;23	61;8
K	alternative_first_exon	STAG2	chrX	+	chrX:123094717-123155216	chrX:123095707-123155216	chrX:123094369-123094716	chrX:123095568-123095706			1;1	0;0	1;0	10;2	1;2	3;0	2;2	1;3
K	intron_retention	ARHGAP4	chrX	-	chrX:153175540-153175624				chrX:153175539-153175540;chrX:153175624-153175625		27;5	9;0	76;2	2;0	116;3	8;0	108;4	28;0
K	cassette	HDAC8	chrX	-	chrX:71708892-71715005	chrX:71708892-71710778;chrX:71710857-71715005		chrX:71710779-71710856			0;6	0;2	0;8	0;6	0;12	0;9	0;13	3;8
N	cassette	MAGT1	chrX	-	chrX:77084733-77096742	chrX:77084733-77086301;chrX:77086393-77096742		chrX:77086302-77086392			0;37	0;32	0;60	0;57	2;92	0;75	0;80	0;84
K	cassette	UPF3B	chrX	-	chrX:118972491-118975038	chrX:118972491-118974608;chrX:118974648-118975038		chrX:118974609-118974647			2;0	11;0	8;3	7;1	20;4	8;0	13;1	10;2
K	intron_retention	ARAF	chrX	+	chrX:47424539-47424650				chrX:47424538-47424539;chrX:47424650-47424651		17;0	22;0	44;0	36;0	36;2	27;0	43;0	43;5
N	cassette	IL13RA1	chrX	+	chrX:117875120-117883620	chrX:117875120-117880916;chrX:117881056-117883620		chrX:117880917-117881055			0;76	0;52	0;92	0;80	0;89	0;66	0;67	2;102
K	intron_retention	RAP2C	chrX	-	chrX:131351396-131352259				chrX:131351395-131351396;chrX:131352259-131352260		0;6	2;11	0;8	0;31	0;10	0;18	0;9	2;29
K	intron_retention	CYBB	chrX	+	chrX:37668945-37670043				chrX:37668944-37668945;chrX:37670043-37670044		216;2	153;5	635;6	225;2	784;5	278;3	642;0	342;3
K	intron_retention	THOC2	chrX	-	chrX:122753288-122754757				chrX:122753287-122753288;chrX:122754757-122754758		14;6	10;0	11;3	27;3	40;3	13;3	24;0	25;0
K	jcn_only_AD	FAM50A	chrX	+	chrX:153672694-153673980	chrX:153673258-153673980		chrX:153672694-153673257	chrX:153672693-153672694		26;2	13;0	50;0	24;0	45;0	20;0	67;0	35;0
K	intron_retention	DDX3X	chrX	+	chrX:41200870-41201747				chrX:41200869-41200870;chrX:41201747-41201748		116;5	120;0	192;0	269;11	283;0	276;6	292;0	314;4
N	intron_retention		chrX	+	chrX:23802935-23803444				chrX:23802934-23802935;chrX:23803444-23803445		0;236	0;545	0;124	0;869	0;107	2;1040	0;76	0;1102
N	intron_retention		chrX	+	chrX:48548658-48549497				chrX:48548657-48548658;chrX:48549497-48549498		0;10	0;2	0;12	0;0	0;14	0;3	0;14	3;5
K	intron_retention	MPP1	chrX	-	chrX:154019344-154020043				chrX:154019343-154019344;chrX:154020043-154020044		157;3	35;0	217;0	165;0	251;2	142;3	252;0	197;2
N	intron_retention		chrX	+	chrX:41200068-41200736				chrX:41200067-41200068;chrX:41200736-41200737		0;0	0;0	0;2	2;6	0;0	0;3	0;2	2;7
N	jcn_only_AA	VSIG4	chrX	-	chrX:65242009-65242682;chrX:65242343-65242682	chrX:65242530-65242682		chrX:65242009-65242342;chrX:65242343-65242529	chrX:65242008-65242009;chrX:65242342-65242343		123;0	22;0	420;2	90;0	869;0	125;0	531;0	145;0
K	cassette	MTMR1	chrX	+	chrX:149867774-149887096	chrX:149867774-149880813;chrX:149880838-149887096		chrX:149880814-149880837			0;4	0;3	0;3	2;4	2;1	0;0	2;4	0;3
N	cassette	MORF4L2	chrX	-	chrX:102931980-102940098	chrX:102931980-102933426;chrX:102933549-102940098		chrX:102933427-102933548			2;29	0;24	0;45	0;30	3;60	0;29	2;65	0;40
K	jcn_only_AA	WDR13	chrX	+	chrX:48456426-48457138	chrX:48456426-48457104		chrX:48457105-48457138	chrX:48457138-48457139		2;5	3;6	2;24	0;13	7;34	0;17	8;22	5;19
K	alternative_acceptor	FAM122C	chrX	+	chrX:133941739-133948800	chrX:133941739-133943216		chrX:133943217-133948800	chrX:133948800-133948801		0;0	3;1	0;0	20;2	2;1	7;1	0;1	0;1
K	cassette	FMR1	chrX	+	chrX:147019120-147022094	chrX:147019120-147019617;chrX:147019681-147022094		chrX:147019618-147019680			8;0	14;1	20;2	36;8	13;4	26;6	19;4	24;9
K	jcn_only_AA	ALG13,TAF1	chrX	+	chrX:110924653-110925463	chrX:110924653-110925359		chrX:110925360-110925463	chrX:110925463-110925464		0;0	0;0	0;5	3;6	3;9	0;7	2;6	2;7
K	alternative_acceptor	ALG13,TAF1	chrX	+	chrX:110924653-110925463	chrX:110924653-110925359		chrX:110925360-110925463	chrX:110925463-110925464		0;3	0;4	0;15	3;13	3;14	0;9	2;14	2;9
N	alternative_acceptor	MBNL3	chrX	-	chrX:131540421-131622878	chrX:131574343-131622878		chrX:131540421-131574342	chrX:131540420-131540421		2;0	0;0	2;0	0;0	0;0	0;0	0;0	0;0
K	alternative_first_exon	TCEAL1,TCEAL3	chrX	+	chrX:102883722-102884421	chrX:102883954-102884421	chrX:102883334-102883721	chrX:102883902-102883953			1;4	0;3	1;1	0;0	0;5	0;3	2;2	1;2
K	jcn_only_AD	RBM10	chrX	+	chrX:47039437-47039610	chrX:47039440-47039610		chrX:47039437-47039439	chrX:47039436-47039437		2;7	2;0	8;6	11;7	9;6	7;13	15;17	7;7
K	jcn_only_AA	RPS4X	chrX	-	chrX:71493823-71494902	chrX:71494286-71494902		chrX:71493823-71494285	chrX:71493822-71493823		516;0	280;0	709;0	238;0	808;3	268;0	745;0	290;0
N	jcn_only_AA		chrX	+	chrX:117910475-117938894	chrX:117910475-117925724		chrX:117925725-117938894	chrX:117938894-117938895		0;78	0;70	0;80	0;69	2;100	0;75	0;68	0;98
N	intron_retention		chrX	+	chrX:47056424-47058201				chrX:47056423-47056424;chrX:47058201-47058202		0;0	0;6	7;2	0;5	0;0	0;5	0;0	0;5
K	alternative_first_exon	BCAP31,ELF4	chrX	-	chrX:152988744-152989470,chrX:152988744-152989655;chrX:152988744-152989788	chrX:152988744-152988962	chrX:152989789-152990152	chrX:152988963-152989549			43;26	16;4	75;42	41;23	107;31	38;12	87;22	50;11
N	jcn_only_AA	BRWD3	chrX	-	chrX:79985520-79988954	chrX:79986711-79988954		chrX:79985520-79986710	chrX:79985519-79985520		6;0	7;0	7;0	9;0	9;0	5;2	5;0	7;0
K	jcn_only_AD	KDM5C	chrX	-	chrX:53222819-53222963	chrX:53222819-53222954		chrX:53222955-53222963	chrX:53222963-53222964		17;8	14;10	22;15	27;14	30;10	22;15	30;22	36;24
K	jcn_only_AD	TCEAL3	chrX	+	chrX:102862987-102863531	chrX:102862999-102863531		chrX:102862987-102862998	chrX:102862986-102862987		0;3	0;0	19;2	6;5	13;5	6;0	18;5	8;2
K	cassette	PDHA1	chrX	+	chrX:19371292-19373466	chrX:19371292-19372608;chrX:19372702-19373466		chrX:19372609-19372701			0;15	0;9	0;36	3;13	2;41	0;11	0;51	0;13
K	jcn_only_AD	TAF1	chrX	+	chrX:70678217-70679401	chrX:70679102-70679401					11;0	7;0	16;0	5;0	23;0	0;0	17;0	10;2
K	cassette	IRAK1	chrX	-	chrX:153278885-153281482	chrX:153278885-153279492;chrX:153279730-153281482		chrX:153279493-153279729			0;59	0;15	0;124	2;85	0;132	0;40	0;137	0;73
K	cassette	TBC1D25	chrX	+	chrX:48399831-48417284	chrX:48399831-48403256;chrX:48403412-48417284		chrX:48403257-48403411			0;5	0;4	0;10	0;17	0;6	0;7	2;8	0;12
K	coord_cassette	NONO	chrX	+	chrX:70503572-70510478	chrX:70503572-70504246;chrX:70504304-70504833;chrX:70504948-70510478		chrX:70504247-70504303;chrX:70504834-70504947			2;0	2;4	9;2	2;6	10;7	5;5	8;5	3;5
K	alternative_acceptor	FMR1,IL13RA1	chrX	+	chrX:147024847-147026424;chrX:147024847-147026463	chrX:147024847-147026388		chrX:147026389-147026424;chrX:147026425-147026463	chrX:147026424-147026425;chrX:147026463-147026464		2;4	2;5	4;5	11;21	5;12	5;15	2;10	0;21
N	alternative_acceptor	SH3BGRL	chrX	+	chrX:80458076-80532482	chrX:80458076-80492616		chrX:80492617-80532482	chrX:80532482-80532483		33;0	0;0	30;0	0;0	41;0	0;0	55;0	27;0
K	cassette	SMC1A	chrX	-	chrX:53407652-53409152	chrX:53407652-53407938;chrX:53408009-53409152		chrX:53407939-53408008			0;24	0;19	2;51	0;32	0;99	0;30	0;96	0;35
N	jcn_only_AA	ZNF75D	chrX	-	chrX:134425490-134426206	chrX:134425554-134426206		chrX:134425490-134425553	chrX:134425489-134425490		5;0	0;0	2;0	6;3	3;7	0;0	0;0	5;0
N	jcn_only_AD	MSN	chrX	+	chrX:64921504-64936679;chrX:64887721-64936679	chrX:64923554-64936679		chrX:64887721-64921503;chrX:64921504-64923553	chrX:64887720-64887721;chrX:64921503-64921504		338;0	232;0	623;0	715;0	778;9	599;0	824;0	708;13
K	intron_retention	UXT	chrX	-	chrX:47511544-47516581				chrX:47511543-47511544;chrX:47516581-47516582		55;0	36;0	80;0	91;0	109;0	48;0	107;2	78;2
N	jcn_only_AA	IDS	chrX	-	chrX:148584976-148585686	chrX:148585020-148585686		chrX:148584976-148585019	chrX:148584975-148584976		2;52	0;38	2;70	8;66	0;53	0;88	0;49	5;114
K	alternative_acceptor	APOO	chrX	-	chrX:23851628-23858429	chrX:23851730-23858429		chrX:23851628-23851729	chrX:23851627-23851628		3;4	13;9	7;6	14;18	5;9	18;17	3;5	18;17
N	intron_retention		chrX	-	chrX:102933549-102940098				chrX:102933548-102933549;chrX:102940098-102940099		2;0	2;2	5;9	3;10	2;15	0;10	5;14	0;7
K	cassette	TRMT2B	chrX	-	chrX:100297302-100306632	chrX:100297302-100306239;chrX:100306356-100306632		chrX:100306240-100306355			0;2	0;1	0;2	2;2	0;3	0;2	2;3	0;3
K	alternative_acceptor	OGT,TCEAL4	chrX	+	chrX:70753187-70756057	chrX:70753187-70756027		chrX:70756028-70756057	chrX:70756057-70756058		3;17	0;8	0;19	0;9	0;13	0;3	0;15	6;11
K	cassette	APOO	chrX	-	chrX:23886806-23897031	chrX:23886806-23892519;chrX:23892575-23897031		chrX:23892520-23892574			0;4	3;15	0;13	2;28	0;13	0;17	0;11	0;22
K	intron_retention	SAT1	chrX	+	chrX:23802001-23803444				chrX:23802000-23802001;chrX:23803444-23803445		325;241	520;605	203;143	866;943	247;92	1453;920	189;72	1307;1236
K	cassette	MORF4L2	chrX	-	chrX:102931980-102940098	chrX:102931980-102933426;chrX:102933580-102940098		chrX:102933427-102933579			2;30	0;24	0;49	0;33	3;65	0;34	2;70	0;46
K	intron_retention	ACOT9	chrX	-	chrX:23724857-23725993				chrX:23724856-23724857;chrX:23725993-23725994		17;2	25;3	26;0	152;20	33;2	94;15	33;3	118;16
K	alternative_donor	CXorf40A	chrX	+	chrX:148623612-148626913	chrX:148623631-148626913		chrX:148623612-148623630	chrX:148623611-148623612		0;0	0;2	3;2	5;5	5;7	0;2	2;5	2;2
K	intron_retention	IRAK1	chrX	-	chrX:153281549-153281887				chrX:153281548-153281549;chrX:153281887-153281888		67;0	15;0	132;2	88;6	220;3	61;0	217;5	123;3
N	alternative_donor	SLC9A6	chrX	+	chrX:135065949-135067761	chrX:135067637-135067761		chrX:135065949-135067636	chrX:135065948-135065949		0;0	0;0	0;0	0;0	0;0	0;0	2;0	0;0
K	intron_retention	RAP2C	chrX	-	chrX:131352370-131353397				chrX:131352369-131352370;chrX:131353397-131353398		0;0	3;0	2;0	7;2	0;0	5;0	2;0	8;3
N	jcn_only_AA	GRIPAP1	chrX	-	chrX:48831704-48832429	chrX:48831722-48832429		chrX:48831704-48831721	chrX:48831703-48831704		0;13	0;15	0;18	0;51	0;20	0;40	0;20	2;63
K	intron_retention	ARMCX5,ARMCX5-GPRASP2	chrX	+	chrX:101854501-101854633				chrX:101854500-101854501;chrX:101854633-101854634		0;0	0;2	2;5	0;3	5;6	2;2	0;8	0;2
K	alternative_first_exon	SH3KBP1	chrX	-	chrX:19663594-19701940	chrX:19663594-19688979	chrX:19701941-19702146	chrX:19688980-19689116			49;0	18;0	96;0	54;17	119;0	47;2	86;0	68;3
K	jcn_only_AA	ARMCX3	chrX	+	chrX:100878267-100878803	chrX:100878267-100878775		chrX:100878776-100878803	chrX:100878803-100878804		10;0	9;2	24;0	26;8	30;5	26;0	20;6	26;5
K	intron_retention	DDX3X	chrX	+	chrX:41203076-41203282				chrX:41203075-41203076;chrX:41203282-41203283		89;0	84;2	159;0	247;5	178;2	184;2	180;0	276;2
K	intron_retention	PDHA1	chrX	+	chrX:19371292-19373466				chrX:19371291-19371292;chrX:19373466-19373467		0;3	0;0	0;0	3;0	2;3	0;0	0;0	0;0
N	alternative_donor	OCRL	chrX	+	chrX:128682579-128691301	chrX:128688424-128691301		chrX:128682579-128688423	chrX:128682578-128682579		2;0	7;0	9;0	14;0	11;1	2;0	9;1	10;0
K	intron_retention	PGK1	chrX	+	chrX:77378447-77378691				chrX:77378446-77378447;chrX:77378691-77378692		272;0	706;0	474;0	338;0	993;2	853;2	884;0	1097;0
K	jcn_only_AD	HCCS	chrX	+	chrX:11129581-11130138	chrX:11129639-11130138		chrX:11129581-11129638	chrX:11129580-11129581		0;11	0;2	0;20	0;16	2;20	0;7	0;19	0;11
K	jcn_only_AA	FAM58A	chrX	-	chrX:152853853-152857963	chrX:152853913-152857963		chrX:152853853-152853912	chrX:152853852-152853853		3;5	0;2	11;5	2;8	6;13	3;2	6;14	6;7
K	jcn_only_AD	ACSL4,AP1S2	chrX	-	chrX:15849692-15863501	chrX:15849692-15851566					0;0	0;3	11;0	7;0	6;0	0;0	5;0	0;0
K	cassette	ZNF185	chrX	+	chrX:152101516-152106617	chrX:152101516-152104961;chrX:152105058-152106617		chrX:152104962-152105057			5;2	2;0	16;3	6;0	9;2	0;0	22;1	7;2
N	cassette	CYBB	chrX	+	chrX:37651313-37655203	chrX:37651313-37652917;chrX:37653064-37655203		chrX:37652918-37653063			0;245	0;159	2;586	3;204	0;692	0;200	0;590	0;313
K	intron_retention	ELK1	chrX	-	chrX:47496452-47498677				chrX:47496451-47496452;chrX:47498677-47498678		0;6	2;8	3;15	11;32	2;18	5;23	7;15	9;40
N	alternative_donor	GPR34	chrX	+	chrX:41549089-41554807	chrX:41551990-41554807		chrX:41549089-41551989	chrX:41549088-41549089		72;2	0;0	98;2	0;0	201;4	0;0	181;3	0;0
K	jcn_only_AD	GLA,GRIPAP1	chrX	-	chrX:100653935-100655653	chrX:100653935-100654731					61;0	56;0	144;0	131;0	148;3	100;2	133;0	142;0
N	jcn_only_AA	AIFM1	chrX	-	chrX:129264078-129265649	chrX:129264142-129265649		chrX:129264078-129264141	chrX:129264077-129264078		0;36	0;15	0;64	0;17	2;80	0;19	0;80	0;24
K	jcn_only_AD	PIGA	chrX	-	chrX:15344169-15349711	chrX:15344169-15349337		chrX:15349338-15349711	chrX:15349711-15349712		2;2	0;0	0;6	0;3	0;0	2;0	2;5	0;0
K	intron_retention	RPL10	chrX	+	chrX:153628283-153628804				chrX:153628282-153628283;chrX:153628804-153628805		595;12	395;13	777;10	284;19	939;20	301;9	777;20	464;11
K	jcn_only_AA	GRIPAP1	chrX	-	chrX:48847515-48853661	chrX:48849991-48853661					0;10	0;20	2;28	0;66	0;32	0;47	0;25	0;55
K	cassette	SNX12	chrX	-	chrX:70280969-70282703	chrX:70280969-70281692;chrX:70281818-70282703		chrX:70281693-70281817			0;21	0;14	0;47	2;22	0;55	0;16	0;63	0;26
K	cassette	PBDC1	chrX	+	chrX:75395449-75397450	chrX:75395449-75396715;chrX:75396828-75397450		chrX:75396716-75396827			0;34	0;20	0;46	0;42	2;58	0;29	2;55	0;41
N	jcn_only_AA	ACSL4	chrX	-	chrX:108926602-108939372	chrX:108926605-108939372		chrX:108926602-108926604	chrX:108926601-108926602		5;0	30;17	6;0	33;0	7;0	23;0	11;0	22;0
N	alternative_acceptor	VSIG4	chrX	-	chrX:65242009-65242682;chrX:65242343-65242682	chrX:65242530-65242682		chrX:65242009-65242342;chrX:65242343-65242529	chrX:65242008-65242009;chrX:65242342-65242343		198;5	29;1	587;20	116;1	1193;31	170;4	748;19	194;3
N	alternative_donor	DDX26B	chrX	+	chrX:134703357-134706739	chrX:134704472-134706739		chrX:134703357-134704471	chrX:134703356-134703357		3;3	0;2	0;2	0;4	0;3	0;3	0;2	0;2
K	intron_retention	MSN	chrX	+	chrX:64949575-64950968				chrX:64949574-64949575;chrX:64950968-64950969		236;0	205;0	482;0	602;2	644;0	447;0	614;0	534;2
K	cassette	GK	chrX	+	chrX:30742299-30746848	chrX:30742299-30745582;chrX:30745670-30746848		chrX:30745583-30745669			15;1	92;7	25;2	78;9	18;1	113;4	15;5	177;11
K	intron_retention	TMSB4X	chrX	+	chrX:12994481-12994895				chrX:12994480-12994481;chrX:12994895-12994896		7950;8	9576;15	10517;13	8602;11	14355;12	11148;11	12857;8	15767;16
N	jcn_only_AD	STS	chrX	+	chrX:7109050-7171236	chrX:7137728-7171236		chrX:7109050-7137727	chrX:7109049-7109050		0;0	0;0	0;0	0;0	9;8	0;0	0;2	0;0
K	intron_retention	ARMCX3	chrX	+	chrX:100878267-100878775				chrX:100878266-100878267;chrX:100878775-100878776		0;0	2;0	0;0	8;4	5;2	0;0	6;5	5;0
K	intron_retention	UBE2A	chrX	+	chrX:118709364-118715469				chrX:118709363-118709364;chrX:118715469-118715470		26;0	24;0	57;0	91;5	73;2	63;3	84;0	73;2
K	cassette	APEX2	chrX	+	chrX:55028063-55029394	chrX:55028063-55028683;chrX:55028865-55029394		chrX:55028684-55028864			2;10	0;8	0;11	0;17	0;20	0;14	0;19	2;23
K	jcn_only_AA	FAM122B	chrX	-	chrX:133905385-133915850	chrX:133906314-133915850		chrX:133905385-133906313	chrX:133905384-133905385		0;3	2;8	5;9	0;7	0;17	2;6	0;16	5;10
K	jcn_only_AA	KDM5C	chrX	-	chrX:53250099-53253921	chrX:53250976-53253921		chrX:53250099-53250975	chrX:53250098-53250099		22;0	15;0	33;0	31;0	47;0	27;6	26;0	63;0
N	jcn_only_AA	RAP2C	chrX	-	chrX:131339616-131348161	chrX:131347984-131348161		chrX:131339616-131347983	chrX:131339615-131339616		41;0	63;0	38;0	122;2	60;0	78;0	36;0	133;0
K	intron_retention	ARMCX3	chrX	+	chrX:100878421-100878775				chrX:100878420-100878421;chrX:100878775-100878776		0;0	0;0	0;0	0;0	0;2	0;0	0;2	6;0
K	alternative_donor	TAZ	chrX	+	chrX:153641590-153641818	chrX:153641696-153641818		chrX:153641590-153641695	chrX:153641589-153641590		0;2	6;1	15;4	5;2	13;6	8;0	17;3	7;3
K	intron_retention	UBA1	chrX	+	chrX:47053424-47058201				chrX:47053423-47053424;chrX:47058201-47058202		51;0	86;5	115;3	175;3	120;0	118;2	110;0	141;2
K	jcn_only_AA	PHF6	chrX	+	chrX:133527983-133547520	chrX:133527983-133547517		chrX:133547518-133547520	chrX:133547520-133547521		6;2	7;2	7;3	10;5	23;5	0;0	11;2	17;3
N	coord_cassette	REPS2	chrX	+	chrX:17088117-17121840	chrX:17088117-17092236;chrX:17092283-17095393;chrX:17095531-17121840		chrX:17092237-17092282;chrX:17095394-17095530			0;1	0;0	0;0	0;0	5;1	0;0	7;2	0;0
K	alternative_acceptor	BCOR	chrX	-	chrX:39923104-39923588	chrX:39923206-39923588		chrX:39923104-39923205	chrX:39923103-39923104		2;1	10;1	5;2	5;2	8;1	3;1	11;2	2;2
K	intron_retention	MPP1	chrX	-	chrX:154011783-154012302				chrX:154011782-154011783;chrX:154012302-154012303		203;11	55;0	245;5	167;4	399;9	190;5	306;5	249;6
N	jcn_only_AD	GPR34	chrX	+	chrX:41549089-41554807	chrX:41551990-41554807		chrX:41549089-41551989	chrX:41549088-41549089		72;0	0;0	98;2	0;0	201;3	0;0	181;6	0;0
K	coord_cassette	SMS	chrX	+	chrX:21985435-21995178	chrX:21985435-21990014;chrX:21990109-21990624;chrX:21990690-21995178		chrX:21990015-21990108;chrX:21990625-21990689			0;102	0;66	2;171	0;110	0;234	0;80	0;199	0;115
N	alternative_acceptor	PHKA2	chrX	-	chrX:18954269-18956744	chrX:18954320-18956744		chrX:18954269-18954319	chrX:18954268-18954269		9;0	0;1	6;0	3;0	19;0	6;0	9;0	7;0
K	cassette	THOC2	chrX	-	chrX:122757135-122757637	chrX:122757135-122757494;chrX:122757561-122757637		chrX:122757495-122757560			6;0	6;0	14;0	10;2	13;4	10;1	10;0	8;1
K	intron_retention	FAM50A	chrX	+	chrX:153677303-153677568				chrX:153677302-153677303;chrX:153677568-153677569		57;0	42;0	97;2	48;0	139;5	41;0	127;0	50;0
N	jcn_only_AA	VSIG4	chrX	-	chrX:65242530-65242682;chrX:65242343-65242682	chrX:65242009-65242682		chrX:65242009-65242342;chrX:65242343-65242529	chrX:65242008-65242009;chrX:65242342-65242343		101;22	14;8	355;68	61;28	717;152	83;42	452;78	97;49
K	alternative_first_exon	MECP2	chrX	-	chrX:153298009-153357641;chrX:153298009-153363060	chrX:153298009-153305242	chrX:153357642-153357765;chrX:153363061-153363221	chrX:153305243-153305354			14;1	10;1	18;0	28;6	20;0	19;1	15;0	23;3
K	alternative_donor	PQBP1	chrX	+	chrX:48755377-48755774;chrX:48755298-48755774	chrX:48755366-48755774		chrX:48755298-48755365;chrX:48755366-48755376	chrX:48755297-48755298;chrX:48755365-48755366		0;7	3;5	6;13	6;11	5;18	2;15	7;20	4;9
K	intron_retention	IDH3G	chrX	-	chrX:153051429-153051666				chrX:153051428-153051429;chrX:153051666-153051667		13;0	14;0	41;5	28;3	52;2	30;2	51;0	30;5
N	jcn_only_AA	STARD8	chrX	+	chrX:67936274-67937053	chrX:67936274-67937041		chrX:67937042-67937053	chrX:67937053-67937054		8;3	3;0	9;0	3;0	19;2	3;0	14;0	0;0
K	alternative_acceptor	ALG13	chrX	+	chrX:110924528-110925463	chrX:110924528-110925359		chrX:110925360-110925463	chrX:110925463-110925464		0;4	0;4	2;16	0;14	0;14	2;9	0;18	0;8
N	jcn_only_AA		chrX	-	chrX:5637914-5643970	chrX:5642329-5643970					0;0	0;0	73;9	9;0	67;0	0;0	55;5	2;0
K	intron_retention	GK	chrX	+	chrX:30714801-30715848				chrX:30714800-30714801;chrX:30715848-30715849		0;0	5;12	2;0	6;5	0;0	15;6	0;0	17;12
K	intron_retention	OGT	chrX	+	chrX:70764486-70767756				chrX:70764485-70764486;chrX:70767756-70767757		19;22	9;2	13;9	15;4	25;8	10;0	16;13	18;0
K	jcn_only_AD	AP1S2,CXorf23	chrX	-	chrX:19954017-19955622	chrX:19954017-19955535		chrX:19955536-19955622	chrX:19955622-19955623		2;0	0;0	0;0	0;0	0;3	3;0	0;0	0;0
K	intron_retention	FOXO4	chrX	+	chrX:70316550-70316714				chrX:70316549-70316550;chrX:70316714-70316715		0;4	0;2	2;2	0;3	2;3	0;3	0;6	2;3
K	intron_retention	FAM50A	chrX	+	chrX:153678084-153678230				chrX:153678083-153678084;chrX:153678230-153678231		53;7	39;3	111;6	50;5	130;4	36;0	119;6	72;4
K	cassette	CASK	chrX	-	chrX:41414889-41419031	chrX:41414889-41416284;chrX:41416354-41419031		chrX:41416285-41416353			5;0	3;1	0;0	5;1	2;1	3;1	3;0	0;2
K	alternative_first_exon	ENOX2	chrX	-	chrX:129837229-129917520	chrX:129837229-129843216	chrX:129917521-129917664	chrX:129843217-129843305			7;0	0;0	6;2	3;1	5;1	2;1	6;1	1;2
N	alternative_donor	APOO	chrX	-	chrX:23899070-23901475;chrX:23899070-23901620	chrX:23899070-23925810		chrX:23901476-23901620;chrX:23901621-23925810	chrX:23901620-23901621;chrX:23925810-23925811		0;2	0;0	0;7	1;0	0;10	1;0	0;10	1;3
N	intron_retention		chrX	-	chrX:133927888-133931150				chrX:133927887-133927888;chrX:133931150-133931151		0;0	0;2	0;2	2;4	1;9	0;6	0;10	3;3
K	cassette	OFD1	chrX	+	chrX:13767653-13771486	chrX:13767653-13769367;chrX:13769488-13771486		chrX:13769368-13769487			2;1	0;1	0;5	0;3	0;4	2;2	0;4	0;2
K	intron_retention	SAT1	chrX	+	chrX:23803678-23803802				chrX:23803677-23803678;chrX:23803802-23803803		842;3	1605;17	575;5	2742;38	528;3	3532;36	341;3	3556;44
K	jcn_only_AA	ALG13	chrX	+	chrX:110924528-110925463	chrX:110924528-110925359		chrX:110925360-110925463	chrX:110925463-110925464		0;5	0;0	2;6	0;9	0;10	2;6	0;18	0;5
K	cassette	SAT1	chrX	+	chrX:23802001-23803444	chrX:23802001-23802410;chrX:23802521-23803444		chrX:23802411-23802520			325;150	520;371	203;99	866;591	247;66	1453;564	189;45	1307;632
N	cassette	PIN4	chrX	+	chrX:71401679-71416634	chrX:71401679-71406310;chrX:71406385-71416634		chrX:71406311-71406384			0;13	0;7	0;21	0;10	0;41	0;11	8;23	2;17
K	cassette	DOCK11	chrX	+	chrX:117749675-117752512	chrX:117749675-117750164;chrX:117750204-117752512		chrX:117750165-117750203			16;0	9;0	13;3	6;4	26;10	10;2	17;5	13;7
K	intron_retention	MECP2	chrX	-	chrX:153296738-153296846				chrX:153296737-153296738;chrX:153296846-153296847		0;11	0;14	0;26	0;48	0;18	0;20	0;14	6;39
K	intron_retention	GRIPAP1	chrX	-	chrX:48831722-48832429				chrX:48831721-48831722;chrX:48832429-48832430		13;0	15;0	18;3	51;7	20;4	40;2	20;0	63;2
K	cassette	MOSPD1	chrX	-	chrX:134023223-134030846	chrX:134023223-134025508;chrX:134025671-134030846		chrX:134025509-134025670			5;8	0;2	0;2	2;3	10;7	0;4	7;9	0;4
K	alternative_acceptor	PQBP1,REPS2	chrX	+	chrX:17040395-17043184	chrX:17040395-17043181		chrX:17043182-17043184	chrX:17043184-17043185		0;1	0;0	0;0	0;0	5;1	0;0	5;1	0;0
K	alternative_donor	TCEAL4	chrX	+	chrX:102840553-102841146	chrX:102840612-102841146		chrX:102840553-102840611	chrX:102840552-102840553		16;0	9;0	38;0	19;0	34;1	17;0	39;1	18;1
N	intron_retention		chrX	+	chrX:48759795-48760011				chrX:48759794-48759795;chrX:48760011-48760012		0;0	0;0	2;0	0;0	0;2	0;0	0;2	0;0
N	alternative_donor	RRAGB	chrX	+	chrX:55778835-55779824;chrX:55778787-55779824	chrX:55777630-55779824		chrX:55777630-55778786;chrX:55778787-55778834	chrX:55777629-55777630;chrX:55778786-55778787		0;2	0;2	0;2	0;0	0;6	0;3	0;0	0;5
N	alternative_acceptor	CA5BP1	chrX	+	chrX:102612090-102612545	chrX:102612090-102612542		chrX:102612543-102612545	chrX:102612545-102612546		0;13	0;9	0;30	0;27	2;36	0;14	2;26	0;24
N	jcn_only_AD	KDM6A	chrX	+	chrX:44923063-44928823	chrX:44928289-44928823		chrX:44923063-44928288	chrX:44923062-44923063		10;0	9;0	17;0	20;10	14;0	23;0	13;0	26;11
K	jcn_only_AA	FTSJ1,GPR34	chrX	+	chrX:41549089-41554880	chrX:41549089-41554807		chrX:41554808-41554880	chrX:41554880-41554881		0;72	0;0	0;98	0;0	25;201	0;0	16;181	0;0
N	jcn_only_AD	APOO	chrX	-	chrX:23899070-23901475;chrX:23899070-23901620	chrX:23899070-23925810		chrX:23901476-23901620;chrX:23901621-23925810	chrX:23901620-23901621;chrX:23925810-23925811		0;2	2;0	0;7	20;0	0;10	20;0	0;10	0;3
K	jcn_only_AD	TAZ	chrX	+	chrX:153641590-153641818	chrX:153641696-153641818		chrX:153641590-153641695	chrX:153641589-153641590		0;0	6;0	15;2	5;0	13;6	8;0	17;2	7;2
K	cassette	ZNF185	chrX	+	chrX:152087626-152089250	chrX:152087626-152088871;chrX:152088956-152089250		chrX:152088872-152088955			2;4	0;5	3;10	0;2	0;13	0;1	0;25	0;7
N	alternative_acceptor	STARD8	chrX	+	chrX:67936274-67937053	chrX:67936274-67937041		chrX:67937042-67937053	chrX:67937053-67937054		8;2	3;0	9;0	3;0	19;1	3;0	14;0	0;0
K	cassette	OCRL	chrX	+	chrX:128710530-128720978	chrX:128710530-128718320;chrX:128718345-128720978		chrX:128718321-128718344			2;2	2;0	6;1	6;0	10;0	6;0	7;4	11;1
K	alternative_donor	RBMX	chrX	-	chrX:135954505-135957244	chrX:135954505-135955404		chrX:135955405-135957244	chrX:135957244-135957245		0;32	2;25	0;40	0;23	3;69	2;27	0;68	0;35
K	alternative_first_exon	CDK16	chrX	+	chrX:47078064-47082950;chrX:47081742-47082950	chrX:47078505-47082950	chrX:47077632-47078063;chrX:47081660-47081741	chrX:47078087-47078504			1;4	13;5	6;19	3;7	6;16	6;8	4;12	11;11
K	intron_retention	CYBB	chrX	+	chrX:37664422-37665639				chrX:37664421-37664422;chrX:37665639-37665640		277;6	186;2	838;3	269;2	970;7	340;6	813;2	431;3
K	alternative_acceptor	LONRF3,TAF1	chrX	+	chrX:70595137-70596862	chrX:70595137-70596799		chrX:70596800-70596862	chrX:70596862-70596863		0;4	3;3	0;4	0;5	0;6	2;3	3;7	0;4
K	jcn_only_AD	HSD17B10,ZNF182	chrX	-	chrX:53458543-53458772	chrX:53458543-53458745		chrX:53458746-53458772	chrX:53458772-53458773	chrX:53458211-53458542	0;16	0;7	6;67	0;18	0;58	0;11	2;57	0;13
K	intron_retention	FLNA	chrX	-	chrX:153582096-153582282				chrX:153582095-153582096;chrX:153582282-153582283		344;0	106;0	634;3	583;2	482;0	320;0	524;0	448;0
K	jcn_only_AA	FTSJ1,WBP5	chrX	+	chrX:48340104-48340796	chrX:48340104-48340790		chrX:48340791-48340796	chrX:48340796-48340797		3;7	0;2	5;25	0;7	5;23	0;3	7;16	2;10
K	cassette	WDR44	chrX	+	chrX:117512416-117526594	chrX:117512416-117521302;chrX:117521378-117526594		chrX:117521303-117521377			0;8	0;3	0;8	0;9	0;10	0;8	1;8	0;11
K	intron_retention	DDX3X	chrX	+	chrX:41198337-41200736				chrX:41198336-41198337;chrX:41200736-41200737		169;2	147;0	195;2	267;10	235;0	255;0	218;2	311;6
K	cassette	PHF8	chrX	-	chrX:54019273-54022125	chrX:54019273-54020033;chrX:54020337-54022125		chrX:54020034-54020336			2;5	3;6	8;7	5;13	2;8	7;12	6;8	7;16
N	alternative_donor	FAM58A	chrX	-	chrX:5637914-5643970	chrX:5637914-5642106		chrX:5642107-5643970	chrX:5643970-5643971		0;0	0;0	73;4	9;1	67;3	0;0	55;3	2;0
N	jcn_only_AA	ELF4	chrX	-	chrX:129208728-129244299	chrX:129215514-129244299					0;2	0;13	0;10	0;34	0;11	5;19	0;9	0;10
K	alternative_acceptor	WDR13	chrX	+	chrX:48456426-48457138	chrX:48456426-48457104		chrX:48457105-48457138	chrX:48457138-48457139		2;5	3;4	2;19	0;10	7;19	0;11	8;17	5;12
N	alternative_acceptor		chrX	+	chrX:117910475-117938894	chrX:117910475-117925724		chrX:117925725-117938894	chrX:117938894-117938895		0;21	0;11	0;24	0;10	2;22	0;12	0;17	0;16
N	cassette	ACSL4	chrX	-	chrX:108926605-108976367	chrX:108926605-108939372;chrX:108939426-108976367		chrX:108939373-108939425			0;11	0;44	0;13	17;41	0;13	0;22	0;14	11;32
K	alternative_first_exon	MECP2	chrX	-	chrX:153298009-153305242;chrX:153298009-153363060	chrX:153298009-153357641	chrX:153305243-153305354;chrX:153363061-153363221	chrX:153357642-153357765			1;14	1;10	3;15	8;26	1;19	1;19	0;15	3;23
K	cassette	STAG2	chrX	+	chrX:123224615-123227867	chrX:123224615-123224703;chrX:123224815-123227867		chrX:123224704-123224814			35;11	30;8	38;8	44;18	40;11	52;16	44;9	65;15
K	jcn_only_AD	NAA10	chrX	-	chrX:153198038-153199413	chrX:153198038-153199395		chrX:153199396-153199413	chrX:153199413-153199414		0;23	0;9	1;43	0;11	0;39	0;5	0;48	0;31
N	alternative_acceptor		chrX	+	chrX:75396828-75397523	chrX:75396828-75397450		chrX:75397451-75397523	chrX:75397523-75397524		0;37	0;24	2;41	0;37	0;62	0;28	0;52	0;31
K	alternative_last_exon	RBMX	chrX	-	chrX:135954505-135957244	chrX:135956612-135957244	chrX:135954427-135954504	chrX:135955620-135956611			2;54	5;41	2;68	0;39	5;120	4;46	2;119	2;61
K	cassette	GK	chrX	+	chrX:30671733-30695491	chrX:30671733-30683627;chrX:30683702-30695491		chrX:30683628-30683701			0;7	0;41	0;10	0;33	0;5	0;31	0;3	3;66
N	alternative_acceptor	SLC38A5	chrX	-	chrX:48317151-48317921	chrX:48317421-48317921		chrX:48317151-48317420	chrX:48317150-48317151		0;0	0;13	0;7	13;139	0;5	5;83	0;6	0;74
K	cassette	ARHGAP4	chrX	-	chrX:153184738-153186079	chrX:153184738-153185020;chrX:153185141-153186079		chrX:153185021-153185140			25;4	2;1	53;3	0;0	123;9	19;1	111;6	24;0
K	cassette	RPL10	chrX	+	chrX:153628283-153629042	chrX:153628283-153628804;chrX:153628968-153629042		chrX:153628805-153628967			5;966	8;536	13;1099	10;408	6;1300	6;441	0;1145	8;624
K	alternative_donor	PQBP1	chrX	+	chrX:48755377-48755774;chrX:48755366-48755774	chrX:48755298-48755774		chrX:48755298-48755365;chrX:48755366-48755376	chrX:48755297-48755298;chrX:48755365-48755366		7;0	6;2	16;3	12;5	21;2	15;2	21;6	10;3
N	alternative_acceptor	ENOX2	chrX	-	chrX:129771379-129790554	chrX:129771385-129790554		chrX:129771379-129771384	chrX:129771378-129771379		0;2	0;2	3;3	2;3	0;4	0;0	2;5	0;2
K	intron_retention	NONO	chrX	+	chrX:70517312-70517685				chrX:70517311-70517312;chrX:70517685-70517686		139;3	89;0	115;0	100;0	243;2	117;0	223;2	145;2
K	intron_retention	SSR4	chrX	+	chrX:153059790-153060128				chrX:153059789-153059790;chrX:153060128-153060129		0;13	0;10	0;26	0;17	0;23	0;20	2;30	0;14
K	alternative_first_exon	MECP2	chrX	-	chrX:153298009-153357641;chrX:153298009-153305242	chrX:153298009-153363060	chrX:153357642-153357765;chrX:153305243-153305354	chrX:153363061-153363221			15;0	11;0	15;3	32;2	19;1	20;0	15;0	26;0
K	intron_retention	RBM3	chrX	+	chrX:48433672-48433948				chrX:48433671-48433672;chrX:48433948-48433949		116;0	72;0	205;0	107;2	283;2	63;2	242;0	85;0
K	intron_retention	CYBB	chrX	+	chrX:37655395-37658207				chrX:37655394-37655395;chrX:37658207-37658208		272;7	195;2	697;5	274;0	894;15	266;2	726;5	434;5
K	intron_retention	RAP2C	chrX	-	chrX:131351185-131351305				chrX:131351184-131351185;chrX:131351305-131351306		6;7	0;14	5;16	30;60	2;18	13;28	6;16	24;45
K	jcn_only_AA	GAB3	chrX	-	chrX:153941699-153944300	chrX:153941702-153944300		chrX:153941699-153941701	chrX:153941698-153941699		0;5	0;0	5;6	3;0	0;5	3;5	0;8	2;5
K	jcn_only_AA	SCML1	chrX	+	chrX:17755801-17764137;chrX:17755801-17764134	chrX:17755801-17762190					0;0	0;0	11;0	2;0	5;5	0;0	13;2	2;0
K	intron_retention	CYBB	chrX	+	chrX:37642854-37651227				chrX:37642853-37642854;chrX:37651227-37651228		210;2	149;2	553;6	176;0	619;5	197;0	515;2	335;7
K	intron_retention	VSIG4	chrX	-	chrX:65242009-65242682				chrX:65242008-65242009;chrX:65242682-65242683		22;85	8;7	68;216	28;41	152;466	42;53	78;300	49;73
K	cassette	UBE2A	chrX	+	chrX:118709364-118716550	chrX:118709364-118715469;chrX:118715560-118716550		chrX:118715470-118715559			1;28	0;24	5;59	5;82	0;69	1;57	6;79	6;76
N	jcn_only_AD	APOO	chrX	-	chrX:23899070-23925810;chrX:23899070-23901475	chrX:23899070-23901620		chrX:23901476-23901620;chrX:23901621-23925810	chrX:23901620-23901621;chrX:23925810-23925811		2;0	0;2	7;0	18;2	10;0	17;3	10;0	3;0
K	alternative_first_exon	FAM122C	chrX	+	chrX:133938277-133941569	chrX:133941372-133941569	chrX:133938131-133938276	chrX:133941205-133941371			0;1	0;1	0;1	0;4	1;0	2;5	0;1	0;2
K	intron_retention	HDAC6	chrX	+	chrX:48673459-48673790				chrX:48673458-48673459;chrX:48673790-48673791		5;0	10;2	8;2	13;5	13;6	17;2	7;4	22;5
K	jcn_only_AA	MECP2	chrX	-	chrX:153298009-153363060	chrX:153357766-153363060					0;6	0;6	5;9	3;19	0;5	0;7	0;11	0;28
K	alternative_donor	TCEAL1	chrX	+	chrX:102884490-102884812	chrX:102884502-102884812		chrX:102884490-102884501	chrX:102884489-102884490		5;0	7;0	8;2	0;0	10;4	8;1	11;1	2;2
K	jcn_only_AA	IQSEC2	chrX	-	chrX:53285244-53308745	chrX:53296247-53308745					0;6	0;0	0;10	5;13	0;5	2;3	0;3	0;9
N	jcn_only_AA	SLC38A5	chrX	-	chrX:48317151-48317921	chrX:48317421-48317921		chrX:48317151-48317420	chrX:48317150-48317151		0;0	0;6	0;5	13;128	0;6	5;81	0;7	0;72
K	jcn_only_AA	BCOR	chrX	-	chrX:39923104-39923588	chrX:39923206-39923588		chrX:39923104-39923205	chrX:39923103-39923104		2;0	10;0	5;3	5;5	8;0	3;3	11;0	2;5
K	cassette	DMD	chrX	-	chrX:31140048-31152218	chrX:31140048-31144758;chrX:31144791-31152218		chrX:31144759-31144790			0;0	0;0	0;0	0;0	0;1	0;0	0;3	2;3
N	intron_retention		chrX	+	chrX:134704472-134706739				chrX:134704471-134704472;chrX:134706739-134706740		0;0	5;2	0;0	0;5	5;0	6;0	2;0	6;0
K	alternative_donor	AP1S2,CXorf23	chrX	-	chrX:19954017-19955622	chrX:19954017-19955535		chrX:19955536-19955622	chrX:19955622-19955623		2;0	0;0	0;0	0;0	0;1	3;1	0;2	0;0
K	intron_retention	FLNA	chrX	-	chrX:153580065-153580251				chrX:153580064-153580065;chrX:153580251-153580252		308;0	128;0	697;5	644;10	590;2	375;2	569;2	455;2
K	coord_cassette	ZNF185	chrX	+	chrX:152090801-152100215	chrX:152090801-152091263;chrX:152091354-152097118;chrX:152097206-152100215		chrX:152091264-152091353;chrX:152097119-152097205			3;2	0;0	6;4	3;0	6;4	0;1	19;7	2;3
K	intron_retention	RENBP	chrX	-	chrX:153201030-153201456				chrX:153201029-153201030;chrX:153201456-153201457		0;0	0;0	0;2	0;0	0;0	0;0	2;0	0;2
K	intron_retention	ARHGAP4	chrX	-	chrX:153175859-153175959				chrX:153175858-153175859;chrX:153175959-153175960		25;8	8;2	43;10	5;0	135;17	16;2	102;14	17;0
K	jcn_only_AA	TFE3	chrX	-	chrX:48896871-48897981	chrX:48896936-48897981		chrX:48896871-48896935	chrX:48896870-48896871		0;26	0;35	32;67	27;63	19;70	0;59	20;94	39;78
K	intron_retention	FLNA	chrX	-	chrX:153585643-153585801				chrX:153585642-153585643;chrX:153585801-153585802		66;0	22;0	128;0	130;4	115;0	61;0	100;0	69;0
K	alternative_acceptor	WDR45	chrX	-	chrX:48934410-48935301	chrX:48934413-48935301		chrX:48934410-48934412	chrX:48934409-48934410		8;2	7;0	17;4	39;0	17;1	19;2	10;1	27;1
K	jcn_only_AA	SSR4	chrX	+	chrX:153060210-153061888	chrX:153060210-153061117		chrX:153061118-153061888	chrX:153061888-153061889		68;0	56;2	123;0	110;0	161;0	131;0	140;5	125;0
K	cassette	RBMX	chrX	-	chrX:135958815-135961175	chrX:135958815-135960073;chrX:135960246-135961175		chrX:135960074-135960245			0;56	0;43	0;53	0;35	0;114	0;49	0;122	2;61
N	cassette	IDH3G	chrX	-	chrX:153051905-153052505	chrX:153051905-153052255;chrX:153052403-153052505		chrX:153052256-153052402			2;30	0;28	0;62	0;32	0;64	0;32	0;60	0;40
K	cassette	ZBTB33	chrX	+	chrX:119384833-119387268	chrX:119384833-119386523;chrX:119386626-119387268		chrX:119386524-119386625			5;0	2;1	10;0	13;1	3;0	19;1	9;0	10;2
N	jcn_only_AA	WDR13	chrX	+	chrX:48759795-48760011	chrX:48759795-48760008		chrX:48760009-48760011	chrX:48760011-48760012		0;14	0;15	2;24	0;15	0;24	0;10	0;25	0;17
K	cassette	TAB3	chrX	-	chrX:30852270-30864667	chrX:30852270-30861082;chrX:30861167-30864667		chrX:30861083-30861166			0;7	0;6	0;6	0;20	0;11	2;10	0;11	0;15
K	intron_retention	CDK16	chrX	+	chrX:47085427-47085677				chrX:47085426-47085427;chrX:47085677-47085678		19;2	32;2	45;4	35;2	60;3	38;0	48;0	69;2
K	jcn_only_AA	FAM122B	chrX	-	chrX:133919978-133921501	chrX:133919981-133921501		chrX:133919978-133919980	chrX:133919977-133919978		2;0	5;10	8;2	2;6	11;19	5;15	11;8	5;14
K	intron_retention	FLNA	chrX	-	chrX:153578236-153578398				chrX:153578235-153578236;chrX:153578398-153578399		315;2	101;0	645;0	580;4	544;0	278;0	576;2	415;0
K	intron_retention	OTUD5	chrX	-	chrX:48780188-48780413				chrX:48780187-48780188;chrX:48780413-48780414		0;19	8;13	3;30	5;40	5;29	5;24	7;30	13;34
K	alternative_first_exon	NXT2	chrX	+	chrX:108780251-108781273	chrX:108780500-108781273	chrX:108780105-108780250	chrX:108780347-108780499			2;1	4;1	6;2	12;2	6;3	11;0	5;2	10;2
K	intron_retention	IRAK1	chrX	-	chrX:153279730-153281482				chrX:153279729-153279730;chrX:153281482-153281483		65;2	15;0	149;4	106;6	178;3	42;4	185;5	94;2
K	intron_retention	RAP2C	chrX	-	chrX:131352362-131353397				chrX:131352361-131352362;chrX:131353397-131353398		0;0	0;0	0;0	6;4	0;0	2;2	0;0	0;2
K	cassette	LAS1L	chrX	-	chrX:64744143-64744844	chrX:64744143-64744443;chrX:64744495-64744844		chrX:64744444-64744494			8;0	0;0	8;3	2;1	9;4	0;2	19;4	3;0
K	intron_retention	EMD	chrX	+	chrX:153608380-153608593				chrX:153608379-153608380;chrX:153608593-153608594		26;0	25;0	45;2	34;5	45;0	31;0	52;0	38;0
K	jcn_only_AD	TCEAL1	chrX	+	chrX:102884490-102884812	chrX:102884502-102884812		chrX:102884490-102884501	chrX:102884489-102884490		5;0	7;0	8;5	0;0	10;8	8;2	11;2	2;5
K	cassette	ARMCX6	chrX	-	chrX:100871757-100872492	chrX:100871757-100872272;chrX:100872361-100872492		chrX:100872273-100872360			22;0	9;1	23;3	23;1	30;1	11;0	27;2	20;1
N	jcn_only_AD	FAM58A	chrX	-	chrX:5637914-5643970	chrX:5637914-5642106		chrX:5642107-5643970	chrX:5643970-5643971		0;0	0;0	73;0	9;0	67;0	0;0	55;5	2;0
K	cassette	HAUS7,TREX2	chrX	-	chrX:152719967-152720999	chrX:152719967-152720334;chrX:152720512-152720999		chrX:152720335-152720511			3;1	0;1	13;2	2;1	13;5	0;1	9;5	3;0
K	intron_retention	ARHGAP4	chrX	-	chrX:153178506-153178671				chrX:153178505-153178506;chrX:153178671-153178672		38;0	7;0	68;0	6;0	145;2	18;0	153;0	18;2
K	intron_retention	VSIG4	chrX	-	chrX:65242343-65242682				chrX:65242342-65242343;chrX:65242682-65242683		101;4	14;0	352;25	61;0	717;45	83;2	452;25	97;3
N	alternative_donor	RENBP	chrX	-	chrX:153209871-153210035	chrX:153209871-153209958		chrX:153209959-153210035	chrX:153210035-153210036		38;0	10;0	99;4	35;1	131;2	23;0	117;2	45;1
K	cassette	FLNA	chrX	-	chrX:153581826-153582282	chrX:153581826-153581921;chrX:153582096-153582282		chrX:153581922-153582095			0;386	0;118	2;672	0;579	0;490	0;313	0;551	0;462
K	alternative_donor	MORC4	chrX	-	chrX:106184863-106185205	chrX:106184863-106185167		chrX:106185168-106185205	chrX:106185205-106185206		0;0	0;0	0;0	0;0	0;2	0;1	2;0	0;0
K	alternative_donor	PQBP1	chrX	+	chrX:48755298-48755774;chrX:48755366-48755774	chrX:48755377-48755774		chrX:48755298-48755365;chrX:48755366-48755376	chrX:48755297-48755298;chrX:48755365-48755366		7;0	7;1	16;3	16;1	20;3	17;0	26;1	12;1
N	jcn_only_AA	CLCN5	chrX	+	chrX:49807072-49834533	chrX:49807072-49814891		chrX:49814892-49834533	chrX:49834533-49834534		0;0	2;0	5;0	0;0	3;2	3;0	0;0	2;0
K	intron_retention	VSIG4	chrX	-	chrX:65244972-65247290				chrX:65244971-65244972;chrX:65247290-65247291		113;0	15;0	364;0	78;0	860;3	119;0	519;0	131;0
K	intron_retention	DDX3X	chrX	+	chrX:41206266-41206564				chrX:41206265-41206266;chrX:41206564-41206565		82;0	78;0	106;0	191;2	93;0	144;0	116;0	174;2
K	alternative_acceptor	ARMCX3	chrX	+	chrX:100878267-100878803	chrX:100878267-100878775		chrX:100878776-100878803	chrX:100878803-100878804		10;0	9;1	24;3	26;4	30;2	26;2	20;6	26;4
K	intron_retention	RENBP	chrX	-	chrX:153201030-153205554				chrX:153201029-153201030;chrX:153205554-153205555		43;0	3;0	116;0	55;2	114;0	26;0	98;0	38;2
K	intron_retention	AP1S2	chrX	-	chrX:15846324-15863501				chrX:15846323-15846324;chrX:15863501-15863502		0;0	0;0	2;2	0;2	0;6	0;3	1;0	0;0
K	cassette	IDS	chrX	-	chrX:148571972-148577876	chrX:148571972-148573068;chrX:148573199-148577876		chrX:148573069-148573198			27;1	33;2	57;5	47;9	41;2	76;6	48;4	86;8
K	intron_retention	RBBP7	chrX	-	chrX:16870999-16871804				chrX:16870998-16870999;chrX:16871804-16871805		24;0	14;0	36;0	14;0	70;2	18;0	72;2	26;0
K	alternative_acceptor	SLC35A2	chrX	-	chrX:48762170-48763668	chrX:48762760-48763668		chrX:48762170-48762759	chrX:48762169-48762170		0;10	5;5	5;19	5;14	14;18	7;13	13;21	10;14
N	alternative_donor	ABCD1	chrX	+	chrX:153001968-153002610	chrX:153002366-153002610		chrX:153001968-153002365	chrX:153001967-153001968		27;1	23;2	22;0	59;2	20;1	51;1	39;2	81;4
N	alternative_acceptor	MSN	chrX	+	chrX:64887721-64936679	chrX:64887721-64921374		chrX:64921375-64936679	chrX:64936679-64936680		338;0	232;0	623;0	715;0	778;0	599;0	822;0	708;0
N	intron_retention		chrX	+	chrX:23803216-23803444				chrX:23803215-23803216;chrX:23803444-23803445		0;172	0;376	0;110	3;699	0;76	0;739	0;64	0;852
N	alternative_acceptor	AIFM1	chrX	-	chrX:129264078-129265649	chrX:129264142-129265649		chrX:129264078-129264141	chrX:129264077-129264078		0;23	0;11	0;45	0;15	2;59	0;12	0;54	0;20
K	alternative_acceptor	MPP1	chrX	-	chrX:154014616-154018228	chrX:154014676-154018228		chrX:154014616-154014675	chrX:154014615-154014616		0;135	0;36	3;157	0;135	0;262	8;132	11;201	0;161
K	alternative_first_exon	TMEM164	chrX	+	chrX:109246001-109246728	chrX:109246407-109246728	chrX:109245863-109246000	chrX:109246342-109246406			0;2	0;0	1;8	0;5	0;5	1;3	3;8	4;6
K	intron_retention	DDX3X	chrX	+	chrX:41202090-41202468				chrX:41202089-41202090;chrX:41202468-41202469		143;0	147;0	193;2	284;0	239;0	238;3	211;0	303;0
K	intron_retention	GRIPAP1	chrX	-	chrX:48832524-48832652				chrX:48832523-48832524;chrX:48832652-48832653		7;0	24;0	16;0	45;2	19;3	32;0	17;0	58;2
K	intron_retention	IDS	chrX	-	chrX:148582569-148583604				chrX:148582568-148582569;chrX:148583604-148583605		0;2	0;0	0;0	0;3	0;2	13;2	0;0	8;4
K	alternative_acceptor	FAM122B	chrX	-	chrX:133919978-133921501	chrX:133919981-133921501		chrX:133919978-133919980	chrX:133919977-133919978		2;0	5;5	8;1	2;3	11;9	5;7	11;4	5;7
K	intron_retention	PDHA1	chrX	+	chrX:19372702-19373466				chrX:19372701-19372702;chrX:19373466-19373467		20;3	13;0	44;3	19;0	56;0	14;0	66;2	20;0
K	jcn_only_AD	NDUFB11	chrX	-	chrX:47001840-47002012	chrX:47001840-47001982		chrX:47001983-47002012	chrX:47002012-47002013		63;19	49;9	126;31	52;15	138;31	55;11	148;36	61;14
K	jcn_only_AD	PQBP1	chrX	+	chrX:48755298-48755774;chrX:48755366-48755774	chrX:48755377-48755774		chrX:48755298-48755365;chrX:48755366-48755376	chrX:48755297-48755298;chrX:48755365-48755366		13;0	10;3	27;6	26;2	28;6	25;0	47;2	18;2
N	cassette	XIST	chrX	-	chrX:73051110-73057274	chrX:73051110-73053072;chrX:73053210-73057274		chrX:73053073-73053209			0;29	0;25	0;34	0;36	0;51	0;33	5;40	0;35
N	jcn_only_AD	DDX26B	chrX	+	chrX:134703357-134706739	chrX:134704472-134706739		chrX:134703357-134704471	chrX:134703356-134703357		3;0	0;5	0;0	0;0	0;5	0;6	0;2	0;6
N	jcn_only_AA	MBNL3	chrX	-	chrX:131540421-131622878	chrX:131574343-131622878		chrX:131540421-131574342	chrX:131540420-131540421		2;0	0;0	2;3	0;0	0;0	0;0	0;0	0;0
K	jcn_only_AA	RBM3	chrX	+	chrX:48434056-48434701	chrX:48434056-48434202					73;0	38;0	151;0	100;0	200;0	50;3	219;0	53;0
K	jcn_only_AD	PIR,TSC22D3	chrX	-	chrX:15509433-15511312	chrX:15509433-15511278		chrX:15511279-15511312	chrX:15511312-15511313		3;0	0;0	9;5	11;0	10;2	2;0	8;0	0;0
K	alternative_acceptor	DIAPH2,NGFRAP1	chrX	+	chrX:102632035-102632437	chrX:102632035-102632390		chrX:102632391-102632437	chrX:102632437-102632438		36;3	8;1	39;6	0;0	75;13	16;4	57;4	11;1
K	jcn_only_AA	RAP2C	chrX	-	chrX:131351835-131353397;chrX:131352362-131353397	chrX:131352370-131353397					0;0	0;3	2;2	6;7	0;0	2;5	0;2	0;8
K	intron_retention	FLNA	chrX	-	chrX:153595913-153596008				chrX:153595912-153595913;chrX:153596008-153596009		288;0	85;0	586;0	518;3	455;0	286;0	476;0	410;0
K	intron_retention	MORF4L2	chrX	-	chrX:102939658-102940098				chrX:102939657-102939658;chrX:102940098-102940099		8;0	8;0	17;2	17;0	22;2	6;2	34;0	15;0
K	intron_retention	RBBP7	chrX	-	chrX:16870752-16870871				chrX:16870751-16870752;chrX:16870871-16870872		23;0	17;0	55;0	20;0	89;0	18;0	94;4	30;0
N	intron_retention		chrX	-	chrX:148583650-148584841				chrX:148583649-148583650;chrX:148584841-148584842		0;0	0;3	0;5	0;6	0;3	0;10	0;2	2;7
K	intron_retention	DNASE1L1	chrX	-	chrX:153638012-153640227				chrX:153638011-153638012;chrX:153640227-153640228		0;2	0;2	3;5	0;0	0;9	0;3	0;7	0;2
K	alternative_donor	ARMCX2	chrX	-	chrX:100913129-100913477	chrX:100913129-100913446		chrX:100913447-100913477	chrX:100913477-100913478		0;0	0;0	0;0	0;0	0;0	0;1	0;0	2;2
K	jcn_only_AD	MBNL3	chrX	-	chrX:131540421-131622878	chrX:131540421-131573462		chrX:131573463-131622878	chrX:131622878-131622879		2;0	0;0	2;0	0;0	0;0	0;0	0;6	0;0
K	jcn_only_AD	GLA,PIGA	chrX	-	chrX:100655746-100656619	chrX:100655746-100656220					63;0	52;0	149;0	115;2	132;0	83;0	144;0	168;0
K	intron_retention	MAGED2	chrX	+	chrX:54842124-54842313				chrX:54842123-54842124;chrX:54842313-54842314		7;0	10;0	23;5	52;5	19;2	40;3	16;0	43;6
N	cassette	FLNA	chrX	-	chrX:153593855-153594675	chrX:153593855-153594391;chrX:153594593-153594675		chrX:153594392-153594592			0;317	0;100	0;526	0;460	0;384	0;242	2;384	0;334
K	alternative_acceptor	MORF4L2	chrX	-	chrX:102933529-102939608	chrX:102933580-102939608		chrX:102933529-102933579	chrX:102933528-102933529		3;5	0;2	13;13	2;12	17;20	3;10	17;15	7;11
K	intron_retention	BCAP31	chrX	-	chrX:152988744-152989470				chrX:152988743-152988744;chrX:152989470-152989471		0;9	0;3	0;0	0;0	5;6	0;0	0;3	0;0
N	jcn_only_AA	USP9X	chrX	+	chrX:41010311-41012200	chrX:41010311-41012185		chrX:41012186-41012200	chrX:41012200-41012201		16;0	15;0	38;0	17;16	25;14	20;0	14;19	26;15
N	jcn_only_AD	THOC2	chrX	-	chrX:122772879-122774388	chrX:122772879-122774376		chrX:122774377-122774388	chrX:122774388-122774389		8;0	6;0	6;0	9;0	15;2	14;0	19;0	10;0
K	alternative_acceptor	FTSJ1,WBP5	chrX	+	chrX:48340104-48340796	chrX:48340104-48340790		chrX:48340791-48340796	chrX:48340796-48340797		3;3	0;1	5;12	0;3	5;11	0;2	7;8	2;5
K	intron_retention	AP1S2	chrX	-	chrX:15845496-15863501				chrX:15845495-15845496;chrX:15863501-15863502		118;3	50;2	335;3	93;2	422;12	108;4	326;5	102;2
K	intron_retention	PGK1	chrX	+	chrX:77380549-77380823				chrX:77380548-77380549;chrX:77380823-77380824		240;0	538;5	360;0	297;2	834;2	682;2	672;0	1033;4
K	jcn_only_AA	DIAPH2,FAM122C	chrX	+	chrX:96013258-96136577	chrX:96013258-96018098					10;3	0;0	5;7	0;0	9;0	5;0	7;3	2;5
K	alternative_acceptor	ZNF185	chrX	+	chrX:152088956-152089253	chrX:152088956-152089250		chrX:152089251-152089253	chrX:152089253-152089254		0;2	2;3	3;6	0;1	6;11	5;0	9;12	6;2
K	cassette	LONRF3	chrX	+	chrX:118112427-118123370	chrX:118112427-118116783;chrX:118116907-118123370		chrX:118116784-118116906			0;4	0;1	5;6	0;0	5;8	2;0	9;12	0;2
K	intron_retention	MAGED2	chrX	+	chrX:54835657-54835735				chrX:54835656-54835657;chrX:54835735-54835736		0;0	0;0	6;4	0;6	8;9	0;2	5;6	6;2
K	alternative_first_exon	MAGED2	chrX	+	chrX:54834867-54835735;chrX:54834236-54835735	chrX:54835657-54835735	chrX:54834771-54834866;chrX:54834032-54834235	chrX:54835493-54835656			8;2	17;0	17;4	34;1	17;5	33;2	16;4	45;3
N	jcn_only_AD	RRAGB	chrX	+	chrX:55778835-55779824;chrX:55777630-55779824	chrX:55778787-55779824		chrX:55777630-55778786;chrX:55778787-55778834	chrX:55777629-55777630;chrX:55778786-55778787		2;0	2;0	2;2	0;0	11;0	3;0	0;0	5;0
K	coord_cassette	GK	chrX	+	chrX:30671733-30695491	chrX:30671733-30683627;chrX:30683702-30686128;chrX:30686236-30695491		chrX:30683628-30683701;chrX:30686129-30686235			0;8	0;53	0;11	0;46	0;6	0;56	0;8	3;103
N	intron_retention		chrX	-	chrX:65242530-65242682				chrX:65242529-65242530;chrX:65242682-65242683		0;7	0;0	2;24	0;0	0;45	0;0	0;32	0;2
K	intron_retention	KDM5C	chrX	-	chrX:53227820-53227945				chrX:53227819-53227820;chrX:53227945-53227946		18;2	30;2	50;0	40;3	47;0	41;0	38;2	72;2
K	jcn_only_AD	MORC4	chrX	-	chrX:106184863-106185205	chrX:106184863-106185167		chrX:106185168-106185205	chrX:106185205-106185206		0;0	0;0	0;0	0;0	0;5	0;2	2;0	0;0
K	intron_retention	SAT1	chrX	+	chrX:23803547-23803636				chrX:23803546-23803547;chrX:23803636-23803637		459;9	938;27	363;7	1853;58	334;7	2480;47	265;0	2138;57
K	alternative_donor	ATP6AP1	chrX	+	chrX:153657521-153660175	chrX:153660004-153660175		chrX:153657521-153660003	chrX:153657520-153657521		180;8	160;9	336;9	275;10	302;11	219;10	295;9	359;12
K	intron_retention	WDR45	chrX	-	chrX:48934410-48935301				chrX:48934409-48934410;chrX:48935301-48935302		8;2	7;2	17;2	39;3	17;2	19;0	10;0	27;2
K	cassette	ZFX	chrX	+	chrX:24170948-24190831	chrX:24170948-24179831;chrX:24179960-24190831		chrX:24179832-24179959			0;1	3;2	8;1	11;5	7;3	8;2	5;3	9;5
N	alternative_acceptor		chrX	.	chrX:23801535-23801774	chrX:23801535-23801760		chrX:23801761-23801774	chrX:23801774-23801775		564;0	1103;2	460;3	2144;2	401;0	2570;5	235;0	2881;8
K	jcn_only_AA	BRCC3	chrX	+	chrX:154300619-154301651	chrX:154300619-154301648		chrX:154301649-154301651	chrX:154301651-154301652		8;0	9;0	19;6	16;0	35;2	11;0	38;8	14;0
K	jcn_only_AD	ATP6AP1	chrX	+	chrX:153657521-153660175	chrX:153660004-153660175		chrX:153657521-153660003	chrX:153657520-153657521		180;0	160;0	336;0	275;0	302;11	219;0	295;0	359;2
K	alternative_last_exon	PHF8	chrX	-	chrX:53966950-53970566	chrX:53969836-53970566	chrX:53966613-53966949	chrX:53969050-53969835			7;1	9;0	14;0	22;1	14;1	16;0	12;0	17;0
K	jcn_only_AA	ANOS1	chrX	-	chrX:8522140-8536272	chrX:8534254-8536272		chrX:8522140-8534253	chrX:8522139-8522140		3;0	3;0	36;11	5;0	17;0	6;2	2;0	3;0
N	alternative_acceptor	BRWD3	chrX	-	chrX:79985520-79988954	chrX:79986711-79988954		chrX:79985520-79986710	chrX:79985519-79985520		6;0	7;0	7;0	9;1	9;0	5;1	5;0	7;0
K	cassette	GK	chrX	+	chrX:30714801-30718530	chrX:30714801-30715848;chrX:30715867-30718530		chrX:30715849-30715866			13;0	90;5	14;3	72;6	7;0	72;15	18;1	183;16
K	alternative_acceptor	FMR1	chrX	+	chrX:147024847-147026424;chrX:147024847-147026388	chrX:147024847-147026463		chrX:147026389-147026424;chrX:147026425-147026463	chrX:147026424-147026425;chrX:147026463-147026464		4;2	5;2	6;3	22;10	15;2	17;3	10;2	21;0
N	alternative_acceptor	RAP2C	chrX	-	chrX:131339616-131348161	chrX:131347984-131348161		chrX:131339616-131347983	chrX:131339615-131339616		41;1	63;1	38;1	122;3	60;1	78;1	36;1	133;2
K	intron_retention	ARMCX3	chrX	+	chrX:100878421-100878803				chrX:100878420-100878421;chrX:100878803-100878804		0;0	0;0	0;4	2;2	0;2	0;3	0;5	2;3
K	intron_retention	SAT1	chrX	+	chrX:23802001-23802410				chrX:23802000-23802001;chrX:23802410-23802411		40;210	132;531	48;128	256;836	20;80	231;787	17;59	297;1047
N	alternative_acceptor	ZNF75D	chrX	-	chrX:134425490-134426206	chrX:134425554-134426206		chrX:134425490-134425553	chrX:134425489-134425490		5;0	0;0	2;1	6;1	3;3	0;0	0;0	5;0
K	intron_retention	MPP1	chrX	-	chrX:154012384-154013325				chrX:154012383-154012384;chrX:154013325-154013326		158;9	48;0	219;0	188;3	298;5	166;6	232;2	167;2
K	alternative_last_exon	LAMP2	chrX	-	chrX:119565318-119575584	chrX:119573149-119575584	chrX:119564681-119565317	chrX:119570349-119573148			114;95	75;79	148;146	190;141	185;159	174;122	131;155	149;117
K	jcn_only_AD	IQSEC2	chrX	-	chrX:53264367-53265503	chrX:53264367-53264964					2;0	2;0	9;2	9;0	0;0	0;0	0;0	5;0
K	alternative_first_exon	MAGED2	chrX	+	chrX:54835657-54835735;chrX:54834867-54835735	chrX:54834236-54835735	chrX:54835493-54835656;chrX:54834771-54834866	chrX:54834032-54834235			5;5	14;3	15;6	18;17	15;7	20;15	16;4	32;16
K	cassette	DMD	chrX	-	chrX:31191722-31196785	chrX:31191722-31196048;chrX:31196088-31196785		chrX:31196049-31196087			0;0	0;0	2;0	0;0	0;1	0;0	2;1	2;2
K	intron_retention	DDX3X	chrX	+	chrX:41202605-41202989				chrX:41202604-41202605;chrX:41202989-41202990		88;0	88;2	136;0	206;3	136;0	144;4	136;0	182;2
K	alternative_first_exon	CDK16	chrX	+	chrX:47078505-47082950;chrX:47081742-47082950	chrX:47078064-47082950	chrX:47078087-47078504;chrX:47081660-47081741	chrX:47077632-47078063			4;1	9;9	23;2	8;2	18;4	9;5	13;3	15;7
K	jcn_only_AA	FMR1	chrX	+	chrX:147024847-147026388;chrX:147024847-147026463	chrX:147024847-147026424		chrX:147026389-147026424;chrX:147026425-147026463	chrX:147026424-147026425;chrX:147026463-147026464		7;0	8;0	8;0	39;0	15;2	26;3	15;0	32;0
K	jcn_only_AA	SLC35A2	chrX	-	chrX:48762170-48763668	chrX:48762760-48763668		chrX:48762170-48762759	chrX:48762169-48762170		0;7	5;0	5;7	5;13	14;15	7;8	13;16	10;13
N	intron_retention		chrX	+	chrX:48546843-48547204				chrX:48546842-48546843;chrX:48547204-48547205		0;6	0;0	0;5	0;3	2;9	0;5	0;7	0;6
K	intron_retention	PHF6	chrX	+	chrX:133559361-133559690				chrX:133559360-133559361;chrX:133559690-133559691		11;0	9;2	15;4	6;0	14;6	9;0	15;6	11;0
K	jcn_only_AD	BCOR,DNASE1L1	chrX	-	chrX:153633997-153637447	chrX:153633997-153636893		chrX:153636894-153637447	chrX:153637447-153637448		13;0	3;0	24;0	14;0	18;2	11;3	39;3	16;2
K	cassette	UPRT	chrX	+	chrX:74513350-74516176	chrX:74513350-74514397;chrX:74514456-74516176		chrX:74514398-74514455			6;0	2;0	9;3	6;1	19;1	11;2	6;1	11;0
K	intron_retention	SAT1	chrX	+	chrX:23802521-23803444				chrX:23802520-23802521;chrX:23803444-23803445		65;157	164;384	51;98	270;736	32;84	295;843	16;65	307;977
K	jcn_only_AD	RBM10	chrX	+	chrX:47004885-47006755	chrX:47004916-47006755		chrX:47004885-47004915	chrX:47004884-47004885		6;0	5;0	15;3	9;3	15;3	6;0	16;0	10;7
K	alternative_first_exon	DNASE1L1,RAP2C	chrX	-	chrX:131351835-131353397	chrX:131351835-131351943	chrX:131353398-131353508	chrX:131351944-131352152			1;1	1;2	1;8	1;13	1;4	1;7	1;3	1;9
K	intron_retention	DDX3X	chrX	+	chrX:41206266-41206567				chrX:41206265-41206266;chrX:41206567-41206568		36;0	26;0	50;0	84;2	60;0	78;0	68;0	83;2
N	jcn_only_AD	BCAP31	chrX	-	chrX:128945486-128947636	chrX:128945486-128946693		chrX:128946694-128947636	chrX:128947636-128947637		0;5	0;23	0;5	0;85	0;9	2;69	0;6	0;51
K	intron_retention	ATP6AP1	chrX	+	chrX:153657521-153660175				chrX:153657520-153657521;chrX:153660175-153660176		180;3	160;0	336;2	275;3	302;2	219;2	295;2	359;3
K	alternative_donor	GK	chrX	+	chrX:30695570-30709239	chrX:30705734-30709239		chrX:30695570-30705733	chrX:30695569-30695570		9;0	74;0	19;0	55;0	11;0	88;0	15;0	138;1
K	jcn_only_AA	ARMCX5,ARMCX5-GPRASP2,MAOA	chrX	+	chrX:43515663-43542760	chrX:43515663-43517109					6;0	39;2	27;0	31;0	17;0	26;0	10;0	45;0
K	intron_retention	WDR45	chrX	-	chrX:48934413-48935301				chrX:48934412-48934413;chrX:48935301-48935302		0;2	0;2	3;2	0;3	2;2	5;0	2;2	2;2
K	alternative_first_exon	ARMCX3	chrX	+	chrX:100878267-100878803	chrX:100878421-100878803	chrX:100877787-100878266	chrX:100878351-100878420			4;1	4;1	7;0	6;2	9;1	8;1	7;0	9;2
N	alternative_acceptor	WDR13	chrX	+	chrX:48759795-48760011	chrX:48759795-48760008		chrX:48760009-48760011	chrX:48760011-48760012		0;7	0;7	2;12	0;7	0;12	0;5	0;14	0;8
K	intron_retention	TAZ	chrX	+	chrX:153641590-153641818				chrX:153641589-153641590;chrX:153641818-153641819		0;0	6;2	15;3	5;2	13;6	8;0	17;2	7;3
K	alternative_acceptor	ABCB7	chrX	-	chrX:74334667-74375939	chrX:74334670-74375939		chrX:74334667-74334669	chrX:74334666-74334667		6;0	5;0	6;2	6;2	7;4	5;1	10;4	8;1
N	alternative_donor	RRAGB	chrX	+	chrX:55778835-55779824;chrX:55777630-55779824	chrX:55778787-55779824		chrX:55777630-55778786;chrX:55778787-55778834	chrX:55777629-55777630;chrX:55778786-55778787		2;0	2;0	2;0	0;0	6;0	3;0	0;0	5;0
K	cassette	DDX3X	chrX	+	chrX:41196719-41200736	chrX:41196719-41198288;chrX:41198337-41200736		chrX:41198289-41198336			2;111	0;102	0;130	2;202	0;158	2;170	0;161	2;213
K	coord_cassette	ACOT9	chrX	-	chrX:23751335-23761241	chrX:23751335-23752457;chrX:23752485-23754035;chrX:23754134-23761241		chrX:23752458-23752484;chrX:23754036-23754133			0;25	0;33	0;28	3;139	0;23	2;86	0;32	0;136
K	alternative_donor	GNL3L	chrX	+	chrX:54556736-54558952	chrX:54556853-54558952		chrX:54556736-54556852	chrX:54556735-54556736		2;1	0;0	2;4	2;3	5;5	6;1	3;5	2;3
K	alternative_acceptor	FMR1,SSR4	chrX	+	chrX:147027137-147030253	chrX:147027137-147030202		chrX:147030203-147030253	chrX:147030253-147030254		0;4	0;3	0;5	0;22	9;10	10;16	9;8	0;16
K	intron_retention	FAM3A	chrX	-	chrX:153744137-153744233				chrX:153744136-153744137;chrX:153744233-153744234		5;5	2;2	9;7	0;6	0;8	6;2	6;5	11;11
K	intron_retention	FTSJ1	chrX	+	chrX:48341183-48341373				chrX:48341182-48341183;chrX:48341373-48341374		6;0	7;0	15;7	5;0	15;5	0;0	10;3	5;0
K	jcn_only_AD	GNL3L	chrX	+	chrX:54556736-54558952	chrX:54556853-54558952		chrX:54556736-54556852	chrX:54556735-54556736		2;2	0;0	2;7	2;2	5;9	6;0	3;6	2;5
K	intron_retention	KDM5C	chrX	-	chrX:53222515-53222618				chrX:53222514-53222515;chrX:53222618-53222619		18;0	34;2	30;2	27;0	26;5	42;3	41;2	69;0
K	alternative_donor	KLHL13,PSMD10	chrX	-	chrX:107328358-107330994	chrX:107328358-107330915		chrX:107330916-107330994	chrX:107330994-107330995		0;24	0;17	6;35	0;21	8;40	2;18	7;37	2;31
K	alternative_acceptor	TCEAL4	chrX	+	chrX:102841220-102841581	chrX:102841220-102841576		chrX:102841577-102841581	chrX:102841581-102841582		3;12	3;9	9;23	2;15	14;38	5;11	8;26	6;21
K	cassette	XIAP	chrX	+	chrX:122994144-123022468	chrX:122994144-123019480;chrX:123020390-123022468		chrX:123019481-123020389			2;9	6;14	2;18	10;29	5;21	5;21	0;24	9;30
K	alternative_donor	HUWE1	chrX	-	chrX:53627270-53629551	chrX:53627270-53629524		chrX:53629525-53629551	chrX:53629551-53629552		0;17	0;13	0;18	0;31	3;37	0;18	0;33	0;22
K	cassette	PQBP1	chrX	+	chrX:48759320-48760008	chrX:48759320-48759509;chrX:48759795-48760008		chrX:48759510-48759794			0;41	0;30	0;53	2;42	2;62	0;30	0;61	0;35
N	intron_retention		chrX	.	chrX:23801535-23801760				chrX:23801534-23801535;chrX:23801760-23801761		0;0	0;6	0;6	0;6	0;0	6;8	0;0	6;11
K	intron_retention	PHKA2	chrX	-	chrX:18915452-18917290				chrX:18915451-18915452;chrX:18917290-18917291		7;0	0;0	6;2	5;0	8;0	3;2	8;2	6;0
N	alternative_donor	APOO	chrX	-	chrX:23899070-23925810;chrX:23899070-23901620	chrX:23899070-23901475		chrX:23901476-23901620;chrX:23901621-23925810	chrX:23901620-23901621;chrX:23925810-23925811		2;0	0;0	7;0	0;1	10;0	0;1	10;0	3;1
K	alternative_donor	PIGA	chrX	-	chrX:15344169-15349711	chrX:15344169-15349337		chrX:15349338-15349711	chrX:15349711-15349712		2;2	0;3	0;6	0;5	0;10	2;4	2;9	0;8
K	alternative_first_exon	ELF4	chrX	-	chrX:129215514-129244594	chrX:129215514-129244299	chrX:129244595-129244691	chrX:129244300-129244470			3;3	1;9	0;9	4;34	2;10	1;14	2;10	4;16
N	jcn_only_AA		chrX	+	chrX:75396828-75397523	chrX:75396828-75397450		chrX:75397451-75397523	chrX:75397523-75397524		0;44	0;28	2;48	0;43	0;70	0;31	0;52	0;41
K	coord_cassette	FAM3A	chrX	-	chrX:153740205-153744083	chrX:153740205-153740637;chrX:153740736-153741146;chrX:153741261-153744083		chrX:153740638-153740735;chrX:153741147-153741260			0;4	0;2	5;5	0;0	0;6	0;3	0;3	1;2
N	alternative_donor	HNRNPH2	chrX	+	chrX:100663296-100666923	chrX:100663308-100666923		chrX:100663296-100663307	chrX:100663295-100663296		2;7	0;10	5;23	7;18	11;24	11;15	6;18	5;20
K	intron_retention	MORF4L2	chrX	-	chrX:102933529-102940098				chrX:102933528-102933529;chrX:102940098-102940099		26;7	31;3	40;15	27;14	51;22	22;11	42;16	47;13
K	intron_retention	RAP2C	chrX	-	chrX:131352041-131352259				chrX:131352040-131352041;chrX:131352259-131352260		0;0	0;0	0;0	2;9	0;0	0;2	0;0	0;5
N	jcn_only_AA	ZNF75D	chrX	-	chrX:134429966-134475692	chrX:134472251-134475692		chrX:134429966-134472250	chrX:134429965-134429966		0;0	0;0	3;0	0;0	0;0	0;0	0;2	0;0
K	jcn_only_AA	ARMCX3	chrX	+	chrX:100878421-100878803	chrX:100878421-100878775		chrX:100878776-100878803	chrX:100878803-100878804		0;0	0;0	0;0	2;0	0;0	0;0	0;0	2;6
K	jcn_only_AD	ARMCX2	chrX	-	chrX:100913129-100913477	chrX:100913129-100913446		chrX:100913447-100913477	chrX:100913477-100913478		0;0	0;0	0;0	0;0	0;0	0;3	0;0	2;5
N	alternative_donor	WAS	chrX	+	chrX:48547824-48549497	chrX:48548658-48549497		chrX:48547824-48548657	chrX:48547823-48547824		33;1	19;0	40;1	22;1	90;2	32;1	76;2	67;1
K	mutually_exclusive	ZNF185	chrX	+	chrX:152090801-152097118,chrX:152097206-152100215	chrX:152090801-152091263,chrX:152091354-152100215	chrX:152097119-152097205	chrX:152091264-152091353			1;0	0;0	0;1	0;1	1;0	3;0	8;0	4;1
K	alternative_first_exon	ARMCX3	chrX	+	chrX:100878267-100878775	chrX:100878421-100878775	chrX:100877787-100878266	chrX:100878351-100878420			0;1	1;1	0;0	2;0	2;1	0;1	2;0	2;4
K	jcn_only_AA	SCML1	chrX	+	chrX:17755801-17764134;chrX:17755801-17762190	chrX:17755801-17764137					0;0	0;0	5;7	0;2	5;5	0;0	7;8	0;2
K	intron_retention	DDX3X	chrX	+	chrX:41201907-41201989				chrX:41201906-41201907;chrX:41201989-41201990		151;0	160;0	201;0	292;7	240;2	288;3	260;2	366;2
K	coord_cassette	TMEM255A	chrX	-	chrX:119402243-119421008	chrX:119402243-119410739;chrX:119410903-119418981;chrX:119419071-119421008		chrX:119410740-119410902;chrX:119418982-119419070			0;5	0;3	0;12	2;19	0;6	0;6	2;7	0;9
K	intron_retention	GDI1	chrX	+	chrX:153668854-153669442				chrX:153668853-153668854;chrX:153669442-153669443		40;0	39;0	66;4	105;0	58;2	102;0	65;0	108;0
K	alternative_donor	NDUFB11	chrX	-	chrX:47001840-47002012	chrX:47001840-47001982		chrX:47001983-47002012	chrX:47002012-47002013		63;11	49;7	126;22	52;9	138;30	55;9	148;32	61;9
K	alternative_first_exon	MAGED2	chrX	+	chrX:54835657-54835735;chrX:54834236-54835735	chrX:54834867-54835735	chrX:54835493-54835656;chrX:54834032-54834235	chrX:54834771-54834866			7;3	3;14	10;11	18;17	12;10	17;18	8;12	19;29
K	intron_retention	PHF8	chrX	-	chrX:53964493-53965594				chrX:53964492-53964493;chrX:53965594-53965595		0;3	2;3	0;3	0;6	5;6	5;4	2;6	6;8
N	jcn_only_AD	MSN	chrX	+	chrX:64887721-64936679;chrX:64923554-64936679	chrX:64921504-64936679		chrX:64887721-64921503;chrX:64921504-64923553	chrX:64887720-64887721;chrX:64921503-64921504		338;0	232;0	623;0	715;0	788;0	599;0	822;2	720;0
K	cassette	TMEM185A	chrX	-	chrX:148690522-148713225	chrX:148690522-148692969;chrX:148693147-148713225		chrX:148692970-148693146			3;9	0;8	0;14	0;12	0;14	3;11	2;18	0;15
K	intron_retention	GLA	chrX	-	chrX:100653935-100654731				chrX:100653934-100653935;chrX:100654731-100654732		0;0	0;0	0;0	0;0	3;2	2;3	0;0	0;2
K	cassette	IDS	chrX	-	chrX:148582569-148584841	chrX:148582569-148583604;chrX:148583708-148584841		chrX:148583605-148583707			32;3	44;5	95;3	106;8	56;4	100;11	77;1	131;9
K	alternative_acceptor	MOSPD2	chrX	+	chrX:14936905-14939501	chrX:14936905-14937793		chrX:14937794-14939501	chrX:14939501-14939502		0;23	0;11	16;23	0;13	7;27	0;13	15;26	0;17
K	intron_retention		chrX	+	chrX:48759795-48760008				chrX:48759794-48759795;chrX:48760008-48760009		14;0	15;0	24;0	15;0	24;2	10;0	25;2	17;0
K	intron_retention	ARMCX3	chrX	+	chrX:100878267-100878803				chrX:100878266-100878267;chrX:100878803-100878804		10;0	9;0	24;4	26;6	30;2	26;3	20;7	26;3
N	alternative_donor	MSN	chrX	+	chrX:64921504-64936679;chrX:64923554-64936679	chrX:64887721-64936679		chrX:64887721-64921503;chrX:64921504-64923553	chrX:64887720-64887721;chrX:64921503-64921504		0;338	0;232	0;623	0;715	0;778	0;599	0;822	0;708
K	alternative_donor	FAM199X	chrX	+	chrX:103432859-103434288	chrX:103432988-103434288		chrX:103432859-103432987	chrX:103432858-103432859		0;17	0;12	0;29	0;19	2;26	0;16	0;28	0;23
K	intron_retention	SAT1	chrX	+	chrX:23801827-23801916				chrX:23801826-23801827;chrX:23801916-23801917		832;13	1513;23	451;15	2056;72	447;11	3063;56	370;4	3125;71
K	jcn_only_AD	PQBP1	chrX	+	chrX:48755377-48755774;chrX:48755366-48755774	chrX:48755298-48755774		chrX:48755298-48755365;chrX:48755366-48755376	chrX:48755297-48755298;chrX:48755365-48755366		13;0	11;2	30;3	24;5	32;2	23;2	43;6	17;3
K	alternative_first_exon	PDZD11,RBMX	chrX	-	chrX:69509205-69509709	chrX:69509205-69509371	chrX:69509710-69509829	chrX:69509372-69509443			10;1	5;1	13;1	9;1	16;1	7;0	22;8	12;1
K	intron_retention	PGK1	chrX	+	chrX:77373668-77378331				chrX:77373667-77373668;chrX:77378331-77378332		292;0	684;5	409;0	323;0	936;0	708;0	726;0	1084;2
K	intron_retention	PIM2	chrX	-	chrX:48772670-48775057				chrX:48772669-48772670;chrX:48775057-48775058		2;0	5;2	11;5	6;0	3;0	6;0	2;0	2;3
K	intron_retention	CDC16	chr13	+	chr13:115037957-115038038				chr13:115037956-115037957;chr13:115038038-115038039		2;18	0;10	7;22	6;20	10;27	2;11	6;22	6;16
N	alternative_acceptor		chr13	+	chr13:44453880-44455087	chr13:44453880-44454051		chr13:44454052-44455087	chr13:44455087-44455088		0;7	0;1	8;59	0;17	0;14	3;5	8;18	3;9
K	cassette	DHRS12	chr13	-	chr13:52365394-52373669	chr13:52365394-52371961;chr13:52372045-52373669		chr13:52371962-52372044			3;3	0;1	0;2	2;6	5;4	2;3	2;3	2;7
K	intron_retention	SETDB2	chr13	+	chr13:50038193-50041999				chr13:50038192-50038193;chr13:50041999-50042000		3;0	1;0	6;0	2;3	9;0	2;2	8;0	0;0
N	jcn_only_AD		chr13	+	chr13:44453871-44454051	chr13:44453880-44454051		chr13:44453871-44453879	chr13:44453870-44453871		0;0	0;0	0;2	0;0	3;0	0;0	0;6	0;0
N	jcn_only_AD	TFDP1	chr13	+	chr13:114292200-114294434	chr13:114292212-114294434		chr13:114292200-114292211	chr13:114292199-114292200		6;23	0;7	15;27	5;15	23;72	7;9	24;77	8;25
K	intron_retention	RCBTB1	chr13	-	chr13:50119000-50123593				chr13:50118999-50119000;chr13:50123593-50123594		14;0	5;0	7;0	6;0	17;2	9;0	13;0	13;2
K	alternative_last_exon	CCNA1,POLR1D	chr13	+	chr13:28196147-28222515	chr13:28196147-28197011	chr13:28222516-28222590	chr13:28197012-28197589			19;33	13;20	25;41	14;27	33;58	14;22	23;52	15;27
K	intron_retention	TFDP1	chr13	+	chr13:114292212-114294434				chr13:114292211-114292212;chr13:114294434-114294435		23;0	7;0	27;0	15;3	72;5	9;0	77;0	25;2
K	alternative_donor	LAMP1	chr13	+	chr13:113976043-113976596	chr13:113976193-113976596		chr13:113976043-113976192	chr13:113976042-113976043		585;3	305;4	1722;7	1517;16	1852;7	1067;7	1152;6	888;9
N	alternative_acceptor	MYCBP2	chr13	-	chr13:77730338-77732071	chr13:77730860-77732071		chr13:77730338-77730859	chr13:77730337-77730338		6;0	8;0	16;0	11;0	19;0	13;0	30;0	22;0
K	intron_retention	TPT1	chr13	-	chr13:45913738-45914128				chr13:45913737-45913738;chr13:45914128-45914129		3102;0	1866;0	2274;2	1507;6	3900;6	2081;2	2499;5	1959;3
K	alternative_last_exon	N4BP2L1	chr13	-	chr13:32994714-33002040;chr13:33000093-33002040	chr13:32981910-33002040	chr13:32994508-32994713;chr13:32999495-33000092	chr13:32981782-32981909			1;13	12;66	4;7	20;63	5;12	9;58	1;10	14;69
K	intron_retention	N4BP2L2	chr13	-	chr13:33095587-33096318				chr13:33095586-33095587;chr13:33096318-33096319		19;5	17;3	17;5	25;6	23;5	16;7	22;3	18;2
K	intron_retention	COL4A2-AS2	chr13	-	chr13:111109704-111109871				chr13:111109703-111109704;chr13:111109871-111109872		10;14	0;2	0;0	0;0	0;0	0;0	0;0	0;0
K	jcn_only_AA	FBXL3	chr13	-	chr13:77576185-77589543	chr13:77581924-77589543		chr13:77576185-77581923	chr13:77576184-77576185		0;25	0;38	0;23	0;42	2;32	0;35	0;42	0;65
K	alternative_first_exon	TPT1-AS1	chr13	+	chr13:45963956-45965166	chr13:45965038-45965166	chr13:45963870-45963955	chr13:45964849-45965037			0;1	0;1	0;0	0;1	2;1	0;0	0;0	0;0
K	intron_retention		chr13	-	chr13:33101670-33111142				chr13:33101669-33101670;chr13:33111142-33111143		0;13	0;12	0;9	0;12	0;13	3;0	0;9	0;8
K	intron_retention	LCP1	chr13	-	chr13:46727081-46728939				chr13:46727080-46727081;chr13:46728939-46728940		695;0	626;2	577;0	563;0	881;0	1141;0	1001;0	1720;7
N	jcn_only_AD	TFDP1	chr13	+	chr13:114239046-114240088	chr13:114239204-114240088		chr13:114239046-114239203	chr13:114239045-114239046		0;8	0;2	2;14	0;0	6;15	0;7	6;25	0;6
K	intron_retention	ARGLU1	chr13	-	chr13:107209480-107211779				chr13:107209479-107209480;chr13:107211779-107211780		10;36	19;22	30;21	22;21	44;35	33;15	31;24	27;14
N	intron_retention		chr13	-	chr13:49073593-49073756				chr13:49073592-49073593;chr13:49073756-49073757		0;4	0;0	0;2	0;2	2;0	0;0	0;3	0;0
K	jcn_only_AD	RB1	chr13	+	chr13:49047527-49050836	chr13:49050659-49050836		chr13:49047527-49050658	chr13:49047526-49047527		31;8	30;0	50;0	90;0	69;0	48;0	75;0	64;0
K	alternative_acceptor	ESD	chr13	-	chr13:47345632-47351590	chr13:47349828-47351590		chr13:47345632-47349827	chr13:47345631-47345632		45;2	19;1	67;1	51;1	92;2	50;2	75;1	66;2
K	jcn_only_AA	PSPC1	chr13	-	chr13:20251964-20304378	chr13:20283740-20304378					3;9	0;5	8;7	20;8	7;17	5;6	5;11	13;8
N	alternative_donor	RCBTB1	chr13	-	chr13:50123785-50125461	chr13:50123785-50123878		chr13:50123879-50125461	chr13:50125461-50125462		10;2	2;0	8;1	11;1	13;2	5;1	22;1	13;1
N	alternative_donor	RCBTB2	chr13	-	chr13:49064388-49070326	chr13:49064388-49066575		chr13:49066576-49070326	chr13:49070326-49070327		34;5	3;0	55;6	40;4	74;8	7;1	65;6	11;1
K	alternative_donor	MED4	chr13	-	chr13:48664555-48669195	chr13:48664555-48669089		chr13:48669090-48669195	chr13:48669195-48669196		3;5	5;3	0;13	3;14	9;14	2;9	22;14	13;13
K	intron_retention	RPL21	chr13	+	chr13:27829492-27830320				chr13:27829491-27829492;chr13:27830320-27830321		424;0	207;0	490;2	149;0	635;0	182;0	592;2	203;2
K	cassette	ANKRD10	chr13	-	chr13:111545611-111558379	chr13:111545611-111546455;chr13:111546550-111558379		chr13:111546456-111546549			19;7	14;10	26;7	8;17	24;10	11;12	25;8	24;19
K	intron_retention	LACC1,RP11-65B7.2	chr13	+	chr13:44464411-44465584				chr13:44464410-44464411;chr13:44465584-44465585		39;3	5;0	274;13	92;6	107;8	44;2	119;7	56;6
K	intron_retention	NHLRC3	chr13	+	chr13:39613849-39618226				chr13:39613848-39613849;chr13:39618226-39618227		9;0	9;2	16;0	28;3	15;3	39;6	23;0	36;2
K	jcn_only_AA	DCUN1D2	chr13	-	chr13:114115452-114128438	chr13:114117207-114128438					0;0	0;0	2;0	0;0	6;0	0;0	0;2	0;0
N	cassette	VPS36	chr13	-	chr13:52991277-52997708	chr13:52991277-52992126;chr13:52992192-52997708		chr13:52992127-52992191			3;19	0;9	0;25	0;17	0;32	0;17	0;29	0;18
K	intron_retention	UPF3A	chr13	+	chr13:115048419-115051776				chr13:115048418-115048419;chr13:115051776-115051777		2;0	0;0	5;0	0;0	7;5	2;0	2;2	6;2
K	jcn_only_AA	CHAMP1	chr13	+	chr13:115086708-115089265	chr13:115086708-115089262		chr13:115089263-115089265	chr13:115089265-115089266		0;3	2;6	3;11	0;5	0;6	0;6	0;9	0;9
N	jcn_only_AA		chr13	+	chr13:44453880-44455087	chr13:44453880-44454051		chr13:44454052-44455087	chr13:44455087-44455088		0;0	0;0	8;2	0;0	0;0	3;0	8;6	3;0
K	intron_retention	MYCBP2-AS1	chr13	+	chr13:77657248-77661686				chr13:77657247-77657248;chr13:77661686-77661687		0;19	0;15	0;20	0;18	2;32	0;31	0;28	2;24
K	intron_retention	ATP11A	chr13	+	chr13:113532618-113536189				chr13:113532617-113532618;chr13:113536189-113536190		5;6	5;3	9;10	0;3	2;11	3;8	0;10	6;10
N	jcn_only_AA		chr13	-	chr13:49089878-49109818	chr13:49098894-49109818					6;0	0;0	0;17	0;0	0;9	0;0	0;14	0;0
K	intron_retention	IRG1	chr13	+	chr13:77522706-77526623				chr13:77522705-77522706;chr13:77526623-77526624		0;0	185;11	0;0	590;28	0;0	1105;45	0;0	1036;84
K	alternative_first_exon	TSC22D1	chr13	-	chr13:45010232-45147298	chr13:45010232-45010639	chr13:45147299-45150701	chr13:45010640-45010981			7;35	4;46	10;15	8;118	9;20	9;80	10;21	13;94
K	intron_retention	MPHOSPH8	chr13	+	chr13:20244504-20245345				chr13:20244503-20244504;chr13:20245345-20245346		14;2	3;3	6;0	7;0	19;2	9;0	13;0	7;2
K	alternative_last_exon	ZDHHC20	chr13	-	chr13:21950795-21955572	chr13:21952878-21955572	chr13:21946712-21950794	chr13:21952800-21952877			29;2	29;4	53;4	22;2	49;6	24;1	39;10	25;6
N	jcn_only_AA	IRG1	chr13	+	chr13:77527825-77529453	chr13:77527825-77528000		chr13:77528001-77529453	chr13:77529453-77529454		0;0	136;0	0;0	366;11	0;0	742;11	0;0	840;0
K	alternative_first_exon	N4BP2L2,RNF6	chr13	-	chr13:26795468-26795971;chr13:26795468-26796139	chr13:26795468-26795918	chr13:26796140-26796630	chr13:26795919-26795979			4;3	4;3	17;4	10;5	9;7	6;5	12;3	6;7
K	alternative_donor	NHLRC3	chr13	+	chr13:39612603-39613272	chr13:39612861-39613272		chr13:39612603-39612860	chr13:39612602-39612603		2;23	0;25	2;40	0;85	0;60	0;96	0;54	0;91
N	intron_retention		chr13	+	chr13:44463119-44465584				chr13:44463118-44463119;chr13:44465584-44465585		5;3	3;0	22;16	9;10	11;11	8;0	0;11	5;6
K	alternative_last_exon	N4BP2L1	chr13	-	chr13:32994714-33002040;chr13:32981910-33002040	chr13:33000093-33002040	chr13:32994508-32994713;chr13:32981782-32981909	chr13:32999495-33000092			13;1	70;8	8;3	69;14	13;4	61;6	10;1	75;8
K	alternative_acceptor	RBM26	chr13	-	chr13:79939854-79940189	chr13:79939869-79940189		chr13:79939854-79939868	chr13:79939853-79939854		11;0	13;0	14;0	8;0	24;3	9;0	15;0	14;0
N	intron_retention	EPSTI1	chr13	-	chr13:43544807-43550028				chr13:43544806-43544807;chr13:43550028-43550029		0;0	0;0	0;0	7;19	0;0	0;0	0;0	0;3
K	jcn_only_AA	CARKD	chr13	+	chr13:111289597-111290724	chr13:111289597-111290588		chr13:111290589-111290724	chr13:111290724-111290725		10;0	5;0	9;0	10;0	10;0	2;0	8;2	9;0
K	alternative_first_exon	LACC1	chr13	+	chr13:44454118-44455087,chr13:44453880-44455087,chr13:44454252-44455087;chr13:44453871-44455087	chr13:44454256-44455087	chr13:44453420-44453870	chr13:44453969-44454255			6;27	1;2	61;253	15;67	32;55	10;20	41;75	11;34
N	jcn_only_AD	MTIF3	chr13	-	chr13:49810098-49821770	chr13:49810098-49821594					0;0	0;0	0;0	0;0	0;0	0;0	3;0	0;3
K	alternative_acceptor	WDFY2	chr13	+	chr13:52325552-52329493	chr13:52325552-52326998		chr13:52326999-52329493	chr13:52329493-52329494		7;2	0;2	13;3	26;9	23;5	18;4	25;4	27;4
K	cassette	CARS2	chr13	-	chr13:111294869-111296731	chr13:111294869-111296411;chr13:111296530-111296731		chr13:111296412-111296529			20;2	11;1	23;3	7;1	35;2	7;2	41;3	7;2
K	coord_cassette	IFT88	chr13	+	chr13:21141396-21148518	chr13:21141396-21141808;chr13:21141925-21142023;chr13:21142137-21148518		chr13:21141809-21141924;chr13:21142024-21142136			3;0	0;0	2;0	3;0	7;0	0;0	2;0	0;1
N	jcn_only_AA	EPSTI1	chr13	-	chr13:43469245-43474445	chr13:43471681-43474445		chr13:43469245-43471680	chr13:43469244-43469245		20;0	155;5	27;0	435;8	19;0	401;0	31;0	481;0
K	alternative_donor	N4BP2L2	chr13	-	chr13:33096408-33101594	chr13:33096408-33101544		chr13:33101545-33101594	chr13:33101594-33101595		0;10	0;8	0;15	0;18	2;17	0;9	5;14	5;13
K	intron_retention	RB1	chr13	+	chr13:49050659-49050836				chr13:49050658-49050659;chr13:49050836-49050837		8;18	0;0	0;41	0;9	0;60	0;2	0;55	0;2
K	jcn_only_AA	ALG5	chr13	-	chr13:37563693-37569125	chr13:37567810-37569125					0;22	0;8	0;44	0;11	8;52	2;11	0;66	0;23
N	jcn_only_AD	IFT88	chr13	+	chr13:21205242-21212470	chr13:21210374-21212470		chr13:21205242-21210373	chr13:21205241-21205242		5;0	5;0	5;0	0;2	5;0	0;0	5;0	6;0
K	intron_retention	ANKRD10	chr13	-	chr13:111545611-111558379				chr13:111545610-111545611;chr13:111558379-111558380		19;6	14;15	26;14	8;14	24;14	11;15	25;8	24;18
N	cassette	RP11-65B7.2	chr13	+	chr13:44463119-44465584	chr13:44463119-44464139;chr13:44464411-44465584		chr13:44464140-44464410			5;41	3;10	22;237	9;88	11;112	8;42	0;111	5;56
K	alternative_last_exon	USP12	chr13	-	chr13:27690734-27745728	chr13:27744467-27745728	chr13:27690653-27690733	chr13:27744228-27744466			9;0	12;1	15;1	30;2	12;2	16;1	8;2	11;1
K	jcn_only_AA	SUPT20H	chr13	-	chr13:37596218-37598171;chr13:37596455-37598171	chr13:37597182-37598171		chr13:37596218-37596454;chr13:37596455-37597181	chr13:37596217-37596218;chr13:37596454-37596455		13;2	5;5	14;0	16;10	17;7	10;5	22;9	15;11
K	cassette	SUPT20H	chr13	-	chr13:37583947-37586328	chr13:37583947-37584688;chr13:37584793-37586328		chr13:37584689-37584792			8;1	3;4	14;0	7;4	20;5	14;2	19;3	11;4
K	intron_retention	N4BP2L1	chr13	-	chr13:32981476-32981781				chr13:32981475-32981476;chr13:32981781-32981782		19;0	66;3	9;0	58;0	15;2	53;2	22;0	55;2
N	jcn_only_AA	MYCBP2	chr13	-	chr13:77730338-77732071	chr13:77730860-77732071		chr13:77730338-77730859	chr13:77730337-77730338		6;0	8;0	16;0	11;0	19;0	13;0	30;0	22;2
K	cassette	TNFSF13B	chr13	+	chr13:108922773-108955600	chr13:108922773-108939150;chr13:108939208-108955600		chr13:108939151-108939207			0;24	11;102	0;23	27;325	5;38	32;302	3;34	18;362
N	jcn_only_AD	IRG1	chr13	+	chr13:77523720-77526623;chr13:77523722-77526623;chr13:77522706-77526623;chr13:77526454-77526623	chr13:77523726-77526623		chr13:77522706-77523719;chr13:77523720-77523721;chr13:77523722-77523725;chr13:77523726-77526453	chr13:77522705-77522706;chr13:77523719-77523720;chr13:77523721-77523722;chr13:77523725-77523726		0;0	200;0	0;0	613;0	0;0	1173;0	0;0	1115;5
N	intron_retention	EPSTI1	chr13	-	chr13:43469245-43471457				chr13:43469244-43469245;chr13:43471457-43471458		0;0	0;0	0;0	3;3	0;0	0;2	0;0	0;3
N	jcn_only_AA	CARKD,TNFSF13B	chr13	+	chr13:108922583-108922687	chr13:108922583-108922672		chr13:108922673-108922687	chr13:108922687-108922688		25;0	130;0	41;0	435;8	60;0	443;6	42;0	564;9
N	jcn_only_AD	RCBTB1	chr13	-	chr13:50123785-50125461	chr13:50123785-50123878		chr13:50123879-50125461	chr13:50125461-50125462		10;3	2;0	8;0	11;0	13;3	5;0	22;0	13;0
K	intron_retention	N4BP2L1	chr13	-	chr13:32978409-32981386				chr13:32978408-32978409;chr13:32981386-32981387		6;2	13;5	0;2	19;2	8;0	22;3	3;0	20;2
K	alternative_acceptor	TDRD3,TFDP1	chr13	+	chr13:114240165-114265310	chr13:114240165-114240280		chr13:114240281-114265310	chr13:114265310-114265311		8;0	13;0	27;0	10;0	39;0	9;0	60;0	18;0
N	jcn_only_AD	ZMYM2	chr13	+	chr13:20641531-20656155	chr13:20646064-20656155		chr13:20641531-20646063	chr13:20641530-20641531		22;0	13;0	25;0	24;0	10;0	27;7	16;0	39;0
N	intron_retention	IRG1	chr13	+	chr13:77527825-77528000				chr13:77527824-77527825;chr13:77528000-77528001		0;0	0;5	0;0	11;7	0;0	11;13	0;0	0;14
K	alternative_acceptor	CARKD	chr13	+	chr13:111289597-111290724	chr13:111289597-111290588		chr13:111290589-111290724	chr13:111290724-111290725		10;2	5;0	9;3	10;2	10;2	2;1	8;2	9;1
K	intron_retention	UPF3A	chr13	+	chr13:115051876-115051993				chr13:115051875-115051876;chr13:115051993-115051994		8;0	0;0	14;2	6;0	9;2	6;0	8;0	6;0
K	intron_retention	LCP1	chr13	-	chr13:46718656-46721042				chr13:46718655-46718656;chr13:46721042-46721043		1020;0	956;0	728;0	835;2	1141;0	1367;0	1456;0	2144;4
K	intron_retention	CARKD	chr13	+	chr13:111286943-111287018				chr13:111286942-111286943;chr13:111287018-111287019		5;0	10;0	7;5	11;0	14;4	6;2	14;2	11;0
N	jcn_only_AD	N4BP2L2	chr13	-	chr13:33101670-33109905;chr13:33101670-33112819	chr13:33101670-33111142		chr13:33109906-33111142;chr13:33111143-33112819	chr13:33111142-33111143;chr13:33112819-33112820		20;0	10;0	26;0	25;0	33;0	11;3	28;0	23;0
K	alternative_acceptor	PHF11	chr13	+	chr13:50100595-50102646	chr13:50100595-50101341		chr13:50101342-50102646	chr13:50102646-50102647		16;1	41;2	25;1	93;5	19;1	69;2	31;1	66;5
N	intron_retention		chr13	+	chr13:77527817-77529453				chr13:77527816-77527817;chr13:77529453-77529454		0;0	0;6	0;0	3;58	0;0	14;115	0;0	25;133
K	jcn_only_AD	RP11-29G8.3,UCHL3	chr13	+	chr13:76123807-76124111	chr13:76123999-76124111		chr13:76123807-76123998	chr13:76123806-76123807		0;8	0;0	0;19	0;3	2;24	0;3	2;33	0;6
K	intron_retention	CARKD	chr13	+	chr13:111289597-111290724				chr13:111289596-111289597;chr13:111290724-111290725		10;0	5;0	9;4	10;0	10;0	2;0	8;0	9;0
N	jcn_only_AD		chr13	-	chr13:49098894-49109818	chr13:49098894-49107163		chr13:49107164-49109818	chr13:49109818-49109819		0;11	0;0	17;10	0;13	9;9	0;2	14;14	0;5
K	intron_retention	N4BP2L1	chr13	-	chr13:32978535-32981386				chr13:32978534-32978535;chr13:32981386-32981387		8;2	40;6	5;2	32;4	10;0	28;5	6;0	28;2
K	cassette	DGKH	chr13	+	chr13:42793931-42803234	chr13:42793931-42795399;chr13:42795531-42803234		chr13:42795400-42795530			0;1	2;0	0;2	7;0	2;0	2;1	0;0	0;0
K	cassette	PCCA	chr13	+	chr13:101101560-101179928	chr13:101101560-101167680;chr13:101167822-101179928		chr13:101167681-101167821			0;5	0;2	0;8	0;1	2;11	0;2	0;11	0;3
K	jcn_only_AD	N4BP2L2	chr13	-	chr13:33096408-33101594	chr13:33096408-33101544		chr13:33101545-33101594	chr13:33101594-33101595		0;15	0;11	0;22	0;22	2;28	0;10	5;19	5;19
K	intron_retention	RCBTB2	chr13	-	chr13:49084908-49085905				chr13:49084907-49084908;chr13:49085905-49085906		41;6	0;0	40;13	20;4	49;10	19;3	48;14	11;0
K	intron_retention	ANKRD10	chr13	-	chr13:111546550-111558379				chr13:111546549-111546550;chr13:111558379-111558380		0;7	0;19	0;10	0;16	0;16	0;14	0;6	8;28
N	intron_retention		chr13	+	chr13:77572221-77574592				chr13:77572220-77572221;chr13:77574592-77574593		0;0	0;2	0;0	0;3	5;0	5;2	0;0	0;0
N	intron_retention		chr13	+	chr13:50050835-50050928				chr13:50050834-50050835;chr13:50050928-50050929		0;11	0;0	0;9	0;9	0;20	0;4	2;14	0;2
K	jcn_only_AA	TDRD3	chr13	+	chr13:61013907-61018820	chr13:61013907-61018816		chr13:61018817-61018820	chr13:61018820-61018821		0;3	0;6	10;36	3;18	3;8	0;2	0;8	0;5
K	intron_retention	BIVM-ERCC5,ERCC5	chr13	+	chr13:103506223-103506637				chr13:103506222-103506223;chr13:103506637-103506638		15;2	18;0	19;3	11;2	32;0	10;0	16;6	22;0
N	alternative_donor		chr13	-	chr13:49098894-49109818	chr13:49098894-49107163		chr13:49107164-49109818	chr13:49109818-49109819		0;0	0;0	17;2	0;0	9;1	0;0	14;0	0;0
N	jcn_only_AD	TSC22D1	chr13	-	chr13:49089878-49109818	chr13:49089878-49096033		chr13:49096034-49109818	chr13:49109818-49109819		6;20	0;0	0;31	0;14	0;32	0;3	0;26	0;5
K	intron_retention	N4BP2L1	chr13	-	chr13:32977338-32978457				chr13:32977337-32977338;chr13:32978457-32978458		20;0	44;7	7;0	66;2	6;0	53;2	10;0	43;0
K	alternative_donor	MTIF3	chr13	-	chr13:28019294-28024200;chr13:28019294-28024645	chr13:28019294-28024278		chr13:28024201-28024278;chr13:28024279-28024645	chr13:28024278-28024279;chr13:28024645-28024646		6;0	5;0	8;1	6;1	16;1	5;1	13;2	9;0
K	alternative_acceptor	SUPT20H	chr13	-	chr13:37596218-37598171;chr13:37596455-37598171	chr13:37597182-37598171		chr13:37596218-37596454;chr13:37596455-37597181	chr13:37596217-37596218;chr13:37596454-37596455		13;5	6;5	20;4	17;8	19;11	11;6	23;8	16;8
N	cassette	TMCO3	chr13	+	chr13:114152837-114156066	chr13:114152837-114154272;chr13:114154465-114156066		chr13:114154273-114154464			0;55	0;26	0;52	0;28	2;96	0;44	0;89	0;57
K	intron_retention	N4BP2L1	chr13	-	chr13:32981910-32990095				chr13:32981909-32981910;chr13:32990095-32990096		0;0	0;2	2;0	0;7	0;0	0;0	0;0	0;0
K	cassette	NEK3	chr13	-	chr13:52711039-52718050	chr13:52711039-52715155;chr13:52715206-52718050		chr13:52715156-52715205			0;4	0;0	0;2	3;4	0;4	0;7	0;4	0;2
N	jcn_only_AD	N4BP2L2	chr13	-	chr13:33101670-33112819;chr13:33101670-33111142	chr13:33101670-33109905		chr13:33109906-33111142;chr13:33111143-33112819	chr13:33111142-33111143;chr13:33112819-33112820		0;20	0;10	0;26	3;22	0;33	3;11	0;28	0;23
K	jcn_only_AA	PCID2	chr13	-	chr13:113832291-113832487	chr13:113832323-113832487		chr13:113832291-113832322	chr13:113832290-113832291		3;0	0;0	3;2	0;0	0;7	0;0	5;2	0;2
K	cassette	SPRYD7	chr13	-	chr13:50502222-50510265	chr13:50502222-50505153;chr13:50505271-50510265		chr13:50505154-50505270			0;6	0;3	0;8	0;6	0;16	0;4	0;14	2;5
K	alternative_acceptor	TDRD3	chr13	+	chr13:61141785-61147749	chr13:61141785-61147746		chr13:61147747-61147749	chr13:61147749-61147750		2;6	0;2	16;17	9;4	0;0	0;1	3;4	2;0
K	intron_retention	NHLRC3	chr13	+	chr13:39616443-39618226				chr13:39616442-39616443;chr13:39618226-39618227		15;0	13;2	31;0	63;3	36;5	88;3	38;3	69;2
K	alternative_donor	RP11-29G8.3,UCHL3	chr13	+	chr13:76123807-76124111	chr13:76123999-76124111		chr13:76123807-76123998	chr13:76123806-76123807		0;3	0;0	0;11	0;2	2;9	0;1	2;14	0;2
K	alternative_donor	RB1	chr13	+	chr13:49047527-49050836	chr13:49050659-49050836		chr13:49047527-49050658	chr13:49047526-49047527		31;2	30;3	50;2	90;4	69;3	48;2	75;2	64;2
N	jcn_only_AD	IRG1	chr13	+	chr13:77523720-77526623;chr13:77523722-77526623;chr13:77526454-77526623;chr13:77523726-77526623	chr13:77522706-77526623		chr13:77522706-77523719;chr13:77523720-77523721;chr13:77523722-77523725;chr13:77523726-77526453	chr13:77522705-77522706;chr13:77523719-77523720;chr13:77523721-77523722;chr13:77523725-77523726		0;0	15;185	0;0	23;590	0;0	68;1105	0;0	83;1036
K	cassette	PAN3	chr13	+	chr13:28752073-28794367	chr13:28752073-28771321;chr13:28771484-28794367		chr13:28771322-28771483			5;6	0;3	0;5	8;4	10;10	7;5	6;5	5;6
N	cassette	MTMR6	chr13	-	chr13:25823631-25825990	chr13:25823631-25825786;chr13:25825914-25825990		chr13:25825787-25825913			0;20	0;21	0;38	2;31	0;45	2;27	0;37	0;32
K	intron_retention	LPAR6	chr13	-	chr13:48986342-48986556				chr13:48986341-48986342;chr13:48986556-48986557		0;117	0;4	0;93	18;134	0;136	0;23	0;124	0;20
K	cassette	N4BP2L2	chr13	-	chr13:33018264-33091993	chr13:33018264-33054726;chr13:33054775-33091993		chr13:33054727-33054774			5;0	3;4	3;0	0;2	2;0	0;1	5;0	5;0
K	cassette	ARHGEF7	chr13	+	chr13:111930021-111932884	chr13:111930021-111932618;chr13:111932698-111932884		chr13:111932619-111932697			0;11	0;7	0;14	0;16	0;14	0;11	2;12	0;18
N	jcn_only_AD	ZMYM2	chr13	+	chr13:20533276-20534097;chr13:20532982-20534097	chr13:20533100-20534097		chr13:20532982-20533099;chr13:20533100-20533275	chr13:20532981-20532982;chr13:20533099-20533100		0;0	3;2	0;0	15;2	5;2	7;0	6;0	11;0
K	intron_retention	TPT1	chr13	-	chr13:45914921-45915176				chr13:45914920-45914921;chr13:45915176-45915177		1614;0	992;0	1989;3	1427;3	3134;2	1634;0	1813;0	1597;3
K	jcn_only_AA	CHAMP1,TPP2	chr13	+	chr13:103301837-103309405	chr13:103301837-103303708					16;9	10;0	22;0	7;0	43;0	15;0	28;5	8;3
K	intron_retention	N4BP2L2	chr13	-	chr13:33096408-33101594				chr13:33096407-33096408;chr13:33101594-33101595		0;6	0;7	0;10	0;16	2;13	0;10	5;7	5;10
K	cassette	NHLRC3	chr13	+	chr13:39613849-39618226	chr13:39613849-39616241;chr13:39616443-39618226		chr13:39616242-39616442			9;17	9;19	16;32	28;79	15;53	39;89	23;41	36;83
N	alternative_donor	TFDP1	chr13	+	chr13:114292200-114294434	chr13:114292212-114294434		chr13:114292200-114292211	chr13:114292199-114292200		6;11	0;3	15;13	5;13	23;45	7;6	24;43	8;15
K	intron_retention	ZMYM2	chr13	+	chr13:20567705-20567965				chr13:20567704-20567705;chr13:20567965-20567966		0;4	0;7	0;5	0;10	0;7	0;12	6;6	0;15
N	alternative_donor	IFT88	chr13	+	chr13:21205242-21212470	chr13:21210374-21212470		chr13:21205242-21210373	chr13:21205241-21205242		5;0	5;0	5;0	0;0	5;0	0;0	5;0	6;0
K	jcn_only_AD	N4BP2L2	chr13	-	chr13:33111165-33112914	chr13:33111165-33112754		chr13:33112755-33112914	chr13:33112914-33112915		0;11	1;9	0;17	0;23	0;19	2;18	2;34	0;25
N	alternative_acceptor	TDRD3,UFM1	chr13	+	chr13:38933471-38934847	chr13:38933471-38934177		chr13:38934178-38934847	chr13:38934847-38934848		17;5	9;2	43;4	35;3	48;8	25;3	47;7	28;3
K	intron_retention	SPATA13	chr13	+	chr13:24874614-24876735				chr13:24874613-24874614;chr13:24876735-24876736		11;0	10;0	15;0	15;0	16;0	17;0	8;0	20;5
K	cassette	NUP58	chr13	+	chr13:25882087-25887020	chr13:25882087-25883384;chr13:25883421-25887020		chr13:25883385-25883420			0;12	2;10	0;24	0;26	0;33	3;16	0;30	0;28
K	jcn_only_AA	PHF11	chr13	+	chr13:50100595-50102646	chr13:50100595-50101341		chr13:50101342-50102646	chr13:50102646-50102647		16;0	41;2	25;0	93;0	19;0	69;0	31;0	66;0
K	alternative_first_exon	FNDC3A	chr13	+	chr13:49649501-49688790	chr13:49684543-49688790	chr13:49649425-49649500	chr13:49684449-49684542			32;0	9;2	18;8	16;4	14;6	12;5	10;10	12;7
N	alternative_donor	LACC1	chr13	+	chr13:44456500-44457906	chr13:44457250-44457906		chr13:44456500-44457249	chr13:44456499-44456500		56;2	8;1	380;8	128;6	148;4	55;1	125;4	78;3
N	cassette	AKAP11	chr13	+	chr13:42882746-42888029	chr13:42882746-42887182;chr13:42887267-42888029		chr13:42887183-42887266			14;3	0;3	17;9	5;5	14;6	0;4	11;11	7;4
K	jcn_only_AA	CCNA1	chr13	+	chr13:37006867-37007172	chr13:37006867-37007169		chr13:37007170-37007172	chr13:37007172-37007173		2;0	0;0	0;0	39;63	0;0	0;5	0;0	6;0
K	intron_retention	TNFSF13B	chr13	+	chr13:108939208-108955123				chr13:108939207-108939208;chr13:108955123-108955124		0;0	0;2	0;0	0;9	0;0	8;6	0;0	24;9
N	jcn_only_AD	TDRD3	chr13	+	chr13:61109368-61141658	chr13:61121626-61141658		chr13:61109368-61121625	chr13:61109367-61109368		11;0	6;0	56;7	27;0	6;0	0;0	9;0	2;0
K	intron_retention	SETDB2	chr13	+	chr13:50059860-50062425				chr13:50059859-50059860;chr13:50062425-50062426		26;3	7;0	30;0	27;0	33;5	10;0	31;2	3;0
K	intron_retention	MTIF3	chr13	-	chr13:28011411-28014125				chr13:28011410-28011411;chr13:28014125-28014126		17;0	20;0	30;2	19;0	47;2	14;0	44;0	30;0
K	intron_retention	CLN5	chr13	+	chr13:77570263-77574592				chr13:77570262-77570263;chr13:77574592-77574593		22;2	20;2	44;0	70;3	56;0	59;0	31;2	80;0
K	intron_retention	PHF11	chr13	+	chr13:50095077-50096178				chr13:50095076-50095077;chr13:50096178-50096179		11;2	47;2	23;0	75;6	25;0	78;6	31;0	76;2
K	cassette	USPL1	chr13	+	chr13:31192194-31195900	chr13:31192194-31195209;chr13:31195377-31195900		chr13:31195210-31195376			0;3	0;3	0;2	0;3	0;6	0;3	7;4	0;1
K	intron_retention	VPS36	chr13	-	chr13:52990059-52990151				chr13:52990058-52990059;chr13:52990151-52990152		15;0	7;0	27;0	23;2	44;2	7;0	36;0	8;0
K	intron_retention	TPT1	chr13	-	chr13:45911689-45912794				chr13:45911688-45911689;chr13:45912794-45912795		0;2	8;0	0;5	13;2	9;0	0;2	6;0	6;2
N	jcn_only_AA	SETDB2	chr13	+	chr13:50055253-50056872	chr13:50055253-50056166		chr13:50056167-50056872	chr13:50056872-50056873		39;0	0;0	27;2	33;0	45;0	14;0	25;0	6;0
K	alternative_donor	MYCBP2	chr13	-	chr13:77644847-77650894	chr13:77644847-77650885		chr13:77650886-77650894	chr13:77650894-77650895		9;6	0;8	0;5	11;6	14;7	14;8	14;5	9;9
K	jcn_only_AA	TDRD3,TFDP1	chr13	+	chr13:114240165-114265310	chr13:114240165-114240280		chr13:114240281-114265310	chr13:114265310-114265311		8;0	13;2	27;0	10;0	39;0	9;0	60;0	18;0
N	jcn_only_AA	LACC1	chr13	+	chr13:44453871-44455087	chr13:44453871-44454051		chr13:44454052-44455087	chr13:44455087-44455088		14;0	0;0	24;0	11;0	41;3	10;0	38;0	22;0
K	alternative_donor	COMMD6,TPT1	chr13	-	chr13:45914320-45915176	chr13:45914320-45914846		chr13:45914847-45915176	chr13:45915176-45915177		0;564	0;326	11;505	2;346	0;814	0;429	8;539	0;389
K	intron_retention	NHLRC3	chr13	+	chr13:39613849-39616241				chr13:39613848-39613849;chr13:39616241-39616242		10;2	8;0	20;3	59;3	34;0	63;6	22;0	50;4
N	alternative_donor	N4BP2L2	chr13	-	chr13:33101670-33109905;chr13:33101670-33111142	chr13:33101670-33112819		chr13:33109906-33111142;chr13:33111143-33112819	chr13:33111142-33111143;chr13:33112819-33112820		18;0	13;0	18;0	21;3	23;0	14;0	19;0	18;0
N	alternative_donor	IRG1	chr13	+	chr13:77523722-77526623;chr13:77522706-77526623;chr13:77526454-77526623;chr13:77523726-77526623	chr13:77523720-77526623		chr13:77522706-77523719;chr13:77523720-77523721;chr13:77523722-77523725;chr13:77523726-77526453	chr13:77522705-77522706;chr13:77523719-77523720;chr13:77523721-77523722;chr13:77523725-77523726		0;0	218;1	0;0	654;1	0;0	1219;5	0;0	1166;1
N	intron_retention		chr13	+	chr13:77526786-77529453				chr13:77526785-77526786;chr13:77529453-77529454		0;0	0;4	0;0	0;7	0;0	0;14	0;0	5;14
K	jcn_only_AA	PSPC1	chr13	-	chr13:20249125-20251863	chr13:20249794-20251863					0;2	0;0	6;5	0;7	0;7	6;5	2;2	0;6
N	jcn_only_AD	SPATA13	chr13	+	chr13:24874614-24876735	chr13:24875790-24876735		chr13:24874614-24875789	chr13:24874613-24874614		11;0	10;0	15;0	15;0	16;0	17;0	8;0	20;3
K	alternative_last_exon	N4BP2L1	chr13	-	chr13:33000093-33002040;chr13:32981910-33002040	chr13:32994714-33002040	chr13:32999495-33000092;chr13:32981782-32981909	chr13:32994508-32994713			14;0	74;4	10;1	77;6	16;1	64;3	11;0	77;6
K	jcn_only_AD	UBAC2	chr13	+	chr13:99896879-99966350	chr13:99965642-99966350		chr13:99896879-99965641	chr13:99896878-99896879		19;0	16;0	18;0	23;0	33;0	34;0	47;10	28;0
K	jcn_only_AD	ZDHHC20	chr13	-	chr13:21950795-21955572	chr13:21950795-21952799					22;0	28;9	28;0	16;0	34;0	16;0	20;2	26;6
K	intron_retention	PCID2	chr13	-	chr13:113832323-113832487				chr13:113832322-113832323;chr13:113832487-113832488		0;5	0;4	2;6	0;3	7;3	0;6	2;11	2;3
K	cassette	SUPT20H	chr13	-	chr13:37622074-37625624	chr13:37622074-37622700;chr13:37622737-37625624		chr13:37622701-37622736			0;8	0;5	0;13	5;10	0;13	2;6	0;16	9;9
K	cassette	SUGT1	chr13	+	chr13:53233385-53236783	chr13:53233385-53235609;chr13:53235706-53236783		chr13:53235610-53235705			8;9	6;10	25;15	17;12	31;19	19;15	30;11	20;11
K	intron_retention	HSPH1	chr13	-	chr13:31725880-31726988				chr13:31725879-31725880;chr13:31726988-31726989		24;3	24;0	89;0	61;2	86;0	28;0	108;0	47;0
N	jcn_only_AA	VPS36	chr13	-	chr13:53001355-53007796	chr13:53003568-53007796		chr13:53001355-53003567	chr13:53001354-53001355		24;0	8;0	32;0	8;0	33;3	14;0	26;0	18;0
N	alternative_donor	SPATA13	chr13	+	chr13:24874614-24876735	chr13:24875790-24876735		chr13:24874614-24875789	chr13:24874613-24874614		11;1	10;2	15;2	15;2	16;2	17;4	8;3	20;6
N	jcn_only_AD	IRG1	chr13	+	chr13:77523720-77526623;chr13:77523722-77526623;chr13:77522706-77526623;chr13:77523726-77526623	chr13:77526454-77526623		chr13:77522706-77523719;chr13:77523720-77523721;chr13:77523722-77523725;chr13:77523726-77526453	chr13:77522705-77522706;chr13:77523719-77523720;chr13:77523721-77523722;chr13:77523725-77523726		0;0	200;0	0;0	613;0	0;0	1173;0	0;0	1117;2
K	intron_retention	ANKRD10	chr13	-	chr13:111545611-111546455				chr13:111545610-111545611;chr13:111546455-111546456		0;13	0;16	8;10	9;14	2;11	6;16	0;13	2;16
K	intron_retention	PHF11	chr13	+	chr13:50100595-50102646				chr13:50100594-50100595;chr13:50102646-50102647		16;0	41;0	25;2	93;2	19;0	69;0	31;0	66;2
K	alternative_first_exon	N4BP2L1,N4BP2L2	chr13	-	chr13:32981910-33002040	chr13:32981910-32990095	chr13:33002041-33002315	chr13:32990096-32990166			9;0	37;1	6;1	42;3	10;0	36;1	7;0	46;0
K	alternative_donor	SUPT20H	chr13	-	chr13:37625721-37633695	chr13:37625721-37633616		chr13:37633617-37633695	chr13:37633695-37633696		2;1	2;0	0;0	6;0	10;1	6;1	11;0	6;1
N	jcn_only_AA		chr13	+	chr13:114175049-114193074	chr13:114175049-114188359		chr13:114188360-114193074	chr13:114193074-114193075		0;32	0;8	0;33	0;15	0;42	2;26	0;45	0;32
N	cassette	TPP2	chr13	+	chr13:103317276-103326632	chr13:103317276-103320107;chr13:103320234-103326632		chr13:103320108-103320233			28;1	11;1	40;2	18;1	41;1	19;1	34;2	27;1
K	alternative_acceptor	SUPT20H	chr13	-	chr13:37596218-37598171;chr13:37597182-37598171	chr13:37596455-37598171		chr13:37596218-37596454;chr13:37596455-37597181	chr13:37596217-37596218;chr13:37596454-37596455		15;3	10;1	18;6	24;1	28;2	16;1	30;1	23;1
N	alternative_acceptor	STARD13	chr13	-	chr13:33692379-33700217	chr13:33692401-33700217		chr13:33692379-33692400	chr13:33692378-33692379		0;11	0;3	0;9	0;2	5;17	2;3	0;16	0;5
K	alternative_acceptor	TPT1	chr13	-	chr13:45911524-45912794	chr13:45911689-45912794		chr13:45911524-45911688	chr13:45911523-45911524		1993;4	1174;6	1560;5	1131;13	2651;7	1434;4	1600;4	1307;10
K	alternative_donor	UBAC2	chr13	+	chr13:99896879-99966350	chr13:99965642-99966350		chr13:99896879-99965641	chr13:99896878-99896879		19;3	16;1	18;3	23;7	33;2	34;2	47;2	28;4
K	jcn_only_AD	SUPT20H	chr13	-	chr13:37625721-37633695	chr13:37625721-37633616		chr13:37633617-37633695	chr13:37633695-37633696		2;2	2;0	0;0	6;0	10;3	6;0	11;0	6;0
K	cassette	ZDHHC20	chr13	-	chr13:21955689-21957058	chr13:21955689-21956039;chr13:21956085-21957058		chr13:21956040-21956084			0;0	0;0	0;3	0;1	0;1	0;2	6;2	0;0
K	cassette	EPSTI1	chr13	-	chr13:43543314-43566113	chr13:43543314-43544747;chr13:43544807-43566113		chr13:43544748-43544806			0;13	0;95	0;15	0;283	0;23	18;232	0;21	9;308
N	intron_retention		chr13	+	chr13:115049834-115051993				chr13:115049833-115049834;chr13:115051993-115051994		0;0	0;0	3;5	0;0	0;0	0;0	0;2	0;0
K	jcn_only_AD	TRIM13	chr13	+	chr13:50571268-50571802	chr13:50571353-50571802		chr13:50571268-50571352	chr13:50571267-50571268		2;7	3;3	6;0	3;8	5;6	2;2	2;3	9;7
K	alternative_donor	PDS5B	chr13	+	chr13:33338727-33344258	chr13:33338733-33344258		chr13:33338727-33338732	chr13:33338726-33338727		6;4	0;4	0;4	0;7	0;12	0;3	0;10	0;3
K	intron_retention	PHF11	chr13	+	chr13:50097378-50098220				chr13:50097377-50097378;chr13:50098220-50098221		15;0	57;0	24;0	102;5	40;0	81;3	34;0	97;0
K	cassette	EPSTI1	chr13	-	chr13:43491761-43500471	chr13:43491761-43493435;chr13:43493469-43500471		chr13:43493436-43493468			22;4	167;24	27;1	470;81	35;6	427;67	34;4	500;66
K	jcn_only_AA	SUPT20H	chr13	-	chr13:37597182-37598171;chr13:37596455-37598171	chr13:37596218-37598171		chr13:37596218-37596454;chr13:37596455-37597181	chr13:37596217-37596218;chr13:37596454-37596455		5;10	5;5	0;14	10;16	7;17	5;10	9;22	11;15
K	intron_retention	PHF11	chr13	+	chr13:50092288-50095029				chr13:50092287-50092288;chr13:50095029-50095030		17;2	40;8	40;2	90;14	36;0	80;4	24;2	99;10
K	alternative_acceptor	SUPT20H	chr13	-	chr13:37597182-37598171;chr13:37596455-37598171	chr13:37596218-37598171		chr13:37596218-37596454;chr13:37596455-37597181	chr13:37596217-37596218;chr13:37596454-37596455		8;10	6;5	10;14	9;16	13;17	7;10	9;22	9;15
K	intron_retention	TPP2	chr13	+	chr13:103297360-103298643				chr13:103297359-103297360;chr13:103298643-103298644		17;0	2;2	23;3	8;0	30;4	10;3	28;0	11;0
K	intron_retention	LAMP1	chr13	+	chr13:113976043-113976596				chr13:113976042-113976043;chr13:113976596-113976597		585;2	305;0	1722;5	1517;13	1852;5	1067;5	1152;2	888;5
K	alternative_acceptor	RBM26	chr13	-	chr13:79928697-79929354	chr13:79928706-79929354		chr13:79928697-79928705	chr13:79928696-79928697		2;3	0;4	7;0	10;5	8;5	5;0	2;7	7;8
K	intron_retention	EPSTI1	chr13	-	chr13:43543314-43544747				chr13:43543313-43543314;chr13:43544747-43544748		14;0	98;0	17;0	319;15	19;0	292;0	22;0	393;4
N	jcn_only_AA	RCBTB2	chr13	-	chr13:49070458-49073756	chr13:49073593-49073756		chr13:49070458-49073592	chr13:49070457-49070458		41;0	6;0	70;0	26;0	59;2	9;0	47;0	10;0
K	intron_retention	KIAA0226L	chr13	-	chr13:46924487-46930566				chr13:46924486-46924487;chr13:46930566-46930567		5;0	23;0	9;0	6;0	17;0	23;3	26;0	51;5
N	alternative_donor		chr13	+	chr13:44453871-44454051	chr13:44453880-44454051		chr13:44453871-44453879	chr13:44453870-44453871		0;0	0;0	0;1	0;0	3;0	0;0	0;3	0;0
N	alternative_acceptor	IRG1	chr13	+	chr13:77527825-77529453	chr13:77527825-77528000		chr13:77528001-77529453	chr13:77529453-77529454		0;0	136;8	0;0	366;14	0;0	742;30	0;0	840;28
N	jcn_only_AA	LACC1,RP11-65B7.2	chr13	+	chr13:44458073-44462892	chr13:44458073-44459054		chr13:44459055-44462892	chr13:44462892-44462893		68;0	9;0	416;0	149;0	201;0	63;0	206;14	108;0
N	alternative_donor	ZMYM2	chr13	+	chr13:20533276-20534097;chr13:20532982-20534097	chr13:20533100-20534097		chr13:20532982-20533099;chr13:20533100-20533275	chr13:20532981-20532982;chr13:20533099-20533100		0;0	3;1	0;0	10;1	6;1	8;1	6;0	10;0
N	alternative_donor	FNDC3A	chr13	+	chr13:49705507-49710467	chr13:49705511-49710467		chr13:49705507-49705510	chr13:49705506-49705507		0;22	0;8	0;21	2;17	0;17	0;16	0;16	0;22
K	alternative_last_exon	DHRS12	chr13	-	chr13:52343430-52345956	chr13:52345632-52345956	chr13:52342131-52343429	chr13:52344920-52345631			2;1	1;1	3;1	3;1	2;1	3;1	2;1	4;1
N	alternative_donor	N4BP2L2	chr13	-	chr13:33101670-33109905;chr13:33101670-33112819	chr13:33101670-33111142		chr13:33109906-33111142;chr13:33111143-33112819	chr13:33111142-33111143;chr13:33112819-33112820		18;0	13;0	18;0	24;0	23;0	14;0	19;0	18;0
N	intron_retention		chr13	+	chr13:77523722-77526623				chr13:77523721-77523722;chr13:77526623-77526624		0;0	15;18	0;0	23;34	0;0	61;55	0;0	76;114
K	intron_retention	IRG1	chr13	+	chr13:77527825-77529453				chr13:77527824-77527825;chr13:77529453-77529454		0;0	136;2	0;0	366;7	0;0	742;11	0;0	840;8
N	alternative_donor	ZMYM2	chr13	+	chr13:20533100-20534097;chr13:20532982-20534097	chr13:20533276-20534097		chr13:20532982-20533099;chr13:20533100-20533275	chr13:20532981-20532982;chr13:20533099-20533100		0;0	4;0	0;0	9;2	6;1	8;1	6;0	8;2
N	alternative_acceptor	SLC25A30	chr13	-	chr13:45970454-45973074	chr13:45971474-45973074		chr13:45970454-45971473	chr13:45970453-45970454		0;2	0;2	3;4	0;2	0;2	0;3	0;4	3;2
N	alternative_acceptor	LACC1,RP11-65B7.2	chr13	+	chr13:44458073-44462892	chr13:44458073-44459054		chr13:44459055-44462892	chr13:44462892-44462893		68;2	9;0	416;22	149;4	201;6	63;1	206;6	108;2
K	alternative_first_exon	CARKD	chr13	+	chr13:111267995-111274562	chr13:111268122-111274562	chr13:111267807-111267994	chr13:111268008-111268121			5;0	4;0	4;0	4;1	10;0	5;2	7;0	5;1
K	cassette	UPF3A	chr13	+	chr13:115057268-115067205	chr13:115057268-115064314;chr13:115064476-115067205		chr13:115064315-115064475			5;14	3;11	0;13	0;8	0;23	0;8	0;18	0;10
K	mutually_exclusive	DIS3	chr13	-	chr13:73352519-73355426,chr13:73355495-73355742	chr13:73352519-73354983,chr13:73355142-73355742	chr13:73355427-73355494	chr13:73354984-73355141			4;5	4;4	4;11	2;6	5;12	5;4	6;16	7;8
K	intron_retention	RCBTB2	chr13	-	chr13:49077051-49084764				chr13:49077050-49077051;chr13:49084764-49084765		18;14	0;0	38;21	11;5	27;10	14;0	23;11	2;2
K	intron_retention	N4BP2L2	chr13	-	chr13:33096408-33101544				chr13:33096407-33096408;chr13:33101544-33101545		15;7	11;3	22;6	22;12	28;12	10;7	19;0	19;8
K	jcn_only_AA	WDFY2	chr13	+	chr13:52325552-52329493	chr13:52325552-52326998		chr13:52326999-52329493	chr13:52329493-52329494		7;0	0;0	13;0	26;2	23;0	18;0	25;0	27;0
N	cassette	TMCO3	chr13	+	chr13:114193823-114202617	chr13:114193823-114201614;chr13:114201695-114202617		chr13:114201615-114201694			0;27	0;8	0;36	0;15	0;44	0;19	7;43	0;36
K	intron_retention	LAMP1	chr13	+	chr13:113975786-113975871				chr13:113975785-113975786;chr13:113975871-113975872		463;0	245;0	1106;7	1036;10	1103;4	626;5	751;5	677;0
N	alternative_donor	MTRF1	chr13	-	chr13:41800705-41808025	chr13:41800705-41801135		chr13:41801136-41808025	chr13:41808025-41808026		8;0	0;0	6;0	5;0	16;0	9;0	7;0	8;0
K	alternative_first_exon	ING1	chr13	+	chr13:111366633-111371575	chr13:111368356-111371575	chr13:111365625-111366632	chr13:111367329-111368355			1;0	1;0	1;0	1;0	3;2	1;0	2;1	2;1
K	jcn_only_AD	COMMD6,TPT1	chr13	-	chr13:45914320-45915176	chr13:45914320-45914846		chr13:45914847-45915176	chr13:45915176-45915177		0;1851	0;1047	11;1905	2;1275	0;3033	0;1635	8;2045	0;1488
K	intron_retention	RCBTB2	chr13	-	chr13:49070458-49073756				chr13:49070457-49070458;chr13:49073756-49073757		41;2	6;0	70;2	26;2	59;2	9;0	47;0	10;0
N	cassette	GPR180	chr13	+	chr13:95264645-95271721	chr13:95264645-95271403;chr13:95271585-95271721		chr13:95271404-95271584			0;5	0;11	0;15	3;57	2;17	0;41	0;12	0;32
N	cassette	IRG1	chr13	+	chr13:77526786-77529453	chr13:77526786-77527734;chr13:77527825-77529453		chr13:77527735-77527824			0;0	0;167	0;2	0;415	0;1	0;898	0;2	5;963
N	intron_retention	PHF11	chr13	+	chr13:50092288-50094054				chr13:50092287-50092288;chr13:50094054-50094055		0;2	0;9	0;4	2;14	0;0	0;9	0;2	0;7
N	alternative_donor	EPSTI1,RCBTB2	chr13	-	chr13:43544807-43566113	chr13:43544807-43550028		chr13:43550029-43566113	chr13:43566113-43566114		15;0	120;1	18;0	367;3	33;0	281;2	26;0	376;2
N	cassette	FBXL3	chr13	-	chr13:77592858-77600961	chr13:77592858-77595647;chr13:77595997-77600961		chr13:77595648-77595996			2;22	0;25	5;30	0;42	0;37	0;36	0;30	0;46
K	intron_retention	CARKD	chr13	+	chr13:111289597-111290588				chr13:111289596-111289597;chr13:111290588-111290589		0;0	0;0	0;2	0;0	0;2	0;0	2;0	0;0
K	intron_retention	SETDB2	chr13	+	chr13:50065047-50065867				chr13:50065046-50065047;chr13:50065867-50065868		19;0	0;0	35;4	28;2	34;0	7;0	19;0	7;0
K	jcn_only_AA	TDRD3	chr13	+	chr13:61141785-61147749	chr13:61141785-61147746		chr13:61147747-61147749	chr13:61147749-61147750		2;11	0;5	16;34	9;9	0;0	0;2	3;8	2;0
K	intron_retention	LAMP1	chr13	+	chr13:113976193-113976596				chr13:113976192-113976193;chr13:113976596-113976597		0;0	0;0	0;3	6;15	0;3	0;5	0;0	0;3
K	cassette	SETDB2	chr13	+	chr13:50035299-50041999	chr13:50035299-50038156;chr13:50038193-50041999		chr13:50038157-50038192			16;3	2;1	11;8	10;1	24;8	0;1	9;8	3;0
N	intron_retention		chr13	+	chr13:50039187-50041999				chr13:50039186-50039187;chr13:50041999-50042000		0;0	0;0	3;0	0;3	0;0	0;0	0;2	0;0
K	cassette	ZMYM2	chr13	+	chr13:20534167-20567202	chr13:20534167-20544164;chr13:20544212-20567202		chr13:20544165-20544211			0;1	5;2	9;3	6;3	5;3	11;1	7;2	16;1
K	jcn_only_AD	NHLRC3	chr13	+	chr13:39612603-39613272	chr13:39612861-39613272		chr13:39612603-39612860	chr13:39612602-39612603		2;10	0;15	2;24	0;80	0;53	0;99	0;49	0;73
N	alternative_acceptor	CARKD,TNFSF13B	chr13	+	chr13:108922583-108922687	chr13:108922583-108922672		chr13:108922673-108922687	chr13:108922687-108922688		25;0	130;2	41;0	435;10	60;0	443;10	42;0	564;8
N	cassette	NUP58	chr13	+	chr13:25905697-25912773	chr13:25905697-25911073;chr13:25911173-25912773		chr13:25911074-25911172			0;19	0;22	0;38	0;22	0;36	0;20	11;45	0;25
K	intron_retention	ANKRD10	chr13	-	chr13:111532460-111536044				chr13:111532459-111532460;chr13:111536044-111536045		13;5	17;9	23;6	18;6	18;5	26;9	26;2	19;9
K	jcn_only_AD	MTIF3	chr13	-	chr13:28019294-28024645;chr13:28019294-28024278	chr13:28019294-28024200		chr13:28024201-28024278;chr13:28024279-28024645	chr13:28024278-28024279;chr13:28024645-28024646		6;0	5;0	14;3	9;0	22;0	8;2	15;5	9;0
N	jcn_only_AD	MTRF1	chr13	-	chr13:41800705-41808025	chr13:41800705-41801135		chr13:41801136-41808025	chr13:41808025-41808026		8;0	0;0	6;0	5;0	16;0	9;0	7;0	8;2
K	intron_retention		chr13	-	chr13:33101670-33109905				chr13:33101669-33101670;chr13:33109905-33109906		20;2	10;2	26;0	22;6	33;2	11;0	28;0	23;0
N	alternative_acceptor		chr13	+	chr13:114175049-114193074	chr13:114175049-114188359		chr13:114188360-114193074	chr13:114193074-114193075		0;3	0;1	0;3	0;2	0;5	2;2	0;4	0;3
K	cassette	EPSTI1	chr13	-	chr13:43462639-43469144	chr13:43462639-43463346;chr13:43463379-43469144		chr13:43463347-43463378			13;1	84;9	17;1	239;32	23;1	249;18	11;0	305;23
K	intron_retention	PCID2	chr13	-	chr13:113832291-113832487				chr13:113832290-113832291;chr13:113832487-113832488		3;5	0;2	3;7	0;4	0;6	0;6	5;13	0;4
K	intron_retention	SLC25A30	chr13	-	chr13:45970151-45971392				chr13:45970150-45970151;chr13:45971392-45971393		9;2	13;0	15;0	19;0	25;0	24;4	27;3	13;5
N	alternative_donor	ITM2B	chr13	+	chr13:48807614-48827943	chr13:48807782-48827943		chr13:48807614-48807781	chr13:48807613-48807614		488;0	155;0	869;0	724;1	947;2	524;0	700;0	589;0
K	jcn_only_AA	RBM26	chr13	-	chr13:79939854-79940189	chr13:79939869-79940189		chr13:79939854-79939868	chr13:79939853-79939854		11;0	13;0	14;0	8;0	24;2	9;0	15;0	14;0
K	intron_retention	SETDB2	chr13	+	chr13:50035299-50038156				chr13:50035298-50035299;chr13:50038156-50038157		3;0	2;0	14;0	0;0	11;3	0;0	11;0	0;0
N	alternative_donor	IRG1	chr13	+	chr13:77523720-77526623;chr13:77523722-77526623;chr13:77522706-77526623;chr13:77523726-77526623	chr13:77526454-77526623		chr13:77522706-77523719;chr13:77523720-77523721;chr13:77523722-77523725;chr13:77523726-77526453	chr13:77522705-77522706;chr13:77523719-77523720;chr13:77523721-77523722;chr13:77523725-77523726		0;0	198;21	0;0	614;41	0;0	1151;73	0;0	1091;76
K	alternative_acceptor	CHAMP1	chr13	+	chr13:115086708-115089265	chr13:115086708-115089262		chr13:115089263-115089265	chr13:115089265-115089266		0;2	2;3	3;6	0;2	0;3	0;3	0;4	0;4
K	alternative_acceptor	CKAP2	chr13	+	chr13:53030743-53035033	chr13:53030743-53035030		chr13:53035031-53035033	chr13:53035033-53035034		7;2	2;0	17;2	5;0	50;7	2;0	58;5	5;2
N	intron_retention		chr13	+	chr13:114292200-114294434				chr13:114292199-114292200;chr13:114294434-114294435		6;0	0;0	15;0	5;6	23;15	7;2	24;8	8;3
K	alternative_last_exon	ARL11	chr13	+	chr13:50202752-50204565	chr13:50202752-50204169	chr13:50204566-50208008	chr13:50204170-50204235			11;0	5;0	16;0	7;0	21;2	9;0	18;0	12;1
K	intron_retention	TNFSF13B	chr13	+	chr13:108939208-108955600				chr13:108939207-108939208;chr13:108955600-108955601		25;0	88;2	32;0	339;9	32;0	306;7	41;0	355;8
K	cassette	UPF3A	chr13	+	chr13:115048419-115051993	chr13:115048419-115051776;chr13:115051876-115051993		chr13:115051777-115051875			6;6	0;4	3;9	0;4	3;10	6;4	6;7	2;8
K	mutually_exclusive	N4BP2L1	chr13	-	chr13:32977338-32978457,chr13:32978535-32981386	chr13:32977338-32978339,chr13:32978409-32981386	chr13:32978458-32978534	chr13:32978340-32978408			14;4	44;14	5;1	43;20	6;7	40;16	8;4	30;16
K	intron_retention	TPT1	chr13	-	chr13:45914320-45915176				chr13:45914319-45914320;chr13:45915176-45915177		0;0	0;0	11;0	2;3	0;0	0;0	8;2	0;3
N	jcn_only_AD	RCBTB2	chr13	-	chr13:49064388-49070326	chr13:49064388-49066575		chr13:49066576-49070326	chr13:49070326-49070327		34;0	3;0	55;0	40;0	74;0	7;0	65;16	11;0
N	cassette	LACC1	chr13	+	chr13:44463119-44465584	chr13:44463119-44464249;chr13:44464411-44465584		chr13:44464250-44464410			5;61	3;13	22;378	9;137	11;182	8;65	0;185	5;89
K	cassette	TNFSF13B	chr13	+	chr13:108939208-108955801	chr13:108939208-108955600;chr13:108955714-108955801		chr13:108955601-108955713			0;31	0;148	0;29	0;367	0;46	3;331	0;35	0;332
K	cassette	TFDP1	chr13	+	chr13:114277602-114287434	chr13:114277602-114285937;chr13:114286060-114287434		chr13:114285938-114286059			6;24	0;10	23;38	3;22	11;79	5;20	24;90	6;33
K	alternative_last_exon	FLT1	chr13	-	chr13:28931823-28959021	chr13:28942801-28959021	chr13:28931691-28931822	chr13:28942233-28942800			4;9	1;8	0;4	0;5	0;10	1;5	2;7	0;5
K	jcn_only_AA	RBM26	chr13	-	chr13:79928697-79929354	chr13:79928706-79929354		chr13:79928697-79928705	chr13:79928696-79928697		2;7	0;8	7;0	10;11	8;11	5;0	2;15	7;16
N	jcn_only_AD	IRG1	chr13	+	chr13:77523722-77526623;chr13:77522706-77526623;chr13:77526454-77526623;chr13:77523726-77526623	chr13:77523720-77526623		chr13:77522706-77523719;chr13:77523720-77523721;chr13:77523722-77523725;chr13:77523726-77526453	chr13:77522705-77522706;chr13:77523719-77523720;chr13:77523721-77523722;chr13:77523725-77523726		0;0	200;0	0;0	613;0	0;0	1166;7	0;0	1119;0
N	alternative_donor	TDRD3	chr13	+	chr13:61109368-61141658	chr13:61121626-61141658		chr13:61109368-61121625	chr13:61109367-61109368		11;1	6;0	56;3	27;1	6;1	0;0	9;1	2;0
N	alternative_donor	TSC22D1	chr13	-	chr13:49089878-49109818	chr13:49089878-49096033		chr13:49096034-49109818	chr13:49109818-49109819		6;1	0;0	0;2	0;1	0;1	0;0	0;1	0;0
N	alternative_acceptor	PHF11	chr13	+	chr13:50092288-50095029	chr13:50092288-50094054		chr13:50094055-50095029	chr13:50095029-50095030		17;3	40;9	40;4	90;16	36;4	80;10	24;4	99;14
N	jcn_only_AA	SLC25A30	chr13	-	chr13:45970454-45973074	chr13:45971474-45973074		chr13:45970454-45971473	chr13:45970453-45970454		0;10	0;10	3;20	0;17	0;19	0;17	0;26	3;17
N	intron_retention		chr13	+	chr13:77528075-77529453				chr13:77528074-77528075;chr13:77529453-77529454		0;0	5;3	0;0	10;9	0;0	25;13	0;0	15;12
N	cassette	ATP11A	chr13	+	chr13:113530256-113536189	chr13:113530256-113532530;chr13:113532618-113536189		chr13:113532531-113532617			6;4	2;5	0;9	0;6	7;5	0;3	0;6	0;7
N	intron_retention		chr13	+	chr13:77527833-77529453				chr13:77527832-77527833;chr13:77529453-77529454		0;0	0;2	0;0	0;6	0;0	7;9	0;0	0;7
K	alternative_first_exon	PHF11	chr13	+	chr13:50070232-50080770	chr13:50071354-50080770	chr13:50070097-50070231	chr13:50071192-50071353			5;0	16;2	17;1	49;4	21;0	35;3	13;0	41;4
N	jcn_only_AD	CLN5	chr13	+	chr13:77570263-77574592	chr13:77572221-77574592		chr13:77570263-77572220	chr13:77570262-77570263		22;0	20;0	44;0	70;0	56;5	59;5	31;0	80;0
K	jcn_only_AA	ESD	chr13	-	chr13:47345632-47351590	chr13:47349828-47351590		chr13:47345632-47349827	chr13:47345631-47345632		45;2	19;0	67;0	51;0	92;0	50;0	75;0	66;0
K	intron_retention	LAMP1	chr13	+	chr13:113974786-113975718				chr13:113974785-113974786;chr13:113975718-113975719		490;2	303;0	1164;5	1052;7	1130;7	619;2	739;2	659;2
N	intron_retention	RCBTB2	chr13	-	chr13:49064388-49066575				chr13:49064387-49064388;chr13:49066575-49066576		0;5	0;0	0;4	0;0	0;9	0;0	16;0	0;0
N	intron_retention		chr13	+	chr13:77526454-77526623				chr13:77526453-77526454;chr13:77526623-77526624		0;0	0;10	0;0	0;27	0;0	0;52	0;0	2;82
N	jcn_only_AD	ZMYM2	chr13	+	chr13:20533276-20534097;chr13:20533100-20534097	chr13:20532982-20534097		chr13:20532982-20533099;chr13:20533100-20533275	chr13:20532981-20532982;chr13:20533099-20533100		0;0	2;3	0;0	9;8	2;5	0;7	0;6	3;8
N	jcn_only_AD	LACC1	chr13	+	chr13:44455434-44456320	chr13:44455684-44456320		chr13:44455434-44455683	chr13:44455433-44455434		0;51	0;7	0;378	0;108	2;161	0;44	2;185	0;84
K	intron_retention	PHF11	chr13	+	chr13:50098353-50100522				chr13:50098352-50098353;chr13:50100522-50100523		17;0	51;0	31;0	105;3	45;0	90;2	45;0	115;0
N	alternative_donor	N4BP2L2	chr13	-	chr13:33101670-33112819;chr13:33101670-33111142	chr13:33101670-33109905		chr13:33109906-33111142;chr13:33111143-33112819	chr13:33111142-33111143;chr13:33112819-33112820		0;18	0;13	0;18	3;21	0;23	0;14	0;19	0;18
K	intron_retention	EXOSC8	chr13	+	chr13:37577145-37578652				chr13:37577144-37577145;chr13:37578652-37578653		2;0	3;0	22;5	13;0	32;3	2;2	33;2	14;0
K	alternative_donor	N4BP2L2	chr13	-	chr13:33111165-33112914	chr13:33111165-33112754		chr13:33112755-33112914	chr13:33112914-33112915		0;12	1;9	0;19	0;18	0;20	2;15	2;20	0;18
K	intron_retention	CARKD	chr13	+	chr13:111287124-111287814				chr13:111287123-111287124;chr13:111287814-111287815		10;0	8;0	13;0	11;2	30;3	10;3	15;0	19;4
K	jcn_only_AA	SUPT20H	chr13	-	chr13:37591466-37593478	chr13:37591502-37593478		chr13:37591466-37591501	chr13:37591465-37591466		0;10	0;9	0;16	0;16	0;27	5;18	0;20	3;22
K	alternative_acceptor	SUPT20H	chr13	-	chr13:37591466-37593478	chr13:37591502-37593478		chr13:37591466-37591501	chr13:37591465-37591466		0;4	0;8	0;13	0;13	0;19	5;12	0;15	3;16
N	cassette	KPNA3	chr13	-	chr13:50276617-50280233	chr13:50276617-50279756;chr13:50279920-50280233		chr13:50279757-50279919			0;23	0;22	0;40	0;30	2;50	0;23	0;44	0;34
K	intron_retention	TSC22D1	chr13	-	chr13:45008151-45148547				chr13:45008150-45008151;chr13:45148547-45148548		0;11	0;6	0;3	0;23	0;9	0;29	0;13	5;21
N	jcn_only_AD	ITM2B	chr13	+	chr13:48807614-48827943	chr13:48807782-48827943		chr13:48807614-48807781	chr13:48807613-48807614		488;0	155;0	869;0	724;0	947;2	524;0	700;0	589;0
K	jcn_only_AA	ARGLU1	chr13	-	chr13:107209480-107211779	chr13:107209965-107211779					10;0	19;3	30;0	22;0	44;0	33;0	31;0	27;0
K	intron_retention	TRIM13	chr13	+	chr13:50571353-50571802				chr13:50571352-50571353;chr13:50571802-50571803		7;0	3;0	0;0	8;2	6;0	2;3	3;0	7;2
K	alternative_donor	MTIF3	chr13	-	chr13:28019294-28024200;chr13:28019294-28024278	chr13:28019294-28024645		chr13:28024201-28024278;chr13:28024279-28024645	chr13:28024278-28024279;chr13:28024645-28024646		0;6	0;5	1;8	1;6	1;16	1;5	4;11	0;9
N	alternative_acceptor	EPSTI1	chr13	-	chr13:43469245-43474445	chr13:43471681-43474445		chr13:43469245-43471680	chr13:43469244-43469245		20;0	155;3	27;1	435;13	19;1	401;7	31;0	481;7
N	alternative_acceptor	LACC1	chr13	+	chr13:44453871-44455087	chr13:44453871-44454051		chr13:44454052-44455087	chr13:44455087-44455088		14;7	0;1	24;59	11;17	41;14	10;5	38;18	22;9
N	jcn_only_AA		chr13	+	chr13:21875758-21925286	chr13:21875758-21904861					0;0	0;0	2;0	0;0	0;0	0;0	0;2	0;0
N	jcn_only_AD	EPSTI1,RCBTB2	chr13	-	chr13:43544807-43566113	chr13:43544807-43550028		chr13:43550029-43566113	chr13:43566113-43566114		15;0	120;0	18;0	367;7	33;0	281;0	26;0	376;0
K	alternative_first_exon	STARD13	chr13	-	chr13:33741760-33859606	chr13:33741760-33779955	chr13:33859607-33859892	chr13:33779956-33780143			3;2	3;1	1;0	2;0	1;0	5;2	0;1	8;4
N	alternative_donor	ZMYM2	chr13	+	chr13:20641531-20656155	chr13:20646064-20656155		chr13:20641531-20646063	chr13:20641530-20641531		22;1	13;1	25;0	24;1	10;1	27;1	16;0	39;1
N	alternative_donor	IRG1	chr13	+	chr13:77523720-77526623;chr13:77523722-77526623;chr13:77526454-77526623;chr13:77523726-77526623	chr13:77522706-77526623		chr13:77522706-77523719;chr13:77523720-77523721;chr13:77523722-77523725;chr13:77523726-77526453	chr13:77522705-77522706;chr13:77523719-77523720;chr13:77523721-77523722;chr13:77523725-77523726		0;0	34;185	0;0	65;590	0;0	119;1105	0;0	131;1036
N	coord_cassette	BORA	chr13	+	chr13:73303232-73312099	chr13:73303232-73305418;chr13:73305526-73309097;chr13:73309144-73312099		chr13:73305419-73305525;chr13:73309098-73309143			0;1	0;0	0;2	0;2	2;6	0;1	0;5	0;1
K	jcn_only_AD	MBNL2	chr13	+	chr13:98009890-98043575	chr13:98018808-98043575					2;0	2;0	2;0	2;0	11;3	2;0	0;0	3;0
N	jcn_only_AA	PHF11	chr13	+	chr13:50092288-50095029	chr13:50092288-50094054		chr13:50094055-50095029	chr13:50095029-50095030		17;0	40;0	40;0	90;2	36;0	80;0	24;0	99;0
N	alternative_acceptor	SETDB2	chr13	+	chr13:50055253-50056872	chr13:50055253-50056166		chr13:50056167-50056872	chr13:50056872-50056873		39;1	0;0	27;0	33;1	45;1	14;0	25;1	6;0
K	intron_retention	RCBTB2	chr13	-	chr13:49086014-49086151				chr13:49086013-49086014;chr13:49086151-49086152		48;0	5;0	83;2	31;0	68;0	13;0	64;2	14;0
K	intron_retention	N4BP2L1	chr13	-	chr13:32990167-32990687				chr13:32990166-32990167;chr13:32990687-32990688		0;0	0;3	0;0	0;3	0;0	0;2	0;0	3;0
N	jcn_only_AA	USP12	chr13	-	chr13:27669968-27679867	chr13:27675706-27679867		chr13:27669968-27675705	chr13:27669967-27669968		17;0	18;0	25;0	49;0	23;0	18;0	25;0	30;2
K	alternative_first_exon	RP11-307N16.6,SPATA13	chr13	+	chr13:24826001-24858272	chr13:24845051-24858272	chr13:24825856-24826000	chr13:24844825-24845050			0;8	0;12	4;4	0;10	0;5	0;18	0;5	1;19
N	alternative_donor	ZMYM2	chr13	+	chr13:20533276-20534097;chr13:20533100-20534097	chr13:20532982-20534097		chr13:20532982-20533099;chr13:20533100-20533275	chr13:20532981-20532982;chr13:20533099-20533100		0;0	1;3	0;0	3;8	2;5	2;7	0;6	2;8
K	alternative_acceptor	SUPT20H	chr13	-	chr13:37619511-37621671	chr13:37619514-37621671		chr13:37619511-37619513	chr13:37619510-37619511		2;1	7;0	11;0	6;2	11;2	7;2	15;3	8;0
K	alternative_acceptor	PCID2	chr13	-	chr13:113832291-113832487	chr13:113832323-113832487		chr13:113832291-113832322	chr13:113832290-113832291		3;2	0;0	3;4	0;3	0;8	0;2	5;7	0;4
N	jcn_only_AA	TDRD3,UFM1	chr13	+	chr13:38933471-38934847	chr13:38933471-38934177		chr13:38934178-38934847	chr13:38934847-38934848		17;0	9;0	43;2	35;0	48;6	25;0	47;6	28;0
K	intron_retention	TRIM13	chr13	+	chr13:50571268-50571802				chr13:50571267-50571268;chr13:50571802-50571803		2;0	3;0	6;3	3;2	5;0	2;0	2;2	9;2
N	alternative_donor	EPSTI1	chr13	-	chr13:43469245-43474445	chr13:43469245-43471457		chr13:43471458-43474445	chr13:43474445-43474446		20;0	155;2	27;1	435;8	19;0	401;5	31;0	481;4
N	intron_retention		chr13	-	chr13:26788907-26789610				chr13:26788906-26788907;chr13:26789610-26789611		0;13	0;8	0;24	0;27	2;30	0;25	0;20	0;32
K	alternative_acceptor	FBXL3	chr13	-	chr13:77576185-77589543	chr13:77581924-77589543		chr13:77576185-77581923	chr13:77576184-77576185		0;16	0;19	0;17	0;26	2;22	0;23	0;20	0;26
N	jcn_only_AA	STARD13	chr13	-	chr13:33692379-33700217	chr13:33692401-33700217		chr13:33692379-33692400	chr13:33692378-33692379		0;20	0;6	0;11	0;3	5;25	2;6	0;23	0;6
K	cassette	TEX30	chr13	-	chr13:103418931-103420609	chr13:103418931-103419622;chr13:103419829-103420609		chr13:103419623-103419828			0;5	0;4	0;6	0;6	7;13	0;3	0;12	0;5
K	intron_retention	ARGLU1	chr13	-	chr13:107209965-107211779				chr13:107209964-107209965;chr13:107211779-107211780		0;31	3;22	0;15	0;15	0;30	0;15	0;23	0;16
N	jcn_only_AD	FNDC3A	chr13	+	chr13:49705507-49710467	chr13:49705511-49710467		chr13:49705507-49705510	chr13:49705506-49705507		0;44	0;17	0;43	2;35	0;34	0;32	0;33	0;45
N	jcn_only_AD	EPSTI1	chr13	-	chr13:43469245-43474445	chr13:43469245-43471457		chr13:43471458-43474445	chr13:43474445-43474446		20;0	155;0	27;0	435;3	19;0	401;0	31;0	481;0
K	intron_retention	HMGB1	chr13	-	chr13:31035671-31036674				chr13:31035670-31035671;chr13:31036674-31036675		113;2	91;3	230;2	82;0	566;4	145;0	541;2	173;2
K	intron_retention	NHLRC3	chr13	+	chr13:39618319-39621176				chr13:39618318-39618319;chr13:39621176-39621177		11;0	18;0	35;0	102;9	73;5	116;8	52;2	89;3
K	jcn_only_AA	TBC1D4	chr13	-	chr13:75887035-75900332	chr13:75898538-75900332					2;0	0;0	0;0	0;0	0;2	0;0	0;0	0;0
N	alternative_donor	IRG1	chr13	+	chr13:77523720-77526623;chr13:77523722-77526623;chr13:77522706-77526623;chr13:77526454-77526623	chr13:77523726-77526623		chr13:77522706-77523719;chr13:77523720-77523721;chr13:77523722-77523725;chr13:77523726-77526453	chr13:77522705-77522706;chr13:77523719-77523720;chr13:77523721-77523722;chr13:77523725-77523726		0;0	217;2	0;0	653;2	0;0	1222;2	0;0	1161;6
K	jcn_only_AA	SUPT20H	chr13	-	chr13:37596218-37598171;chr13:37597182-37598171	chr13:37596455-37598171		chr13:37596218-37596454;chr13:37596455-37597181	chr13:37596217-37596218;chr13:37596454-37596455		13;2	9;0	14;0	26;0	24;0	15;0	31;0	26;0
K	cassette	MYCBP2	chr13	-	chr13:77673149-77695507	chr13:77673149-77692474;chr13:77692655-77695507		chr13:77692475-77692654			11;3	8;3	14;9	5;10	19;5	15;9	17;9	20;5
K	intron_retention		chr13	+	chr13:44463119-44464139				chr13:44463118-44463119;chr13:44464139-44464140		0;7	0;0	2;18	2;16	0;15	0;3	0;11	2;10
K	jcn_only_AD	LAMP1	chr13	+	chr13:113976043-113976596	chr13:113976193-113976596		chr13:113976043-113976192	chr13:113976042-113976043		585;0	305;0	1722;0	1517;6	1852;0	1067;0	1152;0	888;0
K	jcn_only_AA	TPT1	chr13	-	chr13:45911524-45912794	chr13:45911689-45912794		chr13:45911524-45911688	chr13:45911523-45911524		1993;0	1174;8	1560;0	1131;13	2651;9	1434;0	1600;6	1307;6
N	jcn_only_AD	ZMYM2	chr13	+	chr13:20533100-20534097;chr13:20532982-20534097	chr13:20533276-20534097		chr13:20532982-20533099;chr13:20533100-20533275	chr13:20532981-20532982;chr13:20533099-20533100		0;0	6;0	0;0	10;7	7;0	7;0	6;0	8;3
K	jcn_only_AA	SUPT20H	chr13	-	chr13:37619511-37621671	chr13:37619514-37621671		chr13:37619511-37619513	chr13:37619510-37619511		2;2	7;0	11;0	6;5	11;3	7;5	15;7	8;0
K	alternative_last_exon	RNASEH2B	chr13	+	chr13:51523642-51544067	chr13:51523642-51528040	chr13:51544068-51547881	chr13:51528041-51528121			2;18	1;10	2;24	1;7	4;57	1;12	4;37	1;11
N	jcn_only_AA	ZMYM5	chr13	-	chr13:20409830-20425494	chr13:20413126-20425494					0;3	0;3	0;5	0;6	0;6	0;8	2;7	0;6
K	alternative_acceptor	LACC1	chr13	+	chr13:44463119-44464249	chr13:44463119-44464139		chr13:44464140-44464249	chr13:44464249-44464250		45;5	9;2	308;19	113;9	157;9	50;4	165;7	75;6
N	cassette	ATP11A	chr13	+	chr13:113530256-113536129	chr13:113530256-113534859;chr13:113534964-113536129		chr13:113534860-113534963			2;3	2;1	8;1	2;3	13;0	15;1	17;3	7;7
N	alternative_acceptor	ERCC5	chr13	+	chr13:103498705-103504467	chr13:103498705-103501686		chr13:103501687-103504467	chr13:103504467-103504468		8;1	5;1	8;1	9;1	25;1	8;1	16;1	10;1
N	jcn_only_AA	ERCC5	chr13	+	chr13:103498705-103504467	chr13:103498705-103501686		chr13:103501687-103504467	chr13:103504467-103504468		8;0	5;0	8;0	9;0	25;0	8;0	16;0	10;2
N	jcn_only_AD	IRG1	chr13	+	chr13:77523720-77526623;chr13:77522706-77526623;chr13:77526454-77526623;chr13:77523726-77526623	chr13:77523722-77526623		chr13:77522706-77523719;chr13:77523720-77523721;chr13:77523722-77523725;chr13:77523726-77526453	chr13:77522705-77522706;chr13:77523719-77523720;chr13:77523721-77523722;chr13:77523725-77523726		0;0	185;15	0;0	590;23	0;0	1111;61	0;0	1043;76
N	cassette	LAMP1	chr13	+	chr13:113964178-113973783	chr13:113964178-113965023;chr13:113965183-113973783		chr13:113965024-113965182			0;677	0;337	0;1540	0;1278	16;1629	6;969	0;1121	11;808
K	alternative_acceptor	CCNA1	chr13	+	chr13:37006867-37007172	chr13:37006867-37007169		chr13:37007170-37007172	chr13:37007172-37007173		2;0	0;0	0;0	39;31	0;0	0;2	0;0	6;0
K	intron_retention	ESD	chr13	-	chr13:47349828-47351590				chr13:47349827-47349828;chr13:47351590-47351591		2;0	0;0	0;0	0;7	0;3	0;2	0;4	0;2
N	alternative_donor	IRG1	chr13	+	chr13:77523720-77526623;chr13:77522706-77526623;chr13:77526454-77526623;chr13:77523726-77526623	chr13:77523722-77526623		chr13:77522706-77523719;chr13:77523720-77523721;chr13:77523722-77523725;chr13:77523726-77526453	chr13:77522705-77522706;chr13:77523719-77523720;chr13:77523721-77523722;chr13:77523725-77523726		0;0	209;10	0;0	634;21	0;0	1185;39	0;0	1119;48
K	alternative_acceptor	TDRD3	chr13	+	chr13:61013907-61018820	chr13:61013907-61018816		chr13:61018817-61018820	chr13:61018820-61018821		0;2	0;3	10;18	3;9	3;4	0;1	0;4	0;2
K	intron_retention		chr13	+	chr13:77526786-77527734				chr13:77526785-77526786;chr13:77527734-77527735		0;0	168;5	5;0	456;7	0;0	1073;14	7;0	1126;17
N	intron_retention		chr13	+	chr13:77523726-77526623				chr13:77523725-77523726;chr13:77526623-77526624		0;0	0;18	0;0	0;34	0;0	0;57	0;0	5;116
K	alternative_last_exon	UGGT2	chr13	-	chr13:96636119-96638586	chr13:96637592-96638586	chr13:96636058-96636118	chr13:96637164-96637591			0;0	0;0	3;1	1;1	2;2	2;1	2;2	2;1
K	intron_retention	ARHGEF7	chr13	+	chr13:111933025-111935485				chr13:111933024-111933025;chr13:111935485-111935486		5;2	7;0	5;0	0;0	8;0	3;0	7;0	0;7
K	jcn_only_AD	MTIF3	chr13	-	chr13:28019294-28024200;chr13:28019294-28024278	chr13:28019294-28024645		chr13:28024201-28024278;chr13:28024279-28024645	chr13:28024278-28024279;chr13:28024645-28024646		0;6	0;5	9;8	3;6	6;16	6;5	8;11	0;9
K	jcn_only_AD	MED4	chr13	-	chr13:48664555-48669195	chr13:48664555-48669089		chr13:48669090-48669195	chr13:48669195-48669196		3;14	5;8	0;19	3;25	9;23	2;18	22;28	13;26
K	alternative_first_exon	ELF1	chr13	-	chr13:41556419-41587213;chr13:41556419-41634973	chr13:41556419-41593363	chr13:41634974-41635076	chr13:41593364-41593450			4;15	6;5	5;15	31;11	4;23	18;5	6;19	21;11
K	intron_retention	UPF3A	chr13	+	chr13:115048419-115051993				chr13:115048418-115048419;chr13:115051993-115051994		6;0	0;0	3;2	0;0	3;2	6;0	6;0	2;0
N	alternative_donor	LACC1	chr13	+	chr13:44455434-44456320	chr13:44455684-44456320		chr13:44455434-44455683	chr13:44455433-44455434		0;76	0;20	0;471	0;168	2;196	0;69	2;228	0;104
N	alternative_acceptor	USP12	chr13	-	chr13:27669968-27679867	chr13:27675706-27679867		chr13:27669968-27675705	chr13:27669967-27669968		17;0	18;0	25;0	49;0	23;0	18;0	25;0	30;0
K	jcn_only_AD	PDS5B	chr13	+	chr13:33338727-33344258	chr13:33338733-33344258		chr13:33338727-33338732	chr13:33338726-33338727		6;8	0;9	0;9	0;14	0;24	0;7	0;20	0;7
K	intron_retention	SLC46A3	chr13	-	chr13:29275094-29275637				chr13:29275093-29275094;chr13:29275637-29275638		2;22	0;9	3;15	0;0	2;11	0;2	6;15	0;0
K	jcn_only_AA	CKAP2	chr13	+	chr13:53030743-53035033	chr13:53030743-53035030		chr13:53035031-53035033	chr13:53035033-53035034		7;5	2;0	17;3	5;0	50;15	2;0	58;10	5;3
K	intron_retention	TPT1	chr13	-	chr13:45911524-45912794				chr13:45911523-45911524;chr13:45912794-45912795		1993;2	1174;0	1560;5	1131;7	2651;3	1434;0	1600;0	1307;7
N	cassette	SPG20	chr13	-	chr13:36909970-36920361	chr13:36909970-36910423;chr13:36910496-36920361		chr13:36910424-36910495			11;0	20;0	30;0	47;0	18;0	28;0	20;0	28;2
N	alternative_acceptor	PAN3	chr13	+	chr13:28794516-28830428	chr13:28794516-28813715		chr13:28813716-28830428	chr13:28830428-28830429		7;0	7;0	9;0	7;0	15;0	7;0	11;0	10;0
N	alternative_acceptor	VPS36	chr13	-	chr13:53001355-53007796	chr13:53003568-53007796		chr13:53001355-53003567	chr13:53001354-53001355		24;1	8;0	32;1	8;1	33;1	14;1	26;1	18;1
N	jcn_only_AA	PAN3	chr13	+	chr13:28794516-28830428	chr13:28794516-28813715		chr13:28813716-28830428	chr13:28830428-28830429		7;0	7;0	9;0	7;0	15;0	7;0	11;0	10;3
K	intron_retention	TNFSF13B	chr13	+	chr13:108955953-108959173				chr13:108955952-108955953;chr13:108959173-108959174		20;0	151;0	33;0	482;0	48;0	377;0	36;0	426;3
K	jcn_only_AD	MTIF3,TPT1	chr13	-	chr13:28014587-28019224	chr13:28014587-28015153					14;0	14;0	25;0	8;0	33;0	11;2	23;0	17;0
N	jcn_only_AD	N4BP2L2	chr13	-	chr13:33101670-33109905;chr13:33101670-33111142	chr13:33101670-33112819		chr13:33109906-33111142;chr13:33111143-33112819	chr13:33111142-33111143;chr13:33112819-33112820		20;0	10;0	26;0	22;3	33;0	15;0	28;0	23;0
K	intron_retention	EPSTI1	chr13	-	chr13:43463379-43469144				chr13:43463378-43463379;chr13:43469144-43469145		0;0	9;0	0;0	39;8	2;0	24;0	0;0	27;0
K	alternative_donor	TRIM13	chr13	+	chr13:50571268-50571802	chr13:50571353-50571802		chr13:50571268-50571352	chr13:50571267-50571268		2;3	3;3	6;4	3;7	5;4	2;3	2;4	9;4
K	intron_retention	IRG1	chr13	+	chr13:77529660-77531144				chr13:77529659-77529660;chr13:77531144-77531145		0;0	183;2	0;0	505;9	3;0	1095;11	0;0	1286;11
N	cassette	PAN3	chr13	+	chr13:28855517-28866518	chr13:28855517-28862120;chr13:28862260-28866518		chr13:28862121-28862259			0;11	0;8	2;13	0;16	0;10	0;13	0;13	0;13
K	jcn_only_AD	COMMD6	chr13	-	chr13:76100776-76104446	chr13:76100776-76104249					0;51	0;19	2;81	0;20	0;133	0;18	0;80	0;31
N	intron_retention		chr13	+	chr13:113534964-113536129				chr13:113534963-113534964;chr13:113536129-113536130		0;3	0;0	0;2	0;0	0;0	0;0	0;2	3;5
N	alternative_acceptor	RCBTB2	chr13	-	chr13:49070458-49073756	chr13:49073593-49073756		chr13:49070458-49073592	chr13:49070457-49070458		41;3	6;0	70;5	26;3	59;4	9;0	47;4	10;1
K	jcn_only_AD	MTIF3	chr13	-	chr13:28019294-28024200;chr13:28019294-28024645	chr13:28019294-28024278		chr13:28024201-28024278;chr13:28024279-28024645	chr13:28024278-28024279;chr13:28024645-28024646		6;0	5;0	11;6	6;3	16;6	7;3	16;3	9;0
K	intron_retention		chr13	+	chr13:44463119-44464249				chr13:44463118-44463119;chr13:44464249-44464250		45;7	9;0	308;22	113;15	157;13	50;3	165;12	75;9
K	jcn_only_AA	TPT1	chr13	-	chr13:45914320-45915176	chr13:45914921-45915176					0;1614	0;992	11;1989	2;1427	0;3134	0;1634	8;1813	0;1597
N	jcn_only_AD	RCBTB2	chr13	-	chr13:20409830-20425494	chr13:20409830-20411795					0;3	0;2	0;2	0;7	0;0	0;5	2;5	0;3
N	intron_retention		chr13	+	chr13:77523720-77526623				chr13:77523719-77523720;chr13:77526623-77526624		0;0	0;16	0;0	0;32	0;0	7;54	0;0	0;113
N	jcn_only_AD	LACC1	chr13	+	chr13:44456500-44457906	chr13:44457250-44457906		chr13:44456500-44457249	chr13:44456499-44456500		56;0	8;0	380;6	128;0	148;0	55;0	125;0	78;0
N	alternative_donor	CLN5	chr13	+	chr13:77570263-77574592	chr13:77572221-77574592		chr13:77570263-77572220	chr13:77570262-77570263		22;1	20;3	44;1	70;4	56;2	59;3	31;1	80;3
K	intron_retention	SETDB2	chr13	+	chr13:50035299-50041999				chr13:50035298-50035299;chr13:50041999-50042000		16;0	2;0	11;0	10;3	24;2	0;0	9;0	3;0
K	jcn_only_AA	LACC1	chr13	+	chr13:44463119-44464249	chr13:44463119-44464139		chr13:44464140-44464249	chr13:44464249-44464250		45;0	9;0	308;2	113;2	157;0	50;0	165;0	75;2
K	alternative_first_exon	ELF1,KATNAL1	chr13	-	chr13:30857929-30881467	chr13:30857929-30881076	chr13:30881468-30881621	chr13:30881077-30881163			0;1	0;0	1;0	0;0	3;3	3;1	2;3	0;1
K	alternative_donor	MTIF3	chr13	-	chr13:28019294-28024645;chr13:28019294-28024278	chr13:28019294-28024200		chr13:28024201-28024278;chr13:28024279-28024645	chr13:28024278-28024279;chr13:28024645-28024646		6;0	5;0	9;0	7;0	17;0	6;0	13;2	9;0
N	alternative_donor	TFDP1	chr13	+	chr13:114239046-114240088	chr13:114239204-114240088		chr13:114239046-114239203	chr13:114239045-114239046		0;3	0;1	2;5	0;0	6;6	0;2	6;8	0;2
K	jcn_only_AD	MYCBP2	chr13	-	chr13:77644847-77650894	chr13:77644847-77650885		chr13:77650886-77650894	chr13:77650894-77650895		9;14	0;16	0;10	11;13	14;15	14;16	14;10	9;19
N	intron_retention		chr13	-	chr13:33101670-33112819				chr13:33101669-33101670;chr13:33112819-33112820		0;6	0;5	0;7	3;11	0;10	0;6	0;6	0;3
K	jcn_only_AA	SLC11A2	chr12	-	chr12:51402328-51404477	chr12:51402408-51404477		chr12:51402328-51402407	chr12:51402327-51402328		0;9	0;9	0;20	0;48	2;25	0;19	0;13	0;41
K	intron_retention	MGST1	chr12	+	chr12:16500833-16507164				chr12:16500832-16500833;chr12:16507164-16507165		0;0	0;0	3;0	5;7	0;0	2;0	5;0	0;0
K	coord_cassette	CLEC7A	chr12	-	chr12:10278048-10280345	chr12:10278048-10279169;chr12:10279308-10279638;chr12:10279689-10280345		chr12:10279170-10279307;chr12:10279639-10279688			32;2	7;0	93;4	35;0	60;9	13;1	47;0	31;1
K	intron_retention	YBX3	chr12	-	chr12:10862714-10865809				chr12:10862713-10862714;chr12:10865809-10865810		38;0	76;3	53;0	44;0	60;0	35;0	41;0	35;2
K	coord_cassette	CLEC4A	chr12	+	chr12:8276557-8288180	chr12:8276557-8278156;chr12:8278274-8281859;chr12:8281959-8288180		chr12:8278157-8278273;chr12:8281860-8281958			0;31	0;5	5;52	0;19	2;41	0;8	0;37	0;13
K	cassette	SSH1	chr12	-	chr12:109194703-109198831	chr12:109194703-109196097;chr12:109196145-109198831		chr12:109196098-109196144			2;11	0;9	0;24	6;22	0;20	0;6	0;14	0;18
N	alternative_acceptor	SLC11A2	chr12	-	chr12:51390692-51392956	chr12:51390756-51392956		chr12:51390692-51390755	chr12:51390691-51390692		0;25	0;37	2;68	2;122	0;59	0;63	0;42	0;82
K	jcn_only_AD	NCOR2,SLC11A2	chr12	-	chr12:124870434-124882664	chr12:124870434-124873230		chr12:124873231-124882664	chr12:124882664-124882665		31;0	10;0	22;0	28;0	42;0	16;0	27;9	17;0
N	mutually_exclusive	GNS	chr12	-	chr12:65115486-65122735,chr12:65122838-65130783	chr12:65115486-65116785,chr12:65116894-65130783	chr12:65122736-65122837	chr12:65116786-65116893			0;0	0;0	0;0	9;7	0;0	0;0	0;0	9;0
N	intron_retention		chr12	-	chr12:113837033-113837360				chr12:113837032-113837033;chr12:113837360-113837361		0;0	0;0	0;2	0;0	0;2	2;0	0;0	0;0
K	cassette	HNRNPA1	chr12	+	chr12:54676659-54677595	chr12:54676659-54676862;chr12:54677019-54677595		chr12:54676863-54677018			158;9	138;9	409;18	157;10	664;33	185;9	564;32	201;10
K	cassette	ATXN2	chr12	-	chr12:111895164-111907911	chr12:111895164-111902465;chr12:111902520-111907911		chr12:111902466-111902519			0;1	0;2	0;4	7;3	10;6	0;1	0;3	8;2
K	alternative_first_exon	CD4	chr12	+	chr12:6898829-6909237	chr12:6908790-6909237	chr12:6898638-6898828	chr12:6908704-6908789			178;2	39;0	136;0	58;0	233;3	74;1	228;1	129;2
K	alternative_donor	PUS7L	chr12	-	chr12:44149065-44152088;chr12:44149065-44152503	chr12:44149065-44152532		chr12:44152089-44152503;chr12:44152504-44152532	chr12:44152503-44152504;chr12:44152532-44152533		0;0	0;0	0;2	2;0	0;5	0;0	0;3	2;3
K	cassette	VDR	chr12	-	chr12:48276558-48298737	chr12:48276558-48293619;chr12:48293742-48298737		chr12:48293620-48293741			0;0	5;0	10;6	11;3	6;1	3;1	2;2	6;3
K	intron_retention	CLEC2D	chr12	+	chr12:9822392-9833518				chr12:9822391-9822392;chr12:9833518-9833519		0;0	3;0	14;0	13;5	0;0	0;0	0;0	14;2
N	intron_retention		chr12	-	chr12:56742589-56743128				chr12:56742588-56742589;chr12:56743128-56743129		0;0	0;2	0;0	3;27	0;3	0;14	0;0	0;11
K	intron_retention	STAT2	chr12	-	chr12:56737316-56737608				chr12:56737315-56737316;chr12:56737608-56737609		28;0	95;5	48;0	269;16	45;3	305;3	42;0	245;7
N	jcn_only_AA	EPS8	chr12	-	chr12:15835907-15942094	chr12:15866260-15942094		chr12:15835907-15866259	chr12:15835906-15835907		13;2	0;0	0;0	0;0	22;0	0;0	9;0	0;0
N	intron_retention		chr12	+	chr12:113349031-113354313				chr12:113349030-113349031;chr12:113354313-113354314		0;0	0;18	0;0	0;42	0;2	6;26	0;2	5;32
K	jcn_only_AA	BICD1,PCBP2,RP11-793H13.8	chr12	+	chr12:53854928-53856276	chr12:53854928-53856264		chr12:53856265-53856276	chr12:53856276-53856277		175;130	72;68	167;157	105;120	232;206	102;91	233;205	144;99
N	cassette	LETMD1	chr12	+	chr12:51442969-51449617	chr12:51442969-51447594;chr12:51447644-51449617		chr12:51447595-51447643			0;4	0;4	0;3	0;3	0;4	0;4	2;7	0;2
K	alternative_donor	KDM2B,NCOR2	chr12	-	chr12:124810917-124812092	chr12:124810917-124811954		chr12:124811955-124812092	chr12:124812092-124812093		6;6	3;2	34;15	16;6	27;18	0;3	38;14	10;4
K	intron_retention	CD27	chr12	+	chr12:6559519-6559706				chr12:6559518-6559519;chr12:6559706-6559707		0;0	0;0	6;0	0;0	0;0	0;0	0;5	0;2
K	alternative_donor	TMEM106C	chr12	+	chr12:48359956-48360465	chr12:48360013-48360465		chr12:48359956-48360012	chr12:48359955-48359956		8;2	0;0	18;9	2;0	58;24	3;2	53;26	3;2
N	alternative_acceptor	FBRSL1,VEZT	chr12	+	chr12:133147127-133147892	chr12:133147127-133147653		chr12:133147654-133147892	chr12:133147892-133147893		0;2	0;2	6;3	0;2	3;4	0;2	7;2	0;5
K	intron_retention	ARL6IP4	chr12	+	chr12:123465293-123465675				chr12:123465292-123465293;chr12:123465675-123465676		15;2	19;5	45;11	11;2	61;8	19;3	61;9	19;3
N	cassette	DRAM1	chr12	+	chr12:102295212-102314993;chr12:102295212-102313886	chr12:102295212-102307951;chr12:102308011-102314993,chr12:102308011-102313886		chr12:102307952-102308010			0;23	24;113	36;79	73;270	6;99	77;250	0;79	90;270
K	intron_retention	NACA	chr12	-	chr12:57118308-57118745				chr12:57118307-57118308;chr12:57118745-57118746		26;2	10;0	17;6	15;0	32;2	15;0	33;5	14;0
K	alternative_acceptor	CAPRIN2	chr12	-	chr12:30863405-30864499	chr12:30863449-30864499		chr12:30863405-30863448	chr12:30863404-30863405		0;0	2;0	8;2	0;0	11;0	6;0	6;0	2;0
K	intron_retention	TMEM198B	chr12	+	chr12:56226799-56227230				chr12:56226798-56226799;chr12:56227230-56227231		0;0	0;2	0;2	0;0	3;3	0;0	0;2	0;2
N	alternative_acceptor	CYP27B1	chr12	-	chr12:58159283-58159789	chr12:58159364-58159789		chr12:58159283-58159363	chr12:58159282-58159283		2;0	58;0	2;0	228;10	0;0	209;4	0;0	295;8
K	cassette	DYRK4	chr12	+	chr12:4677215-4689989	chr12:4677215-4682495;chr12:4682523-4689989		chr12:4682496-4682522			2;1	0;0	5;1	0;0	0;1	0;0	3;4	0;0
N	alternative_donor	P2RX4	chr12	+	chr12:121661258-121666335;chr12:121660847-121666335	chr12:121660766-121666335		chr12:121660766-121660846;chr12:121660847-121661257	chr12:121660765-121660766;chr12:121660846-121660847		25;0	26;0	40;0	187;0	54;1	79;0	48;0	56;0
N	jcn_only_AD	KMT2D	chr12	-	chr12:49437782-49437982	chr12:49437782-49437973		chr12:49437974-49437982	chr12:49437982-49437983		5;0	8;2	9;0	9;5	11;0	6;0	6;0	8;0
K	intron_retention	LPCAT3	chr12	-	chr12:7087670-7087764				chr12:7087669-7087670;chr12:7087764-7087765		13;0	17;0	25;0	26;0	35;3	24;0	24;2	38;0
N	alternative_donor	FAM60A	chr12	-	chr12:31451159-31457915;chr12:31451159-31478957	chr12:31451159-31457919		chr12:31457916-31457919;chr12:31457920-31478957	chr12:31457919-31457920;chr12:31478957-31478958		0;0	7;0	5;0	16;0	5;0	10;0	6;0	9;0
N	jcn_only_AA	NCOR2	chr12	-	chr12:124979915-125051853	chr12:125020158-125051853					0;2	0;3	0;6	0;0	5;14	0;0	0;11	0;5
K	jcn_only_AD	ING4,ZNF641	chr12	-	chr12:48738496-48740931	chr12:48738496-48739127					0;6	0;0	0;13	0;0	2;13	0;5	0;9	0;9
K	cassette	KITLG	chr12	-	chr12:88900915-88910110	chr12:88900915-88909310;chr12:88909395-88910110		chr12:88909311-88909394			0;1	0;0	17;7	6;16	15;17	0;4	10;9	6;4
N	alternative_donor	ADIPOR2	chr12	+	chr12:1800358-1863423	chr12:1800380-1863423		chr12:1800358-1800379	chr12:1800357-1800358		2;0	9;0	5;0	0;0	8;0	6;0	9;0	14;5
N	alternative_donor	CD4	chr12	+	chr12:6923445-6923924;chr12:6923630-6923924	chr12:6923467-6923924		chr12:6923445-6923466;chr12:6923467-6923629	chr12:6923444-6923445;chr12:6923466-6923467		5;143	1;22	6;120	0;56	8;251	1;77	8;221	2;124
K	jcn_only_AD	GOLGA3,ZNF384	chr12	-	chr12:6797393-6798533	chr12:6797393-6798263		chr12:6798264-6798533	chr12:6798533-6798534		2;7	2;2	9;5	8;3	5;6	6;6	2;11	7;0
K	cassette	PTGES3	chr12	-	chr12:57060051-57065532	chr12:57060051-57064058;chr12:57064149-57065532		chr12:57064059-57064148			0;99	0;78	0;201	0;127	0;279	0;124	0;298	3;153
K	jcn_only_AA	ZDHHC17	chr12	+	chr12:77209800-77216185	chr12:77209800-77214837					5;0	6;0	10;0	11;0	6;2	9;0	11;0	13;5
K	intron_retention	ATP2A2	chr12	+	chr12:110784127-110788096				chr12:110784126-110784127;chr12:110788096-110788097		0;44	0;49	0;110	3;90	0;112	0;97	2;128	0;128
K	intron_retention	HNRNPA1	chr12	+	chr12:54675287-54675578				chr12:54675286-54675287;chr12:54675578-54675579		259;0	244;0	536;6	233;0	824;2	251;0	878;2	339;2
K	intron_retention	PRPF40B	chr12	+	chr12:50037536-50037643				chr12:50037535-50037536;chr12:50037643-50037644		0;5	0;13	3;10	0;9	0;5	3;6	0;8	0;11
K	cassette	MGST1	chr12	+	chr12:16507313-16516728	chr12:16507313-16510538;chr12:16510634-16516728		chr12:16510539-16510633			2;38	0;115	3;127	17;775	3;93	7;227	2;80	9;359
K	intron_retention	ZDHHC17	chr12	+	chr12:77236762-77239488				chr12:77236761-77236762;chr12:77239488-77239489		6;0	0;0	13;3	18;4	9;2	3;2	10;0	18;2
N	alternative_donor	TAOK3	chr12	-	chr12:118627747-118636855	chr12:118627747-118636828		chr12:118636829-118636855	chr12:118636855-118636856		26;0	15;1	28;0	26;1	41;2	25;1	55;0	45;0
N	alternative_acceptor	TRPV4	chr12	-	chr12:110226522-110230167	chr12:110226548-110230167		chr12:110226522-110226547	chr12:110226521-110226522		2;0	0;0	25;1	0;0	24;0	2;0	14;0	2;0
K	intron_retention	EIF2B1	chr12	-	chr12:124109410-124110971				chr12:124109409-124109410;chr12:124110971-124110972		22;3	14;0	33;0	14;0	47;5	17;0	38;0	23;2
K	intron_retention	LETMD1	chr12	+	chr12:51442969-51445874				chr12:51442968-51442969;chr12:51445874-51445875		5;0	5;0	8;5	6;0	11;0	0;0	9;2	3;0
N	jcn_only_AA	SLC41A2	chr12	-	chr12:105199116-105238249	chr12:105227960-105238249		chr12:105199116-105227959	chr12:105199115-105199116		5;0	27;0	8;0	75;6	11;0	58;2	6;0	61;5
K	jcn_only_AD	STAT6	chr12	-	chr12:57502083-57503825;chr12:57502083-57503859	chr12:57502083-57503723		chr12:57503724-57503825;chr12:57503826-57503859	chr12:57503825-57503826;chr12:57503859-57503860		0;6	0;0	5;5	9;6	5;0	0;0	0;0	7;3
K	alternative_acceptor	MMP19	chr12	-	chr12:56234598-56234889	chr12:56234667-56234889		chr12:56234598-56234666	chr12:56234597-56234598		0;38	0;15	0;35	8;234	0;32	0;67	0;67	0;130
K	jcn_only_AD	ACTR6	chr12	+	chr12:100599523-100601440	chr12:100599536-100601440		chr12:100599523-100599535	chr12:100599522-100599523		0;0	9;0	10;0	5;0	13;2	15;2	13;0	11;0
K	intron_retention	DRAM1	chr12	+	chr12:102313980-102314993				chr12:102313979-102313980;chr12:102314993-102314994		33;0	214;0	205;0	610;4	170;0	443;3	139;0	531;0
N	alternative_donor	ZDHHC17	chr12	+	chr12:77191318-77199096	chr12:77198855-77199096		chr12:77191318-77198854	chr12:77191317-77191318		8;0	6;0	9;0	17;0	10;0	14;0	9;0	20;0
K	alternative_acceptor	IFFO1	chr12	-	chr12:6657992-6658641	chr12:6658016-6658641		chr12:6657992-6658015	chr12:6657991-6657992		3;5	3;0	11;9	14;0	16;9	8;4	18;6	6;0
K	intron_retention	SH2B3	chr12	+	chr12:111885632-111885786				chr12:111885631-111885632;chr12:111885786-111885787		89;7	14;0	85;0	76;0	109;5	52;2	139;9	65;2
K	intron_retention	LTA4H	chr12	-	chr12:96402927-96406965				chr12:96402926-96402927;chr12:96406965-96406966		105;2	13;0	89;2	14;0	91;2	13;0	99;0	14;0
K	jcn_only_AD	NAA25,RPL6	chr12	-	chr12:112486248-112491361	chr12:112486248-112487286					8;0	2;0	0;0	0;0	6;0	0;0	10;0	5;2
K	alternative_donor	ARL6IP4	chr12	+	chr12:123465814-123466117	chr12:123465847-123466117		chr12:123465814-123465846	chr12:123465813-123465814		0;8	0;10	0;22	0;6	14;34	0;11	0;26	0;12
K	jcn_only_AD	RP11-705C15.2	chr12	+	chr12:9809246-9809516	chr12:9809294-9809516		chr12:9809246-9809293	chr12:9809245-9809246		0;0	0;0	6;2	10;8	7;5	0;2	5;3	3;5
N	alternative_donor	NDUFA9,RP11-500M8.7	chr12	+	chr12:4764089-4766913	chr12:4765682-4766913		chr12:4764089-4765681	chr12:4764088-4764089		40;1	47;3	68;1	107;5	82;2	93;3	101;1	111;2
K	alternative_acceptor	EIF4B	chr12	+	chr12:53413811-53415589	chr12:53413811-53415499		chr12:53415500-53415589	chr12:53415589-53415590		138;1	41;0	115;1	41;0	99;0	32;0	113;0	49;0
K	intron_retention	TXNRD1	chr12	+	chr12:104680888-104682708				chr12:104680887-104680888;chr12:104682708-104682709		17;4	15;5	77;7	72;11	39;5	23;6	49;4	42;3
K	alternative_acceptor	OSBPL8	chr12	-	chr12:76844760-76853638	chr12:76844769-76853638		chr12:76844760-76844768	chr12:76844759-76844760		0;0	0;2	2;0	0;4	0;3	0;2	0;3	0;1
N	jcn_only_AA	STX2	chr12	-	chr12:131289089-131291526;chr12:131286034-131291526	chr12:131289086-131291526		chr12:131286034-131289085;chr12:131289086-131289088	chr12:131286033-131286034;chr12:131289085-131289086		8;0	9;0	10;0	7;0	24;3	3;0	22;0	8;0
K	intron_retention		chr12	-	chr12:7635601-7635962				chr12:7635600-7635601;chr12:7635962-7635963		538;7	906;7	1048;0	515;0	1506;3	1815;4	1055;0	2392;7
N	alternative_donor	FAM60A,NAA25	chr12	-	chr12:31451159-31478957;chr12:31451159-31457919	chr12:31451159-31457915		chr12:31457916-31457919;chr12:31457920-31478957	chr12:31457919-31457920;chr12:31478957-31478958		0;0	7;0	5;0	15;1	5;0	10;0	6;0	8;1
K	alternative_acceptor	LRP1,PRR13	chr12	+	chr12:53836518-53837324	chr12:53836518-53837174		chr12:53837175-53837324	chr12:53837324-53837325		0;97	3;112	7;178	5;280	11;214	2;228	7;192	19;290
K	intron_retention	DYNLL1	chr12	+	chr12:120934357-120935875				chr12:120934356-120934357;chr12:120935875-120935876		159;0	141;3	230;0	273;5	252;2	182;2	238;0	239;0
K	intron_retention	CLEC4E	chr12	-	chr12:8689863-8691812				chr12:8689862-8689863;chr12:8691812-8691813		2;0	47;5	11;0	313;20	5;0	192;11	2;0	330;20
K	jcn_only_AA	TFCP2	chr12	-	chr12:51489059-51489771	chr12:51489062-51489771		chr12:51489059-51489061	chr12:51489058-51489059		0;11	3;6	2;9	2;8	6;32	0;10	3;20	0;18
K	alternative_acceptor	DDX11	chr12	+	chr12:31226904-31231396	chr12:31226904-31231323		chr12:31231324-31231396	chr12:31231396-31231397		0;0	0;0	0;0	0;0	0;1	0;1	0;0	2;0
K	alternative_acceptor	CHD4	chr12	-	chr12:6709523-6709699	chr12:6709562-6709699		chr12:6709523-6709561	chr12:6709522-6709523		10;13	0;13	25;25	14;18	31;29	0;21	16;29	15;31
N	jcn_only_AD	TRAFD1	chr12	+	chr12:112579007-112579892	chr12:112579029-112579892		chr12:112579007-112579028	chr12:112579006-112579007		0;19	0;41	0;32	0;106	0;35	2;93	0;25	0;119
K	alternative_first_exon	TPCN1	chr12	+	chr12:113659432-113664532	chr12:113663142-113664532	chr12:113659243-113659431	chr12:113663049-113663141			4;14	0;3	15;15	0;0	9;23	1;1	11;15	1;6
K	cassette	COPS7A	chr12	+	chr12:6833985-6837388	chr12:6833985-6837091;chr12:6837168-6837388		chr12:6837092-6837167			0;23	0;20	0;38	0;28	0;69	0;21	6;68	0;28
K	alternative_first_exon	CD63	chr12	-	chr12:56121124-56121395;chr12:56121124-56122059	chr12:56121124-56121647	chr12:56121396-56121599;chr12:56122060-56122266	chr12:56121648-56121684			431;2	280;0	674;0	574;0	843;0	509;0	745;0	652;0
K	intron_retention	CD163L1	chr12	-	chr12:7527353-7527426				chr12:7527352-7527353;chr12:7527426-7527427		95;6	0;0	193;9	5;0	110;9	2;0	86;6	2;2
K	cassette	ERC1	chr12	+	chr12:1219514-1225031	chr12:1219514-1221380;chr12:1221465-1225031		chr12:1221381-1221464			0;7	0;5	3;6	2;12	2;15	0;8	2;11	2;11
K	jcn_only_AD	ESPL1	chr12	+	chr12:53662162-53662538	chr12:53662191-53662538		chr12:53662162-53662190	chr12:53662161-53662162		0;0	0;0	0;0	0;0	10;3	0;0	6;0	0;0
K	intron_retention	DNAJC14,RP11-762I7.5	chr12	-	chr12:56216260-56216355				chr12:56216259-56216260;chr12:56216355-56216356		6;0	17;0	20;0	22;0	24;2	7;2	17;2	34;2
N	jcn_only_AD		chr12	-	chr12:7640684-7649408	chr12:7640684-7647676					0;775	2;1120	0;1317	0;660	0;1966	0;2461	2;1336	0;2986
K	jcn_only_AD	CIT	chr12	-	chr12:120148426-120149982	chr12:120148426-120148853		chr12:120148854-120149982	chr12:120149982-120149983		0;0	0;0	0;0	0;0	2;11	0;0	0;8	0;0
K	intron_retention	YBX3	chr12	-	chr12:10856748-10865809				chr12:10856747-10856748;chr12:10865809-10865810		32;0	42;2	20;0	27;0	25;0	15;0	25;0	15;2
N	alternative_acceptor	STAT2	chr12	-	chr12:56742814-56742946	chr12:56742844-56742946		chr12:56742814-56742843	chr12:56742813-56742814		0;31	0;77	0;29	7;185	0;39	0;188	0;30	0;209
K	jcn_only_AD	ERC1	chr12	+	chr12:1100489-1136913	chr12:1100654-1136913		chr12:1100489-1100653	chr12:1100488-1100489		0;0	0;5	0;2	3;5	6;0	8;2	7;2	6;0
K	alternative_last_exon	RHNO1	chr12	+	chr12:2994701-2997076	chr12:2994701-2996143	chr12:2997077-2998689	chr12:2996144-2996277			13;0	9;0	26;0	9;0	63;0	8;0	43;2	11;0
K	alternative_donor	SCYL2	chr12	+	chr12:100661175-100676720	chr12:100661571-100676720		chr12:100661175-100661570	chr12:100661174-100661175		7;5	5;4	6;22	0;20	0;15	11;14	6;18	7;20
N	intron_retention	2019-03-09	chr12	+	chr12:58150868-58151073				chr12:58150867-58150868;chr12:58151073-58151074		0;0	0;2	0;0	5;4	0;0	0;3	0;0	0;4
K	alternative_first_exon	BCAT1	chr12	-	chr12:25054820-25055880;chr12:25054820-25101860	chr12:25054820-25054896	chr12:25055881-25056009;chr12:25101861-25102393	chr12:25054897-25055230			5;11	4;2	23;18	22;6	35;25	21;6	19;32	16;8
K	jcn_only_AA	CS,RP11-977G19.10	chr12	-	chr12:56680405-56693943;chr12:56680430-56693943	chr12:56692476-56693943					40;0	33;0	82;0	50;0	100;0	36;2	122;0	47;0
N	alternative_donor		chr12	-	chr12:8689863-8691737;chr12:8689863-8690226	chr12:8689863-8691812		chr12:8690227-8691737;chr12:8691738-8691812	chr12:8691737-8691738;chr12:8691812-8691813		0;2	5;47	0;11	14;313	0;5	18;192	0;2	20;330
N	jcn_only_AA	SLC11A2	chr12	-	chr12:51390692-51392956	chr12:51390756-51392956		chr12:51390692-51390755	chr12:51390691-51390692		0;36	0;59	2;95	2;164	0;73	0;88	0;66	0;113
K	jcn_only_AD	CSRNP2	chr12	-	chr12:51470431-51477121	chr12:51470431-51477011		chr12:51477012-51477121	chr12:51477121-51477122		2;0	6;0	0;0	3;2	2;0	10;2	6;0	10;0
K	jcn_only_AD	GTF2H3	chr12	+	chr12:124144023-124144341	chr12:124144132-124144341					0;8	0;14	0;18	3;31	0;14	0;17	0;28	0;19
K	jcn_only_AD	CCDC59,ING4	chr12	-	chr12:82751049-82752457	chr12:82751049-82752001		chr12:82752002-82752457	chr12:82752457-82752458		0;0	0;2	5;7	0;5	0;6	0;6	8;2	0;0
N	jcn_only_AA	RBMS2,TBC1D30	chr12	+	chr12:56965640-56974967	chr12:56965640-56966573		chr12:56966574-56974967	chr12:56974967-56974968		6;0	2;0	9;0	64;0	5;0	45;0	5;0	39;3
K	jcn_only_AA	RPLP0	chr12	-	chr12:120636435-120636656	chr12:120636543-120636656		chr12:120636435-120636542	chr12:120636434-120636435		0;609	0;241	10;1007	0;190	0;1618	0;211	0;1283	0;194
K	cassette	RNF41	chr12	-	chr12:56604353-56607741	chr12:56604353-56606779;chr12:56606923-56607741		chr12:56606780-56606922			7;2	3;1	6;2	8;3	10;1	2;1	3;4	20;2
K	jcn_only_AA	RSRC2	chr12	-	chr12:122992995-122995655	chr12:122992998-122995655		chr12:122992995-122992997	chr12:122992994-122992995		10;8	9;14	13;18	11;24	10;9	13;13	19;15	17;22
K	alternative_donor	RAD52	chr12	-	chr12:1036430-1038984	chr12:1036430-1038929		chr12:1038930-1038984	chr12:1038984-1038985		2;0	0;0	0;0	5;1	2;0	2;0	3;0	0;0
K	jcn_only_AD	PAN2	chr12	-	chr12:56717698-56717832	chr12:56717698-56717820		chr12:56717821-56717832	chr12:56717832-56717833		6;3	2;0	6;0	0;0	7;0	0;0	6;0	3;0
K	jcn_only_AD	PUS7L	chr12	-	chr12:44149065-44152088;chr12:44149065-44152503	chr12:44149065-44152532		chr12:44152089-44152503;chr12:44152504-44152532	chr12:44152503-44152504;chr12:44152532-44152533		2;0	0;0	0;2	3;0	2;5	0;0	0;3	2;3
K	jcn_only_AD	USP15	chr12	+	chr12:62696702-62708570	chr12:62699840-62708570		chr12:62696702-62699839	chr12:62696701-62696702		27;7	51;13	31;3	115;20	47;2	111;14	32;0	134;15
K	intron_retention	DUSP6	chr12	-	chr12:89744803-89745416				chr12:89744802-89744803;chr12:89745416-89745417		30;0	11;0	60;2	72;0	94;2	92;5	111;2	131;0
K	intron_retention	ZNF384	chr12	-	chr12:6787877-6788111				chr12:6787876-6787877;chr12:6788111-6788112		5;0	6;2	15;3	17;2	23;2	11;0	22;2	16;0
K	intron_retention	P2RX7	chr12	+	chr12:121615016-121615099				chr12:121615015-121615016;chr12:121615099-121615100		13;0	15;0	14;2	52;7	15;2	5;0	19;0	8;2
K	alternative_last_exon	MYL6	chr12	+	chr12:56554105-56554409;chr12:56554105-56556047	chr12:56554105-56555170	chr12:56554410-56554729;chr12:56556048-56556115	chr12:56555171-56555371			20;386	17;337	38;847	64;814	43;1289	42;807	44;1097	62;988
K	cassette	APAF1	chr12	+	chr12:99093348-99100262	chr12:99093348-99097148;chr12:99097278-99100262		chr12:99097149-99097277			0;8	0;4	0;6	0;5	6;12	3;5	3;12	5;9
K	intron_retention	STAT2	chr12	-	chr12:56742408-56742535				chr12:56742407-56742408;chr12:56742535-56742536		58;0	128;0	52;0	365;11	57;0	378;9	57;0	423;9
K	intron_retention	CD163	chr12	-	chr12:7639583-7639954				chr12:7639582-7639583;chr12:7639954-7639955		653;8	1068;7	1084;2	607;0	1785;2	2153;2	1243;0	2751;9
K	cassette	WNK1	chr12	+	chr12:971437-980430	chr12:971437-977031;chr12:978271-980430		chr12:977032-978270			23;1	34;0	48;1	31;1	34;2	18;0	40;2	49;2
K	cassette	TRPV4	chr12	-	chr12:110232293-110236418	chr12:110232293-110234329;chr12:110234510-110236418		chr12:110234330-110234509			2;3	0;0	0;26	0;1	0;29	0;2	0;15	0;3
K	alternative_acceptor	CTDSP2	chr12	-	chr12:58217789-58218009	chr12:58217873-58218009		chr12:58217789-58217872	chr12:58217788-58217789		0;43	0;51	0;33	0;35	0;38	0;42	0;32	3;67
K	intron_retention	CLEC7A	chr12	-	chr12:10278048-10280345				chr12:10278047-10278048;chr12:10280345-10280346		32;11	7;0	93;12	35;3	60;16	13;2	47;7	31;2
K	intron_retention	USP15	chr12	+	chr12:62696702-62698453				chr12:62696701-62696702;chr12:62698453-62698454		0;2	0;0	0;0	0;2	0;0	0;3	0;2	2;6
N	coord_cassette	DRAM1	chr12	+	chr12:102295212-102313886	chr12:102295212-102301963;chr12:102302142-102307951;chr12:102308011-102313886		chr12:102301964-102302141;chr12:102307952-102308010			0;37	24;190	36;163	66;499	0;175	69;437	0;131	81;500
K	cassette	P2RX7	chr12	+	chr12:121570899-121593881	chr12:121570899-121592587;chr12:121592757-121593881		chr12:121592588-121592756			2;20	0;24	0;22	0;83	0;29	0;17	0;25	3;20
K	alternative_first_exon	ANKLE2,CLIP1	chr12	-	chr12:122865106-122901873;chr12:122865106-122907067	chr12:122865106-122884678	chr12:122907068-122907179	chr12:122884679-122884790			2;1	6;0	9;0	14;1	9;1	8;0	12;1	11;1
K	mutually_exclusive	DIABLO	chr12	-	chr12:122702945-122709191,chr12:122709296-122710511	chr12:122702945-122709058,chr12:122709192-122710511	chr12:122709192-122709295	chr12:122709059-122709191			1;15	3;11	3;16	6;26	5;28	2;15	3;23	7;24
N	intron_retention		chr12	-	chr12:7647804-7647908				chr12:7647803-7647804;chr12:7647908-7647909		0;599	6;942	2;961	0;461	0;1580	0;1820	0;985	0;2112
N	jcn_only_AA	BIN2	chr12	-	chr12:51686126-51689579	chr12:51686129-51689579		chr12:51686126-51686128	chr12:51686125-51686126		0;47	0;23	0;68	0;78	0;69	0;52	2;66	0;75
K	mutually_exclusive	CAPRIN2	chr12	-	chr12:30869611-30873744,chr12:30873850-30876192	chr12:30869611-30872012,chr12:30872160-30876192	chr12:30873745-30873849	chr12:30872013-30872159			0;1	0;0	1;4	1;1	0;1	2;2	0;1	2;1
K	jcn_only_AD	CHFR	chr12	-	chr12:133438221-133446204;chr12:133438221-133448870	chr12:133438221-133438918					3;0	9;0	18;0	22;0	20;3	17;0	25;0	34;0
K	intron_retention	KCTD10	chr12	-	chr12:109895884-109898440				chr12:109895883-109895884;chr12:109898440-109898441		8;2	6;0	20;0	11;0	13;2	17;0	14;0	8;0
K	intron_retention	OS9	chr12	+	chr12:58111742-58111928				chr12:58111741-58111742;chr12:58111928-58111929		152;0	165;0	274;0	266;5	332;0	313;2	266;0	313;0
K	cassette	PPP1R12A	chr12	-	chr12:80192365-80199945	chr12:80192365-80199371;chr12:80199549-80199945		chr12:80199372-80199548			0;11	0;8	2;14	7;22	0;20	0;15	0;18	14;24
N	alternative_donor	ANKLE2,RASAL1	chr12	-	chr12:133331720-133338203	chr12:133331720-133333219		chr12:133333220-133338203	chr12:133338203-133338204		0;0	5;0	8;1	33;1	14;0	13;0	11;1	18;0
K	intron_retention	TMPO-AS1	chr12	-	chr12:98909676-98909768				chr12:98909675-98909676;chr12:98909768-98909769		2;11	0;2	0;21	0;3	2;60	0;15	5;60	0;7
K	jcn_only_AD	CORO1C,PXN	chr12	-	chr12:109095100-109125204	chr12:109095100-109123920		chr12:109123921-109125204	chr12:109125204-109125205		26;0	18;0	109;0	57;3	91;0	31;0	113;0	52;0
K	cassette	PARP11	chr12	-	chr12:3935400-3939055	chr12:3935400-3938075;chr12:3938197-3939055		chr12:3938076-3938196			0;2	0;6	0;5	0;10	0;5	7;9	0;4	9;12
K	intron_retention	DDIT3	chr12	-	chr12:57911222-57911488				chr12:57911221-57911222;chr12:57911488-57911489		16;0	7;2	17;2	35;5	13;5	9;2	16;5	16;0
K	cassette	RBMS2	chr12	+	chr12:56956368-56963682	chr12:56956368-56962758;chr12:56962818-56963682		chr12:56962759-56962817			0;5	0;6	0;8	2;64	0;11	0;42	0;7	0;37
K	alternative_donor	GAPDH	chr12	+	chr12:6643736-6643975	chr12:6643828-6643975		chr12:6643736-6643827	chr12:6643735-6643736		890;0	1708;2	1288;0	833;0	3250;3	2228;2	2023;3	2551;2
K	cassette	KDM5A	chr12	-	chr12:394829-401924	chr12:394829-395291;chr12:395374-401924		chr12:395292-395373			9;4	23;1	17;3	32;3	22;4	20;4	23;3	23;4
N	intron_retention		chr12	+	chr12:4718715-4719320				chr12:4718714-4718715;chr12:4719320-4719321		0;0	0;0	0;2	0;0	0;2	0;0	0;0	6;2
K	intron_retention	LETMD1	chr12	+	chr12:51442969-51447560				chr12:51442968-51442969;chr12:51447560-51447561		2;0	0;0	0;3	0;0	2;2	0;0	6;3	2;0
K	alternative_first_exon	C12orf49,HVCN1	chr12	-	chr12:111126514-111126884;chr12:111126514-111127116	chr12:111126514-111127530	chr12:111126885-111126962;chr12:111127117-111127222	chr12:111127531-111127583			3;0	1;0	11;0	0;0	10;2	4;2	9;0	7;0
K	cassette	SMARCD1	chr12	+	chr12:50480662-50482303	chr12:50480662-50481145;chr12:50481269-50482303		chr12:50481146-50481268			0;9	0;11	0;17	0;26	0;23	5;14	0;16	6;24
K	alternative_acceptor	TFCP2	chr12	-	chr12:51489059-51489771	chr12:51489062-51489771		chr12:51489059-51489061	chr12:51489058-51489059		0;6	3;3	2;4	2;4	6;16	0;5	3;10	0;9
K	intron_retention	SLC11A2	chr12	-	chr12:51389571-51390599				chr12:51389570-51389571;chr12:51390599-51390600		50;0	63;0	120;4	151;8	91;4	92;2	88;0	127;0
N	jcn_only_AA		chr12	+	chr12:65264589-65268852	chr12:65264589-65268780		chr12:65268781-65268852	chr12:65268852-65268853		0;0	2;0	0;0	0;0	0;2	0;3	0;0	0;5
K	alternative_last_exon	TXNRD1	chr12	+	chr12:104733052-104742130	chr12:104733052-104739796	chr12:104742131-104744061	chr12:104739797-104739933			137;1	65;1	243;4	284;5	162;2	92;1	193;1	122;2
K	jcn_only_AD	GOLGA3,LINC00937	chr12	-	chr12:8509738-8542865	chr12:8509738-8522808					0;0	0;0	0;0	0;0	0;0	0;0	0;0	2;5
K	jcn_only_AA	VPS29	chr12	-	chr12:110934009-110939853	chr12:110937352-110939853					16;15	19;6	66;31	86;44	142;33	94;22	117;49	122;40
K	alternative_last_exon	RBM19	chr12	-	chr12:114255992-114261013	chr12:114260452-114261013	chr12:114254547-114255991	chr12:114259859-114260451			2;7	1;5	4;11	3;13	4;12	1;5	3;14	1;10
K	intron_retention	NAP1L1	chr12	-	chr12:76441499-76442172				chr12:76441498-76441499;chr12:76442172-76442173		55;15	24;14	63;32	32;24	56;28	28;14	69;31	33;13
K	coord_cassette	WNK1	chr12	+	chr12:971437-987380	chr12:971437-977031;chr12:978271-980430;chr12:980515-987380		chr12:977032-978270;chr12:980431-980514			8;2	0;0	0;1	6;1	13;2	0;0	0;2	0;2
K	intron_retention	DGKA	chr12	+	chr12:56333955-56334097				chr12:56333954-56333955;chr12:56334097-56334098		7;0	0;0	13;5	7;0	3;2	0;0	5;0	14;0
K	alternative_acceptor	SART3	chr12	-	chr12:108938255-108938914	chr12:108938309-108938914		chr12:108938255-108938308	chr12:108938254-108938255		10;0	6;0	22;1	19;1	30;3	14;4	20;4	20;2
K	alternative_first_exon	METTL21B	chr12	+	chr12:58166181-58166799	chr12:58166685-58166799	chr12:58165983-58166180	chr12:58166383-58166684			1;2	3;6	1;2	7;17	2;6	2;12	2;5	4;24
N	alternative_donor	KIAA1033	chr12	+	chr12:105516017-105519781	chr12:105516025-105519781		chr12:105516017-105516024	chr12:105516016-105516017		35;0	45;1	53;0	76;0	58;0	84;0	69;0	107;0
K	jcn_only_AA	M6PR	chr12	-	chr12:9099002-9102083;chr12:9099421-9102083	chr12:9098984-9102083					116;11	75;0	488;0	385;0	491;0	292;2	482;0	318;0
K	alternative_acceptor	RECQL	chr12	-	chr12:21654150-21654414	chr12:21654307-21654414		chr12:21654150-21654306	chr12:21654149-21654150		0;9	0;4	0;20	0;19	2;28	0;16	0;26	2;16
K	intron_retention	DYRK4	chr12	+	chr12:4714253-4716492				chr12:4714252-4714253;chr12:4716492-4716493		10;0	0;0	10;9	11;0	14;2	5;0	11;2	6;0
N	cassette	CIT	chr12	-	chr12:120222870-120260623	chr12:120222870-120241009;chr12:120241194-120260623		chr12:120241010-120241193			0;1	0;0	0;2	0;0	0;13	0;0	3;10	0;1
K	intron_retention	PRPF40B	chr12	+	chr12:50031608-50035711				chr12:50031607-50031608;chr12:50035711-50035712		0;5	2;6	0;7	0;6	0;5	0;3	0;3	0;6
K	intron_retention	SLC48A1	chr12	+	chr12:48174073-48176000				chr12:48174072-48174073;chr12:48176000-48176001		0;26	0;6	0;76	0;13	0;28	0;5	2;40	0;8
N	cassette	RILPL2	chr12	-	chr12:123907705-123920628	chr12:123907705-123915054;chr12:123915207-123920628		chr12:123915055-123915206			3;38	0;99	0;71	16;169	5;57	0;148	0;51	20;206
K	intron_retention	SMUG1	chr12	-	chr12:54575432-54576287				chr12:54575431-54575432;chr12:54576287-54576288		0;0	5;0	10;2	10;6	16;9	14;2	19;9	17;7
K	jcn_only_AD	TXNRD1	chr12	+	chr12:104680888-104682708;chr12:104681125-104682708	chr12:104681210-104682708		chr12:104680888-104681124;chr12:104681125-104681209	chr12:104680887-104680888;chr12:104681124-104681125		32;0	24;0	118;0	122;0	56;0	33;0	69;2	58;0
K	alternative_first_exon	HVCN1	chr12	-	chr12:111126514-111126884;chr12:111126514-111127530	chr12:111126514-111127116	chr12:111126885-111126962;chr12:111127531-111127583	chr12:111127117-111127222			2;1	0;1	7;4	0;0	9;3	6;0	7;2	7;0
K	cassette	P2RX4	chr12	+	chr12:121648102-121659715	chr12:121648102-121654936;chr12:121655085-121659715		chr12:121654937-121655084			2;38	0;47	0;82	11;385	8;110	5;155	2;84	6;124
K	intron_retention	CD63	chr12	-	chr12:56122137-56123065				chr12:56122136-56122137;chr12:56123065-56123066		0;8	3;3	6;10	3;5	9;8	5;7	6;14	14;7
N	alternative_donor	STAT2	chr12	-	chr12:56745235-56748249;chr12:56745235-56748242	chr12:56745235-56748202		chr12:56748203-56748242;chr12:56748243-56748249	chr12:56748242-56748243;chr12:56748249-56748250		30;0	49;0	46;2	217;10	37;2	193;2	33;0	226;4
N	jcn_only_AD	CLIP1,NCKAP5L	chr12	-	chr12:50185835-50186228	chr12:50185835-50186149		chr12:50186150-50186228	chr12:50186228-50186229		5;0	0;0	19;0	8;5	17;0	2;0	22;2	14;0
K	jcn_only_AA	CS,RP11-977G19.10	chr12	-	chr12:56692476-56693943;chr12:56680405-56693943	chr12:56680430-56693943					0;40	0;33	0;82	0;50	0;100	2;36	0;122	2;44
K	intron_retention	NOP2	chr12	-	chr12:6675491-6675694				chr12:6675490-6675491;chr12:6675694-6675695		0;0	2;0	2;0	6;0	6;2	0;0	2;2	0;0
N	alternative_acceptor	ARL6IP4	chr12	+	chr12:57569489-57569757	chr12:57569489-57569691		chr12:57569692-57569757	chr12:57569757-57569758		0;275	0;41	0;207	0;29	0;408	0;89	3;341	0;84
K	jcn_only_AA	PTPN6	chr12	+	chr12:7069599-7069968	chr12:7069599-7069825		chr12:7069826-7069968	chr12:7069968-7069969		102;0	35;0	139;0	63;0	198;0	55;0	205;2	89;0
K	cassette	P2RX7	chr12	+	chr12:121603991-121613190	chr12:121603991-121605290;chr12:121605428-121613190		chr12:121605291-121605427			0;23	0;20	2;23	0;87	0;21	0;13	0;28	0;17
K	cassette	MMP19	chr12	-	chr12:56232519-56234450	chr12:56232519-56233279;chr12:56233526-56234450		chr12:56233280-56233525			3;68	0;40	0;69	10;413	0;71	0;107	6;120	2;216
K	alternative_first_exon	MRPL42	chr12	+	chr12:93863132-93870729	chr12:93864282-93870729	chr12:93862965-93863131	chr12:93864262-93864281			8;1	9;1	19;0	16;0	17;1	12;0	21;0	20;0
K	intron_retention	DGKA	chr12	+	chr12:56333314-56333865				chr12:56333313-56333314;chr12:56333865-56333866		2;0	2;0	8;3	7;0	5;0	5;0	5;0	8;0
K	intron_retention	RAD51AP1	chr12	+	chr12:4665717-4668022				chr12:4665716-4665717;chr12:4668022-4668023		0;0	0;0	0;0	0;0	0;0	0;0	3;5	0;0
K	intron_retention	MARS	chr12	+	chr12:57905887-57906018				chr12:57905886-57905887;chr12:57906018-57906019		22;0	15;0	57;0	27;2	56;4	38;0	42;2	65;2
K	jcn_only_AD	UBE3B	chr12	+	chr12:109915570-109919441	chr12:109915915-109919441		chr12:109915570-109915914	chr12:109915569-109915570		0;8	2;3	3;6	2;8	6;7	2;7	2;10	5;2
K	alternative_first_exon	SSH1	chr12	-	chr12:109217138-109246413	chr12:109217138-109221038	chr12:109246414-109246454	chr12:109221039-109221327			5;1	5;0	9;5	9;1	9;4	5;1	9;4	12;1
K	jcn_only_AA	ARL6IP4	chr12	+	chr12:123465847-123466141	chr12:123465847-123466117		chr12:123466118-123466141	chr12:123466141-123466142		20;8	15;2	26;10	11;0	55;20	18;10	56;13	14;7
K	alternative_acceptor	DYRK4	chr12	+	chr12:4721885-4722680	chr12:4721885-4722677		chr12:4722678-4722680	chr12:4722680-4722681		2;10	0;7	0;8	0;8	0;16	0;8	0;10	0;7
N	alternative_acceptor	TMPO	chr12	+	chr12:113405980-113407444	chr12:113405980-113407412		chr12:113407413-113407444	chr12:113407444-113407445		0;9	0;129	0;16	2;374	0;25	0;378	0;24	2;458
K	alternative_first_exon	HVCN1	chr12	-	chr12:111099254-111126429	chr12:111099254-111121029	chr12:111126430-111126513	chr12:111121030-111121072			1;31	1;5	1;37	1;6	1;31	1;14	3;26	1;12
K	intron_retention	DAZAP2	chr12	+	chr12:51634246-51634750				chr12:51634245-51634246;chr12:51634750-51634751		0;50	5;30	0;114	0;75	0;124	0;68	7;119	0;94
K	alternative_first_exon	HVCN1	chr12	-	chr12:111126514-111127530;chr12:111126514-111127116	chr12:111126514-111126884	chr12:111127531-111127583;chr12:111127117-111127222	chr12:111126885-111126962			1;2	1;0	4;7	0;0	5;7	2;4	2;7	0;7
K	jcn_only_AA	LIMA1	chr12	-	chr12:50586345-50589612	chr12:50586348-50589612		chr12:50586345-50586347	chr12:50586344-50586345		16;3	2;0	10;2	0;0	25;3	0;0	47;7	8;0
N	intron_retention		chr12	-	chr12:9096132-9098013				chr12:9096131-9096132;chr12:9098013-9098014		0;0	0;0	0;4	0;0	3;2	0;2	0;2	0;0
N	jcn_only_AD	CHPT1	chr12	+	chr12:102120183-102122678	chr12:102120276-102122678		chr12:102120183-102120275	chr12:102120182-102120183		14;2	2;0	23;2	11;0	44;0	9;0	53;6	19;0
K	alternative_first_exon	PYM1	chr12	-	chr12:56297265-56320859;chr12:56297265-56321508	chr12:56297265-56308059	chr12:56320860-56321051;chr12:56321509-56321697	chr12:56308060-56308150			9;2	9;1	19;2	16;3	20;3	16;2	24;2	23;1
K	alternative_donor	USP5	chr12	+	chr12:6972473-6972993	chr12:6972542-6972993		chr12:6972473-6972541	chr12:6972472-6972473		8;1	16;0	38;2	9;0	32;3	13;1	31;3	17;0
K	intron_retention	STAT2	chr12	-	chr12:56744217-56744612				chr12:56744216-56744217;chr12:56744612-56744613		14;0	72;0	39;0	269;2	45;0	234;0	39;0	242;2
K	alternative_last_exon	ZNF268	chr12	+	chr12:133768590-133778729	chr12:133768590-133770013	chr12:133778730-133791417	chr12:133770014-133770123			1;4	1;4	1;4	0;2	1;6	1;3	1;6	1;3
K	jcn_only_AA	DDIT3	chr12	-	chr12:57911208-57911488	chr12:57911222-57911488		chr12:57911208-57911221	chr12:57911207-57911208		0;16	0;7	2;17	8;35	3;13	0;9	2;16	2;16
K	intron_retention	STAT2	chr12	-	chr12:56743421-56743880				chr12:56743420-56743421;chr12:56743880-56743881		27;3	123;11	47;5	298;32	60;0	363;22	55;2	393;20
K	jcn_only_AA	SLC25A3	chr12	+	chr12:98987914-98989504	chr12:98987914-98989210					106;0	57;0	209;0	98;2	267;0	95;0	305;0	113;0
N	cassette	R3HDM2	chr12	-	chr12:57690335-57691872	chr12:57690335-57691110;chr12:57691171-57691872		chr12:57691111-57691170			0;10	2;9	0;9	0;8	0;5	0;8	0;12	0;9
N	alternative_donor	SH2B3	chr12	+	chr12:111858293-111884556;chr12:111882663-111884556	chr12:111856682-111884556		chr12:111856682-111858292;chr12:111858293-111882662	chr12:111856681-111856682;chr12:111858292-111858293		2;36	0;6	2;30	2;33	4;51	1;24	3;68	1;25
K	alternative_donor	NACA	chr12	-	chr12:57118308-57119046	chr12:57118308-57118745		chr12:57118746-57119046	chr12:57119046-57119047		350;21	163;10	395;28	143;13	439;29	144;10	419;33	200;17
N	intron_retention		chr12	-	chr12:49521851-49666830				chr12:49521850-49521851;chr12:49666830-49666831		0;105	0;77	0;426	0;322	0;911	0;250	2;881	0;307
K	intron_retention	CHFR	chr12	-	chr12:133446385-133447309				chr12:133446384-133446385;chr12:133447309-133447310		5;2	8;2	10;0	22;3	14;0	14;3	18;0	23;2
N	mutually_exclusive	RILPL2	chr12	-	chr12:123900469-123915054,chr12:123915207-123920628	chr12:123900469-123907590,chr12:123907705-123920628	chr12:123915055-123915206	chr12:123907591-123907704			1;4	1;1	1;1	1;15	1;6	1;1	1;1	4;23
K	jcn_only_AA	M6PR	chr12	-	chr12:9098984-9102083;chr12:9099002-9102083	chr12:9099421-9102083					127;0	75;0	485;2	385;0	491;0	294;0	482;0	318;0
K	alternative_first_exon	SLC11A2	chr12	-	chr12:51404550-51420097,chr12:51404550-51420092;chr12:51404550-51421959	chr12:51404550-51419557	chr12:51420098-51420121;chr12:51421960-51422194	chr12:51419558-51419924			2;0	6;0	11;0	30;1	4;0	22;1	5;1	24;1
K	intron_retention	STAT6	chr12	-	chr12:57502083-57503859				chr12:57502082-57502083;chr12:57503859-57503860		0;3	0;0	0;5	0;10	5;4	0;7	0;6	2;6
N	alternative_donor	TRAFD1	chr12	+	chr12:112579007-112579892	chr12:112579029-112579892		chr12:112579007-112579028	chr12:112579006-112579007		0;9	0;20	0;14	0;58	0;19	2;46	0;13	0;58
K	coord_cassette	CLEC2D	chr12	+	chr12:9840683-9847355	chr12:9840683-9845423;chr12:9845528-9845629;chr12:9845712-9847355		chr12:9845424-9845527;chr12:9845630-9845711			0;6	0;5	0;11	0;14	0;2	2;1	0;4	0;12
K	intron_retention	CDK17	chr12	-	chr12:96674058-96674585				chr12:96674057-96674058;chr12:96674585-96674586		6;0	6;0	6;5	11;6	3;2	9;0	8;3	15;2
K	coord_cassette	GTF2H3	chr12	+	chr12:124137283-124144062	chr12:124137283-124139470;chr12:124139546-124140317;chr12:124140372-124144062		chr12:124139471-124139545;chr12:124140318-124140371			0;7	0;8	2;12	0;10	0;21	0;8	0;18	0;9
K	intron_retention	C12orf4	chr12	-	chr12:4614547-4626226				chr12:4614546-4614547;chr12:4626226-4626227		6;0	2;0	44;2	44;2	39;0	19;0	48;0	27;0
K	alternative_first_exon	SMUG1	chr12	-	chr12:54577744-54581602;chr12:54577744-54582734	chr12:54577744-54582298	chr12:54581603-54581689;chr12:54582735-54582778	chr12:54582299-54582406			2;1	4;3	4;1	9;3	9;4	2;3	11;2	3;1
K	intron_retention	RSRC2	chr12	-	chr12:123005129-123005931				chr12:123005128-123005129;chr12:123005931-123005932		0;0	6;0	5;5	6;3	8;0	7;2	7;2	0;2
K	alternative_last_exon	TMPO	chr12	+	chr12:98925617-98931252	chr12:98925617-98926600	chr12:98931253-98931491	chr12:98926601-98929412			10;8	5;4	13;10	3;3	47;31	7;6	50;34	6;6
K	jcn_only_AD	YBX3	chr12	-	chr12:10854734-10856658	chr12:10854734-10856649		chr12:10856650-10856658	chr12:10856658-10856659		0;60	8;91	0;61	0;45	0;55	6;57	0;60	0;69
K	jcn_only_AA	ASIC1,PCBP2	chr12	+	chr12:53861628-53862563	chr12:53861628-53862560		chr12:53862561-53862563	chr12:53862563-53862564		38;118	23;52	44;130	20;78	60;188	11;74	47;203	28;102
K	jcn_only_AA	CNPY2,RP11-977G19.10	chr12	-	chr12:56705199-56708634	chr12:56706670-56708634		chr12:56705199-56706669	chr12:56705198-56705199		10;0	8;0	36;0	18;0	64;2	25;0	63;0	30;0
K	coord_cassette	DYRK4	chr12	+	chr12:4677215-4698102	chr12:4677215-4682495;chr12:4682523-4689989;chr12:4690144-4698102		chr12:4682496-4682522;chr12:4689990-4690143			0;1	0;0	0;2	0;1	0;2	0;0	3;3	0;1
K	intron_retention	C2CD5	chr12	-	chr12:22625742-22627684				chr12:22625741-22625742;chr12:22627684-22627685		20;2	2;0	17;0	15;0	32;2	8;0	32;0	9;0
K	cassette	ZNF140	chr12	+	chr12:133657659-133659688	chr12:133657659-133657858;chr12:133657916-133659688		chr12:133657859-133657915			0;2	3;3	0;3	0;3	0;3	0;5	0;1	0;5
K	cassette	PPHLN1	chr12	+	chr12:42720032-42729684	chr12:42720032-42726461;chr12:42726505-42729684		chr12:42726462-42726504			6;6	5;2	36;6	19;5	20;9	20;6	26;11	18;4
N	intron_retention		chr12	-	chr12:7655436-7656240				chr12:7655435-7655436;chr12:7656240-7656241		0;0	0;2	0;0	0;0	0;0	0;3	0;0	5;3
K	alternative_first_exon	EMP1	chr12	+	chr12:13349807-13366412	chr12:13364523-13366412	chr12:13349650-13349806	chr12:13364403-13364522			3;108	0;27	1;128	1;440	0;166	1;188	4;228	1;188
K	cassette	FMNL3	chr12	-	chr12:50039687-50040668	chr12:50039687-50040421;chr12:50040537-50040668		chr12:50040422-50040536			15;0	25;1	31;0	64;2	22;1	31;2	22;0	60;2
K	jcn_only_AA	IFFO1	chr12	-	chr12:6657324-6657590	chr12:6657327-6657590		chr12:6657324-6657326	chr12:6657323-6657324		8;22	2;7	9;39	2;14	14;27	3;10	8;33	5;15
N	jcn_only_AD	RBMS2	chr12	+	chr12:56956368-56962758	chr12:56961971-56962758		chr12:56956368-56961970	chr12:56956367-56956368		8;0	8;0	6;0	76;0	17;0	63;5	8;0	38;0
K	alternative_first_exon	PDE1B	chr12	+	chr12:54943770-54960757	chr12:54955422-54960757	chr12:54943644-54943769	chr12:54955241-54955421			1;1	1;3	0;3	0;7	1;1	0;4	3;3	2;12
N	jcn_only_AD	MLEC	chr12	+	chr12:121125335-121131893	chr12:121125512-121131893		chr12:121125335-121125511	chr12:121125334-121125335		22;0	16;0	82;7	14;0	103;0	25;0	103;0	31;0
N	jcn_only_AD	ATXN2,CD163	chr12	-	chr12:111908547-111923074	chr12:111908547-111916873		chr12:111916874-111923074	chr12:111923074-111923075		5;0	2;0	11;0	0;0	9;0	3;0	3;0	14;2
N	jcn_only_AD	FMNL3,PRKAG1	chr12	-	chr12:50062338-50100837	chr12:50062338-50099467		chr12:50099468-50100837	chr12:50100837-50100838		9;0	31;0	28;0	41;0	11;0	23;5	19;0	35;0
K	alternative_acceptor	LRMP,PCBP2	chr12	+	chr12:25215835-25216656	chr12:25215835-25216653		chr12:25216654-25216656	chr12:25216656-25216657		0;3	0;0	0;2	0;0	6;6	0;0	0;4	0;0
N	jcn_only_AD	SH2B3	chr12	+	chr12:111858293-111884556;chr12:111882663-111884556	chr12:111856682-111884556		chr12:111856682-111858292;chr12:111858293-111882662	chr12:111856681-111856682;chr12:111858292-111858293		0;36	0;6	0;30	3;33	10;51	0;24	6;68	0;25
K	alternative_acceptor	CHFR	chr12	-	chr12:133446385-133447309	chr12:133446421-133447309		chr12:133446385-133446420	chr12:133446384-133446385		5;3	8;1	10;0	22;3	14;0	14;3	18;1	23;3
N	jcn_only_AD	TAOK3	chr12	-	chr12:118627747-118636855	chr12:118627747-118636828		chr12:118636829-118636855	chr12:118636855-118636856		26;0	15;0	28;0	26;0	41;6	25;0	55;0	45;0
K	jcn_only_AD	RHNO1	chr12	+	chr12:2994659-2997076	chr12:2994701-2997076		chr12:2994659-2994700	chr12:2994658-2994659		2;14	0;10	0;30	0;6	0;65	5;14	5;39	0;9
K	alternative_acceptor	RP11-745O10.4,TMBIM4	chr12	-	chr12:66547229-66563634	chr12:66554953-66563634		chr12:66547229-66554952	chr12:66547228-66547229		72;1	68;1	122;1	125;1	170;1	93;1	153;1	150;1
N	intron_retention		chr12	+	chr12:4765682-4766913				chr12:4765681-4765682;chr12:4766913-4766914		0;0	0;0	0;0	0;7	0;0	2;0	0;0	0;2
N	alternative_donor	ITGB7,TAOK3	chr12	-	chr12:118704565-118810452;chr12:118704565-118796727	chr12:118704565-118796723		chr12:118796724-118796727;chr12:118796728-118810452	chr12:118796727-118796728;chr12:118810452-118810453		16;0	15;0	11;0	35;0	15;0	19;0	19;0	28;0
N	intron_retention		chr12	-	chr12:88776352-88778862				chr12:88776351-88776352;chr12:88778862-88778863		0;0	0;0	0;0	14;6	0;0	6;0	0;0	0;0
K	alternative_last_exon	C12orf49	chr12	-	chr12:117155699-117175594	chr12:117161029-117175594	chr12:117147990-117155698	chr12:117160872-117161028			1;23	0;13	2;40	0;41	1;49	0;25	1;33	0;36
N	coord_cassette	DRAM1	chr12	+	chr12:102295212-102314993	chr12:102295212-102301963;chr12:102302142-102307951;chr12:102308011-102314993		chr12:102301964-102302141;chr12:102307952-102308010			0;21	0;105	0;104	7;309	6;104	8;273	0;82	9;320
N	jcn_only_AD	CAMKK2,PARP11	chr12	-	chr12:121707385-121708700	chr12:121707385-121708330		chr12:121708331-121708700	chr12:121708700-121708701		13;0	7;0	13;0	14;0	16;0	13;0	17;2	19;0
N	alternative_acceptor	SCARB1	chr12	-	chr12:125294812-125296415	chr12:125294836-125296415		chr12:125294812-125294835	chr12:125294811-125294812		0;34	0;10	0;47	0;5	2;38	0;6	0;47	0;6
K	jcn_only_AA	CD163	chr12	-	chr12:7632510-7633756	chr12:7632593-7633756		chr12:7632510-7632592	chr12:7632509-7632510		398;120	535;292	589;285	276;183	872;364	889;540	575;230	1228;788
K	alternative_first_exon	CD63	chr12	-	chr12:56121124-56122059;chr12:56121124-56121647	chr12:56121124-56121395	chr12:56122060-56122266;chr12:56121648-56121684	chr12:56121396-56121599			431;2	279;1	674;0	573;1	841;2	509;0	744;1	650;2
N	jcn_only_AD	ATP2B1,BIN2	chr12	-	chr12:51678572-51681891	chr12:51678572-51681667		chr12:51681668-51681891	chr12:51681891-51681892		45;0	26;0	93;0	58;0	61;0	58;5	68;0	66;0
K	jcn_only_AD	FBXW8	chr12	+	chr12:117348963-117365827	chr12:117349161-117365827		chr12:117348963-117349160	chr12:117348962-117348963		0;0	0;3	0;2	0;0	0;0	0;0	3;7	0;3
K	jcn_only_AA	MPHOSPH9	chr12	-	chr12:123707675-123712009	chr12:123710899-123712009					0;0	0;0	3;0	0;0	0;0	0;0	0;2	0;0
K	jcn_only_AA	TBC1D15	chr12	+	chr12:72300919-72307605	chr12:72300919-72301642					19;2	6;0	11;0	10;0	38;0	16;0	24;0	10;0
K	intron_retention	CALCOCO1	chr12	-	chr12:54105906-54106883				chr12:54105905-54105906;chr12:54106883-54106884		16;6	5;3	10;5	11;0	14;5	10;0	11;0	18;0
K	alternative_acceptor	VEZT	chr12	+	chr12:95660409-95663826	chr12:95660409-95663814		chr12:95663815-95663826	chr12:95663826-95663827		0;2	11;3	2;5	19;14	17;5	10;6	20;5	7;5
K	intron_retention	PRR13,RP11-793H13.8	chr12	+	chr12:53835577-53836478				chr12:53835576-53835577;chr12:53836478-53836479		68;0	64;0	109;0	161;2	122;0	136;0	138;0	206;5
K	alternative_donor	ARHGDIB,ITGB7	chr12	-	chr12:53594231-53594901	chr12:53594231-53594855		chr12:53594856-53594901	chr12:53594901-53594902		0;0	0;0	0;36	3;17	0;19	0;6	0;11	0;13
K	intron_retention	TPCN1	chr12	+	chr12:113726040-113726562				chr12:113726039-113726040;chr12:113726562-113726563		52;7	10;0	47;2	0;0	69;6	8;0	74;6	14;2
N	cassette	APPL2	chr12	-	chr12:105569861-105571003	chr12:105569861-105570653;chr12:105570795-105571003		chr12:105570654-105570794			0;35	0;2	0;28	0;5	0;49	0;4	6;44	0;7
K	intron_retention	MAP3K12	chr12	-	chr12:53880940-53881038				chr12:53880939-53880940;chr12:53881038-53881039		3;2	0;0	0;0	0;0	0;2	0;3	0;0	2;2
N	intron_retention	SLC11A2	chr12	-	chr12:51375587-51382082				chr12:51375586-51375587;chr12:51382082-51382083		0;9	0;7	0;22	0;40	0;18	0;17	0;15	3;24
K	intron_retention	OASL	chr12	-	chr12:121461941-121469244				chr12:121461940-121461941;chr12:121469244-121469245		0;0	3;0	5;0	113;4	0;0	83;5	0;0	86;5
N	jcn_only_AD	RP11-705C15.2	chr12	+	chr12:9800586-9806278	chr12:9801530-9806278		chr12:9800586-9801529	chr12:9800585-9800586		0;6	0;0	0;17	0;17	0;7	0;5	0;18	3;11
K	intron_retention	GNS	chr12	-	chr12:65122838-65130783				chr12:65122837-65122838;chr12:65130783-65130784		295;2	540;0	351;0	1092;8	538;0	1247;0	550;0	1283;3
K	intron_retention	STAT6	chr12	-	chr12:57492862-57493076				chr12:57492861-57492862;chr12:57493076-57493077		44;5	49;5	74;5	165;4	72;6	101;3	82;2	131;6
K	intron_retention	ANKLE2	chr12	-	chr12:133311162-133311991				chr12:133311161-133311162;chr12:133311991-133311992		14;0	33;5	30;3	60;11	34;6	45;6	30;5	51;11
N	alternative_donor	FMNL3,PRKAG1	chr12	-	chr12:50062338-50100837	chr12:50062338-50099467		chr12:50099468-50100837	chr12:50100837-50100838		9;0	31;1	28;1	41;2	11;1	23;1	19;1	35;1
K	cassette	COPZ1	chr12	+	chr12:54736072-54739243	chr12:54736072-54737008;chr12:54737101-54739243		chr12:54737009-54737100			0;62	0;32	0;95	0;36	2;115	0;34	0;123	2;45
K	cassette	TNFRSF1A	chr12	-	chr12:6439878-6442234	chr12:6439878-6440018;chr12:6440093-6442234		chr12:6440019-6440092			0;74	0;72	5;101	0;121	0;152	0;134	0;130	0;164
K	intron_retention	DYRK4	chr12	+	chr12:4716554-4719320				chr12:4716553-4716554;chr12:4719320-4719321		15;0	0;0	11;0	7;0	13;3	5;0	14;0	3;0
N	intron_retention		chr12	-	chr12:7623989-7632455				chr12:7623988-7623989;chr12:7632455-7632456		0;0	0;2	0;0	6;2	0;2	0;7	0;0	17;7
K	cassette	TXNRD1	chr12	+	chr12:104681125-104705067;chr12:104680888-104705067	chr12:104681125-104682708,chr12:104680888-104682708;chr12:104682819-104705067		chr12:104682709-104682818			3;70	0;32	18;168	17;185	10;76	2;46	13;117	9;85
K	cassette	ATXN2	chr12	-	chr12:111951344-111956052	chr12:111951344-111953957;chr12:111954168-111956052		chr12:111953958-111954167			0;8	0;7	0;12	3;11	7;15	3;10	5;12	0;11
N	intron_retention		chr12	+	chr12:111858293-111884556				chr12:111858292-111858293;chr12:111884556-111884557		0;2	0;0	0;2	0;0	10;2	0;0	6;2	0;0
K	jcn_only_AD	CHFR	chr12	-	chr12:133438221-133448870;chr12:133438221-133438918	chr12:133438221-133446204					0;3	0;9	5;14	0;22	3;20	2;15	5;20	2;32
K	alternative_acceptor	RASAL1	chr12	-	chr12:113542020-113543518	chr12:113542104-113543518		chr12:113542020-113542103	chr12:113542019-113542020		0;0	0;0	2;6	0;0	0;1	0;0	0;4	0;0
K	jcn_only_AA	NCOR2	chr12	-	chr12:124841329-124846671	chr12:124841353-124846671		chr12:124841329-124841352	chr12:124841328-124841329		0;10	2;0	9;24	3;13	6;22	0;6	8;24	2;6
K	intron_retention	LYZ	chr12	+	chr12:69742325-69743887				chr12:69742324-69742325;chr12:69743887-69743888		8242;5	3510;2	2114;2	1852;0	1760;0	1172;0	1543;0	1744;0
K	cassette	LETMD1	chr12	+	chr12:51442969-51450132;chr12:51442969-51447560	chr12:51442969-51445874;chr12:51445991-51450132,chr12:51445991-51447560		chr12:51445875-51445990			2;7	7;4	2;6	2;5	2;11	0;2	14;7	2;4
K	cassette	DIABLO,RP11-512M8.5	chr12	-	chr12:122701417-122709058	chr12:122701417-122702812;chr12:122702945-122709058		chr12:122702813-122702944			0;17	0;16	2;26	0;32	2;29	2;19	0;30	0;32
K	cassette	PRH1-PRR4,TAS2R14	chr12	-	chr12:11126321-11199618	chr12:11126321-11187380;chr12:11187485-11199618		chr12:11187381-11187484			0;0	0;1	0;1	0;0	0;2	2;0	5;1	0;2
K	intron_retention	CD63	chr12	-	chr12:56120046-56120483				chr12:56120045-56120046;chr12:56120483-56120484		1441;0	1088;2	2419;0	2225;0	3639;3	2189;2	3189;0	2715;2
K	intron_retention		chr12	+	chr12:54912517-54912697				chr12:54912516-54912517;chr12:54912697-54912698		128;4	72;0	197;3	93;2	273;6	88;3	216;4	157;5
K	cassette	NECAP1	chr12	+	chr12:8242896-8245271	chr12:8242896-8244364;chr12:8244447-8245271		chr12:8244365-8244446			0;13	0;10	0;13	0;42	0;13	0;25	2;17	0;23
K	intron_retention	MYL6,MYL6B	chr12	+	chr12:56552496-56553370				chr12:56552495-56552496;chr12:56553370-56553371		631;2	478;2	1486;3	1518;6	2332;6	1490;6	2099;6	1658;3
K	intron_retention	TBK1	chr12	+	chr12:64891820-64895109				chr12:64891819-64891820;chr12:64895109-64895110		11;0	40;0	26;0	83;0	23;0	48;2	19;0	75;3
N	jcn_only_AA	GNS	chr12	-	chr12:65110594-65113801	chr12:65110600-65113801		chr12:65110594-65110599	chr12:65110593-65110594		0;311	0;553	2;400	13;1169	10;486	0;1098	0;522	0;1541
K	alternative_first_exon	PYM1	chr12	-	chr12:56297265-56308059;chr12:56297265-56321508	chr12:56297265-56320859	chr12:56308060-56308150;chr12:56321509-56321697	chr12:56320860-56321051			11;0	9;1	20;1	15;4	22;1	17;1	21;5	23;1
K	intron_retention	DRAM1	chr12	+	chr12:102295212-102307951				chr12:102295211-102295212;chr12:102307951-102307952		0;0	0;6	0;2	10;10	0;0	10;4	0;0	0;6
K	alternative_first_exon	BCAT1,RNF41	chr12	-	chr12:25054820-25055880;chr12:25054820-25054896	chr12:25054820-25101860	chr12:25055881-25056009;chr12:25054897-25055230	chr12:25101861-25102393			15;1	4;2	40;1	21;7	53;7	18;9	48;3	20;4
K	alternative_donor	EIF4B	chr12	+	chr12:53428494-53431192	chr12:53428509-53431192		chr12:53428494-53428508	chr12:53428493-53428494		178;2	55;0	130;0	49;0	175;4	44;0	130;5	77;0
K	alternative_first_exon	RIMKLB	chr12	+	chr12:8850894-8866406	chr12:8853211-8866406	chr12:8850496-8850893	chr12:8852381-8853210			1;0	1;0	3;0	8;1	5;0	3;0	2;0	3;0
K	cassette	POC1B	chr12	-	chr12:89885893-89918896	chr12:89885893-89890947;chr12:89891120-89918896		chr12:89890948-89891119			2;2	0;3	3;6	0;7	7;4	2;4	6;5	2;7
K	jcn_only_AA	CHFR	chr12	-	chr12:133428321-133430016	chr12:133428324-133430016		chr12:133428321-133428323	chr12:133428320-133428321		5;0	6;8	14;15	9;11	18;7	13;11	18;18	23;10
K	alternative_last_exon	DAZAP2	chr12	+	chr12:51634901-51639844	chr12:51634901-51636113	chr12:51639845-51640501	chr12:51636114-51637717			4;264	5;194	8;406	4;313	8;513	5;304	8;466	8;393
K	intron_retention	PPP1R12A	chr12	-	chr12:80199549-80201005				chr12:80199548-80199549;chr12:80201005-80201006		8;0	6;0	14;0	10;0	15;0	7;0	11;0	9;4
K	alternative_first_exon	AEBP2	chr12	+	chr12:19593305-19615443	chr12:19593662-19615443	chr12:19592608-19593304	chr12:19593515-19593661			5;0	3;0	7;0	6;1	7;1	6;0	9;0	9;0
K	jcn_only_AD	IGF1	chr12	-	chr12:102796345-102813286	chr12:102796345-102811732					50;2	0;0	11;0	11;0	25;2	7;0	42;2	10;0
K	intron_retention	SH2B3	chr12	+	chr12:111884838-111884928				chr12:111884837-111884838;chr12:111884928-111884929		61;0	15;0	44;0	36;2	102;2	33;0	110;5	48;0
K	alternative_first_exon	NCOR2,VPS29	chr12	-	chr12:110934009-110936624;chr12:110934009-110937339	chr12:110934009-110939853	chr12:110936625-110936664;chr12:110937340-110937351	chr12:110939854-110939922			7;9	5;12	25;39	29;50	24;83	19;54	32;68	29;71
K	cassette	TMBIM6	chr12	+	chr12:50135899-50146246	chr12:50135899-50138195;chr12:50138326-50146246		chr12:50138196-50138325			0;0	0;0	14;1	0;0	0;1	9;1	0;2	14;0
K	jcn_only_AA	ING4	chr12	-	chr12:6761934-6762101	chr12:6761937-6762101		chr12:6761934-6761936	chr12:6761933-6761934		5;10	6;10	6;2	3;0	8;8	6;3	8;7	11;6
N	jcn_only_AD	TBC1D15	chr12	+	chr12:72315235-72316762	chr12:72315251-72316762		chr12:72315235-72315250	chr12:72315234-72315235		23;0	5;0	17;0	9;0	35;0	17;0	30;0	32;2
K	intron_retention	SCAF11	chr12	-	chr12:46316366-46316718				chr12:46316365-46316366;chr12:46316718-46316719		35;3	25;0	66;2	41;0	80;0	49;2	61;2	49;2
K	alternative_donor	ARL6IP4	chr12	+	chr12:123465814-123466141	chr12:123465847-123466141		chr12:123465814-123465846	chr12:123465813-123465814		16;14	13;15	36;29	15;11	64;48	13;15	63;44	15;15
K	alternative_donor	NOP2,RNF41	chr12	-	chr12:56610398-56615686	chr12:56610398-56615543		chr12:56615544-56615686	chr12:56615686-56615687		3;7	0;5	5;5	0;5	0;6	5;4	0;7	2;7
K	cassette	PCBP2,RP11-793H13.8	chr12	+	chr12:53858637-53861004;chr12:53856352-53861004	chr12:53858637-53859715,chr12:53856352-53859715;chr12:53859758-53861004		chr12:53859716-53859757			16;261	8;118	40;259	0;165	0;355	6;130	26;306	20;198
K	cassette	TXNRD1	chr12	+	chr12:104682819-104707022	chr12:104682819-104705067;chr12:104705191-104707022		chr12:104705068-104705190			0;93	0;42	0;195	2;224	0;117	0;63	0;152	0;100
K	intron_retention	SLC25A3	chr12	+	chr12:98989627-98991633				chr12:98989626-98989627;chr12:98991633-98991634		151;0	75;0	268;0	119;4	330;2	118;0	334;0	144;0
N	intron_retention		chr12	-	chr12:7586151-7586228				chr12:7586150-7586151;chr12:7586228-7586229		0;85	0;2	0;152	0;6	10;128	0;2	5;89	0;2
K	alternative_acceptor	RSRC2	chr12	-	chr12:122992995-122995655	chr12:122992998-122995655		chr12:122992995-122992997	chr12:122992994-122992995		10;4	9;7	13;9	11;12	10;4	13;6	19;7	17;11
K	intron_retention	LETMD1	chr12	+	chr12:51442155-51442816				chr12:51442154-51442155;chr12:51442816-51442817		2;4	0;2	2;0	0;0	2;2	0;3	0;5	0;3
K	cassette	PLBD2	chr12	+	chr12:113822071-113823016	chr12:113822071-113822655;chr12:113822752-113823016		chr12:113822656-113822751			0;59	0;45	0;177	0;130	0;178	0;101	2;153	0;136
K	alternative_acceptor	SBNO1	chr12	-	chr12:123830115-123832575	chr12:123830118-123832575		chr12:123830115-123830117	chr12:123830114-123830115		7;3	5;0	7;3	9;4	9;2	3;3	8;4	5;2
N	jcn_only_AD	CLEC4E	chr12	-	chr12:8689863-8690226;chr12:8689863-8691812	chr12:8689863-8691737		chr12:8690227-8691737;chr12:8691738-8691812	chr12:8691737-8691738;chr12:8691812-8691813		2;0	47;0	11;0	315;0	5;0	192;18	2;0	330;0
K	cassette	CACNA2D4	chr12	-	chr12:1919507-1920827	chr12:1919507-1919708;chr12:1919754-1920827		chr12:1919709-1919753			0;4	0;1	3;15	0;5	0;12	0;7	0;24	2;8
N	jcn_only_AD	OAS1	chr12	+	chr12:113349064-113354313;chr12:113349041-113354313	chr12:113349031-113354313		chr12:113349031-113349040;chr12:113349041-113349063	chr12:113349030-113349031;chr12:113349040-113349041		36;0	217;0	48;0	938;0	48;0	635;6	47;0	836;5
K	alternative_first_exon	MGST1	chr12	+	chr12:16500833-16507164;chr12:16500119-16507164	chr12:16506402-16507164	chr12:16500712-16500832;chr12:16500076-16500118	chr12:16506351-16506401			1;0	2;3	5;0	10;0	3;0	4;0	2;0	4;0
K	intron_retention	IRAK3	chr12	+	chr12:66622151-66638265				chr12:66622150-66622151;chr12:66638265-66638266		14;2	7;0	20;0	7;0	25;4	8;0	6;0	7;0
K	jcn_only_AA	HVCN1	chr12	-	chr12:111099254-111126429	chr12:111121070-111126429					0;27	0;5	0;38	0;5	0;32	0;20	2;22	0;17
K	alternative_donor	TESC	chr12	-	chr12:117484472-117484581	chr12:117484472-117484576		chr12:117484577-117484581	chr12:117484581-117484582		9;2	0;0	5;0	0;0	3;1	0;0	7;0	0;0
K	jcn_only_AA	RPLP0	chr12	-	chr12:120638635-120638885	chr12:120638695-120638885		chr12:120638635-120638694	chr12:120638634-120638635		114;9	27;0	328;22	66;8	495;34	76;0	425;38	83;8
K	intron_retention	MYL6	chr12	+	chr12:56554455-56555170				chr12:56554454-56554455;chr12:56555170-56555171		31;5	16;5	82;7	133;11	94;10	105;15	101;9	95;13
N	jcn_only_AD	ETV6	chr12	+	chr12:11905514-11992073	chr12:11982164-11992073		chr12:11905514-11982163	chr12:11905513-11905514		17;0	32;0	32;0	49;0	26;0	44;0	26;0	41;6
K	cassette	MMP19	chr12	-	chr12:56231159-56231626	chr12:56231159-56231338;chr12:56231467-56231626		chr12:56231339-56231466			3;61	3;36	5;65	23;353	2;56	0;97	7;99	6;219
K	alternative_donor	TMEM106C	chr12	+	chr12:48357417-48357991	chr12:48357488-48357991		chr12:48357417-48357487	chr12:48357416-48357417		7;0	0;0	19;0	0;0	51;3	3;0	55;3	6;0
K	jcn_only_AA	STAT6	chr12	-	chr12:57493874-57496072	chr12:57494683-57496072					55;0	40;0	41;0	113;0	68;2	68;0	64;0	130;0
K	coord_cassette	ANO6	chr12	+	chr12:45610175-45725077	chr12:45610175-45664244;chr12:45664308-45695796;chr12:45695877-45725077		chr12:45664245-45664307;chr12:45695797-45695876			0;4	0;0	0;4	0;11	0;7	3;7	0;11	9;13
K	cassette	CLEC7A	chr12	-	chr12:10279308-10280345	chr12:10279308-10279638;chr12:10279689-10280345		chr12:10279639-10279688			7;0	0;0	11;6	9;0	6;3	3;0	10;0	0;0
N	intron_retention		chr12	-	chr12:7635326-7635561				chr12:7635325-7635326;chr12:7635561-7635562		0;240	0;378	2;398	0;205	0;523	0;618	0;371	0;893
N	cassette	KIAA1033	chr12	+	chr12:105540925-105546120	chr12:105540925-105543392;chr12:105543528-105546120		chr12:105543393-105543527			0;47	0;55	0;63	0;84	0;55	2;98	0;63	0;103
K	alternative_first_exon	ARHGDIB	chr12	-	chr12:15103659-15114087;chr12:15103659-15114470	chr12:15103659-15109109	chr12:15114471-15114603	chr12:15109110-15109267			85;3	14;0	379;16	54;2	372;22	67;3	389;16	81;2
K	alternative_acceptor	CAPRIN2	chr12	-	chr12:30868076-30869441	chr12:30868079-30869441		chr12:30868076-30868078	chr12:30868075-30868076		0;0	0;0	3;0	0;0	5;0	2;2	0;0	3;0
N	jcn_only_AA	CD163	chr12	-	chr12:7651649-7653734	chr12:7651785-7653734		chr12:7651649-7651784	chr12:7651648-7651649		0;666	0;1417	0;1061	0;549	0;1948	0;2323	0;1280	2;2698
K	intron_retention	KRR1	chr12	-	chr12:75895597-75895702				chr12:75895596-75895597;chr12:75895702-75895703		22;3	27;0	28;2	30;0	35;7	25;0	40;0	20;0
K	intron_retention	OS9	chr12	+	chr12:58109977-58110194				chr12:58109976-58109977;chr12:58110194-58110195		144;2	120;0	256;3	278;5	272;4	249;5	248;2	327;5
N	jcn_only_AA	2019-03-09	chr12	+	chr12:58150868-58151890	chr12:58150868-58151073		chr12:58151074-58151890	chr12:58151890-58151891		6;0	0;0	9;0	30;5	16;0	17;0	8;0	33;0
K	alternative_donor	MMP19,PYM1	chr12	-	chr12:56231792-56232389	chr12:56231792-56232283		chr12:56232284-56232389	chr12:56232389-56232390		36;8	11;4	42;8	228;33	38;4	66;7	77;7	109;20
N	jcn_only_AD	CLEC4E,SLC41A2	chr12	-	chr12:8689863-8691737;chr12:8689863-8691812	chr12:8689863-8690226		chr12:8690227-8691737;chr12:8691738-8691812	chr12:8691737-8691738;chr12:8691812-8691813		2;0	47;0	11;0	313;2	5;0	210;0	2;0	330;0
K	intron_retention	DYRK4	chr12	+	chr12:4714253-4719320				chr12:4714252-4714253;chr12:4719320-4719321		0;0	0;0	6;5	0;0	0;3	0;0	0;0	0;0
K	jcn_only_AD	COPZ1	chr12	+	chr12:54741824-54744259	chr12:54743443-54744259					3;55	2;20	2;100	2;40	11;101	0;30	8;97	6;48
K	intron_retention	CACNA2D4	chr12	-	chr12:1908862-1909165				chr12:1908861-1908862;chr12:1909165-1909166		7;0	1;0	11;3	6;0	19;3	6;0	24;0	13;0
K	intron_retention	GNS	chr12	-	chr12:65134469-65136920				chr12:65134468-65134469;chr12:65136920-65136921		506;2	875;6	409;0	1227;7	643;0	1450;2	565;0	1498;5
K	alternative_donor	RP11-705C15.2	chr12	+	chr12:9809246-9809516	chr12:9809294-9809516		chr12:9809246-9809293	chr12:9809245-9809246		0;0	0;0	6;3	10;7	7;3	0;1	5;3	3;2
K	jcn_only_AD	NOP2,RNF41	chr12	-	chr12:56610398-56615686	chr12:56610398-56615543		chr12:56615544-56615686	chr12:56615686-56615687		3;6	0;3	5;6	0;7	0;7	5;6	0;2	2;9
K	intron_retention	SLC11A2	chr12	-	chr12:51373842-51375421				chr12:51373841-51373842;chr12:51375421-51375422		0;5	0;13	2;19	0;29	2;17	0;27	0;11	7;24
K	cassette	ATXN2	chr12	-	chr12:111890645-111893832	chr12:111890645-111891480;chr12:111891650-111893832		chr12:111891481-111891649			0;7	0;5	0;8	0;8	0;15	0;8	6;14	0;9
K	jcn_only_AA	EIF4B	chr12	+	chr12:53413811-53415589	chr12:53413811-53415499		chr12:53415500-53415589	chr12:53415589-53415590		138;0	41;0	115;2	41;0	99;0	32;0	113;0	49;0
K	jcn_only_AD	DDX11	chr12	+	chr12:31226904-31231323	chr12:31227026-31231323		chr12:31226904-31227025	chr12:31226903-31226904		0;0	0;0	0;5	0;5	2;5	3;2	0;10	0;6
K	cassette	ATP5B	chr12	-	chr12:57038740-57039620	chr12:57038740-57038954;chr12:57039138-57039620		chr12:57038955-57039137			3;289	0;179	9;481	7;271	6;490	0;212	0;590	0;306
N	cassette	GIT2	chr12	-	chr12:110377053-110390896	chr12:110377053-110389016;chr12:110389122-110390896		chr12:110389017-110389121			0;23	0;19	2;39	0;35	0;50	0;24	0;51	0;25
K	jcn_only_AA	DDX11	chr12	+	chr12:31226904-31231396	chr12:31226904-31231323		chr12:31231324-31231396	chr12:31231396-31231397		0;0	0;0	0;0	0;0	0;2	0;3	0;0	2;0
K	alternative_donor	CORO1C,PXN	chr12	-	chr12:109095100-109125204	chr12:109095100-109123920		chr12:109123921-109125204	chr12:109125204-109125205		26;1	18;0	109;1	57;0	91;1	31;0	113;1	52;0
K	alternative_acceptor	ANAPC5	chr12	-	chr12:121766262-121768385	chr12:121766301-121768385		chr12:121766262-121766300	chr12:121766261-121766262		9;12	5;7	8;18	5;10	19;31	5;9	16;29	8;10
K	jcn_only_AA	PCBP2	chr12	+	chr12:53865592-53873189	chr12:53865592-53868652		chr12:53868653-53873189	chr12:53873189-53873190		282;0	153;0	302;0	240;2	475;0	167;0	374;6	266;5
N	jcn_only_AA	DCTN2	chr12	-	chr12:57929629-57939810	chr12:57929630-57939810		chr12:57929629-57929629	chr12:57929628-57929629		49;0	30;0	48;2	65;2	83;0	57;0	106;0	78;0
K	cassette	ZNF140	chr12	+	chr12:133660148-133682095	chr12:133660148-133677572;chr12:133677640-133682095		chr12:133677573-133677639			0;2	0;2	2;2	8;0	8;1	0;2	6;0	0;4
K	jcn_only_AD	RBMS2	chr12	+	chr12:56981444-56982077	chr12:56981449-56982077		chr12:56981444-56981448	chr12:56981443-56981444		0;5	0;8	0;8	0;55	0;9	0;60	0;5	8;48
K	jcn_only_AD	ARHGDIB,ITGB7	chr12	-	chr12:53594231-53594901	chr12:53594231-53594855		chr12:53594856-53594901	chr12:53594901-53594902		0;0	0;0	0;57	3;24	0;24	0;6	0;18	0;20
K	intron_retention	ZNF384	chr12	-	chr12:6787627-6788111				chr12:6787626-6787627;chr12:6788111-6788112		0;0	0;0	6;2	3;0	0;2	2;0	6;2	0;2
K	jcn_only_AA	IFFO1	chr12	-	chr12:6657992-6658641	chr12:6658016-6658641		chr12:6657992-6658015	chr12:6657991-6657992		3;0	3;0	11;2	14;0	16;0	8;2	18;0	6;0
K	cassette	GIT2	chr12	-	chr12:110377053-110385060	chr12:110377053-110383064;chr12:110383155-110385060		chr12:110383065-110383154			2;15	2;11	15;31	2;31	24;33	2;19	18;33	9;29
N	intron_retention		chr12	+	chr12:121670429-121671427				chr12:121670428-121670429;chr12:121671427-121671428		3;17	2;18	7;34	18;157	9;42	8;70	6;34	5;55
K	alternative_acceptor	ASIC1,PCBP2	chr12	+	chr12:53861628-53862563	chr12:53861628-53862560		chr12:53862561-53862563	chr12:53862563-53862564		38;61	23;28	44;67	20;42	60;95	11;40	47;103	28;54
K	intron_retention	CD163	chr12	-	chr12:7632510-7633756				chr12:7632509-7632510;chr12:7633756-7633757		398;91	535;197	589;142	276;88	872;178	889;282	575;117	1228;381
N	jcn_only_AA		chr12	+	chr12:54893250-54894326	chr12:54893250-54894316		chr12:54894317-54894326	chr12:54894326-54894327		0;169	0;93	0;282	0;151	0;453	0;189	0;432	2;278
K	intron_retention	STAT6	chr12	-	chr12:57502083-57503825				chr12:57502082-57502083;chr12:57503825-57503826		0;0	0;2	5;3	9;10	0;3	0;2	0;4	5;2
K	intron_retention	SLC25A3	chr12	+	chr12:98987914-98989504				chr12:98987913-98987914;chr12:98989504-98989505		106;4	57;0	209;3	98;0	267;5	95;2	305;5	113;5
N	jcn_only_AA	SH2B3,TBC1D15	chr12	+	chr12:111884838-111884928	chr12:111884838-111884925		chr12:111884926-111884928	chr12:111884928-111884929		61;0	15;0	44;0	36;0	102;2	33;0	110;2	48;0
N	jcn_only_AD	M6PR,SLC11A2	chr12	-	chr12:9099002-9102083	chr12:9099002-9101902		chr12:9101903-9102083	chr12:9102083-9102084		116;0	75;0	485;0	385;11	491;0	292;0	482;8	318;0
N	alternative_acceptor		chr12	.	chr12:7980206-8082279	chr12:8078545-8082279		chr12:7980206-8078544	chr12:7980205-7980206		0;1	0;2	2;2	0;1	0;3	0;2	0;1	0;3
K	alternative_last_exon	BICD1	chr12	+	chr12:32260479-32369180	chr12:32260479-32260595	chr12:32369181-32369393	chr12:32260596-32261263			1;0	0;0	0;0	0;0	2;2	2;1	4;2	1;0
K	alternative_donor	ARNTL2	chr12	+	chr12:27486037-27521194	chr12:27486070-27521194		chr12:27486037-27486069	chr12:27486036-27486037		2;0	7;1	0;0	17;0	2;0	25;0	6;0	25;0
N	intron_retention		chr12	-	chr12:125397987-125398214				chr12:125397986-125397987;chr12:125398214-125398215		8;203	0;401	0;659	0;1086	0;906	0;980	0;782	0;1371
N	alternative_acceptor		chr12	+	chr12:54893250-54894326	chr12:54893250-54894316		chr12:54894317-54894326	chr12:54894326-54894327		0;89	0;49	0;145	0;81	0;241	0;104	0;222	2;151
N	alternative_acceptor	SH2B3,TBC1D15	chr12	+	chr12:111884838-111884928	chr12:111884838-111884925		chr12:111884926-111884928	chr12:111884928-111884929		61;0	15;0	44;0	36;0	102;3	33;0	110;4	48;0
K	jcn_only_AA	DAZAP2	chr12	+	chr12:51634246-51634750	chr12:51634246-51634654		chr12:51634655-51634750	chr12:51634750-51634751		0;218	5;151	0;368	0;272	0;408	0;247	7;395	0;330
N	alternative_acceptor	IFFO1	chr12	-	chr12:6650809-6657230	chr12:6651020-6657230		chr12:6650809-6651019	chr12:6650808-6650809		44;1	14;0	61;3	25;0	77;2	27;2	81;1	34;1
K	cassette	WNK1	chr12	+	chr12:987528-989886	chr12:987528-988738;chr12:989198-989886		chr12:988739-989197			0;0	5;2	2;3	0;2	3;2	14;1	19;3	8;3
K	intron_retention	MMP19	chr12	-	chr12:56233526-56234450				chr12:56233525-56233526;chr12:56234450-56234451		49;0	24;0	31;0	268;13	50;0	76;0	84;0	127;6
N	jcn_only_AD	KIAA1033	chr12	+	chr12:105546230-105550503	chr12:105549009-105550503		chr12:105546230-105549008	chr12:105546229-105546230		26;0	31;0	53;0	51;2	55;0	99;0	63;0	123;0
N	alternative_donor	STAT2	chr12	-	chr12:56745235-56748202;chr12:56745235-56748242	chr12:56745235-56748249		chr12:56748203-56748242;chr12:56748243-56748249	chr12:56748242-56748243;chr12:56748249-56748250		0;30	0;49	3;45	11;216	3;36	7;188	0;33	7;223
K	cassette	POP5	chr12	-	chr12:121017401-121018917	chr12:121017401-121017576;chr12:121017727-121018917		chr12:121017577-121017726			0;6	0;4	0;21	0;3	0;41	0;4	5;32	0;3
K	intron_retention	NCOR2	chr12	-	chr12:124841353-124846671				chr12:124841352-124841353;chr12:124846671-124846672		10;0	0;0	24;0	13;2	22;0	6;0	24;2	6;0
K	alternative_last_exon	IKBIP	chr12	-	chr12:99008119-99028073	chr12:99020545-99028073	chr12:99007183-99008118	chr12:99018027-99020544			11;7	6;3	16;13	5;4	29;22	2;4	22;25	6;3
K	cassette	ARHGAP9	chr12	-	chr12:57866472-57867824	chr12:57866472-57867385;chr12:57867492-57867824		chr12:57867386-57867491			0;22	2;3	11;39	3;4	16;58	0;5	13;56	0;8
K	jcn_only_AD	COPS7A	chr12	+	chr12:6833417-6833779;chr12:6833319-6833779	chr12:6833346-6833779		chr12:6833319-6833345;chr12:6833346-6833416	chr12:6833318-6833319;chr12:6833345-6833346		5;9	2;6	6;25	18;17	8;17	8;8	15;23	8;15
K	cassette	ZNF385A	chr12	-	chr12:54764881-54767756	chr12:54764881-54765256;chr12:54765500-54767756		chr12:54765257-54765499			3;146	0;66	0;99	0;147	6;149	7;139	3;124	3;185
K	intron_retention	OASL	chr12	-	chr12:121461941-121465378				chr12:121461940-121461941;chr12:121465378-121465379		0;0	58;0	9;0	572;10	3;0	365;7	5;0	401;9
K	alternative_acceptor	DYNLL1	chr12	+	chr12:120934020-120934218	chr12:120934020-120934204		chr12:120934205-120934218	chr12:120934218-120934219		102;11	93;5	184;16	249;22	189;13	145;15	198;17	206;16
K	intron_retention	PFDN5	chr12	+	chr12:53690060-53691633				chr12:53690059-53690060;chr12:53691633-53691634		286;3	105;2	307;3	126;0	443;7	164;3	393;5	219;2
K	intron_retention	KDM2B	chr12	-	chr12:121880834-121881482				chr12:121880833-121880834;chr12:121881482-121881483		14;3	9;2	19;2	10;0	19;0	2;0	24;0	16;0
N	alternative_donor	CLEC2D	chr12	+	chr12:9822392-9833518;chr12:9820868-9833518;chr12:9809753-9833518	chr12:9821392-9833518		chr12:9809753-9820867;chr12:9820868-9821391;chr12:9821392-9822391	chr12:9809752-9809753;chr12:9820867-9820868;chr12:9821391-9821392		7;1	0;0	2;0	3;1	0;0	0;0	0;0	2;0
K	intron_retention	DDIT3	chr12	-	chr12:57910964-57911051				chr12:57910963-57910964;chr12:57911051-57911052		7;0	5;0	11;5	27;2	13;2	9;2	11;2	13;0
N	alternative_donor	LRP1	chr12	+	chr12:57532365-57535156	chr12:57534166-57535156		chr12:57532365-57534165	chr12:57532364-57532365		238;0	43;0	194;0	42;0	398;0	95;0	359;0	101;0
K	coord_cassette	WNK1	chr12	+	chr12:971437-987377	chr12:971437-977031;chr12:978271-980430;chr12:980515-987377		chr12:977032-978270;chr12:980431-980514			0;2	0;0	14;1	0;1	33;2	0;0	24;2	14;2
K	cassette	ERC1	chr12	+	chr12:1346071-1399017	chr12:1346071-1372199;chr12:1372332-1399017		chr12:1372200-1372331			0;12	0;9	0;14	0;19	0;23	2;13	0;20	0;23
N	intron_retention		chr12	-	chr12:125397737-125397964				chr12:125397736-125397737;chr12:125397964-125397965		0;132	0;116	0;323	0;547	2;360	0;566	0;399	0;687
N	jcn_only_AA		chr12	-	chr12:56742589-56743128	chr12:56742636-56743128		chr12:56742589-56742635	chr12:56742588-56742589		0;0	0;0	0;0	3;3	0;0	0;3	0;0	0;0
N	alternative_donor	RPL6	chr12	-	chr12:112846461-112847390;chr12:112846461-112846853	chr12:112846461-112847214		chr12:112846854-112847214;chr12:112847215-112847390	chr12:112847214-112847215;chr12:112847390-112847391		26;3	10;4	59;10	27;4	80;10	16;4	74;7	44;7
K	cassette	BLOC1S1,RP11-644F5.10	chr12	+	chr12:56110502-56112874	chr12:56110502-56110716;chr12:56110790-56112874		chr12:56110717-56110789			0;45	2;27	0;98	0;62	2;158	5;66	2;123	2;87
K	alternative_first_exon	PXN	chr12	-	chr12:120662181-120703419;chr12:120662181-120664164	chr12:120662181-120662445	chr12:120703420-120703574;chr12:120664165-120664647	chr12:120662446-120662530			20;0	9;1	49;0	2;3	36;1	6;5	48;1	13;2
K	intron_retention	MGST1	chr12	+	chr12:16506402-16507164				chr12:16506401-16506402;chr12:16507164-16507165		0;0	2;0	0;0	0;8	0;0	0;2	0;0	0;0
K	cassette	MED21	chr12	+	chr12:27175555-27180279	chr12:27175555-27179352;chr12:27179468-27180279		chr12:27179353-27179467			0;12	0;10	0;18	0;18	0;26	2;13	0;24	0;19
N	cassette	CLEC4E	chr12	-	chr12:8688802-8691812	chr12:8688802-8689710;chr12:8689863-8691812		chr12:8689711-8689862			0;7	2;83	0;11	16;403	0;3	10;228	0;3	0;420
K	intron_retention	ARHGAP9	chr12	-	chr12:57869399-57869615				chr12:57869398-57869399;chr12:57869615-57869616		14;0	0;0	31;0	0;0	44;2	10;0	49;2	5;0
N	alternative_donor	CD4	chr12	+	chr12:6923467-6923924;chr12:6923445-6923924	chr12:6923630-6923924		chr12:6923445-6923466;chr12:6923467-6923629	chr12:6923444-6923445;chr12:6923466-6923467		146;2	22;1	120;6	56;0	254;5	77;1	221;8	124;2
K	jcn_only_AA	DYRK4	chr12	+	chr12:4721885-4722680	chr12:4721885-4722677		chr12:4722678-4722680	chr12:4722680-4722681		2;20	0;14	0;17	0;16	0;32	0;16	0;20	0;15
K	alternative_acceptor	LMBR1L	chr12	-	chr12:49495047-49495254	chr12:49495107-49495254		chr12:49495047-49495106	chr12:49495046-49495047		0;7	2;11	0;4	0;9	0;5	0;10	0;6	2;20
K	intron_retention	PTPRO	chr12	+	chr12:15747992-15749023				chr12:15747991-15747992;chr12:15749023-15749024		18;5	7;0	30;4	28;0	61;7	36;2	60;10	31;5
N	intron_retention		chr12	+	chr12:9809753-9833518				chr12:9809752-9809753;chr12:9833518-9833519		5;2	0;2	0;2	0;9	0;3	0;0	0;4	0;10
K	intron_retention	NECAP1	chr12	+	chr12:8244447-8245271				chr12:8244446-8244447;chr12:8245271-8245272		17;2	7;0	16;0	57;0	16;0	33;0	24;0	26;2
K	intron_retention	AEBP2	chr12	+	chr12:19671048-19671608				chr12:19671047-19671048;chr12:19671608-19671609		2;3	0;0	5;5	6;5	3;5	0;3	2;0	3;2
N	intron_retention		chr12	+	chr12:105549009-105550503				chr12:105549008-105549009;chr12:105550503-105550504		0;2	0;0	0;0	2;5	0;7	0;4	0;0	0;3
K	jcn_only_AA	FBXO21	chr12	-	chr12:117595869-117603289	chr12:117595890-117603289		chr12:117595869-117595889	chr12:117595868-117595869		6;0	3;0	0;6	0;2	11;2	2;0	14;5	6;2
K	intron_retention	ARPC3	chr12	-	chr12:110880873-110883256				chr12:110880872-110880873;chr12:110883256-110883257		0;0	2;0	0;2	0;2	0;4	0;0	0;0	0;5
K	alternative_first_exon	LRMP	chr12	+	chr12:25205891-25215753	chr12:25214588-25215753	chr12:25205446-25205890	chr12:25214526-25214587			6;1	1;0	1;1	0;0	4;8	0;0	7;2	1;0
K	jcn_only_AA	PEX5	chr12	+	chr12:7355301-7356051	chr12:7355301-7356027		chr12:7356028-7356051	chr12:7356051-7356052		0;9	2;0	3;17	0;2	0;10	0;2	2;14	0;11
K	alternative_acceptor	PCED1B-AS1	chr12	-	chr12:47600369-47603063	chr12:47600372-47603063		chr12:47600369-47600371	chr12:47600368-47600369		0;0	0;0	10;7	0;0	10;11	0;0	0;14	0;0
K	cassette	MON2	chr12	+	chr12:62959161-62960101	chr12:62959161-62959793;chr12:62959812-62960101		chr12:62959794-62959811			0;3	0;0	0;6	0;8	0;4	9;2	0;2	13;2
K	intron_retention		chr12	-	chr12:56742844-56742946				chr12:56742843-56742844;chr12:56742946-56742947		49;0	125;8	53;2	317;22	67;2	330;7	42;2	353;16
K	alternative_first_exon	CS,RP11-977G19.10,RSRC2	chr12	-	chr12:56680430-56693943	chr12:56680430-56685414	chr12:56693944-56694176	chr12:56685415-56685577			43;1	30;0	84;2	44;2	83;1	34;0	95;3	41;1
K	jcn_only_AA	APPL2	chr12	-	chr12:105593303-105597480	chr12:105593310-105597480		chr12:105593303-105593309	chr12:105593302-105593303		0;33	0;9	2;26	0;7	0;50	0;2	0;53	0;3
N	coord_cassette	M6PR	chr12	-	chr12:9094537-9096396	chr12:9094537-9095011;chr12:9095139-9096000;chr12:9096132-9096396		chr12:9095012-9095138;chr12:9096001-9096131			0;245	0;153	0;567	7;447	0;686	0;340	3;665	2;418
K	cassette	VEZT	chr12	+	chr12:95645848-95650925	chr12:95645848-95650325;chr12:95650399-95650925		chr12:95650326-95650398			0;8	3;4	15;11	13;13	20;9	6;12	15;12	19;15
K	alternative_acceptor	ARL6IP4,OAS3	chr12	+	chr12:123465814-123466141	chr12:123465814-123466117		chr12:123466118-123466141	chr12:123466141-123466142		16;7	13;3	36;7	15;0	64;18	13;6	63;6	15;4
K	intron_retention	DNM1L	chr12	+	chr12:32890096-32891197				chr12:32890095-32890096;chr12:32891197-32891198		9;2	7;4	35;0	26;4	25;2	16;2	28;0	22;0
K	cassette	YBX3	chr12	-	chr12:10856748-10865809	chr12:10856748-10862506;chr12:10862714-10865809		chr12:10862507-10862713			32;41	42;72	20;45	27;43	25;56	15;37	25;37	15;46
K	intron_retention	ANAPC5	chr12	-	chr12:121783835-121784698				chr12:121783834-121783835;chr12:121784698-121784699		40;2	10;2	33;0	18;0	66;0	23;0	72;2	30;0
K	cassette	RSRC2	chr12	-	chr12:123003577-123005931	chr12:123003577-123005050;chr12:123005129-123005931		chr12:123005051-123005128			16;2	18;4	35;4	32;6	24;4	26;6	33;6	31;4
K	intron_retention	LINC01089	chr12	-	chr12:122234149-122237752				chr12:122234148-122234149;chr12:122237752-122237753		0;0	0;0	0;0	0;3	0;5	2;0	0;2	0;2
K	intron_retention	IFFO1	chr12	-	chr12:6660168-6660563				chr12:6660167-6660168;chr12:6660563-6660564		5;2	2;0	8;2	2;0	8;0	2;0	13;2	8;0
K	jcn_only_AA	BCL2L14,RNF10	chr12	+	chr12:121000874-121001149	chr12:121000874-121001134		chr12:121001135-121001149	chr12:121001149-121001150		42;0	47;0	101;6	95;0	111;0	68;0	86;0	70;6
K	intron_retention	ACRBP	chr12	-	chr12:6752838-6753302				chr12:6752837-6752838;chr12:6753302-6753303		5;0	0;0	2;0	0;0	3;2	0;0	0;2	2;0
K	intron_retention	RPLP0	chr12	-	chr12:120636435-120636656				chr12:120636434-120636435;chr12:120636656-120636657		0;226	0;102	10;520	0;72	0;685	0;84	0;599	0;93
K	alternative_donor	CCDC59,ING4	chr12	-	chr12:82751049-82752457	chr12:82751049-82752001		chr12:82752002-82752457	chr12:82752457-82752458		0;1	0;2	5;5	0;5	0;4	0;4	8;5	0;3
K	intron_retention	CLEC7A	chr12	-	chr12:10279689-10280345				chr12:10279688-10279689;chr12:10280345-10280346		0;19	0;0	10;15	0;3	0;23	0;2	0;11	0;2
K	intron_retention	PRPF40B	chr12	+	chr12:50037181-50037473				chr12:50037180-50037181;chr12:50037473-50037474		2;2	3;8	7;10	0;7	3;2	0;6	5;7	0;9
K	cassette	PPFIBP1	chr12	+	chr12:27829533-27832421	chr12:27829533-27829996;chr12:27830030-27832421		chr12:27829997-27830029			0;0	0;1	0;2	0;2	2;2	0;3	0;4	0;0
K	alternative_first_exon	CD63,CPM	chr12	-	chr12:56121124-56121395;chr12:56121124-56121647	chr12:56121124-56122059	chr12:56121396-56121599;chr12:56121648-56121684	chr12:56122060-56122266			4;429	1;279	0;674	1;573	2;841	0;509	1;744	2;650
K	cassette	PCBP2	chr12	+	chr12:53861078-53862560	chr12:53861078-53861588;chr12:53861628-53862560		chr12:53861589-53861627			72;164	58;84	67;151	58;95	117;226	59;90	89;224	75;122
N	alternative_donor	OAS1	chr12	+	chr12:113349041-113354313;chr12:113349031-113354313	chr12:113349064-113354313		chr12:113349031-113349040;chr12:113349041-113349063	chr12:113349030-113349031;chr12:113349040-113349041		17;0	120;3	23;0	458;17	24;1	330;4	24;1	408;20
K	jcn_only_AA	RP11-745O10.4,TMBIM4	chr12	-	chr12:66547229-66563634	chr12:66554953-66563634		chr12:66547229-66554952	chr12:66547228-66547229		72;0	68;0	122;0	125;0	170;0	93;2	153;0	150;3
K	alternative_acceptor	CHFR	chr12	-	chr12:133428321-133430016	chr12:133428324-133430016		chr12:133428321-133428323	chr12:133428320-133428321		5;0	6;4	14;7	9;6	18;3	13;6	18;9	23;5
K	intron_retention	IFFO1	chr12	-	chr12:6657324-6657590				chr12:6657323-6657324;chr12:6657590-6657591		8;10	2;4	9;15	2;3	14;15	3;2	8;12	5;0
K	cassette	VPS29	chr12	-	chr12:110929928-110933816	chr12:110929928-110930800;chr12:110931037-110933816		chr12:110930801-110931036			0;80	0;76	0;140	0;176	0;211	0;173	8;212	0;207
N	alternative_donor	RP11-705C15.2	chr12	+	chr12:9800586-9806278	chr12:9801530-9806278		chr12:9800586-9801529	chr12:9800585-9800586		0;5	0;2	0;12	0;9	0;8	0;3	0;12	3;11
K	intron_retention	NR2C1	chr12	-	chr12:95451655-95452085				chr12:95451654-95451655;chr12:95452085-95452086		0;0	2;0	3;2	5;0	5;2	3;2	5;4	0;2
K	intron_retention	STAT2	chr12	-	chr12:56740409-56740602				chr12:56740408-56740409;chr12:56740602-56740603		28;0	103;0	61;0	289;9	53;0	307;0	44;0	386;0
K	jcn_only_AA	SBNO1	chr12	-	chr12:123830115-123832575	chr12:123830118-123832575		chr12:123830115-123830117	chr12:123830114-123830115		7;6	5;0	7;7	9;8	9;3	3;6	8;9	5;3
K	cassette	RFC5	chr12	+	chr12:118454698-118456876	chr12:118454698-118455494;chr12:118455621-118456876		chr12:118455495-118455620			3;0	0;0	7;0	0;0	23;1	0;0	23;2	3;0
N	cassette	PCBP2,RP11-793H13.8	chr12	+	chr12:53849786-53854798	chr12:53849786-53853055;chr12:53853188-53854798		chr12:53853056-53853187			0;347	5;180	0;281	0;194	5;398	0;173	0;364	0;219
K	alternative_acceptor	ARL6IP4	chr12	+	chr12:123465847-123466141	chr12:123465847-123466117		chr12:123466118-123466141	chr12:123466141-123466142		20;11	15;4	26;12	11;0	55;21	18;11	56;12	14;7
K	intron_retention	PTPN6	chr12	+	chr12:7067237-7069089				chr12:7067236-7067237;chr12:7069089-7069090		92;0	16;0	111;4	48;0	131;0	48;0	139;2	64;0
K	intron_retention	SCARB1	chr12	-	chr12:125267358-125270902				chr12:125267357-125267358;chr12:125270902-125270903		16;6	5;0	19;4	7;0	36;5	0;0	28;2	0;0
K	intron_retention	LETMD1	chr12	+	chr12:51445991-51447560				chr12:51445990-51445991;chr12:51447560-51447561		6;0	2;0	5;0	5;0	8;3	3;0	8;2	3;0
N	intron_retention		chr12	+	chr12:49521740-49578791				chr12:49521739-49521740;chr12:49578791-49578792		0;228	0;149	0;373	0;225	0;1019	0;247	2;974	0;282
N	jcn_only_AA	KLRG1	chr12	+	chr12:9142314-9144801	chr12:9142314-9142807					0;0	0;0	0;0	0;0	13;0	0;0	10;2	0;0
K	cassette	ZNF605	chr12	-	chr12:133522384-133532828	chr12:133522384-133524733;chr12:133524857-133532828		chr12:133524734-133524856			0;0	0;0	0;1	0;2	5;0	0;0	0;1	3;1
K	jcn_only_AD	RAD52	chr12	-	chr12:1036430-1038984	chr12:1036430-1038929		chr12:1038930-1038984	chr12:1038984-1038985		2;0	0;0	0;0	5;2	2;0	2;0	3;0	0;0
K	intron_retention	MMP19	chr12	-	chr12:56234598-56234889				chr12:56234597-56234598;chr12:56234889-56234890		0;19	0;6	0;22	8;139	0;16	0;34	0;30	0;76
K	intron_retention	R3HDM2	chr12	-	chr12:57691171-57691872				chr12:57691170-57691171;chr12:57691872-57691873		13;0	10;2	11;0	7;0	6;3	9;0	17;2	14;0
K	intron_retention	P2RX4	chr12	+	chr12:121670896-121671325				chr12:121670895-121670896;chr12:121671325-121671326		24;0	32;0	69;0	274;7	83;0	88;0	57;0	107;2
K	jcn_only_AD	SCAF11	chr12	-	chr12:46316366-46316766	chr12:46316366-46316718		chr12:46316719-46316766	chr12:46316766-46316767		2;35	0;25	2;66	0;41	0;80	0;49	0;61	2;49
K	alternative_first_exon	GNS,NACA	chr12	-	chr12:65146538-65152864	chr12:65146538-65150446	chr12:65152865-65153227	chr12:65150447-65150542			218;1	377;5	256;1	751;3	292;4	663;14	305;2	857;5
K	cassette	DYRK4	chr12	+	chr12:4677215-4698102	chr12:4677215-4689989;chr12:4690144-4698102		chr12:4689990-4690143			0;3	0;0	0;3	0;2	0;3	0;0	3;6	0;2
K	alternative_first_exon	BCL2L14	chr12	+	chr12:12224072-12232232	chr12:12224590-12232232	chr12:12223872-12224071	chr12:12224396-12224589			0;0	4;11	0;1	1;2	0;0	1;8	0;0	0;5
N	jcn_only_AA	IFFO1	chr12	-	chr12:6650809-6657230	chr12:6651020-6657230		chr12:6650809-6651019	chr12:6650808-6650809		44;0	14;0	61;0	25;0	77;0	27;2	81;0	34;0
K	cassette	ZNF384	chr12	-	chr12:6787627-6788111	chr12:6787627-6787828;chr12:6787877-6788111		chr12:6787829-6787876			0;6	0;4	6;12	3;9	0;11	2;7	6;13	0;12
K	jcn_only_AD	TMPO	chr12	+	chr12:98931351-98940136	chr12:98938840-98940136					9;11	6;0	9;19	0;5	19;51	0;6	19;60	2;7
K	cassette	OS9	chr12	+	chr12:58089822-58109542	chr12:58089822-58090057;chr12:58090157-58109542		chr12:58090058-58090156			0;152	0;130	0;241	0;285	2;290	0;290	0;235	0;338
K	cassette	USP15	chr12	+	chr12:62749257-62775270	chr12:62749257-62768170;chr12:62768317-62775270		chr12:62768171-62768316			24;1	33;3	24;3	95;3	36;3	65;5	26;2	99;4
K	jcn_only_AA	FOXM1	chr12	-	chr12:2981411-2983142	chr12:2981414-2983142		chr12:2981411-2981413	chr12:2981410-2981411		0;0	0;0	5;8	0;0	8;22	0;0	17;17	2;0
K	intron_retention	BIN2	chr12	-	chr12:51678572-51681891				chr12:51678571-51678572;chr12:51681891-51681892		45;2	26;0	93;3	58;9	61;0	58;2	68;7	66;6
N	alternative_acceptor	CD163	chr12	-	chr12:7623989-7632455	chr12:7623994-7632455		chr12:7623989-7623993	chr12:7623988-7623989		0;189	0;315	0;435	6;230	0;555	0;655	0;367	17;1018
K	intron_retention	MAP3K12	chr12	-	chr12:53878150-53878839				chr12:53878149-53878150;chr12:53878839-53878840		6;0	6;0	8;0	11;0	6;2	8;0	13;2	10;0
K	intron_retention	LRRK2	chr12	+	chr12:40760880-40761445				chr12:40760879-40760880;chr12:40761445-40761446		9;0	17;0	11;0	8;0	11;0	32;4	8;0	26;0
K	intron_retention	IRAK4	chr12	+	chr12:44162076-44165022				chr12:44162075-44162076;chr12:44165022-44165023		9;2	8;0	17;0	11;2	11;0	13;2	8;0	15;2
N	jcn_only_AA	RASSF8	chr12	+	chr12:113376513-113379452	chr12:113376513-113379374		chr12:113379375-113379452	chr12:113379452-113379453		0;2	0;119	0;20	9;372	0;15	0;326	0;15	7;466
K	intron_retention	VPS29	chr12	-	chr12:110937352-110939853				chr12:110937351-110937352;chr12:110939853-110939854		15;0	6;2	31;0	44;2	33;2	22;2	49;0	40;6
K	jcn_only_AA	ANO6,LRMP	chr12	+	chr12:45695877-45725077	chr12:45695877-45706981		chr12:45706982-45725077	chr12:45725077-45725078		25;0	26;0	52;0	48;0	55;0	56;2	65;0	63;0
N	cassette	CEP290	chr12	-	chr12:88447524-88449352	chr12:88447524-88448116;chr12:88448191-88449352		chr12:88448117-88448190			0;2	0;2	0;4	2;1	0;3	0;2	0;1	0;3
K	intron_retention	PXN	chr12	-	chr12:120653077-120659425				chr12:120653076-120653077;chr12:120659425-120659426		25;3	7;3	40;6	13;7	40;9	10;0	33;10	10;3
K	jcn_only_AD	FBRSL1	chr12	+	chr12:133147818-133148873	chr12:133148111-133148873		chr12:133147818-133148110	chr12:133147817-133147818		2;0	0;6	0;6	0;5	0;7	0;2	0;5	0;7
K	jcn_only_AA	RSRC2	chr12	-	chr12:123003577-123005050	chr12:123003599-123005050		chr12:123003577-123003598	chr12:123003576-123003577		0;0	0;0	3;2	6;3	5;0	6;0	5;2	5;5
K	alternative_donor	RHNO1	chr12	+	chr12:2994659-2997076	chr12:2994701-2997076		chr12:2994659-2994700	chr12:2994658-2994659		2;14	0;8	0;26	0;5	0;45	5;10	5;40	0;8
K	alternative_acceptor	ZNF664	chr12	+	chr12:124458568-124472592	chr12:124458568-124472589		chr12:124472590-124472592	chr12:124472592-124472593		2;4	2;2	17;12	9;6	10;9	0;6	9;10	6;9
K	intron_retention	OS9	chr12	+	chr12:58109754-58109874				chr12:58109753-58109754;chr12:58109874-58109875		78;0	43;0	181;4	244;0	188;6	191;5	144;3	208;6
K	coord_cassette	CD4	chr12	+	chr12:6898829-6923307	chr12:6898829-6909237;chr12:6909354-6909472;chr12:6909638-6923307		chr12:6909238-6909353;chr12:6909473-6909637			8;342	3;72	9;198	0;91	18;359	7;135	16;384	6;199
K	jcn_only_AA	APPL2	chr12	-	chr12:105601808-105601935	chr12:105601826-105601935		chr12:105601808-105601825	chr12:105601807-105601808		15;0	2;0	41;2	2;0	52;2	0;0	36;0	9;0
N	intron_retention		chr12	+	chr12:56548910-56553406				chr12:56548909-56548910;chr12:56553406-56553407		0;184	0;139	0;500	0;490	2;695	3;443	6;611	0;572
N	alternative_donor	SH2B3	chr12	+	chr12:111856682-111884556;chr12:111882663-111884556	chr12:111858293-111884556		chr12:111856682-111858292;chr12:111858293-111882662	chr12:111856681-111856682;chr12:111858292-111858293		38;0	6;0	31;1	35;0	53;2	25;0	70;1	26;0
K	intron_retention	CYP27B1	chr12	-	chr12:58158995-58159079				chr12:58158994-58158995;chr12:58159079-58159080		3;0	41;0	0;0	160;15	0;0	145;8	0;0	194;10
K	cassette	OLR1	chr12	-	chr12:10312621-10313384	chr12:10312621-10312945;chr12:10313062-10313384		chr12:10312946-10313061			0;6	0;6	0;35	5;38	0;3	0;5	3;12	0;26
K	intron_retention	RPL41	chr12	+	chr12:56510584-56510972				chr12:56510583-56510584;chr12:56510972-56510973		1528;0	1078;5	1718;5	674;5	2652;8	958;2	2370;6	1332;3
K	intron_retention	PCBP2	chr12	+	chr12:53861078-53862560				chr12:53861077-53861078;chr12:53862560-53862561		72;6	58;5	67;6	58;5	117;7	59;10	89;5	75;7
N	intron_retention		chr12	+	chr12:6646557-6646782				chr12:6646556-6646557;chr12:6646782-6646783		0;294	0;519	2;484	0;328	0;1111	0;807	0;815	0;951
K	cassette	RNF34	chr12	+	chr12:121838022-121853961	chr12:121838022-121840544;chr12:121840611-121853961		chr12:121840545-121840610			0;1	5;1	13;2	18;2	5;0	14;1	13;1	16;0
K	intron_retention	METTL21B	chr12	+	chr12:58166912-58168411				chr12:58166911-58166912;chr12:58168411-58168412		0;0	0;2	0;0	0;2	0;0	8;2	0;0	2;0
N	alternative_donor	NCOR2	chr12	-	chr12:124821727-124824551	chr12:124821727-124824542		chr12:124824543-124824551	chr12:124824551-124824552		33;0	16;0	74;2	36;0	106;0	15;0	61;0	30;0
K	cassette	NCOR2	chr12	-	chr12:124857157-124862782	chr12:124857157-124858958;chr12:124859010-124862782		chr12:124858959-124859009			18;4	8;2	35;8	16;9	45;18	10;6	20;11	13;4
K	alternative_acceptor	APPL2	chr12	-	chr12:105593303-105597480	chr12:105593310-105597480		chr12:105593303-105593309	chr12:105593302-105593303		0;16	0;4	2;13	0;3	0;24	0;1	0;26	0;2
K	intron_retention	DRAM1	chr12	+	chr12:102295212-102314993				chr12:102295211-102295212;chr12:102314993-102314994		0;0	0;3	0;2	7;9	6;0	8;7	0;0	9;6
N	jcn_only_AD	FAM60A,NAA25	chr12	-	chr12:31451159-31478957;chr12:31451159-31457919	chr12:31451159-31457915		chr12:31457916-31457919;chr12:31457920-31478957	chr12:31457919-31457920;chr12:31478957-31478958		0;0	10;3	7;2	15;7	5;2	15;3	8;2	14;7
K	cassette	CLEC7A	chr12	-	chr12:10278048-10280345	chr12:10278048-10279169;chr12:10279308-10280345		chr12:10279170-10279307			32;24	7;2	93;24	35;10	60;21	13;7	47;13	31;4
K	alternative_acceptor	SH2B3	chr12	+	chr12:111856682-111884556	chr12:111856682-111882542		chr12:111882543-111884556	chr12:111884556-111884557		36;3	6;1	30;2	33;3	51;5	24;2	68;4	25;3
K	coord_cassette	KANSL2	chr12	-	chr12:49054403-49061475	chr12:49054403-49054977;chr12:49055027-49056342;chr12:49056438-49061475		chr12:49054978-49055026;chr12:49056343-49056437			0;1	5;0	20;1	13;0	19;1	14;0	20;2	11;1
K	jcn_only_AA	SH2B3	chr12	+	chr12:111856682-111884556	chr12:111856682-111882542		chr12:111882543-111884556	chr12:111884556-111884557		36;0	6;0	30;0	33;0	51;5	24;0	68;0	25;0
K	alternative_first_exon	CHFR,PARP11	chr12	-	chr12:3939185-3982377	chr12:3939185-3973001	chr12:3982378-3982614	chr12:3973002-3973123			2;2	5;8	6;2	15;3	8;9	12;17	6;4	12;22
K	intron_retention	STAT2	chr12	-	chr12:56743046-56743209				chr12:56743045-56743046;chr12:56743209-56743210		20;0	76;6	42;5	285;45	48;2	286;20	33;2	308;26
N	alternative_donor	TMEM5	chr12	+	chr12:64178853-64195870	chr12:64183712-64195870		chr12:64178853-64183711	chr12:64178852-64178853		3;0	2;0	13;1	9;0	13;0	7;0	14;0	6;0
K	cassette	NCOR2	chr12	-	chr12:124934414-124950718	chr12:124934414-124941651;chr12:124941709-124950718		chr12:124941652-124941708			0;16	0;8	0;20	0;19	0;31	0;11	3;32	0;12
K	alternative_first_exon	VPS29	chr12	-	chr12:110934009-110936624;chr12:110934009-110939853	chr12:110934009-110937339	chr12:110936625-110936664;chr12:110939854-110939922	chr12:110937340-110937351			9;7	12;5	41;23	50;29	83;24	58;15	68;32	71;29
K	intron_retention	FKBP11	chr12	-	chr12:49317388-49317564				chr12:49317387-49317388;chr12:49317564-49317565		0;0	0;0	0;0	0;0	0;2	0;3	3;0	0;2
K	jcn_only_AA	ALKBH2	chr12	-	chr12:109530593-109531051	chr12:109530743-109531051		chr12:109530593-109530742	chr12:109530592-109530593		0;0	2;0	0;0	0;0	2;2	0;0	0;2	0;0
N	jcn_only_AA	CD163	chr12	-	chr12:7640684-7649408;chr12:7647862-7649408	chr12:7647998-7649408					2;677	2;1133	0;1053	0;600	0;1736	9;2052	2;1205	6;2672
K	intron_retention	DYRK4	chr12	+	chr12:4699607-4700325				chr12:4699606-4699607;chr12:4700325-4700326		7;4	0;0	6;2	6;0	18;5	5;0	7;2	3;0
N	alternative_acceptor	FMNL3	chr12	-	chr12:50047655-50047974	chr12:50047658-50047974		chr12:50047655-50047657	chr12:50047654-50047655		0;17	2;31	0;21	0;34	0;13	0;26	0;26	0;53
K	cassette	HDAC7	chr12	-	chr12:48189551-48189989	chr12:48189551-48189688;chr12:48189800-48189989		chr12:48189689-48189799			0;4	2;8	5;3	5;3	5;4	3;3	8;5	3;9
K	intron_retention	PXN	chr12	-	chr12:120653221-120659425				chr12:120653220-120653221;chr12:120659425-120659426		0;2	0;2	8;0	3;2	8;3	0;0	6;0	5;0
K	jcn_only_AA	EMP1	chr12	+	chr12:13349807-13366412	chr12:13349807-13364402					2;48	0;14	0;84	0;288	0;105	0;105	5;157	0;111
N	intron_retention		chr12	+	chr12:54757652-54758235				chr12:54757651-54757652;chr12:54758235-54758236		0;0	0;16	2;14	0;6	0;7	5;14	0;3	0;50
K	alternative_acceptor	UBE3B	chr12	+	chr12:109927810-109928849	chr12:109927810-109928294		chr12:109928295-109928849	chr12:109928849-109928850		15;0	8;0	18;1	9;0	13;0	11;0	15;0	18;1
K	intron_retention	GAPDH	chr12	+	chr12:6647163-6647266				chr12:6647162-6647163;chr12:6647266-6647267		1450;0	2668;2	2302;0	1488;0	5448;3	3843;5	3718;0	4105;2
K	intron_retention	PIP4K2C	chr12	+	chr12:57987883-57988939				chr12:57987882-57987883;chr12:57988939-57988940		0;7	0;4	7;9	8;15	0;9	3;10	0;6	0;14
K	intron_retention	ARHGDIB	chr12	-	chr12:15097774-15100806				chr12:15097773-15097774;chr12:15100806-15100807		400;2	49;0	1263;5	180;0	1202;0	180;0	1092;0	230;0
K	alternative_donor	PUS7L	chr12	-	chr12:44149065-44152088;chr12:44149065-44152532	chr12:44149065-44152503		chr12:44152089-44152503;chr12:44152504-44152532	chr12:44152503-44152504;chr12:44152532-44152533		0;0	0;0	2;0	1;1	5;0	0;0	3;0	4;1
K	cassette	STRAP	chr12	+	chr12:16035754-16042861	chr12:16035754-16036474;chr12:16036611-16042861		chr12:16036475-16036610			0;36	0;20	6;65	0;28	0;77	0;30	0;105	0;57
K	intron_retention		chr12	+	chr12:113405980-113407412				chr12:113405979-113405980;chr12:113407412-113407413		11;0	192;3	19;0	535;15	35;0	541;13	41;0	630;14
N	jcn_only_AD	FAM60A	chr12	-	chr12:31451159-31457915;chr12:31451159-31478957	chr12:31451159-31457919		chr12:31457916-31457919;chr12:31457920-31478957	chr12:31457919-31457920;chr12:31478957-31478958		0;0	10;3	7;2	22;0	7;0	14;5	8;2	15;6
K	intron_retention	CD163	chr12	-	chr12:7636272-7637691				chr12:7636271-7636272;chr12:7637691-7637692		523;0	805;2	920;0	434;0	1394;2	1775;0	984;0	1975;5
K	jcn_only_AD	SMARCC2	chr12	-	chr12:56557550-56558431	chr12:56557550-56558086		chr12:56558087-56558431	chr12:56558431-56558432		0;11	0;7	0;33	0;23	0;32	0;20	0;28	2;22
K	jcn_only_AA	DDX11	chr12	+	chr12:31254065-31255176	chr12:31254065-31254766					0;0	2;0	0;3	0;3	3;20	0;5	0;9	0;2
K	intron_retention	TMEM198B	chr12	+	chr12:56224868-56225040				chr12:56224867-56224868;chr12:56225040-56225041		6;2	0;0	0;0	2;0	2;2	2;0	0;4	0;2
K	intron_retention	CYP27B1	chr12	-	chr12:58159283-58159789				chr12:58159282-58159283;chr12:58159789-58159790		2;0	58;0	2;0	228;11	0;0	209;2	0;0	295;9
K	intron_retention	PCBP2	chr12	+	chr12:53861628-53862563				chr12:53861627-53861628;chr12:53862563-53862564		38;3	23;5	44;7	20;5	60;9	11;6	47;6	28;5
K	intron_retention	RECQL	chr12	-	chr12:21623281-21623902				chr12:21623280-21623281;chr12:21623902-21623903		15;0	8;0	39;3	26;3	43;0	16;4	52;5	33;0
N	alternative_donor	CD4	chr12	+	chr12:6923467-6923924;chr12:6923630-6923924	chr12:6923445-6923924		chr12:6923445-6923466;chr12:6923467-6923629	chr12:6923444-6923445;chr12:6923466-6923467		145;3	23;0	126;0	56;0	256;3	78;0	229;0	126;0
K	intron_retention		chr12	-	chr12:56742589-56742707				chr12:56742588-56742589;chr12:56742707-56742708		41;0	92;0	53;2	299;23	47;0	300;10	41;0	338;6
K	intron_retention	ISCU	chr12	+	chr12:108961045-108962606				chr12:108961044-108961045;chr12:108962606-108962607		69;0	63;0	148;0	101;2	102;3	98;2	98;0	92;2
K	jcn_only_AA	ZNF664	chr12	+	chr12:124458568-124472592	chr12:124458568-124472589		chr12:124472590-124472592	chr12:124472592-124472593		2;9	2;5	17;24	9;11	10;18	0;11	9;20	6;19
K	cassette	PTPRO	chr12	+	chr12:15710458-15718526	chr12:15710458-15713126;chr12:15713211-15718526		chr12:15713127-15713210			18;4	10;0	44;3	33;3	45;4	33;1	63;3	22;3
K	intron_retention	ANKLE2	chr12	-	chr12:133313652-133318004				chr12:133313651-133313652;chr12:133318004-133318005		7;2	18;0	23;0	50;7	19;0	43;2	23;0	50;5
K	cassette	STAT6	chr12	-	chr12:57502083-57504911	chr12:57502083-57503825;chr12:57503894-57504911		chr12:57503826-57503893			25;2	15;0	35;5	60;12	57;2	40;7	39;5	73;6
K	alternative_first_exon	STAT6	chr12	-	chr12:57502083-57504892	chr12:57502083-57503859,chr12:57502083-57503825,chr12:57502083-57503723	chr12:57504893-57505157	chr12:57503860-57503893			26;4	22;0	26;7	48;11	44;3	33;0	33;0	50;7
N	alternative_donor		chr12	-	chr12:31451159-31457915;chr12:31451159-31457919	chr12:31451159-31478957		chr12:31457916-31457919;chr12:31457920-31478957	chr12:31457919-31457920;chr12:31478957-31478958		0;0	0;7	0;5	1;15	0;5	0;10	0;6	1;8
N	jcn_only_AA	SDS	chr12	-	chr12:113836957-113837360	chr12:113837033-113837360		chr12:113836957-113837032	chr12:113836956-113836957		86;0	40;0	94;0	148;0	83;0	167;2	93;0	195;0
N	alternative_first_exon		chr12	-	chr12:48491908-48499810	chr12:48491908-48495251	chr12:48499811-48500091	chr12:48495252-48495299			0;4	1;5	0;2	0;10	0;3	0;2	1;10	0;7
N	cassette	APPL2	chr12	-	chr12:105591732-105597480	chr12:105591732-105593150;chr12:105593310-105597480		chr12:105593151-105593309			0;30	0;5	0;33	0;3	2;56	0;2	0;48	0;3
K	intron_retention	OAS1	chr12	+	chr12:113346630-113348902				chr12:113346629-113346630;chr12:113348902-113348903		0;11	0;73	0;15	99;364	0;17	0;264	0;19	85;388
K	intron_retention	PRPF40B	chr12	+	chr12:50036459-50036712				chr12:50036458-50036459;chr12:50036712-50036713		0;3	0;8	2;11	0;10	0;9	0;11	0;10	5;13
N	cassette	RBMS2	chr12	+	chr12:56982159-56982923	chr12:56982159-56982715;chr12:56982803-56982923		chr12:56982716-56982802			0;4	0;7	0;8	3;47	0;7	0;36	0;3	0;37
K	intron_retention	PRPF40B	chr12	+	chr12:50035808-50036017				chr12:50035807-50035808;chr12:50036017-50036018		0;8	2;6	2;5	0;10	3;7	0;7	2;7	0;13
K	intron_retention	FGFR1OP2	chr12	+	chr12:27110677-27113447				chr12:27110676-27110677;chr12:27113447-27113448		18;0	16;2	60;0	25;3	41;0	42;0	66;2	26;2
K	cassette	MVK	chr12	+	chr12:110017752-110023826	chr12:110017752-110019199;chr12:110019356-110023826		chr12:110019200-110019355			0;5	0;5	0;10	0;5	0;17	0;6	0;14	2;12
K	alternative_donor	CORO1C,PUS7L	chr12	-	chr12:44149065-44152532;chr12:44149065-44152503	chr12:44149065-44152088		chr12:44152089-44152503;chr12:44152504-44152532	chr12:44152503-44152504;chr12:44152532-44152533		0;0	0;0	2;0	1;1	5;0	0;0	3;0	4;1
K	alternative_donor	COPS7A	chr12	+	chr12:6833417-6833779;chr12:6833346-6833779	chr12:6833319-6833779		chr12:6833319-6833345;chr12:6833346-6833416	chr12:6833318-6833319;chr12:6833345-6833346		6;5	3;0	16;2	10;9	11;8	4;8	16;7	8;2
K	cassette	C2CD5	chr12	-	chr12:22610096-22622642	chr12:22610096-22612425;chr12:22612477-22622642		chr12:22612426-22612476			18;1	2;0	20;0	11;0	38;2	9;2	31;1	8;0
K	alternative_donor	DNAJC14	chr12	-	chr12:56222499-56223272	chr12:56222499-56222924		chr12:56222925-56223272	chr12:56223272-56223273		0;0	6;1	9;1	26;2	10;1	14;2	9;1	13;1
K	cassette	CLEC2D	chr12	+	chr12:9845528-9847355	chr12:9845528-9845629;chr12:9845712-9847355		chr12:9845630-9845711			0;5	0;3	10;12	16;12	2;3	5;1	5;4	14;12
N	coord_cassette	LETMD1	chr12	+	chr12:51442969-51450132	chr12:51442969-51449617;chr12:51449805-51449926;chr12:51450029-51450132		chr12:51449618-51449804;chr12:51449927-51450028			0;4	7;3	2;5	2;2	0;7	0;2	8;7	0;5
K	intron_retention	SCAF11	chr12	-	chr12:46316366-46316766				chr12:46316365-46316366;chr12:46316766-46316767		2;19	0;7	2;22	0;21	0;26	0;24	0;23	2;20
K	alternative_donor	CPM	chr12	-	chr12:69326621-69326939	chr12:69326621-69326921		chr12:69326922-69326939	chr12:69326939-69326940		3;15	0;20	6;17	0;19	0;13	0;23	5;21	3;46
K	alternative_donor	OS9	chr12	+	chr12:58112160-58112775	chr12:58112205-58112775		chr12:58112160-58112204	chr12:58112159-58112160		13;120	13;108	16;172	17;234	44;211	40;220	41;207	27;226
N	alternative_acceptor	ANKLE2	chr12	-	chr12:133311083-133311991	chr12:133311162-133311991		chr12:133311083-133311161	chr12:133311082-133311083		0;14	0;23	0;26	7;52	0;31	0;35	0;25	0;48
K	intron_retention	PPP1CC	chr12	-	chr12:111158010-111158909				chr12:111158009-111158010;chr12:111158909-111158910		3;52	0;21	6;64	0;24	10;88	0;18	9;93	2;32
N	jcn_only_AA	DDX11	chr12	+	chr12:133294385-133294575	chr12:133294385-133294572		chr12:133294573-133294575	chr12:133294575-133294576		0;3	0;3	2;15	3;5	6;17	0;3	8;15	0;6
K	intron_retention	SLC11A2	chr12	-	chr12:51399461-51402258				chr12:51399460-51399461;chr12:51402258-51402259		0;5	0;6	0;6	2;16	0;7	0;7	0;4	5;13
K	cassette	BAZ2A	chr12	-	chr12:57011317-57029965	chr12:57011317-57024559;chr12:57024650-57029965		chr12:57024560-57024649			0;2	0;1	2;1	11;10	3;4	5;8	5;1	7;7
K	jcn_only_AA	PTPN6	chr12	+	chr12:7060895-7061145	chr12:7060895-7061074		chr12:7061075-7061145	chr12:7061145-7061146		89;0	20;0	122;2	48;0	106;0	36;0	134;0	61;0
K	cassette	WNK1	chr12	+	chr12:971437-987377;chr12:971437-987380	chr12:971437-980430;chr12:980515-987377,chr12:980515-987380		chr12:980431-980514			8;22	0;19	14;34	6;20	45;40	0;16	24;37	14;43
K	alternative_first_exon	CD163	chr12	-	chr12:7655161-7656240	chr12:7655161-7655312	chr12:7656241-7656489	chr12:7655313-7655333			292;0	445;0	457;0	253;5	608;0	761;0	446;0	931;0
N	intron_retention		chr12	-	chr12:51380970-51382164				chr12:51380969-51380970;chr12:51382164-51382165		0;19	0;18	0;51	0;99	0;41	0;47	3;41	0;53
N	jcn_only_AD	ANKLE2,RASAL1	chr12	-	chr12:133331720-133338203	chr12:133331720-133333219		chr12:133333220-133338203	chr12:133338203-133338204		0;0	5;0	8;0	33;10	14;0	13;0	11;0	18;0
N	intron_retention		chr12	-	chr12:56742844-56743209				chr12:56742843-56742844;chr12:56743209-56743210		0;0	0;5	0;3	0;34	0;0	0;15	0;2	5;24
K	intron_retention	OAS1	chr12	+	chr12:113355506-113356401				chr12:113355505-113355506;chr12:113356401-113356402		0;10	16;80	0;10	69;330	0;18	65;226	0;16	58;292
K	intron_retention	P2RX4	chr12	+	chr12:121670311-121670413				chr12:121670310-121670311;chr12:121670413-121670414		24;0	23;0	66;2	319;3	74;0	118;0	64;0	113;2
K	intron_retention	STAT6	chr12	-	chr12:57492686-57492797				chr12:57492685-57492686;chr12:57492797-57492798		76;0	55;0	82;0	139;5	105;0	122;0	101;2	152;0
N	intron_retention		chr12	-	chr12:56742814-56742946				chr12:56742813-56742814;chr12:56742946-56742947		0;12	0;34	0;9	7;73	0;14	0;59	0;16	0;74
K	jcn_only_AD	COPS7A	chr12	+	chr12:6833417-6833779;chr12:6833346-6833779	chr12:6833319-6833779		chr12:6833319-6833345;chr12:6833346-6833416	chr12:6833318-6833319;chr12:6833345-6833346		9;5	8;0	28;2	26;9	17;8	8;8	31;7	20;2
N	alternative_donor	CLEC4E	chr12	-	chr12:8689863-8690226;chr12:8689863-8691812	chr12:8689863-8691737		chr12:8690227-8691737;chr12:8691738-8691812	chr12:8691737-8691738;chr12:8691812-8691813		2;0	49;3	11;0	321;6	5;0	194;16	2;0	338;12
N	alternative_acceptor	STX2	chr12	-	chr12:131289089-131291526;chr12:131286034-131291526	chr12:131289086-131291526		chr12:131286034-131289085;chr12:131289086-131289088	chr12:131286033-131286034;chr12:131289085-131289086		9;1	9;0	12;2	9;2	23;4	6;3	20;1	10;2
K	intron_retention	SCARB1	chr12	-	chr12:125263133-125267228				chr12:125263132-125263133;chr12:125267228-125267229		23;5	7;0	35;2	3;0	26;5	5;0	30;2	0;0
K	jcn_only_AA	OS9	chr12	+	chr12:58109754-58109874	chr12:58109754-58109871		chr12:58109872-58109874	chr12:58109874-58109875		78;34	43;32	181;56	244;103	188;64	191;81	144;59	208;84
K	alternative_acceptor	EIF4B,PRPF40B	chr12	+	chr12:50031608-50035711	chr12:50031608-50035690		chr12:50035691-50035711	chr12:50035711-50035712		0;6	2;4	0;7	0;5	0;2	0;3	0;3	0;4
K	cassette	TSFM	chr12	+	chr12:58180946-58189959	chr12:58180946-58186768;chr12:58186857-58189959		chr12:58186769-58186856			0;9	0;28	0;19	3;50	0;21	0;24	0;22	0;36
N	alternative_donor	ATXN2,CD163	chr12	-	chr12:111908547-111923074	chr12:111908547-111916873		chr12:111916874-111923074	chr12:111923074-111923075		5;0	2;0	11;0	0;0	9;0	3;0	3;0	14;0
K	intron_retention	COPS7A	chr12	+	chr12:6839987-6840165				chr12:6839986-6839987;chr12:6840165-6840166		19;2	17;2	43;0	16;0	53;4	19;0	56;4	26;2
K	alternative_first_exon	DDX11	chr12	+	chr12:31226904-31231323,chr12:31227026-31231323	chr12:31231223-31231323	chr12:31226794-31226903	chr12:31230879-31231222			0;0	0;0	3;0	4;0	7;0	4;0	8;1	3;0
K	jcn_only_AA	DDX54	chr12	-	chr12:113596915-113599074	chr12:113596918-113599074		chr12:113596915-113596917	chr12:113596914-113596915		7;6	3;8	19;15	11;9	19;22	6;2	11;15	6;11
K	intron_retention	PHLDA1	chr12	-	chr12:76423873-76424289				chr12:76423872-76423873;chr12:76424289-76424290		26;0	5;0	73;0	124;3	47;0	15;0	90;0	38;0
K	jcn_only_AA	RASSF8,TMPO	chr12	+	chr12:26148064-26208211	chr12:26148064-26208168		chr12:26208169-26208211	chr12:26208211-26208212		0;0	2;2	0;0	0;0	2;0	0;0	0;0	0;0
K	intron_retention	RPL41	chr12	+	chr12:56510444-56510558				chr12:56510443-56510444;chr12:56510558-56510559		1191;19	861;20	1228;24	470;14	1919;32	684;17	1768;27	969;24
K	jcn_only_AA	MMP19	chr12	-	chr12:56234992-56236136	chr12:56235021-56236136		chr12:56234992-56235020	chr12:56234991-56234992		3;31	2;16	0;28	11;210	0;27	5;52	0;49	7;123
N	jcn_only_AA	FBRSL1,VEZT	chr12	+	chr12:133147127-133147892	chr12:133147127-133147653		chr12:133147654-133147892	chr12:133147892-133147893		0;0	0;0	6;5	0;0	3;0	0;0	7;0	0;0
K	alternative_first_exon	SHMT2	chr12	+	chr12:57623595-57624585	chr12:57624028-57624585	chr12:57623110-57623594	chr12:57623869-57624027			6;0	3;0	13;3	3;0	16;6	2;0	23;4	4;0
K	alternative_donor	ACTR6	chr12	+	chr12:100599523-100601440	chr12:100599536-100601440		chr12:100599523-100599535	chr12:100599522-100599523		0;0	9;0	10;0	5;0	13;1	15;1	13;0	11;0
N	jcn_only_AD	RPL6	chr12	-	chr12:112846461-112847390;chr12:112846461-112847214	chr12:112846461-112846853		chr12:112846854-112847214;chr12:112847215-112847390	chr12:112847214-112847215;chr12:112847390-112847391		25;2	10;0	67;0	34;2	84;0	20;0	74;5	50;0
K	cassette	EP400	chr12	+	chr12:132464339-132466637	chr12:132464339-132466033;chr12:132466142-132466637		chr12:132466034-132466141			0;1	0;1	0;1	0;1	0;2	0;0	0;1	2;2
K	intron_retention	TM7SF3	chr12	-	chr12:27129291-27132716				chr12:27129290-27129291;chr12:27132716-27132717		39;2	11;0	55;0	34;0	93;3	23;0	86;0	22;0
N	alternative_donor	ATF7,SLC11A2	chr12	-	chr12:51375587-51382164	chr12:51375587-51382082		chr12:51382083-51382164	chr12:51382164-51382165		9;16	27;10	28;38	41;63	19;29	36;36	18;30	51;40
N	cassette	NCOR2	chr12	-	chr12:124838743-124839382	chr12:124838743-124839023;chr12:124839129-124839382		chr12:124839024-124839128			0;30	0;15	0;44	2;25	0;58	0;13	0;46	0;13
K	alternative_acceptor	RPLP0	chr12	-	chr12:120638635-120638885	chr12:120638695-120638885		chr12:120638635-120638694	chr12:120638634-120638635		114;12	27;1	328;34	66;8	495;43	76;4	425;40	83;8
K	jcn_only_AD	FRS2	chr12	+	chr12:69925837-69955959	chr12:69931764-69955959					0;0	2;0	2;0	10;0	5;2	0;0	6;0	2;0
K	cassette	ERC1	chr12	+	chr12:1219514-1225031	chr12:1219514-1221380;chr12:1221474-1225031		chr12:1221381-1221473			0;4	0;4	3;4	2;7	2;10	0;3	2;6	2;9
K	intron_retention	KDM2B	chr12	-	chr12:121867967-121868144				chr12:121867966-121867967;chr12:121868144-121868145		0;19	0;11	0;26	2;14	0;31	0;10	5;31	0;16
K	jcn_only_AA	EIF4B,PRPF40B	chr12	+	chr12:50031608-50035711	chr12:50031608-50035690		chr12:50035691-50035711	chr12:50035711-50035712		0;5	2;0	0;0	0;0	0;0	0;0	0;0	0;0
K	intron_retention	RECQL	chr12	-	chr12:21654307-21654414				chr12:21654306-21654307;chr12:21654414-21654415		0;3	0;2	0;9	0;7	0;16	2;6	0;13	0;10
N	intron_retention		chr12	-	chr12:7585149-7585253				chr12:7585148-7585149;chr12:7585253-7585254		0;43	0;0	0;113	0;0	2;94	0;3	0;62	0;0
K	jcn_only_AD	TMEM106C	chr12	+	chr12:48357417-48357991	chr12:48357488-48357991		chr12:48357417-48357487	chr12:48357416-48357417		7;0	0;0	19;0	0;0	51;8	3;0	55;8	6;0
K	jcn_only_AD	RAP1B	chr12	+	chr12:69004824-69042478	chr12:69004833-69042478		chr12:69004824-69004832	chr12:69004823-69004824		42;3	48;17	91;33	151;67	110;42	91;53	113;43	105;43
K	cassette	LRMP	chr12	+	chr12:25205891-25216653	chr12:25205891-25215753;chr12:25215835-25216653		chr12:25215754-25215834			0;6	0;1	2;4	0;0	0;10	0;0	0;7	0;0
K	intron_retention	ZNF384	chr12	-	chr12:6787510-6788111				chr12:6787509-6787510;chr12:6788111-6788112		0;6	0;5	0;16	0;9	2;12	0;6	0;11	0;9
K	intron_retention	CD163	chr12	-	chr12:7632593-7635238				chr12:7632592-7632593;chr12:7635238-7635239		0;10	47;19	63;12	0;9	51;12	55;22	20;7	49;30
K	intron_retention	KIAA1033	chr12	+	chr12:105558519-105560641				chr12:105558518-105558519;chr12:105560641-105560642		47;0	56;0	68;0	100;0	74;0	99;0	77;0	117;4
K	intron_retention	DAZAP2	chr12	+	chr12:51634714-51634779				chr12:51634713-51634714;chr12:51634779-51634780		0;132	0;92	0;266	0;194	0;307	0;188	20;300	0;236
K	intron_retention	RAN	chr12	+	chr12:131357175-131357380				chr12:131357174-131357175;chr12:131357380-131357381		59;0	52;0	155;2	77;0	286;3	66;0	309;0	83;0
K	coord_cassette	PCBP2,RP11-793H13.8	chr12	+	chr12:53856352-53861004	chr12:53856352-53858543;chr12:53858637-53859715;chr12:53859758-53861004		chr12:53858544-53858636;chr12:53859716-53859757			16;172	8;79	23;155	0;101	0;224	0;95	17;202	10;130
N	jcn_only_AA	GNPTAB	chr12	-	chr12:102158995-102159868	chr12:102159083-102159868		chr12:102158995-102159082	chr12:102158994-102158995		0;31	0;42	2;53	0;85	0;49	0;47	0;66	0;57
N	jcn_only_AD	STAT2	chr12	-	chr12:56745235-56748249;chr12:56745235-56748242	chr12:56745235-56748202		chr12:56748203-56748242;chr12:56748243-56748249	chr12:56748242-56748243;chr12:56748249-56748250		30;0	49;0	45;0	216;13	36;0	191;0	33;0	223;0
K	intron_retention	PRPF40B	chr12	+	chr12:50037788-50037882				chr12:50037787-50037788;chr12:50037882-50037883		0;11	0;9	2;4	0;10	2;6	0;5	0;6	0;10
K	intron_retention	C1RL	chr12	-	chr12:7252623-7254493				chr12:7252622-7252623;chr12:7254493-7254494		0;0	14;0	0;0	15;2	0;0	26;2	0;0	28;0
K	intron_retention	GCN1	chr12	-	chr12:120606105-120607972				chr12:120606104-120606105;chr12:120607972-120607973		8;0	15;0	22;4	10;5	41;0	11;0	30;0	18;0
K	jcn_only_AD	RECQL	chr12	-	chr12:21654150-21654346;chr12:21654150-21654414	chr12:21654150-21654396		chr12:21654347-21654396;chr12:21654397-21654414	chr12:21654396-21654397;chr12:21654414-21654415		6;0	0;0	7;0	9;7	11;11	2;5	17;11	10;6
K	alternative_first_exon	GXYLT1,LPAR5	chr12	-	chr12:6730631-6745072	chr12:6730631-6740750	chr12:6745073-6745613	chr12:6740751-6740837			0;0	0;0	2;2	0;0	1;3	0;0	1;0	0;1
K	jcn_only_AD	ATP2B1,CHD4	chr12	-	chr12:90049885-90102995	chr12:90049885-90102372		chr12:90102373-90102995	chr12:90102995-90102996		0;0	0;5	13;0	0;16	0;0	5;0	0;3	0;0
K	jcn_only_AA	WNK1	chr12	+	chr12:980515-987380	chr12:980515-987377		chr12:987378-987380	chr12:987380-987381		11;18	2;8	13;18	6;8	14;26	6;8	14;20	18;26
K	intron_retention	CLEC2D	chr12	+	chr12:9845528-9847355				chr12:9845527-9845528;chr12:9847355-9847356		0;0	0;0	10;5	16;0	2;0	5;0	5;0	14;0
K	intron_retention	MARS	chr12	+	chr12:57910121-57910217				chr12:57910120-57910121;chr12:57910217-57910218		32;0	30;0	56;2	83;0	57;0	44;2	56;0	51;0
K	intron_retention	APPL2	chr12	-	chr12:105571041-105582050				chr12:105571040-105571041;chr12:105582050-105582051		39;0	0;0	36;0	5;0	50;4	1;0	60;0	2;0
K	intron_retention	P2RX4	chr12	+	chr12:121659970-121660532				chr12:121659969-121659970;chr12:121660532-121660533		0;0	0;0	0;0	3;5	0;0	0;0	0;0	0;0
N	cassette	LTBR	chr12	+	chr12:6497672-6499277	chr12:6497672-6497965;chr12:6497992-6499277		chr12:6497966-6497991			0;60	0;49	0;101	2;125	0;95	0;70	0;83	0;93
N	intron_retention		chr12	+	chr12:11982164-11992073				chr12:11982163-11982164;chr12:11992073-11992074		0;0	0;7	0;0	0;5	0;0	0;2	0;0	6;6
N	alternative_donor	TUBA1A	chr12	-	chr12:124979915-125051853	chr12:124979915-125020110		chr12:125020111-125051853	chr12:125051853-125051854		0;0	0;0	0;0	0;0	5;0	0;0	0;0	0;0
N	alternative_acceptor		chr12	+	chr12:6646557-6646782	chr12:6646557-6646749		chr12:6646750-6646782	chr12:6646782-6646783		0;815	0;1446	2;1261	0;848	0;3178	0;2229	0;2207	0;2707
K	alternative_acceptor	KIAA1033	chr12	+	chr12:105514376-105514878	chr12:105514376-105514866		chr12:105514867-105514878	chr12:105514878-105514879		41;0	41;0	56;0	105;0	63;2	73;2	57;0	119;3
K	intron_retention	MMP19	chr12	-	chr12:56231159-56231338				chr12:56231158-56231159;chr12:56231338-56231339		50;0	33;0	68;0	388;2	55;0	100;0	95;0	218;5
K	alternative_first_exon	PXN,PYM1	chr12	-	chr12:56297265-56308059;chr12:56297265-56320859	chr12:56297265-56321508	chr12:56308060-56308150;chr12:56320860-56321051	chr12:56321509-56321697			2;9	2;8	3;18	7;12	4;19	3;15	7;19	2;22
K	intron_retention	TRPV4	chr12	-	chr12:110252421-110252522				chr12:110252420-110252421;chr12:110252522-110252523		0;0	0;0	3;15	0;0	0;14	0;0	0;7	0;0
K	intron_retention	MYL6	chr12	+	chr12:56553407-56553758				chr12:56553406-56553407;chr12:56553758-56553759		0;181	0;138	10;491	0;487	0;689	0;439	0;605	17;565
N	alternative_acceptor		chr12	+	chr12:65264589-65268852	chr12:65264589-65268780		chr12:65268781-65268852	chr12:65268852-65268853		0;0	2;1	0;2	0;0	0;1	0;1	0;1	0;3
N	jcn_only_AD	CLEC2D	chr12	+	chr12:9822392-9833518;chr12:9820868-9833518;chr12:9809753-9833518	chr12:9821392-9833518		chr12:9809753-9820867;chr12:9820868-9821391;chr12:9821392-9822391	chr12:9809752-9809753;chr12:9820867-9820868;chr12:9821391-9821392		5;0	3;0	14;0	15;2	0;0	0;0	0;0	14;0
N	jcn_only_AD		chr12	-	chr12:133390006-133393245	chr12:133390006-133393125		chr12:133393126-133393245	chr12:133393245-133393246		0;2	0;0	0;14	0;2	0;7	0;0	9;13	8;8
K	intron_retention	PPP1R12A	chr12	-	chr12:80200114-80201005				chr12:80200113-80200114;chr12:80201005-80201006		10;2	16;0	14;0	10;0	14;0	15;0	11;0	10;2
K	alternative_last_exon	FGFR1OP2,USP15	chr12	+	chr12:27110677-27116274	chr12:27110677-27113447	chr12:27116275-27116388	chr12:27113448-27113779			1;24	9;16	11;41	9;25	14;38	12;27	9;39	13;20
K	alternative_acceptor	PCBP2	chr12	+	chr12:53865592-53873189	chr12:53865592-53868652		chr12:53868653-53873189	chr12:53873189-53873190		282;1	153;1	302;1	240;1	475;1	167;1	374;1	266;1
K	intron_retention	COPS7A	chr12	+	chr12:6833346-6833779				chr12:6833345-6833346;chr12:6833779-6833780		9;0	6;0	25;2	17;0	17;2	8;0	23;6	15;0
K	cassette	RP11-705C15.2	chr12	+	chr12:9808576-9809516	chr12:9808576-9809163;chr12:9809246-9809516		chr12:9809164-9809245			5;3	2;0	9;3	22;8	3;5	0;4	19;6	19;5
K	intron_retention	GLIPR1	chr12	+	chr12:75889443-75892473				chr12:75889442-75889443;chr12:75892473-75892474		115;2	9;3	97;3	9;0	143;3	6;2	159;3	16;2
K	intron_retention	MMP19	chr12	-	chr12:56231467-56231626				chr12:56231466-56231467;chr12:56231626-56231627		48;0	39;0	51;0	313;6	60;0	82;0	89;0	215;3
N	jcn_only_AD	TBK1	chr12	+	chr12:64889556-64890146	chr12:64889870-64890146		chr12:64889556-64889869	chr12:64889555-64889556		18;0	28;0	18;0	80;8	28;0	75;0	15;0	74;0
K	jcn_only_AD	SLC41A2	chr12	-	chr12:105322473-105351967	chr12:105322473-105351865					0;2	0;16	2;10	8;41	0;0	0;15	0;0	6;27
K	intron_retention	CLEC7A	chr12	-	chr12:10279308-10279638				chr12:10279307-10279308;chr12:10279638-10279639		0;17	0;0	0;9	0;3	8;10	0;2	0;10	0;0
K	intron_retention	OS9	chr12	+	chr12:58112966-58113881				chr12:58112965-58112966;chr12:58113881-58113882		161;3	107;3	203;3	272;4	218;2	239;5	214;5	294;2
K	cassette	P2RX7	chr12	+	chr12:121593951-121600226	chr12:121593951-121598704;chr12:121598778-121600226		chr12:121598705-121598777			0;13	2;18	0;17	0;71	0;16	0;8	0;17	0;9
N	alternative_acceptor	SLC11A2	chr12	-	chr12:51375587-51382164	chr12:51380970-51382164		chr12:51375587-51380969	chr12:51375586-51375587		9;7	27;9	28;18	41;33	19;13	36;15	18;13	51;19
K	intron_retention	CLEC7A	chr12	-	chr12:10279308-10280345				chr12:10279307-10279308;chr12:10280345-10280346		7;20	0;0	11;11	9;6	6;21	3;3	10;13	0;2
K	alternative_acceptor	USP15	chr12	+	chr12:62696702-62708570	chr12:62696702-62698453		chr12:62698454-62708570	chr12:62708570-62708571		27;1	51;1	31;1	115;2	47;1	111;2	32;1	134;2
N	jcn_only_AD	OAS3	chr12	+	chr12:113405980-113407412	chr12:113405986-113407412		chr12:113405980-113405985	chr12:113405979-113405980		11;0	192;9	19;0	535;28	35;0	541;22	41;0	630;44
N	jcn_only_AA	CD163	chr12	-	chr12:7635326-7635561	chr12:7635359-7635561		chr12:7635326-7635358	chr12:7635325-7635326		0;602	0;883	2;1005	0;547	0;1349	0;1695	0;981	0;2167
K	jcn_only_AD	TXNRD1	chr12	+	chr12:104680888-104682708;chr12:104681210-104682708	chr12:104681125-104682708		chr12:104680888-104681124;chr12:104681125-104681209	chr12:104680887-104680888;chr12:104681124-104681125		17;15	15;9	77;41	72;50	39;17	23;10	51;20	42;16
K	cassette	NCOR2	chr12	-	chr12:124810917-124815390	chr12:124810917-124811954;chr12:124812180-124815390		chr12:124811955-124812179			0;18	0;8	0;37	0;18	0;40	0;9	17;36	0;11
N	jcn_only_AD	RPL6	chr12	-	chr12:112846461-112846853;chr12:112846461-112847214	chr12:112846461-112847390		chr12:112846854-112847214;chr12:112847215-112847390	chr12:112847214-112847215;chr12:112847390-112847391		5;23	2;8	11;56	11;25	7;77	6;15	10;68	8;42
K	cassette	WNK1	chr12	+	chr12:987528-990857	chr12:987528-989886;chr12:990166-990857		chr12:989887-990165			20;6	27;9	31;12	30;4	67;12	33;8	63;14	41;12
K	intron_retention	MMP19	chr12	-	chr12:56234992-56236136				chr12:56234991-56234992;chr12:56236136-56236137		3;19	2;7	0;19	11;95	0;14	5;20	0;29	7;55
K	alternative_acceptor	ARNTL2	chr12	+	chr12:27529321-27533179	chr12:27529321-27530373		chr12:27530374-27533179	chr12:27533179-27533180		0;0	0;1	0;0	2;2	0;0	0;1	0;0	6;1
N	jcn_only_AA	EEA1	chr12	-	chr12:93213288-93219941	chr12:93214893-93219941		chr12:93213288-93214892	chr12:93213287-93213288		7;0	2;0	11;0	6;0	9;0	3;2	9;2	2;0
K	jcn_only_AA	TCTN2	chr12	+	chr12:124156680-124158164	chr12:124156680-124158161		chr12:124158162-124158164	chr12:124158164-124158165		3;0	0;0	0;0	0;0	0;6	0;0	2;0	0;2
K	jcn_only_AA	MYL6,P2RX7	chr12	+	chr12:121598778-121600226	chr12:121598778-121600073		chr12:121600074-121600226	chr12:121600226-121600227		11;0	16;0	26;0	85;2	15;0	10;0	14;0	10;0
K	cassette	USP15	chr12	+	chr12:62719715-62749111	chr12:62719715-62743001;chr12:62743089-62749111		chr12:62743002-62743088			2;13	8;22	0;17	32;51	7;20	19;40	10;14	20;54
K	jcn_only_AA	RASAL1	chr12	-	chr12:113543689-113544901	chr12:113543692-113544901		chr12:113543689-113543691	chr12:113543688-113543689		0;0	0;0	0;6	0;0	2;2	0;0	0;0	0;0
K	jcn_only_AA	KIAA1033	chr12	+	chr12:105514376-105514878	chr12:105514376-105514866		chr12:105514867-105514878	chr12:105514878-105514879		41;0	41;0	56;0	105;0	63;5	73;3	57;0	119;7
K	intron_retention	ITFG2	chr12	+	chr12:2967498-2968699				chr12:2967497-2967498;chr12:2968699-2968700		3;2	0;0	3;2	0;0	2;27	0;0	3;29	0;0
K	intron_retention	HNRNPA1	chr12	+	chr12:54678102-54678332				chr12:54678101-54678102;chr12:54678332-54678333		209;6	238;7	443;6	195;3	636;9	175;0	655;11	235;2
K	jcn_only_AA	STK38L,UBE3B	chr12	+	chr12:27450788-27455069	chr12:27450788-27453486					13;0	9;0	8;0	8;0	14;2	7;0	26;0	11;0
N	jcn_only_AA	CD63	chr12	-	chr12:56120544-56120673	chr12:56120580-56120673		chr12:56120544-56120579	chr12:56120543-56120544		0;1041	0;770	0;1530	0;1322	3;2299	0;1457	0;1957	0;1431
K	intron_retention	IRAK4	chr12	+	chr12:44162076-44165982				chr12:44162075-44162076;chr12:44165982-44165983		2;2	5;0	0;2	3;2	8;0	8;2	0;0	8;0
K	alternative_last_exon	IGF1	chr12	-	chr12:102796345-102813286	chr12:102811782-102813286	chr12:102789645-102796344	chr12:102811269-102811781			53;19	0;0	15;6	5;2	33;13	3;1	41;14	6;4
K	alternative_acceptor	SLC11A2	chr12	-	chr12:51402328-51404477	chr12:51402408-51404477		chr12:51402328-51402407	chr12:51402327-51402328		0;17	0;26	0;44	0;77	2;33	0;41	0;34	0;71
K	cassette	RNF10	chr12	+	chr12:121004784-121013433	chr12:121004784-121008993;chr12:121009095-121013433		chr12:121008994-121009094			0;37	0;37	0;60	7;65	0;73	0;54	3;62	6;63
K	alternative_donor	CSRNP2	chr12	-	chr12:51470431-51477121	chr12:51470431-51477011		chr12:51477012-51477121	chr12:51477121-51477122		2;0	6;0	0;0	3;2	2;0	10;1	6;0	10;0
K	alternative_donor	RASAL1	chr12	-	chr12:113539815-113541750	chr12:113539815-113540740		chr12:113540741-113541750	chr12:113541750-113541751		0;0	0;0	2;1	0;0	0;0	0;0	0;1	0;0
K	intron_retention	PRR13	chr12	+	chr12:53836518-53837174				chr12:53836517-53836518;chr12:53837174-53837175		69;2	72;2	132;0	192;0	142;2	180;2	177;2	232;4
K	alternative_acceptor	IFFO1	chr12	-	chr12:6657324-6657590	chr12:6657327-6657590		chr12:6657324-6657326	chr12:6657323-6657324		8;17	2;5	9;28	2;10	14;21	3;7	8;18	5;7
K	cassette	CMKLR1	chr12	-	chr12:108687442-108732803	chr12:108687442-108723771;chr12:108723985-108732803		chr12:108723772-108723984			28;54	17;48	41;115	60;155	40;94	53;150	30;78	75;169
K	jcn_only_AD	CHD4	chr12	-	chr12:6688084-6690209	chr12:6688084-6690203		chr12:6690204-6690209	chr12:6690209-6690210		55;2	53;0	77;3	34;0	100;11	49;5	92;7	73;0
N	intron_retention		chr12	-	chr12:113355513-113356408				chr12:113355512-113355513;chr12:113356408-113356409		0;10	0;74	0;12	0;320	6;16	0;214	0;15	0;297
K	jcn_only_AA	NUDT4	chr12	+	chr12:93789310-93792546	chr12:93789310-93792543		chr12:93792544-93792546	chr12:93792546-93792547		16;15	15;22	20;16	13;10	30;24	10;16	15;13	5;16
K	jcn_only_AD	TESC	chr12	-	chr12:117484472-117484581	chr12:117484472-117484576		chr12:117484577-117484581	chr12:117484581-117484582		9;3	0;0	5;0	0;0	3;2	0;0	7;0	0;0
K	jcn_only_AD	FGFR1OP2	chr12	+	chr12:27110677-27116274	chr12:27113562-27116274					0;10	6;3	13;17	8;9	14;17	9;7	9;17	11;13
K	intron_retention	RP11-793H13.3	chr12	+	chr12:53907836-53908136				chr12:53907835-53907836;chr12:53908136-53908137		0;7	0;7	0;15	0;20	0;18	0;13	2;15	0;18
K	jcn_only_AA	RECQL	chr12	-	chr12:21654150-21654396	chr12:21654307-21654396		chr12:21654150-21654306	chr12:21654149-21654150		0;0	0;0	0;3	7;6	11;8	5;6	11;9	6;5
K	intron_retention	GPR84	chr12	-	chr12:54757644-54758176				chr12:54757643-54757644;chr12:54758176-54758177		0;0	30;15	30;4	22;2	18;0	30;5	17;0	58;12
K	alternative_first_exon	TESPA1	chr12	-	chr12:55368392-55378368	chr12:55368392-55375557	chr12:55378369-55378456	chr12:55375558-55375729			0;0	1;0	2;2	0;0	2;0	0;0	0;0	1;0
N	jcn_only_AA	SLC2A13	chr12	-	chr12:40224031-40258563	chr12:40224283-40258563		chr12:40224031-40224282	chr12:40224030-40224031		0;0	2;2	3;0	0;0	10;0	7;0	7;0	2;0
K	alternative_donor	STAT6	chr12	-	chr12:57502083-57503825;chr12:57502083-57503723	chr12:57502083-57503859		chr12:57503724-57503825;chr12:57503826-57503859	chr12:57503825-57503826;chr12:57503859-57503860		3;0	0;0	9;0	16;0	5;5	0;0	0;0	10;2
K	cassette	GLIPR1	chr12	+	chr12:75875860-75884185	chr12:75875860-75881518;chr12:75881590-75884185		chr12:75881519-75881589			209;1	31;0	158;1	20;0	331;4	24;0	402;8	43;1
K	jcn_only_AA	LRP1,PRR13	chr12	+	chr12:53836518-53837324	chr12:53836518-53837174		chr12:53837175-53837324	chr12:53837324-53837325		0;69	3;72	7;132	5;192	11;142	2;180	7;177	19;232
K	cassette	CACNA2D4	chr12	-	chr12:1910285-1919443	chr12:1910285-1910739;chr12:1910811-1919443		chr12:1910740-1910810			0;3	0;1	0;8	0;4	0;11	0;3	14;15	0;6
K	alternative_first_exon	SNRNP35	chr12	+	chr12:123942764-123950084	chr12:123944448-123950084	chr12:123942188-123942763	chr12:123944070-123944447			1;1	2;0	2;1	6;2	3;2	4;1	4;2	5;1
N	intron_retention		chr12	+	chr12:113405986-113407412				chr12:113405985-113405986;chr12:113407412-113407413		0;0	9;2	0;0	28;13	0;0	22;9	0;0	44;14
K	jcn_only_AA	CCDC91,OAS3	chr12	+	chr12:28343575-28410134	chr12:28343575-28378727					0;0	0;0	0;0	0;0	7;0	6;0	3;0	0;2
K	intron_retention	RPLP0	chr12	-	chr12:120635266-120636356				chr12:120635265-120635266;chr12:120636356-120636357		405;0	186;0	811;7	143;0	1186;2	161;0	973;3	157;0
K	jcn_only_AD	PEX5	chr12	+	chr12:7342347-7342957	chr12:7342813-7342957		chr12:7342347-7342812	chr12:7342346-7342347		5;0	2;0	2;0	0;0	6;3	5;0	0;2	3;0
K	intron_retention	RECQL	chr12	-	chr12:21654307-21654396				chr12:21654306-21654307;chr12:21654396-21654397		0;3	0;2	3;10	6;6	8;18	6;6	9;15	5;10
K	alternative_donor	ATP2B1,CHD4	chr12	-	chr12:90049885-90102995	chr12:90049885-90102372		chr12:90102373-90102995	chr12:90102995-90102996		0;3	0;3	13;2	0;9	0;2	5;6	0;1	0;8
K	intron_retention	HNRNPA1	chr12	+	chr12:54680517-54680736				chr12:54680516-54680517;chr12:54680736-54680737		11;0	0;0	0;0	0;0	14;2	0;0	0;4	0;0
K	intron_retention	MYL6	chr12	+	chr12:56553515-56553758				chr12:56553514-56553515;chr12:56553758-56553759		607;0	448;0	1384;0	1403;0	2023;2	1297;2	1743;0	1627;0
N	intron_retention		chr12	+	chr12:64889870-64890146				chr12:64889869-64889870;chr12:64890146-64890147		0;0	0;0	0;0	8;4	0;0	0;2	0;0	0;2
K	alternative_acceptor	WNK1	chr12	+	chr12:980515-987380	chr12:980515-987377		chr12:987378-987380	chr12:987380-987381		11;9	2;4	13;9	6;4	14;13	6;4	14;10	18;13
K	intron_retention	DRAM1	chr12	+	chr12:102302142-102307951				chr12:102302141-102302142;chr12:102307951-102307952		35;0	189;5	130;0	447;7	165;0	410;2	123;0	457;4
K	cassette	FOXM1	chr12	-	chr12:2973919-2975558	chr12:2973919-2974520;chr12:2974566-2975558		chr12:2974521-2974565			0;1	0;0	0;1	0;0	11;14	0;0	16;11	0;1
N	alternative_donor	CHPT1	chr12	+	chr12:102120183-102122678	chr12:102120276-102122678		chr12:102120183-102120275	chr12:102120182-102120183		14;6	2;1	23;7	11;3	44;9	9;2	53;11	19;5
K	jcn_only_AD	IGF1,SMUG1	chr12	-	chr12:54582381-54582734	chr12:54582381-54582509		chr12:54582510-54582734	chr12:54582734-54582735		2;0	0;0	0;0	0;0	0;0	0;0	2;2	0;0
K	intron_retention	OS9	chr12	+	chr12:58109754-58109871				chr12:58109753-58109754;chr12:58109871-58109872		34;0	32;0	56;4	103;0	64;6	81;5	59;2	84;6
K	intron_retention	PRR13	chr12	+	chr12:53836518-53837324				chr12:53836517-53836518;chr12:53837324-53837325		0;38	3;48	7;76	5;111	11;80	2;76	7;65	19;99
N	cassette	SENP1	chr12	-	chr12:48459464-48465449	chr12:48459464-48460709;chr12:48460749-48465449		chr12:48460710-48460748			0;4	0;4	0;6	0;12	0;10	2;5	0;4	0;11
N	jcn_only_AD	KIAA1033	chr12	+	chr12:105516017-105519781	chr12:105516025-105519781		chr12:105516017-105516024	chr12:105516016-105516017		35;0	45;2	53;0	76;0	58;0	84;0	69;0	107;0
N	alternative_donor	CLIP1,NCKAP5L	chr12	-	chr12:50185835-50186228	chr12:50185835-50186149		chr12:50186150-50186228	chr12:50186228-50186229		5;0	0;0	19;0	8;2	17;5	2;0	22;3	14;0
K	jcn_only_AA	SUOX	chr12	+	chr12:56391124-56395995	chr12:56391124-56391398					0;2	0;0	0;5	0;2	2;2	0;5	2;3	0;3
K	intron_retention	PHB2	chr12	-	chr12:7076402-7077054				chr12:7076401-7076402;chr12:7077054-7077055		0;5	0;3	2;8	0;5	3;10	0;2	2;10	0;7
K	jcn_only_AA	RASAL1	chr12	-	chr12:113542020-113543518	chr12:113542104-113543518		chr12:113542020-113542103	chr12:113542019-113542020		0;0	0;0	2;8	0;0	0;2	0;0	0;5	0;0
K	intron_retention		chr12	-	chr12:110377053-110383064				chr12:110377052-110377053;chr12:110383064-110383065		14;0	13;2	44;2	45;0	45;2	30;0	36;5	38;3
N	alternative_acceptor	CPSF6	chr12	+	chr12:69653978-69656152	chr12:69653978-69656149		chr12:69656150-69656152	chr12:69656152-69656153		30;0	27;0	23;0	15;0	40;0	23;1	41;0	22;0
N	alternative_donor	OAS3	chr12	+	chr12:113405980-113407412	chr12:113405986-113407412		chr12:113405980-113405985	chr12:113405979-113405980		11;0	192;7	19;0	535;23	35;0	541;18	41;0	630;29
K	alternative_acceptor	PTPN6	chr12	+	chr12:7069599-7069968	chr12:7069599-7069825		chr12:7069826-7069968	chr12:7069968-7069969		102;0	35;0	139;3	63;1	198;2	55;0	205;4	89;1
K	jcn_only_AD	CPM	chr12	-	chr12:69326621-69326939	chr12:69326621-69326921		chr12:69326922-69326939	chr12:69326939-69326940		3;33	0;43	6;38	0;41	0;30	0;51	5;47	3;102
K	cassette	ISCU	chr12	+	chr12:108956513-108958054	chr12:108956513-108957835;chr12:108957932-108958054		chr12:108957836-108957931			42;6	22;3	83;6	56;10	53;3	49;8	61;6	61;6
K	intron_retention	PRPF40B	chr12	+	chr12:50031608-50035690				chr12:50031607-50031608;chr12:50035690-50035691		5;6	0;6	0;11	0;6	0;5	0;5	0;4	0;7
K	cassette	STAT6	chr12	-	chr12:57501098-57501945	chr12:57501098-57501387;chr12:57501527-57501945		chr12:57501388-57501526			7;47	3;34	14;55	9;126	7;80	8;84	9;72	9;108
K	jcn_only_AA	DYRK4,SP1	chr12	+	chr12:53775598-53776037	chr12:53775598-53775893		chr12:53775894-53776037	chr12:53776037-53776038		0;13	0;9	5;15	0;18	0;22	2;19	0;22	3;27
K	alternative_acceptor	PTPN6	chr12	+	chr12:7060895-7061145	chr12:7060895-7061074		chr12:7061075-7061145	chr12:7061145-7061146		89;3	20;0	122;4	48;2	106;2	36;0	134;6	61;3
K	alternative_donor	WNK1	chr12	+	chr12:999677-1003727	chr12:999680-1003727		chr12:999677-999679	chr12:999676-999677		0;17	2;15	7;27	5;17	6;32	0;8	8;22	3;24
K	jcn_only_AA	ARNTL2	chr12	+	chr12:27529321-27533179	chr12:27529321-27530373		chr12:27530374-27533179	chr12:27533179-27533180		0;0	0;0	0;0	2;2	0;0	0;0	0;0	6;0
N	jcn_only_AD	CD4	chr12	+	chr12:6923467-6923924;chr12:6923630-6923924	chr12:6923445-6923924		chr12:6923445-6923466;chr12:6923467-6923629	chr12:6923444-6923445;chr12:6923466-6923467		253;3	32;0	211;0	77;0	390;3	123;0	344;0	206;0
K	alternative_last_exon	SMUG1	chr12	-	chr12:54577744-54582734	chr12:54582381-54582734	chr12:54575241-54577743	chr12:54582295-54582380			2;2	3;1	8;1	6;2	6;1	1;2	5;2	3;1
N	alternative_donor	CLEC4E,SLC41A2	chr12	-	chr12:8689863-8691737;chr12:8689863-8691812	chr12:8689863-8690226		chr12:8690227-8691737;chr12:8691738-8691812	chr12:8691737-8691738;chr12:8691812-8691813		2;0	50;2	11;0	319;8	5;0	208;2	2;0	342;8
K	jcn_only_AD	RECQL,TWF1	chr12	-	chr12:21654150-21654396;chr12:21654150-21654414	chr12:21654150-21654346		chr12:21654347-21654396;chr12:21654397-21654414	chr12:21654396-21654397;chr12:21654414-21654415		0;6	0;0	0;7	7;9	14;9	5;2	11;17	8;8
N	alternative_donor	RPL41	chr12	+	chr12:56510584-56510972	chr12:56510648-56510972		chr12:56510584-56510647	chr12:56510583-56510584		1528;3	1078;2	1718;3	674;4	2652;6	958;2	2370;9	1332;3
K	alternative_donor	ERC1	chr12	+	chr12:1100489-1136913	chr12:1100654-1136913		chr12:1100489-1100653	chr12:1100488-1100489		0;1	0;2	0;5	3;6	6;1	8;4	7;2	6;2
K	cassette	PPHLN1	chr12	+	chr12:42729777-42748962	chr12:42729777-42745686;chr12:42745852-42748962		chr12:42745687-42745851			5;13	8;11	31;20	13;12	31;18	9;18	15;20	15;16
K	intron_retention	LYZ	chr12	+	chr12:69746079-69746932				chr12:69746078-69746079;chr12:69746932-69746933		7102;7	2892;0	1899;0	1730;0	1831;2	1083;0	1392;0	1593;0
K	intron_retention	SLC8B1	chr12	-	chr12:113756877-113758135				chr12:113756876-113756877;chr12:113758135-113758136		25;0	15;2	35;2	13;2	47;0	15;0	47;0	26;0
K	alternative_donor	GPN3	chr12	-	chr12:110903020-110905960	chr12:110903020-110905930		chr12:110905931-110905960	chr12:110905960-110905961		5;0	8;0	16;0	8;0	28;0	6;0	28;1	9;0
K	jcn_only_AD	MAPKAPK5	chr12	+	chr12:112326805-112327843	chr12:112326811-112327843		chr12:112326805-112326810	chr12:112326804-112326805		13;6	6;5	14;14	9;7	16;9	5;7	11;14	6;5
K	cassette	CAPRIN2	chr12	-	chr12:30872160-30876192	chr12:30872160-30873744;chr12:30873850-30876192		chr12:30873745-30873849			0;2	0;0	2;1	0;1	0;3	0;2	0;0	0;1
K	alternative_acceptor	PEX5	chr12	+	chr12:7355301-7356051	chr12:7355301-7356027		chr12:7356028-7356051	chr12:7356051-7356052		0;4	2;0	3;8	0;1	0;7	0;3	2;6	0;5
K	alternative_acceptor	RECQL	chr12	-	chr12:21654150-21654396	chr12:21654307-21654396		chr12:21654150-21654306	chr12:21654149-21654150		0;9	0;4	0;21	7;21	11;30	5;17	11;28	6;17
N	alternative_donor	OAS1	chr12	+	chr12:113349064-113354313;chr12:113349041-113354313	chr12:113349031-113354313		chr12:113349031-113349040;chr12:113349041-113349063	chr12:113349030-113349031;chr12:113349040-113349041		17;0	123;0	23;0	475;0	25;0	328;6	25;0	423;5
K	intron_retention	LRP1	chr12	+	chr12:57598533-57598891				chr12:57598532-57598533;chr12:57598891-57598892		378;5	76;0	372;4	60;0	655;16	124;3	567;11	145;2
N	cassette	LRRK2	chr12	+	chr12:40697937-40702268	chr12:40697937-40699586;chr12:40699769-40702268		chr12:40699587-40699768			0;6	0;12	0;6	0;6	0;6	3;18	0;4	0;17
K	alternative_first_exon	GXYLT1	chr12	-	chr12:42512974-42538227	chr12:42512974-42523560	chr12:42538228-42538681	chr12:42523561-42523653			1;1	0;2	3;1	5;4	2;3	3;4	3;1	2;3
K	jcn_only_AD	ING4	chr12	-	chr12:6762563-6765892	chr12:6762563-6764803					15;0	7;0	17;2	14;0	19;0	7;0	17;0	10;0
K	alternative_donor	IGF1,SMUG1	chr12	-	chr12:54582381-54582734	chr12:54582381-54582509		chr12:54582510-54582734	chr12:54582734-54582735		2;0	0;0	0;1	0;0	0;1	0;0	2;0	0;1
K	intron_retention		chr12	-	chr12:110377053-110385060				chr12:110377052-110377053;chr12:110385060-110385061		2;0	2;2	15;2	2;0	24;2	2;0	18;3	9;3
N	jcn_only_AD	ITGB7,TAOK3	chr12	-	chr12:118704565-118810452;chr12:118704565-118796727	chr12:118704565-118796723		chr12:118796724-118796727;chr12:118796728-118810452	chr12:118796727-118796728;chr12:118810452-118810453		16;0	15;0	11;0	35;0	23;0	19;0	19;14	33;0
K	cassette	RAP1B	chr12	+	chr12:69042562-69047891	chr12:69042562-69044179;chr12:69044249-69047891		chr12:69044180-69044248			0;54	0;94	2;110	5;188	0;124	2;123	0;120	6;120
K	cassette	PPP1R12A	chr12	-	chr12:80199549-80201005	chr12:80199549-80199945;chr12:80200114-80201005		chr12:80199946-80200113			8;13	6;13	14;11	10;14	15;13	7;13	11;14	9;18
K	jcn_only_AD	ARL6IP4	chr12	+	chr12:123465814-123466117	chr12:123465847-123466117		chr12:123465814-123465846	chr12:123465813-123465814		0;8	0;2	0;10	0;0	14;20	0;10	0;13	0;7
K	jcn_only_AA	CNOT2,STK38L	chr12	+	chr12:70672055-70704674	chr12:70672055-70687850					23;2	9;0	16;0	14;0	25;0	14;0	14;0	10;0
K	alternative_donor	GOLGA3,SLC8B1	chr12	-	chr12:133398898-133405388	chr12:133398898-133404912		chr12:133404913-133405388	chr12:133405388-133405389		2;2	0;0	0;4	3;1	5;3	0;1	6;4	5;2
K	jcn_only_AD	ATG101	chr12	+	chr12:52463856-52464137	chr12:52464027-52464137		chr12:52463856-52464026	chr12:52463855-52463856		0;7	0;6	0;9	0;8	2;11	0;7	0;13	0;6
K	intron_retention	SCARB1	chr12	-	chr12:125263133-125270902				chr12:125263132-125263133;chr12:125270902-125270903		9;6	5;0	19;2	0;0	19;5	3;0	13;2	0;0
K	coord_cassette	ARNTL2	chr12	+	chr12:27521346-27533179	chr12:27521346-27523061;chr12:27523164-27529278;chr12:27529321-27533179		chr12:27523062-27523163;chr12:27529279-27529320			0;0	30;1	13;0	20;3	3;1	28;4	7;0	24;6
K	alternative_donor	FBXW8	chr12	+	chr12:117348963-117365827	chr12:117349161-117365827		chr12:117348963-117349160	chr12:117348962-117348963		0;0	0;1	0;3	0;1	0;1	0;0	3;4	0;1
N	jcn_only_AA	CD163	chr12	-	chr12:7647998-7649408;chr12:7647862-7649408	chr12:7640684-7649408					680;0	1133;2	1053;0	600;0	1736;0	2061;0	1205;2	2677;0
K	intron_retention	MMP19	chr12	-	chr12:56232519-56234450				chr12:56232518-56232519;chr12:56234450-56234451		3;2	0;0	0;0	10;14	0;2	0;5	6;0	2;6
K	cassette	RHNO1	chr12	+	chr12:2986449-2997076	chr12:2986449-2994448;chr12:2994659-2997076		chr12:2994449-2994658			3;15	0;7	8;22	0;8	3;45	0;9	6;44	2;11
N	jcn_only_AD	TAOK3	chr12	-	chr12:118704565-118796723;chr12:118704565-118796727	chr12:118704565-118810452		chr12:118796724-118796727;chr12:118796728-118810452	chr12:118796727-118796728;chr12:118810452-118810453		0;16	0;15	0;11	0;35	8;15	0;19	14;19	5;28
K	intron_retention	CLEC2D	chr12	+	chr12:9845528-9845629				chr12:9845527-9845528;chr12:9845629-9845630		5;0	2;0	9;2	14;0	0;0	0;2	5;0	11;0
N	intron_retention		chr12	-	chr12:120901911-120903429				chr12:120901910-120901911;chr12:120903429-120903430		0;20	0;19	0;26	0;13	2;52	0;18	0;33	0;22
K	alternative_first_exon	ATF7	chr12	-	chr12:53994806-54020062	chr12:53994806-54019734	chr12:54020063-54020194	chr12:54019735-54019784			5;4	4;0	5;3	7;6	5;6	5;3	7;5	8;4
K	intron_retention	CD163	chr12	-	chr12:7655161-7656240				chr12:7655160-7655161;chr12:7656240-7656241		488;0	782;2	861;0	420;0	1092;2	1347;2	770;0	1681;3
K	coord_cassette	P2RX4	chr12	+	chr12:121648102-121659715	chr12:121648102-121654757;chr12:121654806-121654936;chr12:121655085-121659715		chr12:121654758-121654805;chr12:121654937-121655084			2;2	0;2	0;7	11;19	8;8	5;14	2;2	6;10
N	intron_retention		chr12	+	chr12:6646177-6646278				chr12:6646176-6646177;chr12:6646278-6646279		0;113	0;181	0;152	0;95	2;337	0;223	0;205	0;221
K	jcn_only_AD	IPO8,NEMP1	chr12	-	chr12:30837392-30843429	chr12:30837392-30839254					16;0	8;0	24;0	9;2	28;0	22;0	33;0	35;0
K	jcn_only_AD	CHFR	chr12	-	chr12:133438221-133446204;chr12:133438221-133438918	chr12:133438221-133448870					3;0	9;0	14;5	22;0	24;0	15;2	20;5	32;2
K	jcn_only_AD	MYL6	chr12	+	chr12:56553407-56553758	chr12:56553515-56553758		chr12:56553407-56553514	chr12:56553406-56553407		0;607	0;448	10;1384	0;1403	0;2023	0;1297	0;1743	17;1627
K	alternative_donor	CTDSP2	chr12	-	chr12:58220881-58221334	chr12:58220881-58221316		chr12:58221317-58221334	chr12:58221334-58221335		64;2	70;2	41;0	34;2	57;6	44;2	44;0	76;0
K	jcn_only_AD	TXNRD1	chr12	+	chr12:104681210-104682708;chr12:104681125-104682708	chr12:104680888-104682708		chr12:104680888-104681124;chr12:104681125-104681209	chr12:104680887-104680888;chr12:104681124-104681125		15;17	9;15	41;77	50;72	17;39	10;23	23;49	16;42
K	alternative_donor	RECQL,TWF1	chr12	-	chr12:21654150-21654396;chr12:21654150-21654414	chr12:21654150-21654346		chr12:21654347-21654396;chr12:21654397-21654414	chr12:21654396-21654397;chr12:21654414-21654415		1;5	0;0	1;7	5;6	10;7	4;3	9;13	7;6
K	jcn_only_AA	VEZT	chr12	+	chr12:95660409-95663826	chr12:95660409-95663814		chr12:95663815-95663826	chr12:95663826-95663827		0;3	11;7	2;11	19;23	17;10	10;14	20;11	7;11
K	alternative_acceptor	ARHGAP9	chr12	-	chr12:57871460-57871567	chr12:57871464-57871567		chr12:57871460-57871463	chr12:57871459-57871460		0;6	0;2	6;14	0;0	0;13	0;0	0;15	0;2
K	intron_retention	RECQL	chr12	-	chr12:21654150-21654414				chr12:21654149-21654150;chr12:21654414-21654415		0;10	0;6	0;15	0;20	2;23	0;13	0;27	2;15
K	intron_retention	CYP27B1	chr12	-	chr12:58157592-58157880				chr12:58157591-58157592;chr12:58157880-58157881		3;0	57;3	0;0	241;13	0;0	267;7	0;0	344;11
K	intron_retention	OS9	chr12	+	chr12:58114047-58114188				chr12:58114046-58114047;chr12:58114188-58114189		84;0	75;0	153;0	177;3	185;0	169;0	141;0	178;0
K	jcn_only_AD	RAD51AP1	chr12	+	chr12:4665669-4668022	chr12:4665717-4668022		chr12:4665669-4665716	chr12:4665668-4665669		5;0	0;0	22;0	31;0	57;0	14;0	56;3	25;0
K	intron_retention	VPS29	chr12	-	chr12:110934009-110939853				chr12:110934008-110934009;chr12:110939853-110939854		16;4	19;7	66;6	86;5	142;5	94;6	117;3	122;7
K	coord_cassette	PFDN5	chr12	+	chr12:53689424-53691633	chr12:53689424-53689622;chr12:53689726-53690027;chr12:53690060-53691633		chr12:53689623-53689725;chr12:53690028-53690059			23;261	13;105	52;281	20;114	55;365	16;146	50;329	32;187
K	intron_retention	SDS	chr12	-	chr12:113836957-113837360				chr12:113836956-113836957;chr12:113837360-113837361		86;0	40;0	94;0	148;0	83;2	167;0	93;0	195;2
K	alternative_acceptor	APPL2	chr12	-	chr12:105601808-105601935	chr12:105601826-105601935		chr12:105601808-105601825	chr12:105601807-105601808		15;0	2;0	41;1	2;0	52;1	0;0	36;0	9;0
K	cassette	P2RX4	chr12	+	chr12:121659970-121660749	chr12:121659970-121660532;chr12:121660571-121660749		chr12:121660533-121660570			17;0	27;0	58;0	301;2	91;0	117;0	50;0	95;0
K	alternative_donor	TXNRD1	chr12	+	chr12:104680888-104682708;chr12:104681125-104682708	chr12:104681210-104682708		chr12:104680888-104681124;chr12:104681125-104681209	chr12:104680887-104680888;chr12:104681124-104681125		29;0	26;1	113;1	127;1	58;1	35;1	68;2	59;1
K	intron_retention	CD163	chr12	-	chr12:7633853-7635238				chr12:7633852-7633853;chr12:7635238-7635239		626;0	957;6	1097;5	580;0	1448;0	1813;5	1016;0	2540;5
K	intron_retention	PTPN6	chr12	+	chr12:7069599-7069968				chr12:7069598-7069599;chr12:7069968-7069969		102;0	35;0	139;2	63;2	198;2	55;2	205;2	89;0
N	jcn_only_AD	RPL6	chr12	-	chr12:112846461-112847390;chr12:112846461-112846853	chr12:112846461-112847214		chr12:112846854-112847214;chr12:112847215-112847390	chr12:112847214-112847215;chr12:112847390-112847391		25;2	8;2	56;11	27;9	77;7	15;6	73;6	42;8
K	jcn_only_AA	DYNLL1	chr12	+	chr12:120934020-120934218	chr12:120934020-120934204		chr12:120934205-120934218	chr12:120934218-120934219		102;14	93;10	184;28	249;25	189;20	145;24	198;27	206;27
K	jcn_only_AA	UBE3B	chr12	+	chr12:109927810-109928849	chr12:109927810-109928294		chr12:109928295-109928849	chr12:109928849-109928850		15;0	8;0	18;3	9;0	13;0	11;0	15;0	18;0
K	alternative_donor	FAM101A,ZNF664	chr12	+	chr12:124457851-124458432	chr12:124457900-124458432		chr12:124457851-124457899	chr12:124457850-124457851		0;0	0;0	7;3	3;0	2;3	2;1	6;3	0;2
K	cassette	BCAT1	chr12	-	chr12:25031584-25047208	chr12:25031584-25034234;chr12:25034346-25047208		chr12:25034235-25034345			2;32	0;10	0;50	0;23	2;90	5;44	2;65	2;32
K	alternative_first_exon	MFSD5	chr12	+	chr12:53645820-53646601	chr12:53646053-53646601	chr12:53645370-53645819	chr12:53645880-53646052			1;4	0;5	3;11	1;13	3;14	0;8	1;15	1;15
K	cassette	ACVR1B	chr12	+	chr12:52374984-52377782	chr12:52374984-52376469;chr12:52376593-52377782		chr12:52376470-52376592			3;1	8;0	18;0	6;0	20;1	20;0	7;0	20;2
N	jcn_only_AA	CYP27B1	chr12	-	chr12:58159283-58159789	chr12:58159364-58159789		chr12:58159283-58159363	chr12:58159282-58159283		2;0	58;0	2;0	228;3	0;0	209;0	0;0	295;0
K	alternative_donor	MAPKAPK5	chr12	+	chr12:112326805-112327843	chr12:112326811-112327843		chr12:112326805-112326810	chr12:112326804-112326805		13;3	6;2	14;7	9;3	16;4	5;3	11;7	6;2
N	intron_retention		chr12	-	chr12:133311083-133311991				chr12:133311082-133311083;chr12:133311991-133311992		0;7	0;11	0;16	7;31	0;23	0;16	0;16	0;26
K	intron_retention	MON2	chr12	+	chr12:62954894-62959016				chr12:62954893-62954894;chr12:62959016-62959017		10;3	14;0	16;0	14;0	18;0	10;0	10;0	22;0
K	intron_retention	TPCN1	chr12	+	chr12:113722443-113722522				chr12:113722442-113722443;chr12:113722522-113722523		35;2	6;0	41;0	0;0	81;2	8;0	72;0	15;0
K	jcn_only_AA	C12orf43	chr12	-	chr12:121442293-121442805	chr12:121442296-121442805		chr12:121442293-121442295	chr12:121442292-121442293		5;0	0;0	6;0	2;0	2;2	0;0	2;0	0;0
K	intron_retention	KIAA1033	chr12	+	chr12:105546230-105550503				chr12:105546229-105546230;chr12:105550503-105550504		26;0	31;0	53;0	51;3	55;3	99;0	63;0	123;3
K	cassette	STX2	chr12	-	chr12:131276523-131283069	chr12:131276523-131280539;chr12:131280666-131283069		chr12:131280540-131280665			0;2	0;0	2;5	2;4	5;8	2;2	2;6	5;4
K	cassette	PXN	chr12	-	chr12:120653077-120659425	chr12:120653077-120653362;chr12:120653465-120659425		chr12:120653363-120653464			25;7	7;3	40;7	13;5	40;10	10;4	33;8	10;4
N	jcn_only_AD	LRRK2	chr12	+	chr12:40760862-40761445	chr12:40760880-40761445		chr12:40760862-40760879	chr12:40760861-40760862		0;9	3;17	0;11	0;8	0;11	0;32	0;8	0;26
N	mutually_exclusive	PLBD2	chr12	+	chr12:113822071-113823016,chr12:113823089-113824741	chr12:113822071-113822655,chr12:113822752-113824741	chr12:113823017-113823088	chr12:113822656-113822751			0;0	0;0	0;0	0;0	0;3	0;0	3;0	0;0
K	alternative_first_exon	SLC8B1	chr12	-	chr12:113770766-113772797	chr12:113770766-113772247	chr12:113772798-113772925	chr12:113772248-113772643			11;38	6;22	23;66	14;40	21;68	11;31	18;73	17;45
K	alternative_acceptor	NOP2	chr12	-	chr12:6675491-6675694	chr12:6675503-6675694		chr12:6675491-6675502	chr12:6675490-6675491		0;2	2;2	2;4	6;3	6;7	0;0	2;5	0;2
N	intron_retention		chr12	-	chr12:120654385-120659425				chr12:120654384-120654385;chr12:120659425-120659426		0;2	0;0	6;0	0;2	0;3	0;0	0;0	0;0
K	cassette	HDAC7	chr12	-	chr12:48192756-48213549	chr12:48192756-48196006;chr12:48196058-48213549		chr12:48196007-48196057			0;1	0;5	0;4	0;2	0;2	0;1	0;4	2;4
K	intron_retention	TPI1	chr12	+	chr12:6978555-6978851				chr12:6978554-6978555;chr12:6978851-6978852		283;0	643;3	423;0	441;0	1208;0	978;2	717;4	1195;2
N	cassette	DRAM1	chr12	+	chr12:102308011-102314993;chr12:102295212-102314993	chr12:102295212-102313886,chr12:102308011-102313886;chr12:102313980-102314993		chr12:102313887-102313979			0;40	0;193	0;182	25;524	10;167	39;452	10;138	42;505
K	intron_retention	PFDN5	chr12	+	chr12:53689424-53691633				chr12:53689423-53689424;chr12:53691633-53691634		23;2	13;0	52;3	20;0	55;4	16;3	50;2	32;2
K	jcn_only_AA	C1S	chr12	+	chr12:7168182-7169142	chr12:7168182-7169055		chr12:7169056-7169142	chr12:7169142-7169143		0;0	7;16	0;7	5;15	0;0	10;13	0;0	6;17
K	cassette	NDUFA12	chr12	-	chr12:95365397-95396514	chr12:95365397-95387945;chr12:95388034-95396514		chr12:95387946-95388033			0;27	0;11	2;52	0;30	2;91	0;21	0;77	0;42
K	cassette	CLEC4A	chr12	+	chr12:8276557-8288180	chr12:8276557-8281859;chr12:8281959-8288180		chr12:8281860-8281958			0;28	0;7	5;33	0;14	2;25	0;6	0;26	0;12
K	alternative_donor	AAAS,COQ5	chr12	-	chr12:53714477-53715254	chr12:53714477-53715126		chr12:53715127-53715254	chr12:53715254-53715255		0;9	0;1	0;9	0;7	0;19	0;5	2;17	0;4
K	alternative_donor	NOP2	chr12	-	chr12:6677089-6677372	chr12:6677089-6677304		chr12:6677305-6677372	chr12:6677372-6677373		3;0	3;1	17;2	9;1	14;3	0;1	8;3	6;0
N	alternative_acceptor	2019-03-09	chr12	+	chr12:58150868-58151890	chr12:58150868-58151073		chr12:58151074-58151890	chr12:58151890-58151891		6;1	0;3	9;4	30;10	16;3	17;10	8;2	33;8
K	jcn_only_AA	MRPL42	chr12	+	chr12:93861331-93862967	chr12:93861331-93862964		chr12:93862965-93862967	chr12:93862967-93862968		6;0	0;0	7;14	5;6	10;7	0;5	11;9	8;5
K	cassette	COX14	chr12	+	chr12:50506085-50513818	chr12:50506085-50512275;chr12:50512336-50513818		chr12:50512276-50512335			41;0	38;0	75;1	59;1	72;7	45;2	74;6	47;5
K	cassette	STAT6	chr12	-	chr12:57502083-57504911	chr12:57502083-57503723;chr12:57503894-57504911		chr12:57503724-57503893			25;4	15;2	35;7	60;14	57;4	40;11	39;6	73;8
K	intron_retention	IFFO1	chr12	-	chr12:6657327-6657590				chr12:6657326-6657327;chr12:6657590-6657591		22;10	7;4	39;15	14;3	27;15	10;2	33;13	15;0
K	alternative_first_exon	SCARB1	chr12	-	chr12:125302254-125351534	chr12:125302254-125348140	chr12:125351535-125351683	chr12:125348141-125348463			2;32	0;6	1;58	0;5	2;52	0;5	2;48	1;4
N	alternative_donor		chr12	-	chr12:133390006-133393245	chr12:133390006-133393125		chr12:133393126-133393245	chr12:133393245-133393246		0;4	0;1	0;10	0;2	0;5	0;1	9;9	8;4
K	jcn_only_AA	OAS1,PRPF40B	chr12	+	chr12:113346630-113348902	chr12:113346630-113348855		chr12:113348856-113348902	chr12:113348902-113348903		0;26	0;158	0;27	99;775	0;35	0;670	0;38	85;849
K	intron_retention	MYL6	chr12	+	chr12:56554105-56554409				chr12:56554104-56554105;chr12:56554409-56554410		43;7	28;5	117;7	181;16	117;15	115;12	143;11	177;13
K	intron_retention	GAPDH	chr12	+	chr12:6645760-6645849				chr12:6645759-6645760;chr12:6645849-6645850		926;0	1690;0	1491;0	1085;0	3693;0	2733;0	2425;2	3195;4
N	alternative_acceptor	SDS	chr12	-	chr12:113836957-113837360	chr12:113837033-113837360		chr12:113836957-113837032	chr12:113836956-113836957		86;0	40;0	94;0	148;0	83;0	167;1	93;0	195;1
N	jcn_only_AD	STAT2	chr12	-	chr12:56745235-56748249;chr12:56745235-56748202	chr12:56745235-56748242		chr12:56748203-56748242;chr12:56748243-56748249	chr12:56748242-56748243;chr12:56748249-56748250		30;0	49;0	45;0	228;0	36;0	188;3	33;0	223;0
K	cassette	IFFO1	chr12	-	chr12:6657992-6658921	chr12:6657992-6658641;chr12:6658651-6658921		chr12:6658642-6658650			7;11	0;4	10;13	0;12	14;19	5;10	13;22	5;8
N	alternative_acceptor	STX2	chr12	-	chr12:131289089-131291526;chr12:131289086-131291526	chr12:131286034-131291526		chr12:131286034-131289085;chr12:131289086-131289088	chr12:131286033-131286034;chr12:131289085-131289086		2;8	0;9	4;10	4;7	16;11	6;3	7;14	4;8
N	jcn_only_AA	SCARB1	chr12	-	chr12:125294812-125296415	chr12:125294836-125296415		chr12:125294812-125294835	chr12:125294811-125294812		0;50	0;13	0;67	0;10	2;56	0;8	0;77	0;13
N	intron_retention	STAT2	chr12	-	chr12:56745235-56748242				chr12:56745234-56745235;chr12:56748242-56748243		0;0	0;0	0;2	0;10	0;2	3;2	0;0	0;5
K	intron_retention		chr12	+	chr12:6646177-6646266				chr12:6646176-6646177;chr12:6646266-6646267		1055;0	1742;6	1606;2	1099;0	3850;7	2632;2	2745;3	3180;0
K	intron_retention	STAC3	chr12	-	chr12:57638150-57638319				chr12:57638149-57638150;chr12:57638319-57638320		25;0	24;0	26;0	68;2	43;0	90;3	44;0	97;4
K	intron_retention	GAPDH	chr12	+	chr12:6646383-6646474				chr12:6646382-6646383;chr12:6646474-6646475		1376;0	2373;2	2378;0	1589;0	6010;5	4365;2	4169;5	5352;7
K	alternative_acceptor	OAS1	chr12	+	chr12:113355506-113357291	chr12:113355506-113356401		chr12:113356402-113357291	chr12:113357291-113357292		3;16	10;54	0;15	28;172	2;20	30;178	0;21	32;223
N	alternative_donor	CLEC2D	chr12	+	chr12:9821392-9833518;chr12:9822392-9833518;chr12:9809753-9833518	chr12:9820868-9833518		chr12:9809753-9820867;chr12:9820868-9821391;chr12:9821392-9822391	chr12:9809752-9809753;chr12:9820867-9820868;chr12:9821391-9821392		7;1	0;0	2;0	3;1	0;0	0;0	0;0	2;0
K	alternative_acceptor	OS9	chr12	+	chr12:58109754-58109874	chr12:58109754-58109871		chr12:58109872-58109874	chr12:58109874-58109875		78;17	43;16	181;29	244;51	188;34	191;43	144;32	208;44
K	jcn_only_AA	CAPRIN2	chr12	-	chr12:30868076-30869441	chr12:30868079-30869441		chr12:30868076-30868078	chr12:30868075-30868076		0;0	0;0	3;0	0;0	5;0	2;3	0;0	3;0
K	cassette	CD4	chr12	+	chr12:6898829-6923307	chr12:6898829-6909237;chr12:6909354-6923307		chr12:6909238-6909353			8;180	3;40	9;128	0;56	18;209	7;74	16;206	6;121
K	cassette	OASL	chr12	-	chr12:121461941-121469244	chr12:121461941-121465378;chr12:121465621-121469244		chr12:121465379-121465620			0;2	3;68	5;13	113;842	0;5	83;563	0;6	86;577
K	alternative_acceptor	C1S	chr12	+	chr12:7168182-7169142	chr12:7168182-7169055		chr12:7169056-7169142	chr12:7169142-7169143		0;0	7;14	0;3	5;12	0;0	10;12	0;0	6;20
N	alternative_donor	NCOR2	chr12	-	chr12:124820179-124821298	chr12:124820179-124821184		chr12:124821185-124821298	chr12:124821298-124821299		30;1	10;1	44;3	19;0	48;2	14;0	48;4	18;2
K	jcn_only_AD	DNAJC14	chr12	-	chr12:56222499-56223272	chr12:56222499-56222924		chr12:56222925-56223272	chr12:56223272-56223273		0;0	6;0	9;0	26;0	10;0	14;5	9;0	13;0
K	jcn_only_AD	PARPBP	chr12	+	chr12:102517820-102547646	chr12:102542242-102547646					0;0	0;0	0;2	0;0	2;2	0;0	0;10	0;0
K	intron_retention	ARL6IP4	chr12	+	chr12:123467086-123467166				chr12:123467085-123467086;chr12:123467166-123467167		59;0	39;2	130;4	26;0	166;10	52;0	170;3	58;0
K	cassette	CLIP1	chr12	-	chr12:122832027-122837272	chr12:122832027-122835657;chr12:122835691-122837272		chr12:122835658-122835690			0;0	3;0	5;2	5;3	3;2	8;1	6;0	10;0
K	alternative_last_exon	TSFM	chr12	+	chr12:58186857-58196337	chr12:58186857-58189959	chr12:58196338-58196557	chr12:58189960-58191370			1;5	1;15	1;14	4;29	1;14	1;17	1;14	1;23
N	intron_retention	STAT2	chr12	-	chr12:56740740-56740920				chr12:56740739-56740740;chr12:56740920-56740921		0;0	0;7	0;3	3;30	0;2	0;20	0;2	0;25
K	jcn_only_AD	USP5	chr12	+	chr12:6972473-6972993	chr12:6972542-6972993		chr12:6972473-6972541	chr12:6972472-6972473		8;2	16;0	38;0	9;0	32;0	13;0	31;5	17;0
K	jcn_only_AA	SLC11A2	chr12	-	chr12:51399220-51402258	chr12:51399461-51402258					14;0	32;0	66;0	114;2	44;0	59;0	51;0	101;5
K	cassette	PPP1R12A	chr12	-	chr12:80214947-80222099	chr12:80214947-80215895;chr12:80215971-80222099		chr12:80215896-80215970			0;16	0;12	2;20	0;30	0;30	0;20	0;23	0;23
K	jcn_only_AA	ESYT1,FRS2	chr12	+	chr12:69864311-69924644	chr12:69864311-69874078					5;0	0;0	3;0	3;2	5;0	9;0	8;0	9;2
K	coord_cassette	DNM1L	chr12	+	chr12:32890096-32892997	chr12:32890096-32890798;chr12:32890877-32891197;chr12:32891231-32892997		chr12:32890799-32890876;chr12:32891198-32891230			0;2	6;2	0;4	5;6	2;6	8;5	5;5	7;5
K	jcn_only_AD	SLC8B1	chr12	-	chr12:113759154-113770553	chr12:113759154-113770527		chr12:113770528-113770553	chr12:113770553-113770554		0;22	0;10	2;69	0;34	0;51	0;32	0;61	0;31
N	alternative_donor	GNS,RAD52	chr12	-	chr12:65130888-65133160	chr12:65130888-65133147		chr12:65133148-65133160	chr12:65133160-65133161		261;0	441;0	240;0	797;1	360;0	830;0	348;0	836;0
K	intron_retention	SDS	chr12	-	chr12:113836652-113836916				chr12:113836651-113836652;chr12:113836916-113836917		91;2	47;0	92;2	125;2	74;0	133;2	77;2	186;6
K	intron_retention	SLC8B1	chr12	-	chr12:113758492-113758654				chr12:113758491-113758492;chr12:113758654-113758655		9;0	8;0	39;2	14;0	27;2	14;0	28;2	26;0
N	jcn_only_AD	CIT	chr12	-	chr12:56742589-56743128	chr12:56742589-56742707					0;41	0;92	0;53	3;299	0;47	0;300	0;41	0;338
N	intron_retention		chr12	+	chr12:113405980-113407444				chr12:113405979-113405980;chr12:113407444-113407445		0;5	0;60	0;9	2;184	0;11	0;184	0;9	2;235
N	jcn_only_AD	EEA1,LINC00937	chr12	-	chr12:93192863-93195375	chr12:93192863-93194656		chr12:93194657-93195375	chr12:93195375-93195376		15;0	0;0	20;0	7;0	13;2	6;0	22;0	8;0
K	cassette	CLIP1	chr12	-	chr12:122826245-122837272	chr12:122826245-122831921;chr12:122832027-122837272		chr12:122831922-122832026			10;2	23;2	17;12	19;12	15;6	35;7	26;6	40;8
N	jcn_only_AD	SH2B3	chr12	+	chr12:111856682-111884556;chr12:111858293-111884556	chr12:111882663-111884556		chr12:111856682-111858292;chr12:111858293-111882662	chr12:111856681-111856682;chr12:111858292-111858293		36;0	6;0	30;0	33;3	61;0	24;0	74;0	25;0
K	intron_retention	CD163	chr12	-	chr12:7623994-7632455				chr12:7623993-7623994;chr12:7632455-7632456		389;0	649;2	895;0	468;2	1138;2	1342;7	755;0	2083;7
N	alternative_donor	SH2B3	chr12	+	chr12:111856682-111884556;chr12:111858293-111884556	chr12:111882663-111884556		chr12:111856682-111858292;chr12:111858293-111882662	chr12:111856681-111856682;chr12:111858292-111858293		36;2	6;0	31;1	33;2	53;2	24;1	69;2	25;1
K	jcn_only_AD	RASAL1	chr12	-	chr12:113539815-113541750	chr12:113539815-113540740		chr12:113540741-113541750	chr12:113541750-113541751		0;0	0;0	2;5	0;0	0;0	0;0	0;0	0;0
K	alternative_acceptor	CS	chr12	-	chr12:56669928-56676203	chr12:56669980-56676203		chr12:56669928-56669979	chr12:56669927-56669928		0;35	0;27	0;76	3;40	0;106	0;40	0;104	0;43
K	cassette	SFSWAP	chr12	+	chr12:132241190-132250662	chr12:132241190-132249000;chr12:132249232-132250662		chr12:132249001-132249231			0;12	0;5	3;15	0;12	0;21	0;7	0;17	0;18
N	jcn_only_AD	CD4	chr12	+	chr12:6923445-6923924;chr12:6923630-6923924	chr12:6923467-6923924		chr12:6923445-6923466;chr12:6923467-6923629	chr12:6923444-6923445;chr12:6923466-6923467		3;253	0;32	11;200	0;77	8;385	0;123	10;334	0;206
K	intron_retention	CLEC2D	chr12	+	chr12:9840683-9847355				chr12:9840682-9840683;chr12:9847355-9847356		0;0	0;0	0;4	0;0	0;0	2;0	0;0	0;0
N	alternative_acceptor	DRAM1	chr12	+	chr12:102271699-102291640	chr12:102271699-102283877		chr12:102283878-102291640	chr12:102291640-102291641		11;0	100;0	103;0	314;0	83;0	299;0	91;0	331;0
N	alternative_donor	MLEC	chr12	+	chr12:121125335-121131893	chr12:121125512-121131893		chr12:121125335-121125511	chr12:121125334-121125335		22;1	16;0	82;7	14;1	103;3	25;1	103;2	31;1
N	jcn_only_AA	SRSF9	chr12	-	chr12:120901911-120903429	chr12:120901926-120903429		chr12:120901911-120901925	chr12:120901910-120901911		0;47	0;61	0;139	0;78	2;200	0;100	0;192	0;103
N	jcn_only_AA		chr12	.	chr12:7980206-8082279	chr12:8078545-8082279		chr12:7980206-8078544	chr12:7980205-7980206		0;0	0;0	2;14	0;0	0;11	0;9	0;13	0;26
N	intron_retention	DRAM1	chr12	+	chr12:102295212-102313886				chr12:102295211-102295212;chr12:102313886-102313887		0;0	24;3	36;2	66;14	0;0	69;10	0;0	81;10
K	intron_retention	CDK2	chr12	+	chr12:56360909-56361640				chr12:56360908-56360909;chr12:56361640-56361641		0;0	14;3	9;0	8;0	20;2	15;0	26;0	22;0
K	cassette	OSBPL8	chr12	-	chr12:76844760-76881289;chr12:76844769-76881289	chr12:76844760-76853638,chr12:76844769-76853638;chr12:76853676-76881289		chr12:76853639-76853675			5;2	0;1	23;2	16;8	18;4	8;3	17;4	14;2
K	intron_retention	GAPDH	chr12	+	chr12:6645957-6646085				chr12:6645956-6645957;chr12:6646085-6646086		966;2	1810;2	1670;0	1111;0	3869;6	2828;0	2601;2	3345;6
N	alternative_acceptor		chr12	+	chr12:54912517-54912727	chr12:54912517-54912697		chr12:54912698-54912727	chr12:54912727-54912728		0;68	0;41	11;94	0;48	8;130	5;44	2;104	0;78
K	intron_retention	PXN	chr12	-	chr12:120653077-120653362				chr12:120653076-120653077;chr12:120653362-120653363		6;3	3;3	2;8	2;5	6;9	2;0	8;10	0;3
K	intron_retention	DCTN2	chr12	-	chr12:57926806-57927020				chr12:57926805-57926806;chr12:57927020-57927021		47;0	32;0	75;0	75;3	90;0	56;2	114;0	110;0
K	alternative_first_exon	CCDC77	chr12	+	chr12:498653-514676	chr12:510851-514676	chr12:498514-498652	chr12:510742-510850			5;0	5;1	9;0	7;3	5;2	7;0	10;2	10;2
K	jcn_only_AD	CTD-2140B24.4,ZNF268	chr12	+	chr12:133768590-133778729	chr12:133770120-133778729					0;0	0;0	2;5	0;3	0;5	0;0	0;6	2;6
K	alternative_acceptor	OAS1,PRPF40B	chr12	+	chr12:113346630-113348902	chr12:113346630-113348855		chr12:113348856-113348902	chr12:113348902-113348903		0;20	0;124	0;23	99;584	0;27	0;467	0;30	85;634
K	intron_retention	ISCU	chr12	+	chr12:108956513-108958054				chr12:108956512-108956513;chr12:108958054-108958055		42;2	22;2	83;4	56;2	53;0	49;2	61;0	61;3
N	cassette	PLBD2	chr12	+	chr12:113822752-113824741	chr12:113822752-113823016;chr12:113823089-113824741		chr12:113823017-113823088			0;61	0;40	0;194	0;124	2;172	0;120	0;157	0;138
K	alternative_first_exon	HVCN1,PXN	chr12	-	chr12:120662181-120664164;chr12:120662181-120662445	chr12:120662181-120703419	chr12:120664165-120664647;chr12:120662446-120662530	chr12:120703420-120703574			6;14	3;7	10;39	4;1	12;25	7;4	13;36	6;9
K	cassette	LYZ	chr12	+	chr12:69744053-69746932	chr12:69744053-69745999;chr12:69746079-69746932		chr12:69746000-69746078			0;7317	0;3014	0;1869	0;1645	8;1707	0;1032	5;1356	0;1503
K	alternative_acceptor	MMP19	chr12	-	chr12:56234992-56236136	chr12:56235021-56236136		chr12:56234992-56235020	chr12:56234991-56234992		3;29	2;13	0;25	11;162	0;24	5;39	0;43	7;97
N	cassette	RACGAP1	chr12	-	chr12:50384127-50385780	chr12:50384127-50384466;chr12:50384576-50385780		chr12:50384467-50384575			0;9	0;1	0;17	0;7	0;58	0;4	0;66	2;13
K	intron_retention	STAC3	chr12	-	chr12:57642587-57642823				chr12:57642586-57642587;chr12:57642823-57642824		18;0	20;0	34;0	77;4	51;0	94;4	51;0	105;3
K	intron_retention		chr12	-	chr12:110377053-110389016				chr12:110377052-110377053;chr12:110389016-110389017		0;14	2;11	0;19	0;13	0;26	0;15	0;26	2;22
K	alternative_donor	RECQL	chr12	-	chr12:21654150-21654346;chr12:21654150-21654396	chr12:21654150-21654414		chr12:21654347-21654396;chr12:21654397-21654414	chr12:21654396-21654397;chr12:21654414-21654415		6;0	0;0	8;0	11;0	15;2	7;0	22;0	11;2
K	jcn_only_AA	OAS1	chr12	+	chr12:113355506-113357291	chr12:113355506-113356401		chr12:113356402-113357291	chr12:113357291-113357292		3;0	10;16	0;0	28;69	2;0	30;65	0;0	32;58
K	intron_retention	OS9	chr12	+	chr12:58112966-58114188				chr12:58112965-58112966;chr12:58114188-58114189		44;2	33;3	100;3	118;3	103;2	80;3	78;5	92;2
K	alternative_first_exon	DGKA	chr12	+	chr12:56325908-56330206;chr12:56325129-56330206	chr12:56326040-56330206	chr12:56324756-56325128	chr12:56325812-56326039			0;0	0;0	4;1	0;0	0;0	5;0	0;1	2;2
K	intron_retention	TMEM198B	chr12	+	chr12:56225134-56226742				chr12:56225133-56225134;chr12:56226742-56226743		2;4	0;0	2;0	0;0	3;0	0;0	5;0	0;0
K	intron_retention	GAPDH	chr12	+	chr12:6643736-6643975				chr12:6643735-6643736;chr12:6643975-6643976		890;0	1708;7	1288;3	833;0	3250;3	2228;4	2023;0	2551;5
K	alternative_acceptor	FBXO21	chr12	-	chr12:117595869-117603289	chr12:117595890-117603289		chr12:117595869-117595889	chr12:117595868-117595869		6;0	3;0	0;3	0;1	11;1	2;0	14;2	6;1
K	intron_retention	IRAK4	chr12	+	chr12:44166876-44167767				chr12:44166875-44166876;chr12:44167767-44167768		9;2	9;3	13;0	23;2	20;4	18;5	11;4	17;0
N	intron_retention	CLEC4E	chr12	-	chr12:8689863-8690226				chr12:8689862-8689863;chr12:8690226-8690227		0;0	0;2	0;0	2;5	0;0	0;3	0;0	0;9
N	cassette	MPHOSPH9	chr12	-	chr12:123651337-123664472	chr12:123651337-123661234;chr12:123661337-123664472		chr12:123661235-123661336			0;1	0;2	0;5	0;2	0;12	0;1	2;11	0;5
N	alternative_donor	ETV6	chr12	+	chr12:11905514-11992073	chr12:11982164-11992073		chr12:11905514-11982163	chr12:11905513-11905514		17;0	32;0	32;0	49;1	26;0	44;0	26;0	41;1
K	alternative_donor	RAD51AP1	chr12	+	chr12:4665669-4668022	chr12:4665717-4668022		chr12:4665669-4665716	chr12:4665668-4665669		5;0	0;0	22;0	31;1	57;1	14;0	56;3	25;0
K	alternative_acceptor	BICD1,PCBP2,RP11-793H13.8	chr12	+	chr12:53854928-53856276	chr12:53854928-53856264		chr12:53856265-53856276	chr12:53856276-53856277		175;76	72;46	167;84	105;61	232;122	102;54	233;116	144;58
[truncated: 24,096 more rows]

## Sheet: JuncBASE t-test Unfiltered
#Contains_Novel_or_Only_Known(Annotated)_Junctions	as_event_type	gene_name	chr	strand	exclusion_junctions	inclusion_junctions	exclusion_exons	inclusion_exons	intron-exon_junctions	neighboring_constitutive_exons	accepted_hits_6	accepted_hits_8	accepted_hits_20	accepted_hits_22	accepted_hits_34	accepted_hits_36	accepted_hits_48	accepted_hits_50	set1_med	set2_med	delta_val	raw_pval	corrected_pval
K	intron_retention	MGAT1	chr5	-	chr5:180220098-180230601				chr5:180220097-180220098;chr5:180230601-180230602		1.5	0	0	19.7	2.08	3.23	0	3.9	0.75	3.56	2.81	0.541621	1
K	jcn_only_AA	FBXL3	chr13	-	chr13:77576185-77589543	chr13:77581924-77589543		chr13:77576185-77581923	chr13:77576184-77576185		100	100	100	100	94.12	100	100	100	100	100	0	0.391002	0.678877
N	jcn_only_AD	DNAJB12	chr10	-	chr10:74094376-74095537;chr10:74094376-74095591	chr10:74094376-74095543		chr10:74095538-74095543;chr10:74095544-74095591	chr10:74095543-74095544;chr10:74095591-74095592		NA	NA	0	0	0	0	0	10.34	0	0	0	0.42265	0.643086
K	alternative_last_exon	USP19	chr3	-	chr3:49145962-49147616	chr3:49146619-49147616	chr3:49145479-49145961	chr3:49146106-49146618			20	16.67	19.23	19.05	18.52	17.65	12	14.29	18.88	17.16	-1.71	0.813535	0.914134
N	jcn_only_AD	TFG	chr3	+	chr3:100428433-100432486;chr3:100428276-100432486	chr3:100428566-100432486		chr3:100428276-100428432;chr3:100428433-100428565	chr3:100428275-100428276;chr3:100428432-100428433		NA	100	100	93.02	100	100	90	95.92	100	97.96	-2.04	0.888827	0.969468
K	jcn_only_AD	SLC50A1	chr1	+	chr1:155108853-155109303	chr1:155108873-155109303		chr1:155108853-155108872	chr1:155108852-155108853		0	0	0	0	0	14.29	0	0	0	0	0	0.391002	0.643086
N	jcn_only_AA	CREM	chr10	+	chr10:29704342-29746579	chr10:29704342-29709419		chr10:29709420-29746579	chr10:29746579-29746580		100	100	100	100	80	100	88	83.33	94	100	6	0.573579	0.799209
K	intron_retention	ACO1	chr9	+	chr9:32434700-32436247				chr9:32434699-32434700;chr9:32436247-32436248		0	0	0	50	0	64.71	0	64.29	0	57.15	57.15	0.119335	1
K	cassette	CCNYL1	chr2	+	chr2:208591601-208602134	chr2:208591601-208598670;chr2:208598772-208602134		chr2:208598671-208598771			100	100	94.23	94.05	94.12	86.96	84	91.18	94.18	92.62	-1.56	0.992902	0.998106
K	intron_retention	CDK5RAP3	chr17	+	chr17:46053020-46053234				chr17:46053019-46053020;chr17:46053234-46053235		37.5	NA	22.5	33.33	23.91	25	20.41	26.92	23.2	26.92	3.72	0.801988	1
N	alternative_first_exon	WIPF1	chr2	-	chr2:175450340-175462328;chr2:175450340-175494393;chr2:175450340-175499245	chr2:175450340-175547501	chr2:175462329-175462586;chr2:175494394-175494596;chr2:175499246-175499307	chr2:175547502-175547627			4.69	29.63	2.86	17.78	2.5	16.49	4.24	16.67	3.55	17.23	13.68	0.012431	0.108192
K	jcn_only_AA	TBC1D2B	chr15	-	chr15:78290646-78293960	chr15:78290698-78293960		chr15:78290646-78290697	chr15:78290645-78290646		100	84	100	100	100	100	100	91.89	100	95.94	-4.06	0.214022	0.678877
K	jcn_only_AA	PTBP1	chr19	+	chr19:805188-805512	chr19:805188-805491		chr19:805492-805512	chr19:805512-805513		88.89	100	100	100	96.97	100	91.23	100	94.1	100	5.9	0.110748	0.678877
K	cassette	IFI44	chr1	+	chr1:79115591-79119927	chr1:79115591-79115870;chr1:79116338-79119927		chr1:79115871-79116337			100	100	100	91.3	100	100	100	91.44	100	95.72	-4.28	0.181711	0.698148
K	jcn_only_AA	WARS	chr14	-	chr14:100828259-100842596	chr14:100835596-100842596					100	80	100	91.04	86.49	91.07	96.08	91.89	98.04	91.06	-6.98	0.146019	0.678877
K	intron_retention	NR1H3	chr11	+	chr11:47280811-47281341				chr11:47280810-47280811;chr11:47281341-47281342		14.71	24.75	5.38	12.56	0	15.15	10.64	12.24	8.01	13.86	5.85	0.250026	1
K	intron_retention	NMT1	chr17	+	chr17:43181245-43182226				chr17:43181244-43181245;chr17:43182226-43182227		6.25	0	0	3.77	0	0	0	0	0	0	0	0.629122	1
K	cassette	STX3	chr11	+	chr11:59562956-59568327	chr11:59562956-59564755;chr11:59564870-59568327		chr11:59564756-59564869			NA	NA	100	100	100	86.96	92.31	100	100	100	0	0.74554	0.900649
K	coord_cassette	AGAP3	chr7	+	chr7:150831656-150838984	chr7:150831656-150835229;chr7:150835401-150837065;chr7:150837204-150838984		chr7:150835230-150835400;chr7:150837066-150837203			100	100	100	100	81.13	92.31	100	100	100	100	0	0.612633	0.830627
K	alternative_first_exon	CCND3,CUTA	chr6	-	chr6:33385473-33385863,chr6:33385473-33385735	chr6:33385473-33385645	chr6:33385864-33385899	chr6:33385646-33385708			39.39	NA	31.91	42.11	33.33	38.89	28.33	57.14	32.62	42.11	9.49	0.136553	0.362598
K	cassette	CCDC88A	chr2	-	chr2:55529209-55535944	chr2:55529209-55530204;chr2:55530289-55535944		chr2:55530205-55530288			55.56	46.88	54.72	62.79	52.78	57.14	59.09	50	55.14	53.57	-1.57	0.744839	0.900649
N	alternative_acceptor	IRF8	chr16	+	chr16:85942780-85945175	chr16:85942780-85943089		chr16:85943090-85945175	chr16:85945175-85945176		10	8.11	6.61	5.56	8.11	6.67	4.58	2.78	7.36	6.12	-1.24	0.374185	0.758651
N	alternative_acceptor	CHIT1	chr1	-	chr1:203186907-203187062	chr1:203186994-203187062		chr1:203186907-203186993	chr1:203186906-203186907		100	100	NA	NA	100	100	100	92.31	100	100	0	0.42265	0.758651
K	intron_retention	FGD2	chr6	+	chr6:36990147-36993567				chr6:36990146-36990147;chr6:36993567-36993568		0	0	0	7.39	0	0	0	3.75	0	1.88	1.88	0.50788	1
K	intron_retention	CD300LF	chr17	-	chr17:72692357-72694507				chr17:72692356-72692357;chr17:72694507-72694508		0	NA	3.08	0	0	0	0	7.14	0	0	0	0.648395	1
K	cassette	ERP29	chr12	+	chr12:112451414-112459953	chr12:112451414-112457559;chr12:112457699-112459953		chr12:112457560-112457698			90.12	91.23	97.95	98.03	96.05	96.7	97.94	98.51	97	97.37	0.37	0.817434	0.927254
K	jcn_only_AA	SF1	chr11	-	chr11:64532991-64534371	chr11:64533628-64534371		chr11:64532991-64533627	chr11:64532990-64532991		51.52	34.62	43.04	45.61	37.89	36.51	41.67	39.02	42.36	37.77	-4.59	0.267812	0.678877
K	cassette	ISCU	chr12	+	chr12:108956513-108958054	chr12:108956513-108957835;chr12:108957932-108958054		chr12:108957836-108957931			12.5	12	6.74	15.15	5.36	14.04	8.96	8.96	7.85	13.02	5.17	0.092518	0.698148
K	cassette	SIVA1	chr14	+	chr14:105219657-105222940	chr14:105219657-105221966;chr14:105222162-105222940		chr14:105221967-105222161			100	100	93.48	NA	100	100	100	100	100	100	0	0.391002	0.698148
K	cassette	ST3GAL5	chr2	-	chr2:86073687-86074983	chr2:86073687-86074504;chr2:86074686-86074983		chr2:86074505-86074685			4.55	0	5.88	3.7	0	2.78	7.69	6.06	5.21	3.24	-1.97	0.526132	0.781386
K	alternative_first_exon	PARVG	chr22	+	chr22:44569072-44579197	chr22:44577798-44579197	chr22:44568836-44569071	chr22:44577619-44577797			72.73	100	88.51	NA	93.98	100	92.41	100	90.46	100	9.54	0.074296	0.275847
K	cassette	C8orf59	chr8	-	chr8:86129732-86132534	chr8:86129732-86131551;chr8:86131593-86132534		chr8:86131552-86131592			0	4	18.52	16.67	5.36	2.78	4.92	4	5.14	4	-1.14	0.949913	0.980279
K	alternative_donor	SLC39A9	chr14	+	chr14:69865168-69890810;chr14:69865321-69890810	chr14:69866183-69890810		chr14:69865168-69865320;chr14:69865321-69866182	chr14:69865167-69865168;chr14:69865320-69865321		100	100	100	100	100	100	93.33	77.78	100	100	0	0.543888	0.832648
K	jcn_only_AA	DISP1,PRRC2C,RP11-455P21.3	chr1	+	chr1:171481340-171482139	chr1:171481340-171482133		chr1:171482134-171482139	chr1:171482139-171482140		68.18	74.29	0	64.52	71.43	65.67	66.67	57.14	67.43	65.09	-2.33	0.484533	0.728485
K	intron_retention	PTOV1	chr19	+	chr19:50360388-50360949				chr19:50360387-50360388;chr19:50360949-50360950		0	0	0	NA	6.78	0	0	5.71	0	0	0	0.798129	1
K	cassette	DIABLO	chr12	-	chr12:122693125-122701034	chr12:122693125-122694243;chr12:122694406-122701034		chr12:122694244-122694405			0	0	4	5.66	1.75	9.09	0	4.26	0.88	4.96	4.08	0.183786	0.698148
K	cassette	STYXL1	chr7	-	chr7:75634723-75651168	chr7:75634723-75643059;chr7:75643206-75651168		chr7:75643060-75643205			77.27	100	83.87	63.89	74.29	100	76.47	100	76.87	100	23.13	0.246904	0.698148
K	jcn_only_AD	DNAJC19,LRRFIP2	chr3	-	chr3:180703785-180704785	chr3:180703785-180704730		chr3:180704731-180704785	chr3:180704785-180704786		NA	100	100	100	92.59	NA	100	75	100	100	0	0.56027	0.769464
N	jcn_only_AD	GBF1	chr10	+	chr10:104136886-104139040	chr10:104136898-104139040		chr10:104136886-104136897	chr10:104136885-104136886		NA	38.46	20	0	35.14	23.81	35.29	31.82	35.14	27.81	-7.33	0.53163	0.746377
N	alternative_acceptor		chr12	+	chr12:54912517-54912727	chr12:54912517-54912697		chr12:54912698-54912727	chr12:54912727-54912728		100	100	89.52	100	94.2	89.8	98.11	100	96.16	100	3.84	0.584387	0.890148
K	intron_retention	NELFCD	chr20	+	chr20:57566131-57566366				chr20:57566130-57566131;chr20:57566366-57566367		25	NA	22.58	70.83	39.29	62.5	27.91	61.54	26.45	62.5	36.05	0.043433	1
K	jcn_only_AD	RNF146	chr6	+	chr6:127601486-127607760	chr6:127607323-127607760					NA	66.67	76.19	47.37	72.97	57.89	72.22	50	72.97	53.95	-19.02	0.020564	0.643086
K	alternative_first_exon	MRAS	chr3	+	chr3:138067610-138091707;chr3:138067875-138091707;chr3:138068222-138091707	chr3:138067168-138091707	chr3:138067314-138067609;chr3:138067692-138067874;chr3:138068104-138068221	chr3:138066490-138067167			61.54	NA	66.67	72.92	66.67	73.33	62.5	57.14	64.59	72.92	8.33	0.587774	0.777355
K	intron_retention	IL10RA	chr11	+	chr11:117857250-117857398				chr11:117857249-117857250;chr11:117857398-117857399		31.82	34.62	64.29	38.54	NA	32.2	31.25	32.56	31.82	33.59	1.77	0.755377	1
K	jcn_only_AA	SRSF10	chr1	-	chr1:24294214-24298062	chr1:24294447-24298062		chr1:24294214-24294446	chr1:24294213-24294214		NA	NA	0	23.81	12.73	0	18.18	0	12.73	0	-12.73	0.818821	0.919155
K	jcn_only_AD	SDF2	chr17	-	chr17:26982502-26989063	chr17:26982502-26988743		chr17:26988744-26989063	chr17:26989063-26989064		66.67	84.21	78.12	76.79	65.12	75.68	62.5	85.11	65.9	80.5	14.6	0.030091	0.643086
K	alternative_donor	FECH	chr18	-	chr18:55240598-55247304	chr18:55240598-55247286		chr18:55247287-55247304	chr18:55247304-55247305		5.26	NA	11.11	0	2.04	0	4.65	0	4.96	0	-4.96	0.057092	0.725437
K	intron_retention	TSPAN33	chr7	+	chr7:128807402-128807613				chr7:128807401-128807402;chr7:128807613-128807614		0	2.38	NA	6.38	4.26	6.32	0	6.34	0	6.33	6.33	0.222602	1
K	alternative_donor	CNOT1	chr16	-	chr16:58589813-58590765	chr16:58589813-58590750		chr16:58590751-58590765	chr16:58590765-58590766		56.25	58.33	72.41	65	70	69.23	57.63	68.57	63.81	66.78	2.97	0.813038	0.947115
K	alternative_first_exon	ENSA,ZRANB2	chr1	-	chr1:150600069-150601889	chr1:150600069-150601536	chr1:150601890-150602072	chr1:150601537-150601616			0	8.22	2.07	4.17	2.87	6.06	4.02	7.04	2.47	6.55	4.08	0.013975	0.111324
N	jcn_only_AD	SNX17	chr2	+	chr2:27594211-27595489	chr2:27594336-27595489		chr2:27594211-27594335	chr2:27594210-27594211		0	0	0	0	2.75	0	0	5.17	0	0	0	0.698078	0.867196
N	intron_retention	GPNMB	chr7	+	chr7:23313234-23313672				chr7:23313233-23313234;chr7:23313672-23313673		10.62	10	17.91	23.33	15.03	16.28	19.61	17.95	16.47	17.12	0.65	0.940003	1
K	intron_retention	ZRANB2	chr1	-	chr1:71532618-71534958				chr1:71532617-71532618;chr1:71534958-71534959		26.67	12.5	14.29	9.09	10.87	0	0	6.06	12.58	7.57	-5	0.779074	1
K	intron_retention	GGA2	chr16	-	chr16:23504780-23505623				chr16:23504779-23504780;chr16:23505623-23505624		5.88	15.38	9.92	5.71	8.23	0	7.35	18.75	7.79	10.54	2.75	0.873085	1
K	jcn_only_AA	FN1	chr2	-	chr2:216237024-216238044	chr2:216237099-216238044		chr2:216237024-216237098	chr2:216237023-216237024		70.66	75.56	67.24	86.11	81.36	72.73	74.15	74.77	72.41	75.16	2.76	0.390226	0.678877
K	intron_retention	CPSF3L	chr1	-	chr1:1249302-1249680				chr1:1249301-1249302;chr1:1249680-1249681		12.5	NA	15	0	0	0	0	0	6.25	0	-6.25	0.629122	1
K	jcn_only_AA	RBBP4	chr1	+	chr1:33116924-33117517	chr1:33116924-33117514		chr1:33117515-33117517	chr1:33117517-33117518		100	100	100	100	100	100	90.16	88.89	100	100	0	0.934629	0.967753
K	intron_retention	ARRDC1	chr9	+	chr9:140508222-140508483				chr9:140508221-140508222;chr9:140508483-140508484		0	0	0	5.88	0	0	18.18	0	0	0	0	0.845068	1
N	cassette	SUSD1	chr9	-	chr9:114905904-114919779	chr9:114905904-114911523;chr9:114911680-114919779		chr9:114911524-114911679			100	NA	100	100	100	90	100	100	100	100	0	0.42265	0.698148
K	intron_retention	DDX60L	chr4	-	chr4:169343061-169343674				chr4:169343060-169343061;chr4:169343674-169343675		23.81	15.15	8.11	31.88	20	29.75	6.25	26.04	14.05	27.89	13.84	0.336143	1
K	jcn_only_AD	EXOC1	chr4	+	chr4:56719964-56724479	chr4:56720120-56724479		chr4:56719964-56720119	chr4:56719963-56719964		84.21	100	100	79.41	78.12	100	72.73	82.76	81.16	91.38	10.22	0.433135	0.653546
K	alternative_acceptor	EWSR1	chr22	+	chr22:29684776-29687553	chr22:29684776-29687550		chr22:29687551-29687553	chr22:29687553-29687554		53.85	36.36	28.26	55.81	36.17	33.33	37.5	40	36.84	38.18	1.34	0.751861	0.946838
K	jcn_only_AD	NIPBL	chr5	+	chr5:37064081-37064628	chr5:37064122-37064628		chr5:37064081-37064121	chr5:37064080-37064081		NA	30	0	27.27	0	NA	0	0	0	27.27	27.27	0.18443	0.643086
K	jcn_only_AA	GIMAP6	chr7	-	chr7:150325377-150327145	chr7:150325601-150327145		chr7:150325377-150325600	chr7:150325376-150325377		83.33	78.57	88.89	77.78	80	75.68	85.11	71.6	84.22	76.73	-7.49	0.013768	0.678877
K	jcn_only_AD	ZRANB2	chr1	-	chr1:71530821-71532458	chr1:71530821-71531360					52.94	NA	61.9	28.57	43.75	65.38	33.33	39.29	48.34	39.29	-9.05	0.79317	0.917583
N	jcn_only_AA		chr1	+	chr1:145209437-145248820	chr1:145209437-145248812		chr1:145248813-145248820	chr1:145248820-145248821		100	100	83.33	100	35	100	100	100	91.66	100	8.34	0.276096	0.678877
K	alternative_donor	PAPD4	chr5	+	chr5:78908515-78908833;chr5:78908559-78908833	chr5:78908593-78908833		chr5:78908515-78908558;chr5:78908559-78908592	chr5:78908514-78908515;chr5:78908558-78908559		41.18	50	57.14	41.46	45.71	48.39	52.78	69.05	49.25	49.2	-0.05	0.6798	0.905711
K	alternative_last_exon	CTDSP1,PPP1R7	chr2	+	chr2:242105857-242109195	chr2:242105857-242106459	chr2:242109196-242109282	chr2:242106460-242106589			13.16	7.41	14.58	11.11	7.04	14.29	19.72	5.71	13.87	9.26	-4.61	0.267328	0.628581
K	jcn_only_AD	IKBKB	chr8	+	chr8:42151031-42162704	chr8:42151087-42162704		chr8:42151031-42151086	chr8:42151030-42151031		10.71	NA	0	0	5.26	15.79	0	0	2.63	0	-2.63	0.842259	0.94615
N	jcn_only_AA	PDHX	chr11	+	chr11:85989034-85995061	chr11:85989034-85989440		chr11:85989441-85995061	chr11:85995061-85995062		75	NA	100	100	100	100	100	81.25	100	100	0	1	1
K	intron_retention	ZNF438	chr10	-	chr10:31138373-31139150				chr10:31138372-31138373;chr10:31139150-31139151		88.24	NA	88.89	86.05	86.49	87.5	90.32	81.82	88.56	86.05	-2.52	0.326948	1
K	jcn_only_AA	ATP6V1G2-DDX39B,DDX39B	chr6	-	chr6:31508312-31509726	chr6:31508442-31509726		chr6:31508312-31508441	chr6:31508311-31508312		39.02	40.48	35.19	55.56	48.96	50	34.18	33.33	37.11	45.24	8.13	0.397473	0.678877
N	jcn_only_AD	TBC1D1	chr4	+	chr4:38055960-38091552	chr4:38078760-38091552		chr4:38055960-38078759	chr4:38055959-38055960		0	NA	0	0	0	0	0	8.82	0	0	0	0.42265	0.643086
K	alternative_acceptor	MAPKAPK2,THAP3	chr1	+	chr1:206905265-206905919	chr1:206905265-206905382		chr1:206905383-206905919	chr1:206905919-206905920		8.77	12.77	12.24	6.61	10	7.5	9.35	7.89	9.68	7.7	-1.98	0.419721	0.758651
K	alternative_acceptor	SUMO1	chr2	-	chr2:203079153-203084754	chr2:203079158-203084754		chr2:203079153-203079157	chr2:203079152-203079153		100	100	93.94	100	100	100	100	100	100	100	0	0.391002	0.758651
K	cassette	TP53BP2	chr1	-	chr1:224002056-224008921	chr1:224002056-224005907;chr1:224006040-224008921		chr1:224005908-224006039			NA	11.76	16.67	10.39	4.76	10	4.76	7.41	4.76	10.2	5.44	0.800272	0.923207
K	jcn_only_AA	GLRX	chr5	-	chr5:95150512-95152210;chr5:95150094-95152210	chr5:95150662-95152210		chr5:95150094-95150511;chr5:95150512-95150661	chr5:95150093-95150094;chr5:95150511-95150512		0	2.38	1.1	0.77	6.25	3.28	2.41	3.31	1.76	2.83	1.07	0.997474	1
K	cassette	TNFSF12-TNFSF13,TNFSF13	chr17	+	chr17:7463020-7463365	chr17:7463020-7463162;chr17:7463211-7463365		chr17:7463163-7463210			94	NA	90.76	84.11	89.59	95.65	93.1	90.74	91.93	90.74	-1.19	0.668707	0.863504
K	alternative_donor	CANT1,TRIM25	chr17	-	chr17:54985925-54990752	chr17:54985925-54986107		chr17:54986108-54990752	chr17:54990752-54990753		0	2	3.7	6.64	0	1.68	0	2.48	0	2.24	2.24	0.17815	0.747445
K	jcn_only_AA	CDK13	chr7	+	chr7:40127931-40132563	chr7:40127931-40132383		chr7:40132384-40132563	chr7:40132563-40132564		46.15	27.27	40	21.88	25	23.08	38.1	50	39.05	25.17	-13.88	0.432168	0.686011
K	cassette	CYB561A3	chr11	-	chr11:61124201-61129204	chr11:61124201-61125204;chr11:61125301-61129204		chr11:61125205-61125300			100	100	100	100	96	100	94.92	98.77	98	100	2	0.237404	0.698148
N	alternative_acceptor	RASSF4	chr10	+	chr10:45467297-45477968;chr10:45467297-45471759	chr10:45467297-45477972		chr10:45471760-45477968;chr10:45477969-45477972	chr10:45477968-45477969;chr10:45477972-45477973		0	2.03	3	7.39	0	0	5.26	3.74	1.5	2.88	1.38	0.567574	0.880581
K	alternative_donor	SRSF5	chr14	+	chr14:70234098-70234854;chr14:70233973-70234854	chr14:70233969-70234854		chr14:70233969-70233972;chr14:70233973-70234097	chr14:70233968-70233969;chr14:70233972-70233973		76.47	83.78	84.78	26.56	43.24	48.78	44.93	53.19	60.7	50.98	-9.72	0.581113	0.849828
K	intron_retention	KDM5C	chrX	-	chrX:53227820-53227945				chrX:53227819-53227820;chrX:53227945-53227946		10	6.25	0	6.98	0	0	5	2.7	2.5	4.47	1.97	0.434922	1
K	intron_retention	HARS2	chr5	+	chr5:140075787-140076105				chr5:140075786-140075787;chr5:140076105-140076106		0	0	0	0	11.76	23.08	11.11	0	5.55	0	-5.55	0.507589	1
K	jcn_only_AD	APTX,RALGDS	chr9	-	chr9:135979719-135981318	chr9:135979719-135979834					NA	18.18	7.14	NA	0	0	0	0	0	0	0	0.61692	0.813232
N	alternative_donor	CTSL	chr9	+	chr9:90342311-90342508;chr9:90341224-90342508;chr9:90341165-90342508;chr9:90342384-90342508;chr9:90341169-90342508	chr9:90341314-90342508		chr9:90341165-90341168;chr9:90341169-90341223;chr9:90341224-90341313;chr9:90341314-90342310;chr9:90342311-90342383	chr9:90341164-90341165;chr9:90341168-90341169;chr9:90341223-90341224;chr9:90341313-90341314;chr9:90342310-90342311		38.46	39.27	32.5	36.38	26.37	33.33	29.17	35.54	30.84	35.96	5.12	0.187712	0.747445
K	alternative_first_exon	NR3C1	chr5	-	chr5:142780418-142814096;chr5:142780418-142783940	chr5:142780418-142782775	chr5:142814097-142815077;chr5:142783941-142784109	chr5:142782776-142783265			NA	66.67	57.14	62.5	50	44	53.85	47.06	53.85	54.78	0.93	0.827465	0.910793
K	cassette	2019-09-15	chr1	-	chr1:87329289-87346344	chr1:87329289-87333735;chr1:87333786-87346344		chr1:87333736-87333785			94.31	91.67	98.48	94.34	96.86	87	96.05	88.39	96.45	90.03	-6.42	0.025938	0.675755
N	alternative_acceptor	ZNF710	chr15	+	chr15:90617523-90622891	chr15:90617523-90617853		chr15:90617854-90622891	chr15:90622891-90622892		27.27	23.08	20.59	13.51	19.15	8.82	24.32	10.64	22.45	12.07	-10.38	0.063202	0.758651
K	alternative_last_exon	EPHB2,SRP9	chr1	+	chr1:225971071-225976941	chr1:225971071-225974563	chr1:225976942-225978168	chr1:225974564-225974687			10.28	8.05	6.9	12.61	4.91	9.8	12.11	14.16	8.59	11.21	2.62	0.267673	0.628581
K	alternative_first_exon	RPS6KA1	chr1	+	chr1:26869713-26873357;chr1:26872527-26873357	chr1:26863461-26873357	chr1:26869603-26869712;chr1:26872343-26872526	chr1:26863416-26863460			15.69	10	13.56	16.67	28.21	0	17.86	12.5	16.77	11.25	-5.52	0.109427	0.324062
K	alternative_acceptor	IFNAR2,MX1	chr21	+	chr21:34602522-34614190	chr21:34602522-34614144		chr21:34614145-34614190	chr21:34614190-34614191		NA	38.89	35.29	48.84	40.54	46.77	36.59	47.37	36.59	47.07	10.48	0.033705	0.758651
K	intron_retention	C6orf48	chr6	+	chr6:31804295-31805012				chr6:31804294-31804295;chr6:31805012-31805013		0	0	10	22.22	20.69	0	6.9	9.52	8.45	4.76	-3.69	0.627335	1
K	alternative_acceptor	MAN2C1	chr15	-	chr15:75651767-75651960	chr15:75651780-75651960		chr15:75651767-75651779	chr15:75651766-75651767		20	NA	7.41	0	8.82	12.5	0	7.14	8.12	7.14	-0.98	0.666773	0.913345
K	alternative_last_exon	C1orf162,PRDM2	chr1	+	chr1:14109327-14142921	chr1:14109327-14113009	chr1:14142922-14143065	chr1:14113010-14114574			81.82	85.71	84.21	88.89	85.71	88.89	94.44	77.78	84.96	87.3	2.34	0.757674	0.883019
K	alternative_last_exon	SERINC5	chr5	-	chr5:79409449-79441912	chr5:79439634-79441912	chr5:79409395-79409448	chr5:79434550-79439633			90.32	100	95.95	90.91	98.28	72.73	100	100	97.12	95.45	-1.66	0.486785	0.733999
N	jcn_only_AD		chr2	-	chr2:114383307-114384457;chr2:114383307-114384054	chr2:114383307-114384614		chr2:114384055-114384457;chr2:114384458-114384614	chr2:114384457-114384458;chr2:114384614-114384615		41.18	83.33	51.11	58.33	54.1	NA	54.93	50	52.61	58.33	5.72	0.306945	0.643086
K	alternative_acceptor	DNPEP	chr2	-	chr2:220251671-220251791	chr2:220251703-220251791		chr2:220251671-220251702	chr2:220251670-220251671		NA	100	83.33	77.14	92.31	100	77.42	100	83.33	100	16.67	0.224867	0.758651
K	jcn_only_AD	RAP1B	chr12	+	chr12:69004824-69042478	chr12:69004833-69042478		chr12:69004824-69004832	chr12:69004823-69004824		6.67	26.15	26.61	30.73	27.63	36.81	27.56	29.05	27.09	29.89	2.8	0.200581	0.643086
N	jcn_only_AA		chr5	+	chr5:118513940-118525469	chr5:118513940-118525402		chr5:118525403-118525469	chr5:118525469-118525470		100	NA	100	89.29	100	100	100	92	100	92	-8	0.191936	0.678877
K	alternative_donor	CYB561A3,NUP98	chr11	-	chr11:3774639-3781768;chr11:3774639-3781792	chr11:3774639-3781717		chr11:3781718-3781768;chr11:3781769-3781792	chr11:3781768-3781769;chr11:3781792-3781793		NA	15.38	10.53	23.4	27.59	22.73	20	20	20	21.37	1.37	0.862758	0.957435
K	alternative_last_exon	HMGN3	chr6	-	chr6:79911444-79911992	chr6:79911873-79911992	chr6:79910962-79911443	chr6:79911780-79911872			34.48	31.03	19.35	6.67	7.69	12.12	9.68	16	14.52	14.06	-0.46	0.87279	0.925955
K	cassette	CHI3L1	chr1	-	chr1:203149006-203150289	chr1:203149006-203149597;chr1:203149781-203150289		chr1:203149598-203149780			94.26	100	100	100	100	100	95.51	95.63	97.75	100	2.25	0.462293	0.735016
N	intron_retention		chr2	+	chr2:192548120-192548454				chr2:192548119-192548120;chr2:192548454-192548455		100	100	100	100	100	90.35	100	100	100	100	0	0.629122	1
K	intron_retention	ZNF638	chr2	+	chr2:71655782-71658456				chr2:71655781-71655782;chr2:71658456-71658457		0	0	0	3.45	5.26	0	0	0	0	0	0	0.629122	1
K	cassette	P2RX7	chr12	+	chr12:121603991-121613190	chr12:121603991-121605290;chr12:121605428-121613190		chr12:121605291-121605427			100	100	92	100	100	100	100	100	100	100	0	0.391002	0.698148
K	jcn_only_AA	TLE4	chr9	+	chr9:82227634-82267504	chr9:82227634-82242288					100	NA	NA	100	100	100	87.5	100	100	100	0	0.42265	0.678877
N	jcn_only_AA	PDS5A	chr4	-	chr4:39929785-39978059	chr4:39933250-39978059		chr4:39929785-39933249	chr4:39929784-39929785		0	0	0	0	0	0	10.34	0	0	0	0	0.391002	0.678877
K	alternative_donor	CMTR1	chr6	+	chr6:37443189-37443901	chr6:37443693-37443901		chr6:37443189-37443692	chr6:37443188-37443189		NA	11.63	15	14.77	9.68	14.63	5.71	12.24	9.68	13.44	3.76	0.358498	0.747445
N	alternative_acceptor	ARL4A	chr7	+	chr7:143078503-143078652	chr7:143078503-143078649		chr7:143078650-143078652	chr7:143078652-143078653		48.15	NA	28.4	41.67	34.41	41.18	35.04	28.12	34.72	41.18	6.46	0.939145	0.978509
N	alternative_acceptor	CREM	chr10	+	chr10:35495980-35500583;chr10:35495980-35498239	chr10:35495980-35500181		chr10:35498240-35500181;chr10:35500182-35500583	chr10:35500181-35500182;chr10:35500583-35500584		87.3	92.31	84.78	80.68	85.42	88.89	90.48	83.95	86.36	86.42	0.06	0.86021	0.969307
K	jcn_only_AD	GPS1	chr17	+	chr17:80009841-80011149	chr17:80010336-80011149		chr17:80009841-80010335	chr17:80009840-80009841		0	NA	5.77	10.53	7.81	0	5.66	0	5.71	0	-5.71	0.760838	0.90072
N	jcn_only_AA	AGAP3	chr7	+	chr7:150825772-150831486	chr7:150825772-150827290		chr7:150827291-150831486	chr7:150831486-150831487		0	0	0	0	0	0	0	9.09	0	0	0	0.391002	0.678877
K	cassette	ENTPD6	chr20	+	chr20:25176504-25187711	chr20:25176504-25187157;chr20:25187227-25187711		chr20:25187158-25187226			45.45	NA	87.5	75	88.24	64.71	63.64	56.52	75.57	64.71	-10.86	0.641877	0.843528
K	intron_retention	STAT1	chr2	-	chr2:191839659-191840537				chr2:191839658-191839659;chr2:191840537-191840538		6.98	20.75	14.91	19.78	3.51	19.04	7.55	19.03	7.27	19.41	12.14	0.041356	1
K	alternative_acceptor	AMPD3,ILK	chr11	+	chr11:6625053-6625455	chr11:6625053-6625409		chr11:6625410-6625455	chr11:6625455-6625456		23.26	40.74	22.39	16.39	19.23	24.32	22.94	19.63	22.66	21.98	-0.69	0.586131	0.890148
N	alternative_donor	FCHO2	chr5	+	chr5:72364607-72370568	chr5:72366778-72370568		chr5:72364607-72366777	chr5:72364606-72364607		10.87	3.12	7.84	6.67	8.33	5.56	4.69	5.17	8.09	5.37	-2.72	0.116742	0.747445
K	intron_retention	TYMP	chr22	-	chr22:50965168-50965593				chr22:50965167-50965168;chr22:50965593-50965594		0	8.19	2.61	5.45	1.83	3.34	1.27	4.05	1.55	4.75	3.2	0.071622	1
K	intron_retention	ARAP1	chr11	-	chr11:72403831-72404369				chr11:72403830-72403831;chr11:72404369-72404370		20.59	14.29	12.82	23.26	7.89	12	12.5	18.33	12.66	16.31	3.65	0.906546	1
K	alternative_first_exon	PPP2R5C	chr14	+	chr14:102252521-102323022;chr14:102276374-102323022	chr14:102285423-102323022	chr14:102252355-102252520;chr14:102276140-102276373	chr14:102285329-102285422			0	5.26	1.89	0	2.22	0	0	0	0.94	0	-0.94	0.851503	0.92268
K	jcn_only_AD	CNOT4,HUS1	chr7	-	chr7:48018414-48019064	chr7:48018414-48019006		chr7:48019007-48019064	chr7:48019064-48019065		NA	NA	21.43	7.69	0	15.79	0	9.52	0	9.52	9.52	0.651738	0.834214
K	intron_retention	SLC35B3	chr6	-	chr6:8428292-8430096				chr6:8428291-8428292;chr6:8430096-8430097		NA	NA	22.22	0	0	0	0	0	0	0	0	0.666667	1
K	jcn_only_AD	AKIP1	chr11	+	chr11:8936478-8940883	chr11:8938915-8940883					100	100	100	100	94.12	100	100	100	100	100	0	0.391002	0.643086
K	alternative_acceptor	CD36,DBNL	chr7	+	chr7:80303464-80305699	chr7:80303464-80305423		chr7:80305424-80305699	chr7:80305699-80305700		6.4	3.85	12.5	8.33	3.85	0	3.75	3.33	5.12	3.59	-1.54	0.344747	0.758651
K	alternative_donor	MAP4,TNK2	chr3	-	chr3:47910818-47912347	chr3:47910818-47912302		chr3:47912303-47912347	chr3:47912347-47912348		100	100	100	93.33	100	100	87.18	100	100	100	0	0.689944	0.905711
K	cassette	STRAP	chr12	+	chr12:16035754-16042861	chr12:16035754-16036474;chr12:16036611-16042861		chr12:16036475-16036610			100	100	91.55	100	100	100	100	100	100	100	0	0.391002	0.698148
K	alternative_donor	CNOT1	chr16	-	chr16:58568300-58570892	chr16:58568300-58570871		chr16:58570872-58570892	chr16:58570892-58570893		0	19.05	13.46	0	4.94	0	8.33	0	6.63	0	-6.63	0.743408	0.92158
K	intron_retention	HNRNPH1	chr5	-	chr5:179050166-179050636				chr5:179050165-179050166;chr5:179050636-179050637		22.73	17.86	20.75	26.53	26.92	31.03	21.18	28.3	21.95	27.41	5.46	0.452298	1
N	alternative_acceptor		chr20	-	chr20:3687882-3693084;chr20:3687354-3693084	chr20:3687885-3693084		chr20:3687354-3687881;chr20:3687882-3687884	chr20:3687353-3687354;chr20:3687881-3687882		16.67	4.44	6.25	41.86	40.91	34.85	55.88	26.97	28.79	30.91	2.12	0.842561	0.969307
K	alternative_first_exon	LINC01578	chr15	+	chr15:93426417-93428744	chr15:93427009-93428744	chr15:93425937-93426416	chr15:93426815-93427008			71.43	69.23	68.75	60	54.55	66.67	NA	62.5	68.75	64.59	-4.16	0.960005	0.976628
K	jcn_only_AD	CDK11A,CSF3R	chr1	-	chr1:36939224-36939364	chr1:36939224-36939319		chr1:36939320-36939364	chr1:36939364-36939365		0	18.18	0	0	0	0	0	0	0	0	0	0.391002	0.643086
K	jcn_only_AD	HNRNPUL1	chr19	+	chr19:41770598-41774127	chr19:41770704-41774127		chr19:41770598-41770703	chr19:41770597-41770598		100	100	100	100	100	94.12	100	100	100	100	0	0.391002	0.643086
K	alternative_acceptor	RFXANK,SPHK2	chr19	+	chr19:19304943-19307774	chr19:19304943-19307771		chr19:19307772-19307774	chr19:19307774-19307775		36.36	21.43	23.33	31.25	20.69	16.67	29.03	29.63	26.18	25.53	-0.65	0.613006	0.893242
N	jcn_only_AA	TRAPPC10	chr21	+	chr21:45506842-45507579;chr21:45506842-45507702	chr21:45506842-45507584		chr21:45507580-45507584;chr21:45507585-45507702	chr21:45507584-45507585;chr21:45507702-45507703		NA	0	0	15.62	0	0	0	0	0	0	0	0.391002	0.678877
K	intron_retention	TMEM106A	chr17	+	chr17:41365065-41365208				chr17:41365064-41365065;chr17:41365208-41365209		100	87.5	100	100	100	100	94.44	100	100	100	0	0.666667	1
N	alternative_acceptor	MICAL1	chr6	-	chr6:109768644-109768883	chr6:109768781-109768883		chr6:109768644-109768780	chr6:109768643-109768644		10	9.09	8.16	7.5	4.88	6.98	6.06	7.89	7.11	7.7	0.59	0.654253	0.90738
K	cassette	SRSF6	chr20	+	chr20:42087150-42088410	chr20:42087150-42087792;chr20:42088061-42088410		chr20:42087793-42088060			73.68	86.36	58.33	74.07	46.48	57.69	37.14	68.97	52.41	71.52	19.11	0.124267	0.698148
N	alternative_donor	FGD2	chr6	+	chr6:36993715-36995204	chr6:36994102-36995204		chr6:36993715-36994101	chr6:36993714-36993715		8.33	5.56	2.7	7.26	2.27	7.89	2.33	7.14	2.52	7.2	4.68	0.127878	0.747445
K	alternative_donor	TXNRD1	chr12	+	chr12:104681210-104682708;chr12:104681125-104682708	chr12:104680888-104682708		chr12:104680888-104681124;chr12:104681125-104681209	chr12:104680887-104680888;chr12:104681124-104681125		58.62	55.56	67.54	56.25	66.1	63.89	70	70	66.82	60.07	-6.75	0.367351	0.747445
N	alternative_acceptor	TMEM165	chr4	+	chr4:159780411-159780746	chr4:159780411-159780729		chr4:159780730-159780746	chr4:159780746-159780747		NA	100	100	100	100	93.75	100	100	100	100	0	0.391002	0.758651
N	jcn_only_AA	SLC35C2	chr20	-	chr20:44980825-44983520	chr20:44980866-44983520		chr20:44980825-44980865	chr20:44980824-44980825		100	100	100	100	96.36	91.67	95.56	94.25	98.18	97.12	-1.06	0.562064	0.791343
K	jcn_only_AD	HSCB	chr22	+	chr22:29140693-29141851	chr22:29140698-29141851		chr22:29140693-29140697	chr22:29140692-29140693		NA	0	0	39.39	0	25	0	0	0	12.5	12.5	0.197198	0.643086
K	jcn_only_AD	TACC1	chr8	+	chr8:38646338-38677039	chr8:38663163-38677039		chr8:38646338-38663162	chr8:38646337-38646338		0	0	0	0	26.39	0	0	0	0	0	0	0.391002	0.643086
K	intron_retention	TPR	chr1	-	chr1:186325582-186326528				chr1:186325581-186325582;chr1:186326528-186326529		13.33	0	0	0	4.65	12.5	0	7.41	2.33	3.71	1.38	0.653618	1
K	alternative_last_exon	KLHL7,SRRT	chr7	+	chr7:23164792-23180387	chr7:23164792-23165379	chr7:23180388-23180563	chr7:23165380-23165664			18.18	NA	29.41	20	33.33	10	42.86	46.15	31.37	20	-11.37	0.673735	0.883019
K	alternative_acceptor	MCTP1	chr5	-	chr5:94040909-94044216	chr5:94043273-94044216		chr5:94040909-94043272	chr5:94040908-94040909		100	85	100	100	100	100	100	71.88	100	92.5	-7.5	0.209839	0.758651
K	cassette	ARHGAP27	chr17	-	chr17:43481463-43481810	chr17:43481463-43481634;chr17:43481701-43481810		chr17:43481635-43481700			NA	NA	63.64	68.63	100	71.11	48.28	71.88	63.64	71.11	7.47	0.995394	0.998106
K	cassette	HIF1A	chr14	+	chr14:62211532-62213651	chr14:62211532-62212408;chr14:62212536-62213651		chr14:62212409-62212535			93.49	97.26	97.04	96.95	91.98	95.6	95.63	95.5	94.56	96.28	1.72	0.213336	0.698148
K	jcn_only_AA	RNF216	chr7	-	chr7:5781276-5792476	chr7:5781447-5792476		chr7:5781276-5781446	chr7:5781275-5781276		30	28.57	31.82	57.89	50	53.33	25	27.78	30.91	40.95	10.04	0.460482	0.705073
N	jcn_only_AA	PDXDC1	chr16	+	chr16:15129411-15129872	chr16:15129411-15129807		chr16:15129808-15129872	chr16:15129872-15129873		0	NA	5.88	7.69	0	0	0	0	0	0	0	0.733905	0.880474
K	intron_retention	SPAG9	chr17	-	chr17:49052309-49053223				chr17:49052308-49052309;chr17:49053223-49053224		20	NA	35.71	36.67	37.5	20	24	53.33	29.86	36.67	6.82	0.996532	1
K	alternative_donor	MED4	chr13	-	chr13:48664555-48669195	chr13:48664555-48669089		chr13:48669090-48669195	chr13:48669195-48669196		NA	NA	100	82.35	60.87	81.82	38.89	50	60.87	81.82	20.95	0.831292	0.948095
K	jcn_only_AD	NHLRC3	chr13	+	chr13:39612603-39613272	chr13:39612861-39613272		chr13:39612603-39612860	chr13:39612602-39612603		83.33	100	92.31	100	100	100	100	100	96.16	100	3.84	0.222149	0.643086
K	intron_retention	ZRANB2	chr1	-	chr1:71535046-71536509				chr1:71535045-71535046;chr1:71536509-71536510		20	NA	18.42	0	7.41	8.33	13.16	21.88	15.79	8.33	-7.46	0.986462	1
K	intron_retention	SAMD9L	chr7	-	chr7:92765305-92774044				chr7:92765304-92765305;chr7:92774044-92774045		NA	5.45	0	3.66	0	4.27	0	5.29	0	4.78	4.78	0.136988	1
K	cassette	BLOC1S6	chr15	+	chr15:45879724-45895297	chr15:45879724-45884332;chr15:45884475-45895297		chr15:45884333-45884474			100	100	84.38	100	88.68	100	82.22	100	86.53	100	13.47	0.066604	0.698148
K	intron_retention	ENTPD6	chr20	+	chr20:25201970-25203473				chr20:25201969-25201970;chr20:25203473-25203474		NA	NA	12.9	25	0	5	10	11.76	10	11.76	1.76	0.795032	1
K	alternative_donor	CD37	chr19	+	chr19:49838833-49838970	chr19:49838867-49838970		chr19:49838833-49838866	chr19:49838832-49838833		92.86	78.57	89.32	100	92.71	86.49	91.34	87.8	92.03	87.14	-4.88	0.508415	0.816213
N	alternative_donor	TAOK3	chr12	-	chr12:118627747-118636855	chr12:118627747-118636828		chr12:118636829-118636855	chr12:118636855-118636856		0	6.25	0	3.7	4.65	3.85	0	0	0	3.78	3.78	0.236276	0.747445
K	jcn_only_AA	ANKHD1,ANKHD1-EIF4EBP3	chr5	+	chr5:139815843-139818045;chr5:139815843-139818087	chr5:139815843-139818078		chr5:139818046-139818078;chr5:139818079-139818087	chr5:139818078-139818079;chr5:139818087-139818088		25	0	9.09	0	0	0	13.51	8	11.3	0	-11.3	0.152288	0.678877
K	cassette	AKT2	chr19	-	chr19:40762962-40791087	chr19:40762962-40771165;chr19:40771259-40791087		chr19:40771166-40771258			100	100	100	70.83	80	100	86.96	89.29	93.48	94.65	1.17	0.847675	0.937302
K	jcn_only_AD	LILRB1	chr19	+	chr19:55144696-55145088	chr19:55144770-55145088		chr19:55144696-55144769	chr19:55144695-55144696		100	100	100	95.89	94.74	98.8	100	100	100	99.4	-0.6	0.994165	0.996118
K	intron_retention	BAG6	chr6	-	chr6:31611972-31612301				chr6:31611971-31611972;chr6:31612301-31612302		16.67	0	5.41	12	10	0	0	20	7.71	6	-1.71	0.992313	1
K	jcn_only_AA	ARHGAP5	chr14	+	chr14:32563593-32586348	chr14:32563593-32586345		chr14:32586346-32586348	chr14:32586348-32586349		81.82	87.5	NA	90	83.33	79.31	87.5	80	83.33	83.75	0.42	0.996618	1
K	cassette	STAU1	chr20	-	chr20:47770609-47804652	chr20:47770609-47790731;chr20:47790807-47804652		chr20:47790732-47790806			100	100	100	100	100	93.48	93.1	94.87	100	97.44	-2.56	0.641828	0.843528
K	jcn_only_AA	HPS1	chr10	-	chr10:100195530-100202880	chr10:100202715-100202880		chr10:100195530-100202714	chr10:100195529-100195530		17.19	0	12.1	0	0	0	11.11	0	11.61	0	-11.61	0.068439	0.678877
K	alternative_first_exon	CCRL2	chr3	+	chr3:46449273-46449558;chr3:46448994-46449558	chr3:46449186-46449558	chr3:46449247-46449272;chr3:46448654-46448993	chr3:46449049-46449185			0	8.33	0	18.67	0	23.61	0	22.73	0	20.7	20.7	0.013585	0.110082
K	alternative_acceptor	RMDN1	chr8	-	chr8:87487144-87489522	chr8:87487183-87489522		chr8:87487144-87487182	chr8:87487143-87487144		100	100	92.59	100	100	100	92.86	100	96.43	100	3.57	0.1818	0.758651
K	cassette	SMARCA2	chr9	+	chr9:2161904-2181570	chr9:2161904-2170418;chr9:2170473-2181570		chr9:2170419-2170472			15	9.09	15.79	NA	14.29	0	19.35	30.77	15.39	9.09	-6.3	0.787266	0.919767
K	jcn_only_AD	MRPL40	chr22	+	chr22:19420131-19420787	chr22:19420383-19420787		chr22:19420131-19420382	chr22:19420130-19420131		0	0	0	0	0	5.08	0	0	0	0	0	0.391002	0.643086
N	alternative_acceptor	PRPF18	chr10	+	chr10:97605354-97607325	chr10:97605354-97607202		chr10:97607203-97607325	chr10:97607325-97607326		85.71	100	86	100	90.22	100	88.3	92.96	87.15	100	12.85	0.003628	0.358408
N	jcn_only_AA	ARFRP1	chr20	-	chr20:62333251-62333487;chr20:62333253-62333487	chr20:62333248-62333487		chr20:62333248-62333250;chr20:62333251-62333252	chr20:62333247-62333248;chr20:62333250-62333251		0	10	0	0	0	0	0	0	0	0	0	0.391002	0.678877
K	jcn_only_AA	BSCL2,HNRNPUL2-BSCL2	chr11	-	chr11:62458340-62458546	chr11:62458346-62458546		chr11:62458340-62458345	chr11:62458339-62458340		14.63	0	6.86	7.69	2	0	2.19	7.08	4.53	3.54	-0.99	0.485678	0.729045
K	intron_retention	MMP19	chr12	-	chr12:56232519-56233279				chr12:56232518-56232519;chr12:56233279-56233280		3.45	0	0	5.1	3.92	7.14	0	3.82	1.73	4.46	2.73	0.81806	1
K	cassette	WIPI1	chr17	-	chr17:66447039-66453482	chr17:66447039-66449050;chr17:66449134-66453482		chr17:66449051-66449133			100	100	100	100	100	100	100	88.41	100	100	0	0.391002	0.698148
K	cassette	P4HA2	chr5	-	chr5:131554338-131563482	chr5:131554338-131562778;chr5:131562915-131563482		chr5:131562779-131562914			NA	40	45	43.48	21.43	28	20.83	30	21.43	35	13.57	0.528618	0.781386
N	cassette	RBM39	chr20	-	chr20:34297179-34302106	chr20:34297179-34300940;chr20:34301019-34302106		chr20:34300941-34301018			100	94.12	100	100	100	100	100	100	100	100	0	0.391002	0.698148
K	cassette	ARRB1	chr11	-	chr11:74980004-74983938	chr11:74980004-74982744;chr11:74982769-74983938		chr11:74982745-74982768			34.78	31.67	36.36	39.22	31.43	52.05	32.56	41.49	33.67	40.36	6.69	0.179739	0.698148
K	intron_retention	MMP19	chr12	-	chr12:56234667-56234889				chr12:56234666-56234667;chr12:56234889-56234890		13.04	0	5	2.97	0	2.67	0	1.43	2.5	2.05	-0.45	0.80309	1
K	intron_retention	BIN2	chr12	-	chr12:51678572-51681891				chr12:51678571-51678572;chr12:51681891-51681892		4.26	0	3.12	13.43	0	3.33	9.33	8.33	3.69	5.83	2.14	0.962941	1
K	jcn_only_AD	SSBP1	chr7	+	chr7:141438376-141438923;chr7:141438394-141438923;chr7:141438211-141438923	chr7:141438304-141438923		chr7:141438211-141438303;chr7:141438304-141438375;chr7:141438376-141438393	chr7:141438210-141438211;chr7:141438303-141438304;chr7:141438375-141438376		0	11.11	12.16	15.56	15.32	7.14	9.3	13.89	10.73	12.5	1.77	0.504527	0.724814
N	cassette	PIP5K1C	chr19	-	chr19:3641808-3643240	chr19:3641808-3642904;chr19:3642938-3643240		chr19:3642905-3642937			NA	NA	100	87.5	66.67	100	91.3	100	91.3	100	8.7	0.437155	0.71169
K	alternative_last_exon	N4BP2L1	chr13	-	chr13:32994714-33002040;chr13:33000093-33002040	chr13:32981910-33002040	chr13:32994508-32994713;chr13:32999495-33000092	chr13:32981782-32981909			92.86	84.62	63.64	75.9	70.59	86.57	90.91	83.13	80.75	83.88	3.12	0.712606	0.883019
K	intron_retention	RUNX1	chr21	-	chr21:36164908-36171597				chr21:36164907-36164908;chr21:36171597-36171598		NA	8.57	0	14.29	0	8.33	0	10.2	0	9.38	9.38	0.24224	1
K	alternative_donor	UBE4A	chr11	+	chr11:118243382-118243800	chr11:118243403-118243800		chr11:118243382-118243402	chr11:118243381-118243382		0	0	5.88	0	0	0	0	0	0	0	0	0.391002	0.747445
K	cassette	ARL8A	chr1	-	chr1:202104349-202104834	chr1:202104349-202104586;chr1:202104655-202104834		chr1:202104587-202104654			100	100	98.06	95.65	93.81	100	95.1	100	96.58	100	3.42	0.270223	0.698148
K	jcn_only_AA	SRRM1	chr1	+	chr1:24976578-24977989	chr1:24976578-24977899		chr1:24977900-24977989	chr1:24977989-24977990		NA	100	100	100	91.8	100	100	100	100	100	0	0.42265	0.678877
K	intron_retention	OSCAR	chr19	-	chr19:54600452-54603038				chr19:54600451-54600452;chr19:54603038-54603039		0	0	5.48	15.48	20	10.53	10	12.86	7.74	11.7	3.96	0.983411	1
K	intron_retention	TRA2B	chr3	-	chr3:185644523-185655612				chr3:185644522-185644523;chr3:185655612-185655613		25	0	0	0	6.12	0	3.6	4.26	4.86	0	-4.86	0.493546	1
K	jcn_only_AA	PCGF3,RBPJ	chr4	+	chr4:727579-728719	chr4:727579-727672		chr4:727673-728719	chr4:728719-728720		NA	NA	0	0	37.5	0	0	14.29	0	0	0	0.609765	0.819067
K	jcn_only_AD	IPO8,NEMP1	chr12	-	chr12:30837392-30843429	chr12:30837392-30839254					0	NA	0	18.18	0	0	0	0	0	0	0	0.42265	0.643086
K	intron_retention	DENND5A	chr11	-	chr11:9161402-9163486				chr11:9161401-9161402;chr11:9163486-9163487		0	7.94	0	2.94	0	0	0	2.83	0	2.88	2.88	0.355342	1
N	jcn_only_AD	CYTH1	chr17	-	chr17:76705815-76723739;chr17:76705815-76732773;chr17:76705815-76737821	chr17:76705815-76778283		chr17:76723740-76732773;chr17:76732774-76737821;chr17:76737822-76778283	chr17:76732773-76732774;chr17:76737821-76737822;chr17:76778283-76778284		69.23	76.19	100	69.12	100	75	68.57	72.97	84.62	73.98	-10.63	0.304683	0.643086
N	jcn_only_AD	GIMAP1-GIMAP5,GIMAP5	chr7	+	chr7:150434797-150437966;chr7:150437727-150437966	chr7:150437592-150437966		chr7:150434797-150437591;chr7:150437592-150437726	chr7:150434796-150434797;chr7:150437591-150437592		0	0	0	0	0	7.41	0	6.02	0	3.01	3.01	0.185082	0.643086
K	intron_retention	IDH3G	chrX	-	chrX:153051429-153051666				chrX:153051428-153051429;chrX:153051666-153051667		0	0	10.87	9.68	3.7	6.25	0	14.29	1.85	7.96	6.12	0.787643	1
K	intron_retention	UBR4	chr1	-	chr1:19431161-19431541				chr1:19431160-19431161;chr1:19431541-19431542		35.71	10	0	13.04	8.33	12	0	9.84	4.17	11	6.83	0.988703	1
K	alternative_first_exon	DYNC1I2	chr2	+	chr2:172544138-172546656	chr2:172544384-172546656	chr2:172543919-172544137	chr2:172544182-172544383			60.87	47.62	62.07	45.95	61.67	63.33	64.71	45.71	61.87	46.78	-15.09	0.068216	0.26718
K	cassette	CPPED1	chr16	-	chr16:12758973-12875041	chr16:12758973-12798480;chr16:12798907-12875041		chr16:12798481-12798906			94.12	100	100	94.25	93.33	100	91.15	91.43	93.72	97.12	3.4	0.559057	0.806018
K	jcn_only_AD	ZDHHC4	chr7	+	chr7:6617130-6618196	chr7:6617352-6618196		chr7:6617130-6617351	chr7:6617129-6617130		NA	NA	40	46.15	84.62	53.85	57.89	75	57.89	53.85	-4.04	0.881169	0.966443
K	jcn_only_AD	DENND5A	chr11	-	chr11:9161402-9163520;chr11:9161402-9163486	chr11:9161402-9161735					0	0	0	13.75	0	0	0	0	0	0	0	0.391002	0.643086
N	jcn_only_AA	PCNX	chr14	+	chr14:71514702-71517368	chr14:71514702-71515706		chr14:71515707-71517368	chr14:71517368-71517369		0	0	0	0	0	0	0	7.78	0	0	0	0.391002	0.678877
K	alternative_last_exon	ATP6V0A1,LUC7L3	chr17	+	chr17:48814388-48817666	chr17:48814388-48814647	chr17:48817667-48817706	chr17:48814648-48814840			21.21	18.75	11.11	15.79	11.76	10	16.67	7.14	14.21	12.89	-1.32	0.546597	0.766704
K	alternative_acceptor	EPB41L3	chr18	-	chr18:5419877-5423376	chr18:5419931-5423376		chr18:5419877-5419930	chr18:5419876-5419877		75.93	80.77	77.23	73.13	71.63	74.36	80.39	72.56	76.58	73.75	-2.84	0.692146	0.924146
K	intron_retention	TM4SF19,TM4SF19-TCTEX1D2	chr3	-	chr3:196053904-196054260				chr3:196053903-196053904;chr3:196054260-196054261		2.43	0	9.26	0	1.32	0	2.07	0	2.25	0	-2.25	0.236384	1
K	intron_retention		chr3	+	chr3:52549523-52550058				chr3:52549522-52549523;chr3:52550058-52550059		11.11	0	7.02	0	6.69	0	4.55	0	6.86	0	-6.86	0.038063	1
K	coord_cassette	ZNF655	chr7	+	chr7:99158319-99161485	chr7:99158319-99159510;chr7:99159597-99159990;chr7:99160118-99161485		chr7:99159511-99159596;chr7:99159991-99160117			100	100	92.31	100	100	100	79.17	100	96.16	100	3.84	0.242634	0.704416
K	alternative_first_exon	NCOA4	chr10	+	chr10:51573417-51579127;chr10:51576500-51579127;chr10:51572493-51579127	chr10:51565297-51579127	chr10:51576285-51576499;chr10:51572367-51572492	chr10:51565108-51565296			26.19	24.1	35.59	29.06	44.76	15.43	52.94	15.66	40.17	19.88	-20.29	0.038846	0.179012
K	alternative_acceptor	RP11-321N4.5,SYNCRIP	chr6	-	chr6:86322639-86324698	chr6:86322642-86324698		chr6:86322639-86322641	chr6:86322638-86322639		83.33	NA	78.57	72	68.09	72.22	82.46	70	80.51	72	-8.51	0.149889	0.758651
K	cassette	SIGLEC7	chr19	+	chr19:51646060-51648168	chr19:51646060-51647850;chr19:51647942-51648168		chr19:51647851-51647941			90.48	85.71	77.78	NA	89.83	100	84.44	85	87.13	85.71	-1.42	0.472081	0.744031
K	intron_retention	CEBPZ	chr2	-	chr2:37430009-37430092				chr2:37430008-37430009;chr2:37430092-37430093		21.74	21.43	43.48	18.75	21.43	11.11	22.58	15	22.16	16.88	-5.28	0.82196	1
K	jcn_only_AA	PTGES2	chr9	-	chr9:130886127-130886770	chr9:130886131-130886770		chr9:130886127-130886130	chr9:130886126-130886127		100	100	100	100	100	100	93.94	100	100	100	0	0.391002	0.678877
N	alternative_donor	GIMAP1-GIMAP5,GIMAP5	chr7	+	chr7:150437592-150437966;chr7:150434797-150437966	chr7:150437727-150437966		chr7:150434797-150437591;chr7:150437592-150437726	chr7:150434796-150434797;chr7:150437591-150437592		9.52	6.25	4.84	4.44	3.77	0.9	3.28	0.74	4.3	2.67	-1.63	0.293074	0.747445
K	cassette	ANKRD12	chr18	+	chr18:9195697-9208654	chr18:9195697-9204473;chr18:9204543-9208654		chr18:9204474-9204542			18.18	15.38	34.78	27.78	22.22	15	30	21.74	26.11	18.56	-7.55	0.239205	0.698148
K	alternative_acceptor	ZNF317	chr19	+	chr19:9269585-9273730	chr19:9269585-9270789		chr19:9270790-9273730	chr19:9273730-9273731		100	100	100	100	91.43	100	100	100	100	100	0	0.391002	0.758651
K	intron_retention	ACSL1	chr4	-	chr4:185689605-185691552				chr4:185689604-185689605;chr4:185691552-185691553		9.26	5	3.23	5.76	4.26	4.32	3.36	3.76	3.81	4.66	0.85	0.991865	1
N	cassette	PRDX5	chr11	+	chr11:64085859-64088336;chr11:64085859-64088132	chr11:64085859-64087205;chr11:64087341-64088132,chr11:64087341-64088336		chr11:64087206-64087340			96.88	100	100	100	91.58	96.3	100	100	98.44	100	1.56	0.418867	0.698148
K	jcn_only_AA	SYNRG	chr17	-	chr17:35880752-35896080	chr17:35889954-35896080					NA	0	0	0	0	0	0	6.9	0	0	0	0.391002	0.678877
K	cassette	VRK2	chr2	+	chr2:58373610-58386483	chr2:58373610-58381888;chr2:58381938-58386483		chr2:58381889-58381937			5.26	5.71	25	13.95	20.69	15.52	28	11.11	22.84	12.53	-10.31	0.210482	0.698148
K	alternative_acceptor	PRICKLE4,TOMM6	chr6	+	chr6:41757075-41757305	chr6:41757075-41757268		chr6:41757269-41757305	chr6:41757305-41757306		100	100	23.26	32.14	31.01	38.1	29.51	32.76	30.26	35.43	5.17	0.850863	0.969307
N	jcn_only_AA	TBC1D8	chr2	-	chr2:101670799-101675882	chr2:101670986-101675882		chr2:101670799-101670985	chr2:101670798-101670799		0	0	0	0	0	0	5.88	0	0	0	0	0.391002	0.678877
K	intron_retention	CSTF3	chr11	-	chr11:33163309-33163430				chr11:33163308-33163309;chr11:33163430-33163431		0	0	0	9.09	0	0	0	11.11	0	4.54	4.54	0.502885	1
N	jcn_only_AD	DMAP1	chr1	+	chr1:44680571-44683982	chr1:44683101-44683982		chr1:44680571-44683100	chr1:44680570-44680571		0	0	0	0	0	0	0	12.5	0	0	0	0.391002	0.643086
K	cassette	TPRA1	chr3	-	chr3:127294349-127294782	chr3:127294349-127294591;chr3:127294653-127294782		chr3:127294592-127294652			100	100	93.41	95.87	92.41	100	96.08	95.65	94.75	97.94	3.19	0.298082	0.698148
K	alternative_first_exon	MAPKAP1	chr9	-	chr9:128432187-128469249	chr9:128432187-128434594	chr9:128469250-128469513	chr9:128434595-128434922			92.75	96.43	92.45	89.74	95.54	97.06	94.06	90.91	93.41	93.67	0.27	0.938425	0.968702
K	cassette	CASP8	chr2	+	chr2:202137500-202139611	chr2:202137500-202137620;chr2:202137666-202139611		chr2:202137621-202137665			NA	NA	64.29	51.28	48	50	68.75	44.44	64.29	50	-14.29	0.195363	0.698148
N	jcn_only_AD	CSK	chr15	+	chr15:75075062-75090573	chr15:75076865-75090573		chr15:75075062-75076864	chr15:75075061-75075062		0	0	0	0	3.9	0	6.59	0	1.95	0	-1.95	0.201949	0.643086
K	cassette	ACADVL	chr17	+	chr17:7123517-7123922	chr17:7123517-7123782;chr17:7123849-7123922		chr17:7123783-7123848			100	100	100	93.41	98.1	100	100	100	100	100	0	0.536698	0.787067
K	jcn_only_AD	TM4SF19	chr3	-	chr3:196050869-196051145	chr3:196050869-196051141		chr3:196051142-196051145	chr3:196051145-196051146		91.76	91.94	100	86.54	91.84	100	92.33	85.37	92.09	89.24	-2.84	0.473563	0.696015
K	jcn_only_AD	DENND1A	chr9	-	chr9:126146193-126165680	chr9:126146193-126150008					NA	NA	0	0	5.41	0	0	0	0	0	0	0.42265	0.643086
K	cassette	PHF20L1	chr8	+	chr8:133811107-133816063	chr8:133811107-133811340;chr8:133811419-133816063		chr8:133811341-133811418			NA	NA	8.33	45.45	0	15.79	10	31.25	8.33	31.25	22.92	0.088443	0.698148
N	jcn_only_AD	TFPT	chr19	-	chr19:54613505-54617821	chr19:54613505-54617817		chr19:54617818-54617821	chr19:54617821-54617822		41.18	0	0	30.23	12.7	9.52	16.13	0	14.41	4.76	-9.65	0.524893	0.743598
N	jcn_only_AD	FMNL2	chr2	+	chr2:153502042-153504309;chr2:153501995-153504309	chr2:153497429-153504309		chr2:153497429-153501994;chr2:153501995-153502041	chr2:153497428-153497429;chr2:153501994-153501995		NA	24.39	34.21	17.86	12.5	100	100	12.5	34.21	21.12	-13.09	0.774414	0.907934
K	intron_retention	GLG1	chr16	-	chr16:74514173-74530526				chr16:74514172-74514173;chr16:74530526-74530527		95.83	88.24	100	93.75	97.78	100	100	100	98.89	96.88	-2.02	0.855854	1
K	cassette	VRK3	chr19	-	chr19:50511084-50519280	chr19:50511084-50512492;chr19:50512643-50519280		chr19:50512493-50512642			100	89.47	100	100	88.46	100	88.46	92.59	94.23	96.3	2.07	0.773943	0.912978
K	cassette	TLE4	chr9	+	chr9:82321815-82323032	chr9:82321815-82322037;chr9:82322134-82323032		chr9:82322038-82322133			9.09	8.33	0	18.37	5.88	23.33	9.09	8.89	7.48	13.63	6.15	0.097958	0.698148
K	cassette	DNM2	chr19	+	chr19:10916644-10922939	chr19:10916644-10919244;chr19:10919257-10922939		chr19:10919245-10919256			82.19	79.07	56.9	63.64	67.6	63.1	66	72.28	66.8	67.96	1.16	0.842383	0.93475
K	intron_retention	FOXN2	chr2	+	chr2:48589847-48600430				chr2:48589846-48589847;chr2:48600430-48600431		NA	0	0	6.33	0	0	0	0	0	0	0	0.629122	1
K	intron_retention	ZDHHC7	chr16	-	chr16:85015601-85023909				chr16:85015600-85015601;chr16:85023909-85023910		4.35	12.5	7.35	0	5.97	0	6.25	10	6.11	5	-1.11	0.662734	1
K	jcn_only_AD	BECN1	chr17	-	chr17:40975898-40976172	chr17:40975898-40976150		chr17:40976151-40976172	chr17:40976172-40976173		50	50	44.12	24	31.43	37.5	43.33	47.22	43.72	42.36	-1.36	0.732644	0.877855
K	cassette	MRPL33	chr2	+	chr2:27995560-28002299	chr2:27995560-27997290;chr2:27997398-28002299		chr2:27997291-27997397			75	73.68	60.71	72.34	80	77.78	75.44	82.5	75.22	75.73	0.51	0.465486	0.737724
K	jcn_only_AA	NISCH,VPS8	chr3	+	chr3:184603945-184612490	chr3:184603945-184611021					NA	0	0	33.33	17.86	NA	0	0	0	0	0	0.709403	0.870448
N	jcn_only_AD	LRRC41	chr1	-	chr1:46764043-46768795	chr1:46764043-46768434		chr1:46768435-46768795	chr1:46768795-46768796		0	0	5.88	0	0	0	0	0	0	0	0	0.391002	0.643086
K	cassette	ABI1	chr10	-	chr10:27040713-27047990;chr10:27040713-27054146	chr10:27040713-27044583;chr10:27044671-27047990,chr10:27044671-27054146		chr10:27044584-27044670			5.56	13.24	8.79	14.11	4.49	4	2.54	2.65	5.03	8.62	3.6	0.389092	0.698148
K	alternative_donor	MATR3	chr5	+	chr5:138629495-138642927	chr5:138629718-138642927		chr5:138629495-138629717	chr5:138629494-138629495		3.7	9.09	5.88	0	0	5.26	4.26	3.57	3.98	4.42	0.44	0.669977	0.905711
K	intron_retention	RABGGTB	chr1	+	chr1:76257992-76259768				chr1:76257991-76257992;chr1:76259768-76259769		0	0	13.46	7.41	3.7	0	3.85	0	3.78	0	-3.78	0.617773	1
K	intron_retention	UBE2E1	chr3	+	chr3:23930751-23931999				chr3:23930750-23930751;chr3:23931999-23932000		0	5.26	1.71	2.86	1.34	2.24	0	2.69	0.67	2.77	2.1	0.222281	1
K	jcn_only_AD	C7orf49	chr7	-	chr7:134852560-134853537;chr7:134852560-134853500	chr7:134852560-134853720		chr7:134853501-134853537;chr7:134853538-134853720	chr7:134853537-134853538;chr7:134853720-134853721		NA	NA	13.89	26.09	3.92	25	13.64	0	13.64	25	11.36	0.532773	0.746377
K	intron_retention	PRKCSH	chr19	+	chr19:11558413-11558507				chr19:11558412-11558413;chr19:11558507-11558508		0	NA	6.06	7.14	0	9.09	11.11	0	3.03	7.14	4.11	0.625529	1
K	intron_retention	FGD2	chr6	+	chr6:36989381-36990014				chr6:36989380-36989381;chr6:36990014-36990015		0	0	0	5.59	5.71	0	13.16	0	2.85	0	-2.85	0.71082	1
K	intron_retention	SF3B1	chr2	-	chr2:198283313-198285151				chr2:198283312-198283313;chr2:198285151-198285152		36.36	32.65	15.56	25	12.5	22.39	15.38	10.99	15.47	23.7	8.22	0.923836	1
K	alternative_acceptor	PSMA3	chr14	+	chr14:58724717-58727686	chr14:58724717-58727665		chr14:58727666-58727686	chr14:58727686-58727687		100	100	81.16	83.96	85.9	82.11	83.33	100	84.62	91.98	7.36	0.568567	0.880586
K	jcn_only_AA	BABAM1,CTD-2278I10.6	chr19	+	chr19:17378337-17379602	chr19:17378337-17379564		chr19:17379565-17379602	chr19:17379602-17379603		52.94	33.33	17.02	18.18	15.69	34.62	15.25	13.16	16.36	25.75	9.4	0.971504	0.988978
K	intron_retention	AP1G2	chr14	-	chr14:24029060-24029146				chr14:24029059-24029060;chr14:24029146-24029147		25	0	0	10.26	0	8.33	21.43	9.68	10.71	9	-1.71	0.767718	1
N	alternative_donor	EIF3K	chr19	+	chr19:39109968-39110976;chr19:39109943-39110976	chr19:39109958-39110976		chr19:39109943-39109957;chr19:39109958-39109967	chr19:39109942-39109943;chr19:39109957-39109958		0	NA	0	0	5.49	0	0	12	0	0	0	0.586823	0.850494
K	cassette	SPIN1	chr9	+	chr9:91063905-91083286	chr9:91063905-91077410;chr9:91077665-91083286		chr9:91077411-91077664			100	NA	100	100	100	100	100	87.5	100	100	0	0.42265	0.698148
N	jcn_only_AD	SNX13	chr7	-	chr7:17836563-17838312	chr7:17836563-17838281		chr7:17838282-17838312	chr7:17838312-17838313		0	NA	0	13.33	0	0	0	0	0	0	0	0.42265	0.643086
K	cassette	HNRNPH1	chr5	-	chr5:179041961-179043126	chr5:179041961-179042546;chr5:179042597-179043126		chr5:179042547-179042596			100	84.09	93.85	85	100	81.58	100	84.15	100	84.12	-15.88	0.000695	0.327544
N	jcn_only_AD	CCDC14	chr3	-	chr3:49153596-49153723	chr3:49153596-49153712		chr3:49153713-49153723	chr3:49153723-49153724		100	100	100	100	100	100	100	93.33	100	100	0	0.391002	0.643086
K	alternative_last_exon	INPP4A,NRP2	chr2	+	chr2:206631528-206656958	chr2:206631528-206640969	chr2:206656959-206657009	chr2:206640970-206644438			49.25	60	56.34	62.89	64.17	53.79	54.44	54.37	55.39	57.19	1.8	0.669809	0.883019
K	cassette	RBM23	chr14	-	chr14:23377590-23380536	chr14:23377590-23378691;chr14:23378805-23380536		chr14:23378692-23378804			100	100	100	100	94.44	100	100	100	100	100	0	0.391002	0.698148
N	alternative_acceptor	CHI3L2	chr1	+	chr1:24018320-24019101	chr1:24018320-24019098		chr1:24019099-24019101	chr1:24019101-24019102		100	36.36	66.23	75.86	76.92	84.62	81.36	76.19	79.14	76.03	-3.11	0.363465	0.758651
K	cassette	MED15	chr22	+	chr22:20922919-20936897	chr22:20922919-20929399;chr22:20929520-20936897		chr22:20929400-20929519			81.82	61.76	60	59.09	45.45	51.22	57.14	80	58.57	60.42	1.85	0.850745	0.939997
N	alternative_acceptor	SELO	chr22	+	chr22:50640020-50644745	chr22:50640020-50640314		chr22:50640315-50644745	chr22:50644745-50644746		NA	NA	41.67	55	25	50	33.33	52.38	33.33	52.38	19.05	0.048025	0.758651
K	cassette	DENND1A	chr9	-	chr9:126202771-126214554	chr9:126202771-126212971;chr9:126213029-126214554		chr9:126212972-126213028			NA	80	100	100	100	100	100	100	100	100	0	0.391002	0.698148
N	jcn_only_AD	SRGAP2	chr1	+	chr1:206603573-206610314	chr1:206608252-206610314		chr1:206603573-206608251	chr1:206603572-206603573		0	0	0	0	0	7.14	0	0	0	0	0	0.391002	0.643086
K	cassette	PICALM	chr11	-	chr11:85695017-85707868	chr11:85695017-85701292;chr11:85701443-85707868		chr11:85701293-85701442			9.62	7.84	4.84	8.15	10.27	9.24	10.26	8.93	9.94	8.54	-1.4	0.886718	0.956085
K	cassette	RPAIN	chr17	+	chr17:5326150-5329555	chr17:5326150-5329290;chr17:5329403-5329555		chr17:5329291-5329402			NA	NA	82.35	72.22	82.35	62.5	68.42	100	82.35	72.22	-10.13	0.968086	0.986879
K	alternative_acceptor	WAC	chr10	+	chr10:28897361-28899639	chr10:28897361-28899627		chr10:28899628-28899639	chr10:28899639-28899640		100	100	100	95	100	100	100	100	100	100	0	0.391002	0.758651
K	jcn_only_AA	PLA2G15	chr16	+	chr16:68289284-68289793	chr16:68289284-68289668		chr16:68289669-68289793	chr16:68289793-68289794		100	100	88.68	NA	100	100	100	100	100	100	0	0.391002	0.678877
N	alternative_donor	DDX17	chr22	-	chr22:19164008-19164094	chr22:19164008-19164090		chr22:19164091-19164094	chr22:19164094-19164095		100	100	100	100	100	92.31	100	100	100	100	0	0.391002	0.747445
K	alternative_donor	POLD4	chr11	-	chr11:67120549-67120834;chr11:67120549-67120764;chr11:67120549-67120773	chr11:67120549-67121009		chr11:67120765-67120773;chr11:67120774-67120834;chr11:67120835-67121009	chr11:67120773-67120774;chr11:67120834-67120835;chr11:67121009-67121010		0	0	2.6	5.13	2.74	0	10.96	0	2.67	0	-2.67	0.352779	0.747445
K	jcn_only_AA	PSMC4	chr19	+	chr19:40478152-40478368	chr19:40478152-40478275		chr19:40478276-40478368	chr19:40478368-40478369		100	100	100	94.74	100	100	94.51	100	100	100	0	0.97685	0.991434
K	alternative_acceptor	HCK	chr20	+	chr20:30661165-30661521	chr20:30661165-30661518		chr20:30661519-30661521	chr20:30661521-30661522		76.32	72.16	70.07	72.2	71.43	68.26	73.33	74.9	72.38	72.18	-0.2	0.65377	0.90738
K	jcn_only_AD	MRPL11	chr11	-	chr11:66205731-66206180	chr11:66205731-66206102		chr11:66206103-66206180	chr11:66206180-66206181		86.67	100	76.67	86.67	89.58	100	94.64	NA	88.12	100	11.88	0.205276	0.643086
N	jcn_only_AA	CSF3R	chr1	-	chr1:36945118-36947078	chr1:36945848-36947078		chr1:36945118-36945847	chr1:36945117-36945118		0	0	0	0	0	19.61	0	0	0	0	0	0.391002	0.678877
K	alternative_last_exon	CIRBP,ZNF557	chr19	+	chr19:1272051-1274305	chr19:1272051-1272425	chr19:1274306-1274809	chr19:1272426-1273171			89.26	92.65	88.31	89.17	90.66	93.84	92.86	90.64	89.96	91.65	1.69	0.398723	0.720364
K	alternative_acceptor	DLST	chr14	+	chr14:75355851-75355979	chr14:75355851-75355977		chr14:75355978-75355979	chr14:75355979-75355980		100	100	100	100	89.36	100	100	100	100	100	0	0.391002	0.758651
K	intron_retention	ABCC3	chr17	+	chr17:48735858-48736597				chr17:48735857-48735858;chr17:48736597-48736598		0	NA	4.88	8	0	25	0	0	0	8	8	0.560587	1
K	intron_retention	DOK1	chr2	+	chr2:74782796-74783020				chr2:74782795-74782796;chr2:74783020-74783021		0	0	7.14	0	6.9	6.67	18.75	5.71	7.02	2.85	-4.16	0.708841	1
K	cassette	BID	chr22	-	chr22:18226780-18257146	chr22:18226780-18232870;chr22:18232941-18257146		chr22:18232871-18232940			100	100	100	100	100	100	95	100	100	100	0	0.391002	0.698148
K	jcn_only_AD	C1orf122	chr1	+	chr1:38273979-38274202	chr1:38274112-38274202		chr1:38273979-38274111	chr1:38273978-38273979		NA	33.33	5.88	15.52	25	44.78	11.76	35.9	11.76	34.61	22.85	0.082101	0.643086
K	cassette	KANSL3	chr2	-	chr2:97271249-97274244	chr2:97271249-97272706;chr2:97272785-97274244		chr2:97272707-97272784			4.76	0	0	5.71	7.69	5.88	0	0	2.38	2.85	0.48	0.93501	0.975214
K	cassette	COPZ1	chr12	+	chr12:54718966-54735989	chr12:54718966-54734330;chr12:54734400-54735989		chr12:54734331-54734399			95.83	100	94.32	100	100	100	98.29	100	97.06	100	2.94	0.106277	0.698148
N	jcn_only_AD	VDAC3	chr8	+	chr8:42252652-42256229	chr8:42252655-42256229		chr8:42252652-42252654	chr8:42252651-42252652		0	0	2.27	0	3.7	0	5.76	0	2.99	0	-2.99	0.094177	0.643086
K	intron_retention	TOR1A	chr9	-	chr9:132576502-132580798				chr9:132576501-132576502;chr9:132580798-132580799		0	7.69	0	7.58	2.94	2.67	0	2.33	0	5.12	5.12	0.331121	1
K	cassette	HNRNPR	chr1	-	chr1:23648157-23660010	chr1:23648157-23650048;chr1:23650226-23660010		chr1:23650049-23650225			100	100	94.55	100	100	100	100	100	100	100	0	0.391002	0.698148
K	intron_retention	NUP50	chr22	+	chr22:45571962-45574118				chr22:45571961-45571962;chr22:45574118-45574119		10.53	0	0	0	5	9.09	0	10.81	2.5	4.54	2.04	0.843511	1
K	alternative_donor	PCMT1	chr6	+	chr6:150123506-150131751	chr6:150123553-150131751		chr6:150123506-150123552	chr6:150123505-150123506		45.45	54.55	43.33	46.59	43.28	58.54	46.43	35.94	44.39	50.57	6.18	0.455719	0.773538
N	jcn_only_AD		chr1	-	chr1:54394114-54395748	chr1:54394114-54395711		chr1:54395712-54395748	chr1:54395748-54395749		100	100	94.44	100	100	100	100	100	100	100	0	0.391002	0.643086
K	intron_retention	2019-03-07	chr2	+	chr2:160621186-160623794				chr2:160621185-160621186;chr2:160623794-160623795		0	0	24.24	10.17	14.63	9.09	6.67	11.29	10.65	9.63	-1.02	0.814577	1
K	intron_retention	LST1	chr6	+	chr6:31555096-31555720				chr6:31555095-31555096;chr6:31555720-31555721		28	0	9.09	10.53	6.85	41.67	5.56	0	7.97	5.26	-2.71	0.996613	1
K	cassette	IKBKB	chr8	+	chr8:42176940-42178252	chr8:42176940-42177102;chr8:42177165-42178252		chr8:42177103-42177164			100	100	100	100	87.5	100	100	100	100	100	0	0.391002	0.698148
N	jcn_only_AA	PRPF40A	chr2	-	chr2:153520482-153520651	chr2:153520494-153520651		chr2:153520482-153520493	chr2:153520481-153520482		13.64	NA	0	0	13.79	0	0	0	6.82	0	-6.82	0.1817	0.678877
[truncated: 7,627 more rows]

## Sheet: DRIMSeq AFE Unfiltered
	feature_id	gene_id	accepted_hits_6_ctl	accepted_hits_8_lps	accepted_hits_20_ctl	accepted_hits_22_lps	accepted_hits_34_ctl	accepted_hits_36_lps	accepted_hits_48_ctl	accepted_hits_50_lps	ctl_med	lps_med	deltaPSI	lr	df	pvalue	adj_pvalue
[truncated: 434 more rows]

[truncated: 1 more sheets: DRIMSeq All Events Filtered]
