# Supplementary material for: Inflammation drives alternative first exon usage to regulate immune genes including a novel iron-regulated isoform of Aim2
Source: eLife journal article supplement (doi:10.7554/elife.69431), 2021-05-28
Supplement: supp [file elife-69431-supp-v1.zip]

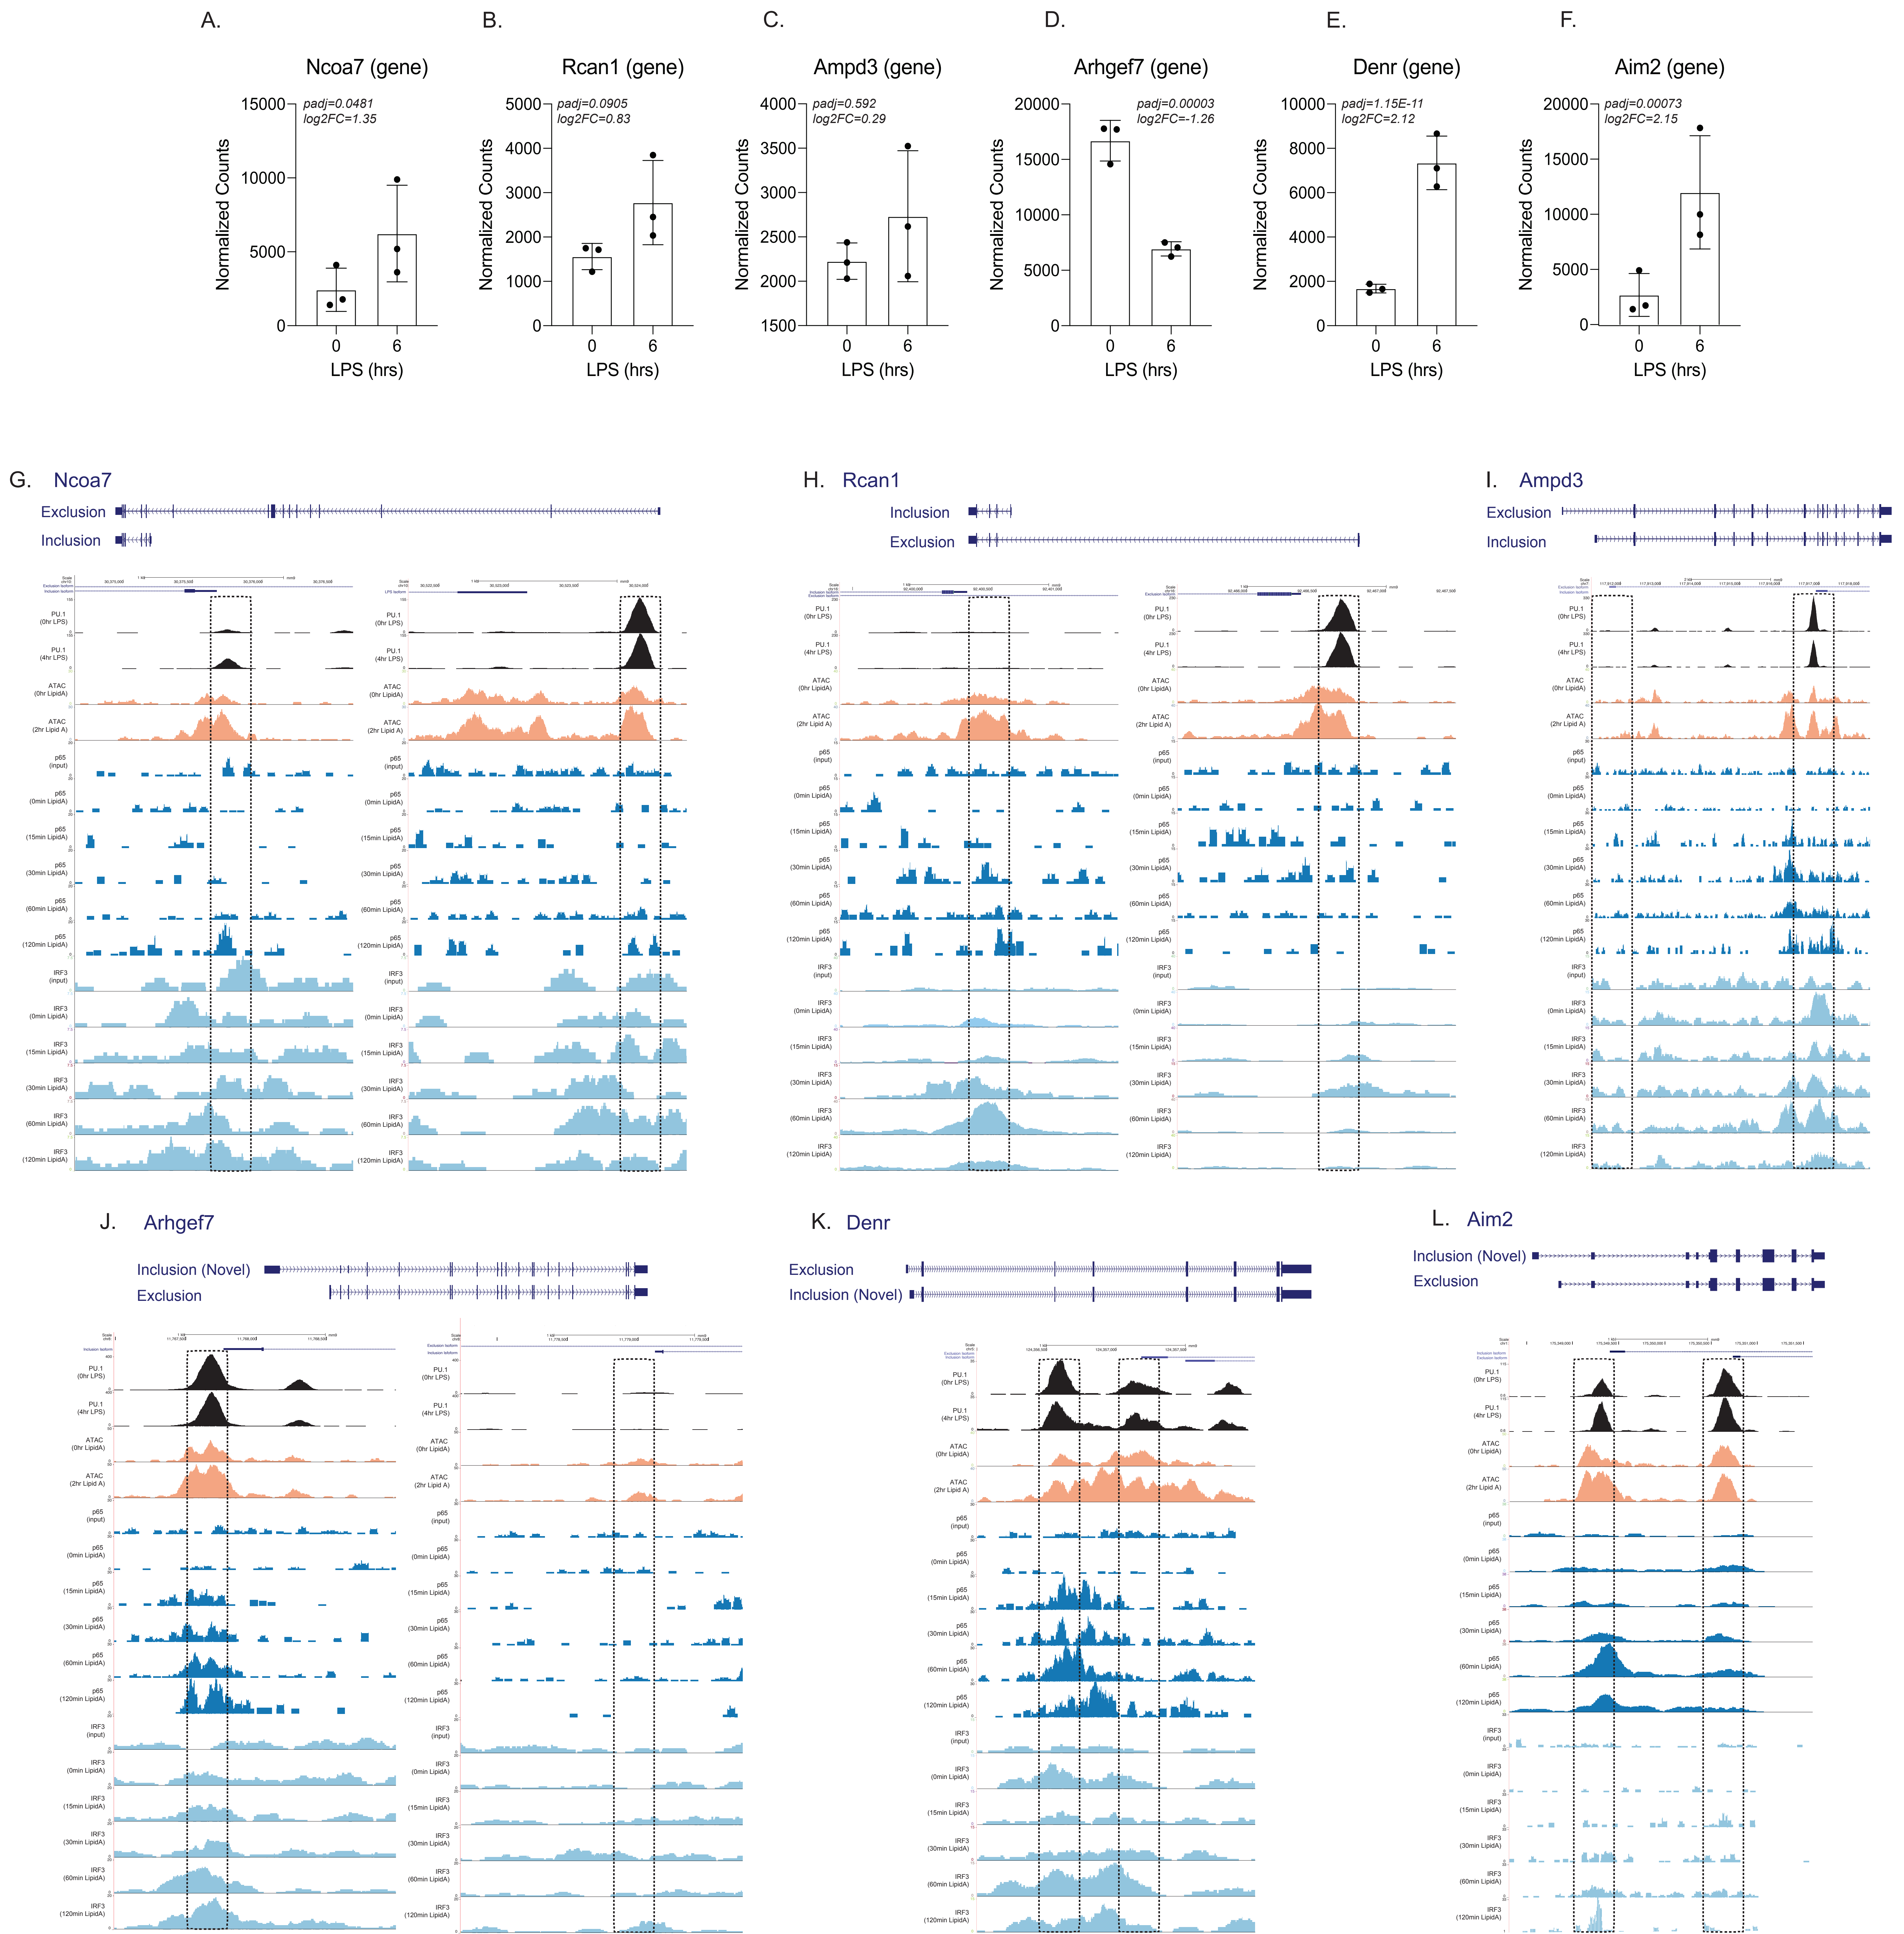

**Figure 3 - Supplemental Figure 11: Genome Browser images of ChIP-seq and ATAC-seq for both the promoters of CTL and LPS specific AFE isoforms.** The normalized counts and DESeq2 analysis of of Ncoa7 (A), Rcan1 (B), Ampd3 (C), Arhgef7 (D), Denr (E) and Aim2 (F) are represented in a bar graph in triplicate. Genome browser images are taken for the CTL and LPS promoters highlighted in yellow of Ncoa7 (G), Rcan1 (H), Ampd3 (I), Arhgef7 (J), Denr (K), and Aim2 (L). All tracks are next-generation sequencing data from BMDMs. The top track (in black) is ChIP-sequencing data of PU.1 from unstimulated cells, while the second track is PU.1 ChIP-seq data from LPS stimulated cells (GSE109965). The next two tracks (in orange) are of ATAC sequencing data from either unstimulated or LPS stimulated cells (GSE74191). The next five tracks (dark blue) are p65 ChIP-sequencing data from the input, 0min KLA, 15min KLA, 30min KLA, 60min KLA or 120min KLA stimulation (GSE67343). Finally the last five tracks (in light blue) are IRF3 ChIP-sequencing data from the input, 0min KLA, 15min KLA, 30min KLA, 60min KLA or 120min KLA stimulation (GSE67343).
