# Supplementary material for: Inflammation drives alternative first exon usage to regulate immune genes including a novel iron-regulated isoform of Aim2
Source: eLife journal article supplement (doi:10.7554/elife.69431), 2021-05-28
Supplement: supp [file elife-69431-supp-v1.zip]

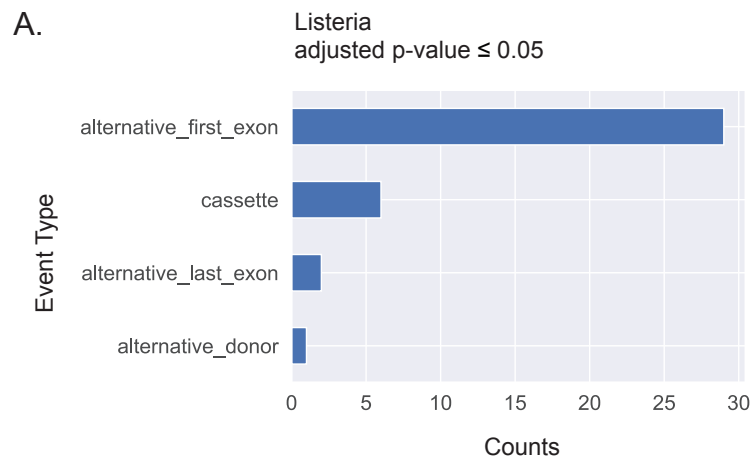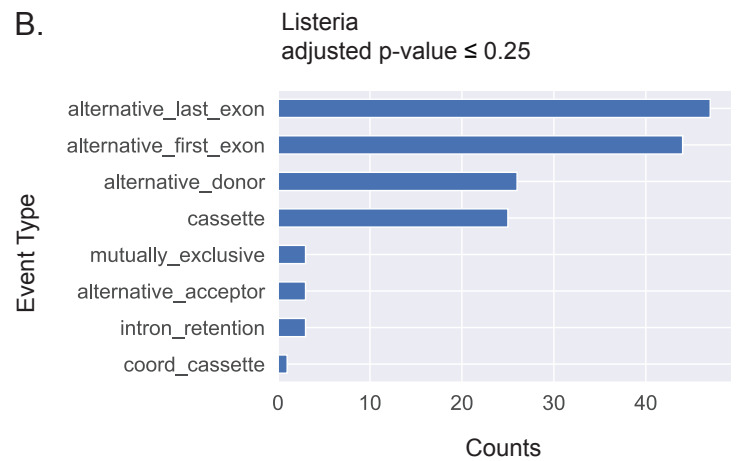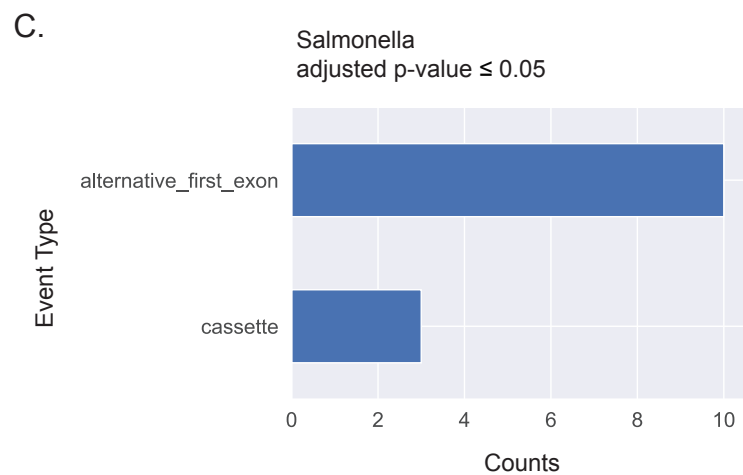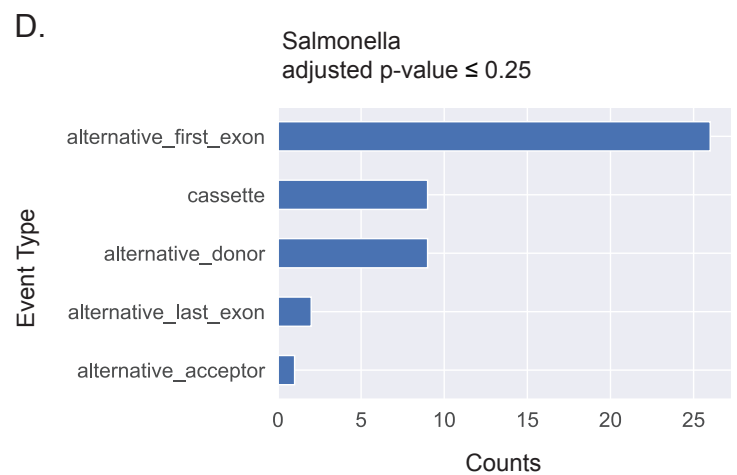

**Figure 1 - Supplemental Figure 4: Alternative First Exon usage is the top splicing event when using JuncBASE to identify and quantify alternative splicing events from primary human macrophages stimulated with *Listeria* and *Salmonella* for 24hrs.** Significant alternative splicing events identified and categorized by event type using an adjusted p-value cutoff  $\leq 0.05$  (A) and a cutoff of  $\leq 0.25$  (B) following *Listeria* infection. Significant alternative splicing events identified and categorized by event type using an adjusted p-value cutoff of  $\leq 0.05$  (C) and a cutoff of  $\leq 0.25$  (D) following *Salmonella* infection. Data acquired from GSE73502.
