# Supplementary material for: Inflammation drives alternative first exon usage to regulate immune genes including a novel iron-regulated isoform of Aim2
Source: eLife journal article supplement (doi:10.7554/elife.69431), 2021-05-28
Supplement: supp [file elife-69431-supp-v1.zip]

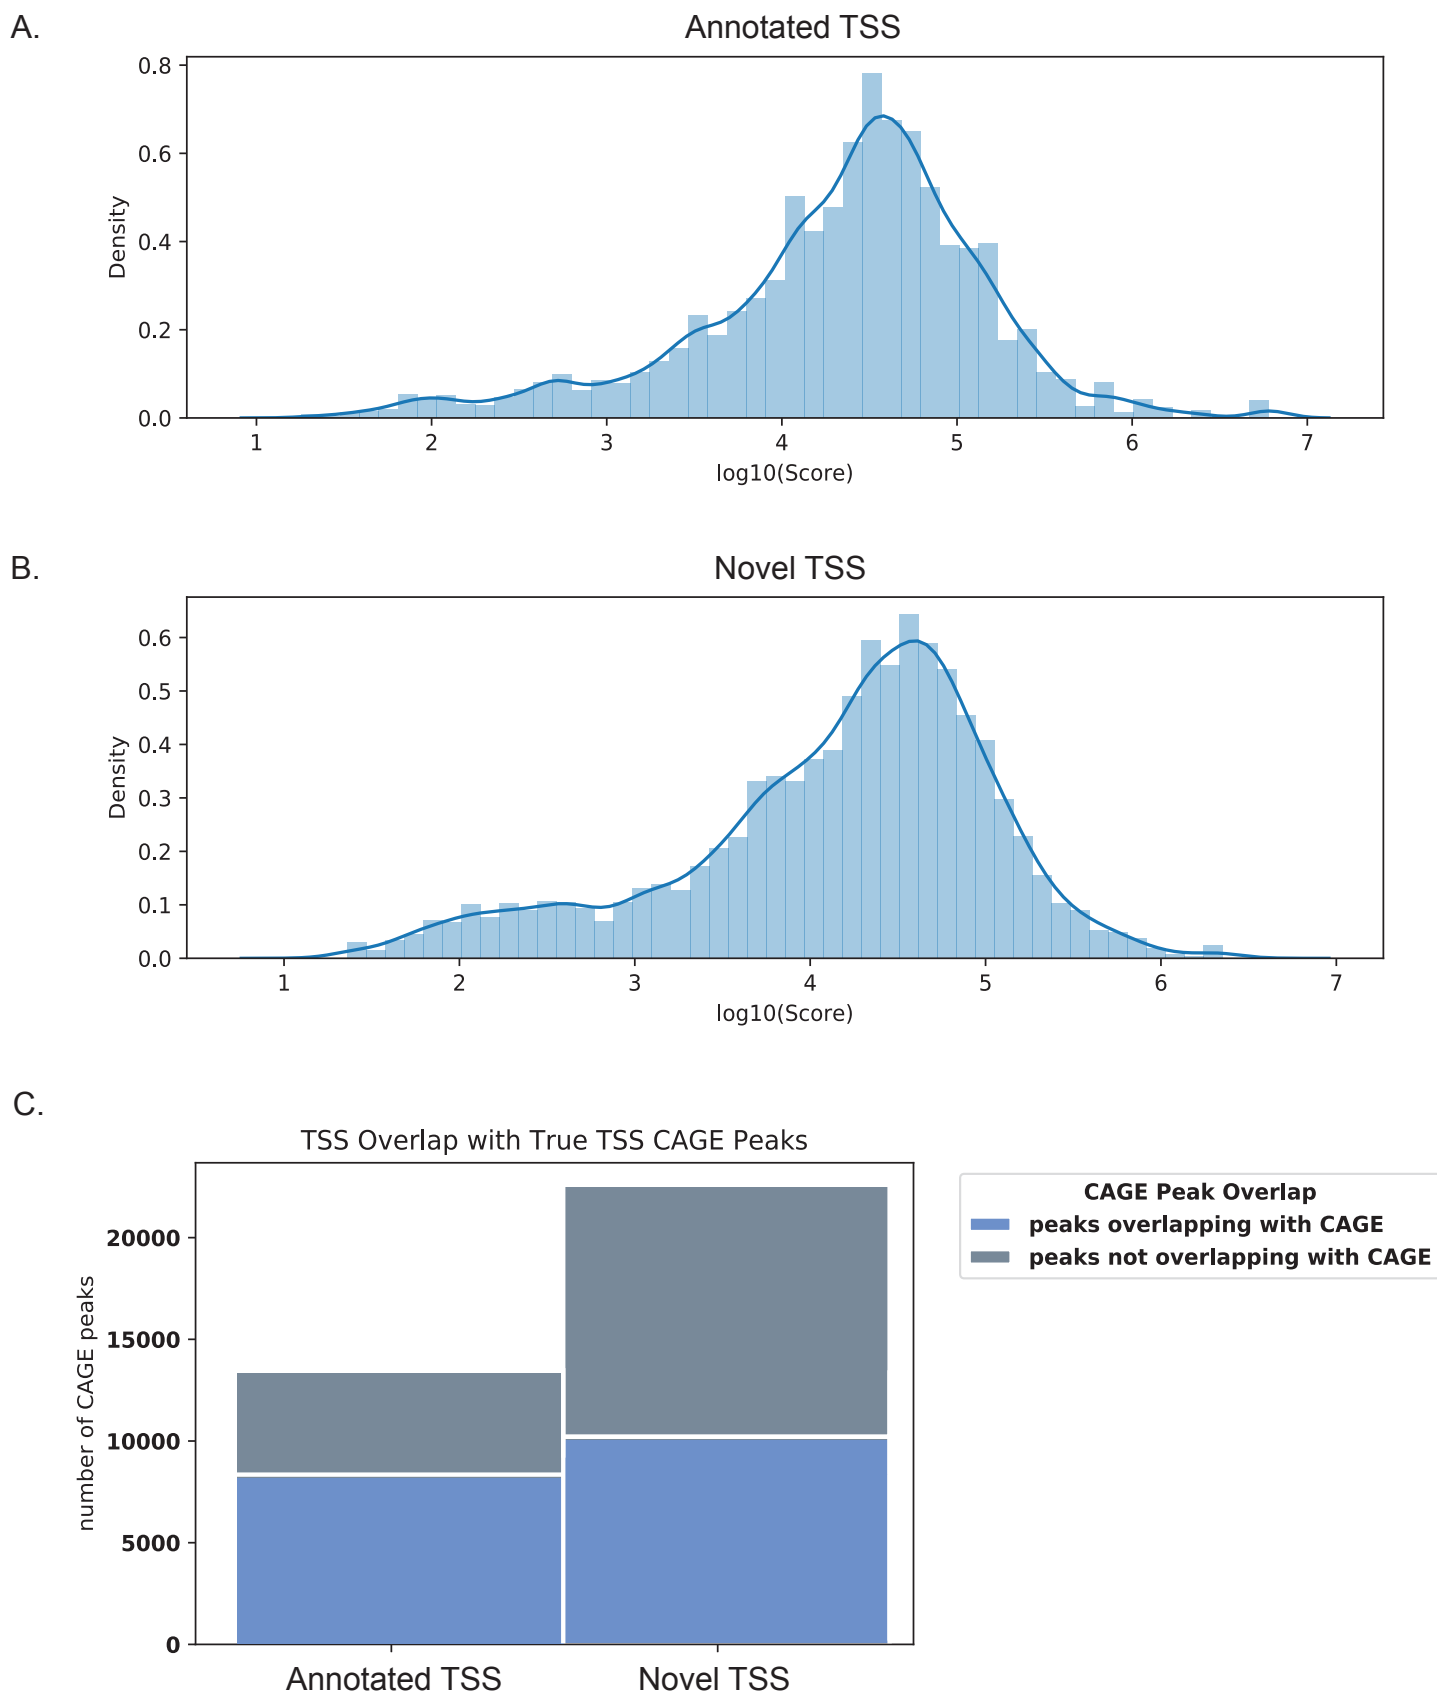

**Figure 1 - Supplemental Figure 8: CAGE Scores Support Validity of Novel TSS identified by Nanopore Sequencing.** CAGE scores of CAGE peaks overlapping the 5'UTR region of (A) annotated and (B) novel transcript isoforms. (C) Bar graph of TSS peaks overlapping and not overlapping with CAGE data.
