# Supplementary material for: Inflammation drives alternative first exon usage to regulate immune genes including a novel iron-regulated isoform of Aim2
Source: eLife journal article supplement (doi:10.7554/elife.69431), 2021-05-28
Supplement: supp [file Table4_DESeq2_Hu_TLR4_Macs.xlsx]

## Sheet: Sheet1
symbol	id	baseMean	baseMean_macrounstim	baseMean_macrotlr4	foldChange	log2FoldChange	pval	padj
EBI3	kgCluster13972	673.293	23.0495	1323.54	57.4214	5.84352	3.09564e-43	6.70206e-39
SLCO5A1	kgCluster28068	231.34	0.865623	461.815	533.505	9.05936	8.75287e-39	9.47499e-35
LAMP3	kgCluster20645	1478.9	83.3243	2874.47	34.4974	5.10842	6.73338e-38	4.85926e-34
C18orf1	kgCluster13496	481.209	921.027	41.3916	0.0449406	-4.47584	7.02748e-35	3.80362e-31
CDC42EP2	kgCluster5029	540.684	24.6565	1056.71	42.8573	5.42147	1.83061e-34	7.92653e-31
ABTB2	kgCluster4460	1183.26	27.1491	2339.38	86.168	6.42908	4.14937e-34	1.49723e-30
MT1E	kgCluster11223	265.129	16.1988	514.058	31.7344	4.98798	1.76603e-33	5.46207e-30
CD274	kgCluster28607	2369.31	291.136	4447.49	15.2764	3.93323	8.50404e-32	2.30141e-28
HIST2H2AA3	kgCluster1594	255.942	25.5874	486.296	19.0053	4.24833	1.81711e-30	4.37117e-27
MT1M	kgCluster11224	258.292	8.3378	508.247	60.9569	5.92972	3.37021e-30	7.29651e-27
HIST2H2AA3	kgCluster1596	252.449	26.6421	478.256	17.9511	4.166	9.60891e-30	1.89121e-26
HIST2H2BE	kgCluster1599	376.305	25.7024	726.907	28.2817	4.82179	1.69883e-29	3.06497e-26
IFI44L	kgCluster1068	2989.03	371.653	5606.4	15.085	3.91504	5.33012e-29	8.8767e-26
TRAF1	kgCluster29447	2144.48	325.458	3963.5	12.1782	3.60623	1.53164e-28	2.36857e-25
CLEC4E	kgCluster5957	600.055	68.329	1131.78	16.5637	4.04995	3.36311e-28	4.85408e-25
SOCS3	kgCluster13212	1603.23	231.512	2974.95	12.8501	3.68371	5.64995e-28	7.64509e-25
TNFAIP6	kgCluster16836	1252.66	87.6772	2417.65	27.5744	4.78526	3.66538e-27	4.40864e-24
ZC3H12A	kgCluster666	1258.04	195.189	2320.88	11.8904	3.57173	3.60035e-27	4.40864e-24
MT1H	kgCluster11231	241.935	29.6704	454.2	15.3082	3.93623	3.83265e-26	4.3672e-23
IL7R	kgCluster22087	1326.16	211.248	2441.07	11.5555	3.53051	5.70388e-26	6.17445e-23
ISG20	kgCluster10036	712.689	75.7599	1349.62	17.8144	4.15497	1.6872e-25	1.73942e-22
GCH1	kgCluster8085	1578.02	159.462	2996.59	18.7919	4.23203	2.5231e-25	2.41586e-22
IDO1	kgCluster27908	1652.68	184.762	3120.6	16.8898	4.07808	2.56651e-25	2.41586e-22
C17orf96	kgCluster12445	477.959	76.9544	878.963	11.4219	3.51373	3.04571e-25	2.74748e-22
CD80	kgCluster20174	1421.57	178.614	2664.53	14.9178	3.89896	9.5446e-25	8.26563e-22
IRF4	kgCluster23171	1141.11	185.064	2097.15	11.3321	3.50234	1.35073e-24	1.12474e-21
DUSP5	kgCluster3810	960.438	169.654	1751.22	10.3223	3.3677	2.37547e-24	1.90477e-21
HIST1H2AC	kgCluster23366	426.86	57.9367	795.783	13.7354	3.77983	2.79822e-24	2.16362e-21
PRRT2	kgCluster11008	60.9513	1.66142	120.241	72.3726	6.17737	4.27583e-24	3.19212e-21
CCR7	kgCluster12513	1526.66	227.73	2825.6	12.4076	3.63316	5.13224e-24	3.70376e-21
TNIP3	kgCluster21572	814.043	69.6015	1558.48	22.3915	4.48488	5.51962e-24	3.85483e-21
MT1JP	kgCluster11225	66.407	1.32708	131.487	99.0797	6.63052	9.3404e-24	5.94764e-21
CSRNP1	kgCluster19605	1041.3	171.76	1910.83	11.125	3.47573	9.12277e-24	5.94764e-21
HERC6	kgCluster21409	1263.63	233.094	2294.17	9.84222	3.29898	8.96212e-24	5.94764e-21
ADORA2A	kgCluster18868	904.277	41.7454	1766.81	42.3234	5.40338	1.25957e-23	7.79131e-21
MCOLN2	kgCluster1094	1253.52	101.958	2405.08	23.5889	4.56003	1.99785e-23	1.20149e-20
MT1G	kgCluster11230	299.504	45.495	553.514	12.1665	3.60484	2.30591e-23	1.34927e-20
NR4A3	kgCluster29294	1428.57	167.431	2689.71	16.0646	4.00581	4.97413e-23	2.83395e-20
PTGIR	kgCluster15083	667.508	86.5378	1248.48	14.4269	3.85069	5.60184e-23	3.10974e-20
IRF7	kgCluster4042	1295.61	258.791	2332.44	9.01283	3.17198	8.61527e-23	4.66302e-20
HIST1H2BD	kgCluster23368	114.993	5.59271	224.394	40.1226	5.32634	1.1034e-22	5.82649e-20
F13A1	kgCluster23226	1638.3	3064.63	211.976	0.0691685	-3.85374	1.22241e-22	6.30122e-20
SLC2A6	kgCluster29691	1777.01	355.391	3198.63	9.00033	3.16998	2.01498e-22	1.01452e-19
GBP4	kgCluster1129	3146.39	392.169	5900.62	15.0461	3.91132	5.76511e-22	2.8367e-19
MBNL3	kgCluster30778	524.781	959.735	89.8279	0.0935965	-3.4174	7.86292e-22	3.78294e-19
SLAMF1	kgCluster1946	838.352	39.9185	1636.79	41.0032	5.35766	1.19908e-21	5.52345e-19
CD300E	kgCluster13096	2082.34	340.086	3824.6	11.246	3.49134	1.17661e-21	5.52345e-19
PRIC285	kgCluster18255	4586.64	494.69	8678.58	17.5435	4.13286	1.31657e-21	5.9383e-19
C1RL	kgCluster5923	568.569	97.4554	1039.68	10.6683	3.41526	1.43065e-21	6.32116e-19
BIRC3	kgCluster5431	1911.13	433.131	3389.13	7.82471	2.96804	1.96238e-21	8.49712e-19
CMPK2	kgCluster15694	1599.03	250.111	2947.96	11.7866	3.55908	2.00607e-21	8.51597e-19
SGK223	kgCluster27640	228.411	412.534	44.2887	0.107358	-3.2195	2.47636e-21	1.03102e-18
CAMKK1	kgCluster11726	170.022	322.189	17.8546	0.0554165	-4.17354	3.43311e-21	1.40239e-18
MYO10	kgCluster22025	1921.37	323.006	3519.74	10.8968	3.44584	4.2365e-21	1.69852e-18
DHX58	kgCluster12590	1506.89	334.339	2679.45	8.01417	3.00255	5.86863e-21	2.31011e-18
ADAM19	kgCluster22912	2533.82	116.767	4950.87	42.3995	5.40597	6.05413e-21	2.33011e-18
CCL5	kgCluster12349	1194.64	247.238	2142.05	8.66392	3.11502	6.1347e-21	2.33011e-18
MAF	kgCluster11494	1412.96	2534.95	290.964	0.114781	-3.12304	6.5911e-21	2.4603e-18
PTPN22	kgCluster1352	436.849	784.486	89.2118	0.11372	-3.13644	8.08446e-21	2.91714e-18
CHST2	kgCluster20423	688.346	152.826	1223.87	8.00821	3.00148	7.96703e-21	2.91714e-18
CCL23	kgCluster12357	123.471	19.2458	227.695	11.8309	3.56449	8.48729e-21	2.96371e-18
PANX2	kgCluster19322	100.399	18.061	182.736	10.1177	3.33881	8.46947e-21	2.96371e-18
FAM198A	kgCluster19647	28.1586	55.2094	1.10788	0.0200669	-5.63904	1.13424e-20	3.89783e-18
C10orf128	kgCluster3197	113.802	216.737	10.8675	0.0501412	-4.31786	1.6255e-20	5.41418e-18
SLC37A2	kgCluster5701	1869.38	3453.61	285.154	0.0825671	-3.59829	1.60802e-20	5.41418e-18
TLE3	kgCluster9707	829.849	1464.94	194.754	0.132943	-2.91112	2.27279e-20	7.45544e-18
HERC5	kgCluster21410	2227.75	438.314	4017.2	9.16511	3.19615	3.31484e-20	1.07114e-17
IFITM1	kgCluster4022	583.726	120.081	1047.37	8.72219	3.12469	3.71934e-20	1.18417e-17
BATF3	kgCluster2501	64.95	9.63109	120.269	12.4876	3.64242	3.90041e-20	1.22383e-17
MT1X	kgCluster11233	281.318	53.1304	509.505	9.58971	3.26149	4.02468e-20	1.24478e-17
GBP1	kgCluster1126	2668.51	602.653	4734.37	7.85587	2.97377	5.0566e-20	1.54191e-17
SAMD9	kgCluster26828	3601.12	780.6	6421.64	8.22654	3.04029	6.89648e-20	2.07373e-17
C20orf27	kgCluster17619	272.997	503.133	42.8601	0.0851865	-3.55323	7.82887e-20	2.29047e-17
PKP4	kgCluster16869	192.238	348.105	36.371	0.104483	-3.25866	7.78121e-20	2.29047e-17
PPM1K	kgCluster21407	926.719	168.466	1684.97	10.0018	3.3222	8.58108e-20	2.47707e-17
ADORA2A	kgCluster18869	212.866	8.49024	417.242	49.1437	5.61893	8.84391e-20	2.51935e-17
SH3PXD2A	kgCluster3781	1210.37	2262.6	158.13	0.0698883	-3.83881	1.05063e-19	2.95404e-17
IFI27	kgCluster8463	486.434	38.2196	934.648	24.4547	4.61204	1.58873e-19	4.40975e-17
IFIH1	kgCluster16893	2576.69	635.345	4518.03	7.11114	2.83008	1.91073e-19	5.23635e-17
TBC1D4	kgCluster7506	297.727	552.082	43.3719	0.0785606	-3.67005	2.63802e-19	7.13914e-17
MX2	kgCluster18524	2687.83	664.189	4711.48	7.09358	2.82651	3.22463e-19	8.61893e-17
USP18	kgCluster18693	1193.4	162.75	2224.05	13.6655	3.77246	4.43399e-19	1.17068e-16
DDX58	kgCluster28736	2353.17	350.167	4356.17	12.4403	3.63694	5.47646e-19	1.4285e-16
PML	kgCluster9758	2990.41	754.564	5226.26	6.9262	2.79206	6.21126e-19	1.60088e-16
ANKRD33B	kgCluster22009	294.492	51.5524	537.431	10.4249	3.38197	7.06179e-19	1.79868e-16
CABLES1	kgCluster13534	285.587	565.594	5.57989	0.00986553	-6.66339	1.09148e-18	2.74773e-16
RNF144B	kgCluster23306	1994.77	508.858	3480.67	6.84017	2.77403	1.14482e-18	2.84889e-16
TM6SF1	kgCluster9970	395.883	702.998	88.7685	0.126271	-2.9854	1.64595e-18	4.04942e-16
TNFAIP3	kgCluster24647	3289.97	844.73	5735.2	6.78939	2.76328	1.81752e-18	4.42126e-16
DNM3	kgCluster2128	77.8086	148.473	7.14413	0.0481173	-4.3773	1.98198e-18	4.76776e-16
ALOX5	kgCluster3139	398.373	721.025	75.7206	0.105018	-3.25129	2.34003e-18	5.56722e-16
ITGA11	kgCluster9691	55.3486	104.475	6.2226	0.0595609	-4.06949	2.42955e-18	5.71735e-16
MT1F	kgCluster11229	286.148	60.015	512.28	8.53587	3.09354	2.8814e-18	6.70777e-16
HSH2D	kgCluster14391	314.788	62.7017	566.875	9.04083	3.17646	3.29542e-18	7.58998e-16
GRAMD4	kgCluster19299	1154.39	2099.52	209.268	0.0996745	-3.32663	4.40465e-18	1.0038e-15
ITGA4	kgCluster17034	1370.85	2500.83	240.864	0.096314	-3.37611	4.87949e-18	1.10043e-15
OASL	kgCluster7023	1181.74	119.053	2244.44	18.8524	4.23667	5.27891e-18	1.17823e-15
WNT5A	kgCluster19891	764.174	150.398	1377.95	9.16203	3.19567	6.15561e-18	1.35989e-15
SLC2A9	kgCluster20979	294.529	531.178	57.88	0.108965	-3.19806	7.275e-18	1.59095e-15
ZSWIM4	kgCluster14283	613.08	159.894	1066.27	6.66859	2.73738	8.57987e-18	1.85754e-15
CD200R1	kgCluster20132	157.517	284.128	30.9071	0.108779	-3.20053	9.36663e-18	2.0078e-15
ITGB8	kgCluster26229	3445.27	223.777	6666.77	29.792	4.89685	1.11853e-17	2.37414e-15
CTNNBIP1	kgCluster190	186.922	333.427	40.4171	0.121217	-3.04433	1.38173e-17	2.90432e-15
LGR4	kgCluster4418	152.212	277.435	26.9892	0.0972813	-3.36169	1.59358e-17	3.3174e-15
HIST1H4H	kgCluster23386	64.7403	10.1963	119.284	11.6988	3.54829	1.90748e-17	3.93305e-15
SORL1	kgCluster5639	1172.33	2183.52	161.146	0.0738009	-3.76022	2.12054e-17	4.32702e-15
IMPA2	kgCluster13483	140.302	258.832	21.7717	0.0841149	-3.57149	2.1785e-17	4.32702e-15
XAF1	kgCluster11811	2158.34	578.385	3738.28	6.46332	2.69228	2.17418e-17	4.32702e-15
DUSP1	kgCluster23004	922.339	248.306	1596.37	6.42905	2.68461	2.17611e-17	4.32702e-15
SKI	kgCluster97	505.429	877.658	133.2	0.151767	-2.72007	2.37686e-17	4.67808e-15
GPD1L	kgCluster19553	216.407	411.972	20.8432	0.0505937	-4.3049	2.77307e-17	5.40874e-15
IL15RA	kgCluster2885	1077.85	117.819	2037.87	17.2966	4.11241	2.88521e-17	5.57721e-15
HIST2H2AC	kgCluster1600	60.9516	8.14368	113.76	13.9691	3.80416	3.0712e-17	5.88421e-15
SAMD9L	kgCluster26829	4264.31	1174.84	7353.77	6.25937	2.64602	3.12696e-17	5.93848e-15
LOC283070	kgCluster2925	126.798	226.693	26.9026	0.118674	-3.07492	3.18249e-17	5.99138e-15
BC040865	kgCluster27513	199.771	16.5382	383.003	23.1587	4.53348	4.09889e-17	7.65008e-15
GBP1P1	kgCluster1132	336.561	21.2582	651.864	30.6641	4.93848	4.19009e-17	7.75346e-15
CD180	kgCluster22251	672.507	1235.93	109.087	0.0882637	-3.50204	4.46718e-17	8.19615e-15
AGRN	kgCluster37	2926.3	824.101	5028.49	6.1018	2.60923	6.7444e-17	1.22703e-14
JAK3	kgCluster14437	1508.85	222.867	2794.84	12.5404	3.64851	7.56053e-17	1.36405e-14
FAS	kgCluster3564	485.239	112.898	857.58	7.59606	2.92525	1.26133e-16	2.25683e-14
SOCS1	kgCluster10727	97.6632	23.1349	172.191	7.44292	2.89587	1.40998e-16	2.50214e-14
HS3ST3B1	kgCluster11972	522.954	22.0569	1023.85	46.4186	5.53663	1.64829e-16	2.90126e-14
APOL3	kgCluster19024	1581.96	294.165	2869.76	9.75562	3.28623	2.1951e-16	3.83257e-14
MT2A	kgCluster11221	378.149	96.388	659.91	6.84639	2.77534	2.41731e-16	4.18678e-14
PRKCB	kgCluster10908	708.562	1213.17	203.952	0.168115	-2.57248	2.7584e-16	4.73963e-14
TMC8	kgCluster13202	582.931	1132.96	32.9026	0.0290413	-5.10575	2.9741e-16	5.07003e-14
KIAA0040	kgCluster2167	1256.75	319.122	2194.37	6.87629	2.78163	3.10115e-16	5.24531e-14
TMEM229B	kgCluster8196	226.993	39.5045	414.482	10.492	3.39122	3.47579e-16	5.78755e-14
PRADC1	kgCluster16203	150.918	265.894	35.9422	0.135175	-2.8871	3.48427e-16	5.78755e-14
MT1A	kgCluster11226	204.66	48.7976	360.523	7.38813	2.88521	3.50194e-16	5.78755e-14
APOL1	kgCluster19028	1555.45	449.84	2661.05	5.91555	2.56451	3.68957e-16	6.05146e-14
ANKH	kgCluster22017	1085.01	1864.48	305.546	0.163878	-2.60931	4.16432e-16	6.77876e-14
ATXN7L1	kgCluster27042	862.517	241.749	1483.29	6.13565	2.61722	4.41676e-16	7.13604e-14
FW340097	kgCluster16835	54.3753	1.38613	107.364	77.4561	6.27531	5.58517e-16	8.95695e-14
TLE1	kgCluster29084	167.766	24.4044	311.128	12.7488	3.6723	7.77177e-16	1.2372e-13
RNF19B	kgCluster610	1898.21	570.672	3225.74	5.65253	2.4989	8.96859e-16	1.4173e-13
NT5C3	kgCluster26358	1083.56	220.73	1946.4	8.81801	3.14045	9.96063e-16	1.56266e-13
IFIT3	kgCluster3574	2313.97	550.416	4077.53	7.4081	2.8891	1.11627e-15	1.72623e-13
OAS2	kgCluster6941	3701.83	1080.14	6323.52	5.85437	2.54951	1.10936e-15	1.72623e-13
RSAD2	kgCluster15695	3067.43	470.934	5663.93	12.027	3.58821	1.28385e-15	1.9713e-13
AX747191	kgCluster13915	31.9411	59.9874	3.89479	0.0649268	-3.94504	1.87631e-15	2.86071e-13
CYP27B1	kgCluster6551	1353.71	43.1895	2664.22	61.6868	5.94689	2.14554e-15	3.24832e-13
NRGN	kgCluster5691	49.9764	96.7815	3.17133	0.0327679	-4.93157	2.5208e-15	3.78995e-13
HADH	kgCluster21498	323.678	592.639	54.716	0.0923261	-3.43712	2.67281e-15	3.99078e-13
OAS3	kgCluster6940	5832.91	1704.63	9961.2	5.84362	2.54686	2.92559e-15	4.33829e-13
TNFSF10	kgCluster20595	1378.94	223.226	2534.65	11.3547	3.50521	3.01347e-15	4.43821e-13
GRAMD1A	kgCluster14681	2404.58	601.619	4207.55	6.9937	2.80606	3.29771e-15	4.82401e-13
EMR1	kgCluster14054	1432.07	162.656	2701.47	16.6085	4.05385	3.57251e-15	5.17942e-13
PRKCA	kgCluster13025	760.355	1285.97	234.738	0.182537	-2.45374	3.58852e-15	5.17942e-13
HS3ST3A1	kgCluster11965	110.82	3.27981	218.36	66.577	6.05695	4.22463e-15	6.05716e-13
LINGO3	kgCluster13914	29.1883	54.9526	3.42403	0.0623088	-4.00442	4.31608e-15	6.14758e-13
MRC1	kgCluster2975	2101.2	3757.39	445.014	0.118437	-3.07781	4.93706e-15	6.98611e-13
GSDMA	kgCluster12494	277.036	505.165	48.9062	0.0968123	-3.36867	5.09244e-15	7.15918e-13
PTGS1	kgCluster29465	878.573	1487.25	269.893	0.181471	-2.46219	5.20013e-15	7.26341e-13
MRC1	kgCluster2972	2159.95	3885.42	434.485	0.111824	-3.16069	6.66584e-15	9.25098e-13
GABBR1	kgCluster23640	377.008	110.087	643.93	5.84929	2.54826	6.93971e-15	9.56972e-13
RTP4	kgCluster20714	275.032	60.8778	489.187	8.03556	3.0064	7.23978e-15	9.92033e-13
PRR5L	kgCluster4478	307.91	589.908	25.9126	0.0439266	-4.50876	7.63902e-15	1.04016e-12
GPR34	kgCluster30162	620.437	1229.38	11.4937	0.00934919	-6.74094	1.00714e-14	1.36279e-12
AIM2	kgCluster1907	504.56	12.7336	996.386	78.2487	6.29	1.13606e-14	1.52768e-12
IFIT5	kgCluster3577	897.334	279.73	1514.94	5.41572	2.43715	1.37351e-14	1.83559e-12
RPS6KA2	kgCluster24833	1061.07	1804.11	318.021	0.176275	-2.5041	1.75914e-14	2.3253e-12
KCNAB2	kgCluster140	1790.58	2994.88	586.282	0.195761	-2.35283	1.76143e-14	2.3253e-12
AMICA1	kgCluster5580	333.684	648.335	19.0333	0.0293572	-5.09014	1.77266e-14	2.32595e-12
EPSTI1	kgCluster7360	1122.21	352.587	1891.84	5.3656	2.42374	1.88104e-14	2.45329e-12
FBXO6	kgCluster213	688.401	217.34	1159.46	5.3348	2.41543	1.91553e-14	2.48331e-12
XRN1	kgCluster20413	2984.47	982.463	4986.47	5.07548	2.34354	2.0102e-14	2.59053e-12
FAM101B	kgCluster11648	409.434	729.862	89.0066	0.12195	-3.03564	2.08822e-14	2.67514e-12
AK056686	kgCluster9284	83.7605	5.42094	162.1	29.9026	4.9022	2.16205e-14	2.73763e-12
MX1	kgCluster18525	2766.89	806.912	4726.87	5.85798	2.5504	2.16229e-14	2.73763e-12
CXCL3	kgCluster21297	448.964	96.0079	801.921	8.35266	3.06224	2.23437e-14	2.81245e-12
TNFRSF11A	kgCluster13739	448.428	803.641	93.216	0.115992	-3.1079	2.28728e-14	2.8624e-12
MUC1	kgCluster1793	224.014	8.89005	439.139	49.3966	5.62634	2.30392e-14	2.86665e-12
MYO1G	kgCluster26457	2872.9	898.523	4847.28	5.39472	2.43155	2.53532e-14	3.13655e-12
P2RY8	kgCluster29921	265.914	510.935	20.8921	0.04089	-4.61211	2.96033e-14	3.64154e-12
RBM43	kgCluster16833	790.919	254.402	1327.44	5.21786	2.38346	3.32533e-14	4.06743e-12
UBXN11	kgCluster484	391.494	705.178	77.8101	0.110341	-3.17996	3.54391e-14	4.31043e-12
RNF24	kgCluster17631	470.128	147.827	792.429	5.36051	2.42237	3.88123e-14	4.69434e-12
CYP27B1	kgCluster6552	479.421	15.1466	943.695	62.304	5.96125	4.01969e-14	4.83479e-12
NFIL3	kgCluster29176	665.255	212.695	1117.81	5.25547	2.39382	4.29545e-14	5.13793e-12
CCL19	kgCluster28798	584.301	15.1153	1153.49	76.3125	6.25385	4.36467e-14	5.19204e-12
MSC	kgCluster28079	931.001	152.248	1709.75	11.2301	3.4893	4.76059e-14	5.63109e-12
DOK2	kgCluster27744	504.951	856.566	153.336	0.179012	-2.48187	4.78578e-14	5.63109e-12
CEBPA	kgCluster14625	507.276	879.624	134.929	0.153393	-2.70469	5.89738e-14	6.90152e-12
CKB	kgCluster8673	505.514	28.5844	982.444	34.3699	5.10307	5.97553e-14	6.92946e-12
RNF166	kgCluster11586	371.99	632.355	111.626	0.176525	-2.50206	5.98526e-14	6.92946e-12
QPRT	kgCluster11001	346.011	623.889	68.1327	0.109206	-3.19487	6.59896e-14	7.59934e-12
HIST1H2BC	kgCluster23365	94.7022	9.33808	180.066	19.283	4.26926	6.64377e-14	7.61046e-12
FARP1	kgCluster7575	428.004	728.92	127.088	0.174351	-2.51993	7.43012e-14	8.46643e-12
APPL2	kgCluster6848	602.482	1011.2	193.764	0.191617	-2.3837	1.2341e-13	1.39886e-11
CLEC10A	kgCluster11825	187.002	360.009	13.9948	0.0388735	-4.68507	1.24239e-13	1.40093e-11
SACS	kgCluster7205	433.615	725.866	141.365	0.194753	-2.36028	1.30923e-13	1.46864e-11
MN1	kgCluster18909	730.855	13.4301	1448.28	107.838	6.75272	1.35946e-13	1.51713e-11
SEMA3C	kgCluster26775	1615.06	581.871	2648.26	4.55129	2.18627	1.42496e-13	1.58207e-11
TOR1B	kgCluster29624	1594.93	497.288	2692.57	5.41451	2.43683	1.78851e-13	1.97557e-11
PFKFB2	kgCluster2453	566.328	946.075	186.58	0.197215	-2.34216	1.80385e-13	1.9824e-11
CASZ1	kgCluster200	248.188	79.5618	416.815	5.23888	2.38926	1.81751e-13	1.98733e-11
SP110	kgCluster17376	1158.07	399.672	1916.47	4.79512	2.26157	2.10649e-13	2.29173e-11
IL16	kgCluster9906	568.483	957.402	179.564	0.187554	-2.41462	2.51745e-13	2.72514e-11
AZI1	kgCluster13261	117.823	203.021	32.6246	0.160696	-2.6376	2.54763e-13	2.74409e-11
P2RY8	kgCluster31075	266.892	510.84	22.9437	0.0449137	-4.4767	2.56296e-13	2.74694e-11
ADK	kgCluster3392	298.575	506.06	91.0899	0.179998	-2.47394	2.64433e-13	2.82018e-11
CLEC4D	kgCluster5956	227.907	10.9571	444.857	40.5997	5.3434	2.66625e-13	2.82962e-11
PTGER2	kgCluster8069	616.564	178.611	1054.52	5.90398	2.56169	2.74276e-13	2.89662e-11
SERPING1	kgCluster4772	1155.88	150.771	2161	14.333	3.84127	2.85258e-13	2.99798e-11
SNHG15	kgCluster26458	375.232	119.154	631.311	5.29827	2.40552	3.20617e-13	3.33719e-11
OAS1	kgCluster6939	1509.71	519.594	2499.83	4.81113	2.26638	3.19493e-13	3.33719e-11
HHEX	kgCluster3609	168.981	314.092	23.87	0.0759968	-3.71792	3.25139e-13	3.36807e-11
HIST1H2BJ	kgCluster23456	43.3809	7.3918	79.3699	10.7376	3.4246	3.31123e-13	3.41372e-11
GK	kgCluster30110	1286.49	410.293	2162.68	5.27107	2.39809	3.74106e-13	3.83858e-11
PDE4B	kgCluster996	1840.5	227.355	3453.64	15.1905	3.9251	3.81282e-13	3.89375e-11
ARNTL2	kgCluster6148	968.593	313.113	1624.07	5.18686	2.37486	3.88511e-13	3.94895e-11
TBXAS1	kgCluster27284	744.081	1226.16	262.004	0.213678	-2.22649	4.06665e-13	4.11416e-11
CMTM4	kgCluster11295	248.888	412.283	85.4931	0.207365	-2.26975	4.13242e-13	4.16125e-11
IFIT2	kgCluster3573	2569.35	426.193	4712.51	11.0572	3.46692	4.30042e-13	4.31037e-11
C22orf29	kgCluster18725	436.765	729.894	143.637	0.196791	-2.34526	4.33986e-13	4.32986e-11
DDX60	kgCluster21792	1657.79	569.799	2745.79	4.81887	2.2687	4.40594e-13	4.37562e-11
ISG15	kgCluster36	637.926	203.496	1072.36	5.26966	2.39771	4.55221e-13	4.50024e-11
PRAM1	kgCluster14109	268.839	481.49	56.1875	0.116695	-3.09918	4.77772e-13	4.70171e-11
HPCAL1	kgCluster15718	647.816	1076.41	219.219	0.203657	-2.29578	4.96693e-13	4.86579e-11
IER5L	kgCluster29611	255.539	444.208	66.8696	0.150537	-2.73181	5.0431e-13	4.91815e-11
CCL4	kgCluster12360	562.807	182.347	943.266	5.17291	2.37098	5.07013e-13	4.92234e-11
RUFY3	kgCluster21276	1438.51	496.744	2380.29	4.79178	2.26056	5.40823e-13	5.22715e-11
SLC25A28	kgCluster3693	924.116	314.684	1533.55	4.87329	2.2849	6.18995e-13	5.95611e-11
CHI3L2	kgCluster1310	504.045	9.17402	998.915	108.885	6.76666	6.38092e-13	6.11269e-11
AX747756	kgCluster28735	159.598	9.563	309.633	32.3782	5.01695	6.49118e-13	6.19093e-11
SLC17A9	kgCluster18230	291.499	520.186	62.8115	0.120748	-3.04993	6.72347e-13	6.38435e-11
STK39	kgCluster16917	147.761	249.403	46.1189	0.184917	-2.43505	6.96998e-13	6.58952e-11
ZHX3	kgCluster17981	352.201	587.27	117.132	0.199452	-2.32589	7.4116e-13	6.97657e-11
ACOX2	kgCluster19918	60.7144	117.271	4.15779	0.0354546	-4.81788	7.44918e-13	6.98159e-11
PIWIL4	kgCluster5397	293.3	80.6845	505.916	6.2703	2.64853	8.5335e-13	7.96338e-11
PNRC1	kgCluster24367	1888.83	672.923	3104.73	4.6138	2.20596	8.71177e-13	8.09484e-11
UBD	kgCluster23639	184.851	2.96783	366.735	123.57	6.94919	8.83295e-13	8.17237e-11
TRIM5	kgCluster4191	852.917	301.313	1404.52	4.66134	2.22074	9.1655e-13	8.44396e-11
HSD11B1	kgCluster2473	319.706	37.3201	602.091	16.1332	4.01196	9.21087e-13	8.4498e-11
IFIT1	kgCluster3576	1664.13	347.465	2980.79	8.57867	3.10075	9.70725e-13	8.86759e-11
AK055458	kgCluster27506	240.691	77.4789	403.904	5.21309	2.38214	9.85346e-13	8.96334e-11
ABCC5	kgCluster20657	1239.75	2070.93	408.577	0.197292	-2.3416	1.12635e-12	1.02031e-10
CYP27B1	kgCluster6553	132.321	4.71612	259.926	55.1144	5.78436	1.17539e-12	1.0603e-10
REPS2	kgCluster30037	202.017	364.502	39.5319	0.108455	-3.20483	1.24768e-12	1.12084e-10
SLC39A10	kgCluster17092	256.047	477.297	34.7971	0.0729045	-3.77785	1.2806e-12	1.14566e-10
SLC41A2	kgCluster6843	1061.23	374.186	1748.28	4.67221	2.22411	1.31944e-12	1.17555e-10
C5orf56	kgCluster22613	102.054	26.1183	177.99	6.81476	2.76866	1.33732e-12	1.1866e-10
IFI44	kgCluster1069	1445.02	507.156	2382.89	4.69854	2.23221	1.51685e-12	1.3404e-10
RELB	kgCluster15019	1174.83	416.473	1933.18	4.6418	2.21468	1.60736e-12	1.4146e-10
DL490908	kgCluster7101	103.529	176.62	30.4383	0.172338	-2.53669	1.81593e-12	1.5917e-10
MCM6	kgCluster16793	600.089	1080.32	119.858	0.110946	-3.17206	1.99535e-12	1.7419e-10
RGS18	kgCluster2283	167.229	316.417	18.0409	0.0570162	-4.13249	2.02451e-12	1.76026e-10
NAMPT	kgCluster27045	3641.42	1291.09	5991.76	4.64087	2.21439	2.03679e-12	1.76386e-10
CNKSR3	kgCluster24755	125.097	217.006	33.1878	0.152935	-2.70901	2.29486e-12	1.97943e-10
FAM109A	kgCluster6921	223.752	385.613	61.8905	0.160499	-2.63936	2.34098e-12	2.0112e-10
TDRD7	kgCluster29268	1326.83	487.28	2166.39	4.44588	2.15247	2.50227e-12	2.14127e-10
STX11	kgCluster24691	1335.5	501.893	2169.11	4.32186	2.11165	2.87235e-12	2.44829e-10
SLC38A6	kgCluster8141	604.668	995.201	214.135	0.215167	-2.21647	3.08798e-12	2.62175e-10
unknown	kgCluster21406	306.105	107.967	504.242	4.67033	2.22352	3.38271e-12	2.86077e-10
IL15	kgCluster21651	224.161	44.7659	403.557	9.01484	3.1723	3.41365e-12	2.86884e-10
HIVEP1	kgCluster23271	1942.46	756.102	3128.82	4.13809	2.04897	3.41876e-12	2.86884e-10
B3GALNT1	kgCluster20544	152.138	259.171	45.1061	0.17404	-2.52251	3.55861e-12	2.97467e-10
DAPP1	kgCluster21460	1187.22	429.613	1944.82	4.52691	2.17853	3.59319e-12	2.99202e-10
WTAP	kgCluster24791	2638.07	952.937	4323.2	4.53671	2.18165	3.62727e-12	3.00882e-10
MTF1	kgCluster679	2826.32	1020.79	4631.85	4.53752	2.1819	3.70758e-12	3.0637e-10
PTGER4	kgCluster22117	1623.28	618.787	2627.78	4.24667	2.08633	4.39919e-12	3.62139e-10
HIST2H4A	kgCluster1592	51.7368	12.7974	90.6762	7.08549	2.82487	4.44248e-12	3.64317e-10
ZFHX2	kgCluster7879	184.223	58.1255	310.32	5.33879	2.41651	4.5136e-12	3.68752e-10
IRF1	kgCluster22615	1553.8	570.138	2537.47	4.45062	2.15401	4.63712e-12	3.7742e-10
PNPT1	kgCluster16060	1185.91	432.469	1939.36	4.48439	2.16491	4.82284e-12	3.91066e-10
NLRC5	kgCluster11239	1989.28	749.226	3229.33	4.31022	2.10776	4.88964e-12	3.95003e-10
HLX	kgCluster2545	639.4	242.478	1036.32	4.27388	2.09555	5.48758e-12	4.41658e-10
NUB1	kgCluster27505	2074.84	768.773	3380.91	4.3978	2.13678	5.62888e-12	4.51352e-10
SERPINB9	kgCluster23194	1792.93	660.801	2925.06	4.42653	2.14618	5.78111e-12	4.60151e-10
NFKB2	kgCluster3749	2387.94	912.707	3863.17	4.23265	2.08156	5.76072e-12	4.60151e-10
EEPD1	kgCluster26380	511.669	991.706	31.6315	0.031896	-4.97048	5.90882e-12	4.6699e-10
SLAMF7	kgCluster1948	3033.74	1136.15	4931.32	4.34039	2.11782	5.91018e-12	4.6699e-10
RPP25	kgCluster9791	204.467	371.512	37.4222	0.100729	-3.31144	6.00389e-12	4.7267e-10
DEPTOR	kgCluster28322	93.4282	184.898	1.95889	0.0105945	-6.56054	6.41027e-12	5.02835e-10
IL2RA	kgCluster2886	2319.49	404.311	4234.66	10.4738	3.38871	6.51988e-12	5.09587e-10
NFKBIZ	kgCluster20073	806.428	304.601	1308.25	4.29497	2.10265	6.73631e-12	5.23906e-10
ABHD2	kgCluster10041	2657.53	4277.06	1038	0.24269	-2.04282	6.75149e-12	5.23906e-10
EIF2AK2	kgCluster15932	1693.21	625.037	2761.37	4.41794	2.14337	7.46349e-12	5.77088e-10
NT5DC2	kgCluster19858	446.906	749.477	144.335	0.192581	-2.37646	7.54974e-12	5.8168e-10
POLD2	kgCluster26441	274.355	447.107	101.603	0.227245	-2.13768	7.67799e-12	5.89462e-10
ACOT11	kgCluster920	260.258	474.794	45.7222	0.0962991	-3.37633	7.96471e-12	6.09314e-10
CERKL	kgCluster17035	232.37	422.809	41.932	0.0991749	-3.33388	8.16601e-12	6.22514e-10
TSPAN15	kgCluster3307	280.383	519.694	41.0717	0.0790305	-3.66145	8.29079e-12	6.29809e-10
JUP	kgCluster12569	1108.65	191.689	2025.62	10.5672	3.40152	9.07983e-12	6.87337e-10
TACC3	kgCluster20871	634.788	1051.32	218.256	0.207603	-2.2681	9.30897e-12	7.02227e-10
PKI55	kgCluster17246	58.0118	101.058	14.966	0.148093	-2.75542	1.02576e-11	7.71105e-10
GNG2	kgCluster8065	497.182	883.838	110.526	0.125052	-2.9994	1.04521e-11	7.83005e-10
MYC	kgCluster28392	198.267	350.683	45.8499	0.130745	-2.93518	1.08773e-11	8.12044e-10
FABP3	kgCluster570	191.645	327.543	55.7475	0.170199	-2.55471	1.14239e-11	8.49919e-10
ZBTB10	kgCluster28120	634.033	185.544	1082.52	5.8343	2.54456	1.17087e-11	8.6813e-10
NUP210	kgCluster19456	825.607	1490.79	160.429	0.107614	-3.21607	1.32197e-11	9.76812e-10
PHF15	kgCluster22645	1398.83	545.865	2251.8	4.12519	2.04446	1.35813e-11	1.00012e-09
LY6E	kgCluster28472	1228.8	436.35	2021.24	4.63217	2.21169	1.37454e-11	1.00878e-09
ZNRF2	kgCluster26323	1348.62	519.511	2177.73	4.19188	2.0676	1.44013e-11	1.05334e-09
MCM7	kgCluster26909	551.274	887.455	215.093	0.24237	-2.04472	1.44508e-11	1.0534e-09
AY927512	kgCluster23193	84.4707	25.7484	143.193	5.56124	2.47541	1.49823e-11	1.08848e-09
PARP10	kgCluster28508	2092.45	813.832	3371.08	4.14223	2.05041	1.68917e-11	1.2231e-09
IFI35	kgCluster12637	931.367	344.345	1518.39	4.40949	2.14061	1.70329e-11	1.22512e-09
C13orf15	kgCluster7351	292.316	476.473	108.158	0.226997	-2.13925	1.70193e-11	1.22512e-09
C15orf48	kgCluster9283	596.191	221.726	970.657	4.37773	2.13018	1.79824e-11	1.28914e-09
KIAA1274	kgCluster3320	76.1875	150.539	1.83552	0.0121929	-6.35781	1.88135e-11	1.34427e-09
THADA	kgCluster15981	461.486	752.975	169.996	0.225766	-2.1471	1.90965e-11	1.36e-09
GATM	kgCluster9279	716.727	1256.07	177.38	0.141218	-2.82401	1.99542e-11	1.41642e-09
TMC8	kgCluster13203	109.679	212.137	7.22035	0.0340362	-4.87678	2.00442e-11	1.41816e-09
SLC7A1	kgCluster7263	478.129	776.977	179.281	0.230741	-2.11565	2.04485e-11	1.44205e-09
CGNL1	kgCluster9448	189.474	27.6735	351.274	12.6935	3.66602	2.07047e-11	1.45538e-09
OTOA	kgCluster10857	77.6875	141.581	13.7942	0.0974302	-3.35949	2.15759e-11	1.51171e-09
TRIP10	kgCluster14051	755.6	282.131	1229.07	4.35638	2.12313	2.20138e-11	1.53741e-09
GPR132	kgCluster8707	1177.35	295.721	2058.99	6.96259	2.79962	2.40371e-11	1.67332e-09
MMD	kgCluster12867	656.799	1142.29	171.308	0.149969	-2.73726	2.45547e-11	1.70387e-09
KIAA1958	kgCluster29388	188.426	31.0944	345.758	11.1196	3.47503	2.57286e-11	1.77963e-09
C1orf162	kgCluster1318	399.82	652.957	146.683	0.224644	-2.15429	2.75101e-11	1.8968e-09
VAMP5	kgCluster16293	281.019	84.9958	477.042	5.61253	2.48865	2.77831e-11	1.90953e-09
SLC19A1	kgCluster18623	127.894	247.282	8.50642	0.0343997	-4.86146	2.98427e-11	2.0446e-09
C20orf160	kgCluster17834	230.932	3.46599	458.398	132.256	7.04719	3.28331e-11	2.24239e-09
CCL18	kgCluster12358	345.655	115.767	575.543	4.97158	2.31371	3.30413e-11	2.24951e-09
LTC4S	kgCluster23108	32.3751	62.5962	2.15395	0.0344103	-4.86102	3.35737e-11	2.27859e-09
MS4A6A	kgCluster4842	815.675	1420.07	211.283	0.148784	-2.74871	3.4395e-11	2.32704e-09
EPN2	kgCluster12083	75.7535	133.688	17.8191	0.133289	-2.90737	3.46778e-11	2.33886e-09
AK055323	kgCluster20543	108.05	196.639	19.4596	0.0989609	-3.337	3.81406e-11	2.56442e-09
RNASE6	kgCluster7770	551.577	900.964	202.189	0.224414	-2.15576	4.05588e-11	2.71857e-09
APOL6	kgCluster19021	3438.61	1377.57	5499.65	3.99229	1.99722	4.12421e-11	2.75584e-09
DUSP7	kgCluster19840	248.091	431.23	64.9513	0.150619	-2.73103	4.33045e-11	2.88475e-09
C5orf56	kgCluster22612	272.289	98.5858	445.992	4.5239	2.17757	4.44063e-11	2.94907e-09
C1QTNF1	kgCluster13225	277.801	5.9159	549.686	92.9166	6.53786	4.58452e-11	3.03428e-09
GTPBP1	kgCluster19145	1643.08	650.075	2636.09	4.05505	2.01972	4.59697e-11	3.03428e-09
ATP6V0E2	kgCluster27466	239.133	397.08	81.1856	0.204456	-2.29014	4.73432e-11	3.11544e-09
ROBO1	kgCluster19996	148.187	15.1052	281.27	18.6207	4.21883	4.85601e-11	3.18584e-09
LOC100132891	kgCluster28080	509.122	159.426	858.817	5.38693	2.42946	4.90871e-11	3.21068e-09
ADAMTS14	kgCluster3322	279.558	13.512	545.603	40.3791	5.33554	4.99513e-11	3.24832e-09
PARP10	kgCluster28509	842.85	331.443	1354.26	4.08595	2.03067	4.99626e-11	3.24832e-09
SPATA12	kgCluster19899	45.3869	86.645	4.1288	0.0476519	-4.39132	5.38515e-11	3.49067e-09
TXNRD3	kgCluster20258	81.6319	144.502	18.7623	0.129841	-2.94518	5.43536e-11	3.5127e-09
B4GALT5	kgCluster18106	2606.62	1036.54	4176.71	4.02947	2.01059	5.50821e-11	3.54919e-09
SOX5	kgCluster6124	73.0794	2.40671	143.752	59.7297	5.90038	5.72354e-11	3.677e-09
MOV10	kgCluster1337	1520.34	605.275	2435.41	4.02364	2.0085	5.87548e-11	3.76344e-09
FSD1L	kgCluster29332	560.164	167.517	952.812	5.68786	2.50789	6.20629e-11	3.9636e-09
TAP1	kgCluster23802	2480.79	992.305	3969.28	4.00006	2.00002	6.30565e-11	4.01521e-09
TTC39A	kgCluster872	31.424	3.30138	59.5466	18.0369	4.17288	6.41956e-11	4.05341e-09
PLXDC2	kgCluster2989	940.634	1516.45	364.815	0.240571	-2.05546	6.4218e-11	4.05341e-09
SCARB1	kgCluster7090	795.429	1272.44	318.422	0.250246	-1.99858	6.39978e-11	4.05341e-09
CCL8	kgCluster12319	824.106	239.196	1409.02	5.89064	2.55842	6.4489e-11	4.05868e-09
FLJ90757	kgCluster13253	470.226	764.751	175.701	0.22975	-2.12186	6.53927e-11	4.10363e-09
PRKACB	kgCluster1081	881.059	1548.92	213.202	0.137646	-2.86097	6.86071e-11	4.2929e-09
HLA-DMB	kgCluster23805	960.908	1695.33	226.489	0.133596	-2.90405	7.58159e-11	4.71671e-09
TARBP1	kgCluster2690	256.849	423.508	90.1895	0.212958	-2.23136	7.56777e-11	4.71671e-09
ARHGAP9	kgCluster6529	512.536	829.387	195.685	0.235939	-2.08352	7.6331e-11	4.73515e-09
CCL15	kgCluster12356	128.396	4.39735	252.396	57.3972	5.84291	7.80145e-11	4.82575e-09
RAPGEF2	kgCluster21762	2141.65	865.424	3417.88	3.94937	1.98162	8.1671e-11	5.03754e-09
SPRY2	kgCluster7535	254.402	472.043	36.7607	0.0778758	-3.68268	8.58966e-11	5.27583e-09
CXCL2	kgCluster21299	426.147	142.131	710.163	4.99653	2.32093	8.60215e-11	5.27583e-09
RUNX2	kgCluster24157	567.857	114.034	1021.68	8.95941	3.1634	8.6951e-11	5.31777e-09
CFB	kgCluster23760	4711.75	1846.64	7576.86	4.10306	2.0367	8.81034e-11	5.37307e-09
PLAGL2	kgCluster17838	1268.39	492.939	2043.84	4.14622	2.0518	8.85803e-11	5.38698e-09
PDGFRL	kgCluster27723	366.213	2.88312	729.544	253.04	7.98322	9.17217e-11	5.5624e-09
PPM1L	kgCluster20542	177.726	290.357	65.0947	0.224188	-2.15722	9.20733e-11	5.56812e-09
CD163L1	kgCluster5930	1758.78	3193.09	324.475	0.101618	-3.29878	9.23383e-11	5.56859e-09
ZBED3	kgCluster22362	76.9445	134.554	19.3346	0.143693	-2.79893	9.27651e-11	5.57879e-09
PFAS	kgCluster11918	293.794	496.928	90.6599	0.182441	-2.4545	9.32223e-11	5.59075e-09
C8orf55	kgCluster28463	141.152	240.445	41.8592	0.17409	-2.52209	9.45224e-11	5.65307e-09
C20orf160	kgCluster17833	237.14	4.27353	470.007	109.981	6.78111	9.56146e-11	5.70264e-09
SGK1	kgCluster24618	1263.64	2012.45	514.842	0.255829	-1.96675	9.59494e-11	5.70688e-09
MXD4	kgCluster20881	460.159	744.836	175.482	0.235598	-2.0856	1.00918e-10	5.98594e-09
PLSCR1	kgCluster20431	1431.52	574.265	2288.78	3.98557	1.99479	1.07298e-10	6.34702e-09
TMEM223	kgCluster4932	66.6563	114.025	19.2878	0.169155	-2.56358	1.08425e-10	6.39617e-09
NFIA	kgCluster962	111.514	214.245	8.78292	0.0409948	-4.60842	1.12401e-10	6.61274e-09
RHOBTB1	kgCluster3257	340.6	639.826	41.3742	0.0646648	-3.95087	1.1339e-10	6.65285e-09
HIVEP3	kgCluster739	476.771	814.353	139.19	0.170921	-2.5486	1.20854e-10	7.07158e-09
HIST2H4A	kgCluster1598	54.9527	15.671	94.2343	6.0133	2.58816	1.23691e-10	7.21808e-09
PPP3CC	kgCluster27761	621.551	229.647	1013.45	4.4131	2.14179	1.27445e-10	7.41719e-09
N4BP2L1	kgCluster7290	780.564	315.73	1245.4	3.9445	1.97984	1.34079e-10	7.78231e-09
NCF1B	kgCluster26660	859.593	282.446	1436.74	5.08676	2.34675	1.34535e-10	7.78793e-09
PARP9	kgCluster20212	2713.46	1085.96	4340.96	3.99735	1.99904	1.40923e-10	8.13593e-09
AX747067	kgCluster17245	31.8554	56.9365	6.7743	0.11898	-3.07121	1.42708e-10	8.21708e-09
FOXRED2	kgCluster19032	458.117	827.399	88.8344	0.107366	-3.21939	1.47453e-10	8.46782e-09
HIVEP2	kgCluster24678	1398.27	369.546	2426.99	6.5675	2.71534	1.51175e-10	8.65856e-09
SHB	kgCluster28870	216.835	386.305	47.3642	0.122608	-3.02787	1.5886e-10	9.07471e-09
NPM3	kgCluster3736	89.4254	149.716	29.1345	0.194598	-2.36143	1.70579e-10	9.71851e-09
LRMP	kgCluster6129	179.474	312.631	46.3171	0.148153	-2.75484	1.71215e-10	9.72914e-09
DPY19L3	kgCluster14609	239.383	392.915	85.8512	0.218498	-2.19431	1.75173e-10	9.92802e-09
EDARADD	kgCluster2713	171.578	30.7139	312.442	10.1727	3.34663	1.81947e-10	1.0285e-08
KCNE1	kgCluster18464	271.943	52.708	491.177	9.31883	3.22015	1.86104e-10	1.04706e-08
AQP9	kgCluster9453	2854.41	1209.58	4499.23	3.71966	1.89517	1.86198e-10	1.04706e-08
BLZF1	kgCluster2096	925.844	354.605	1497.08	4.22183	2.07787	1.96384e-10	1.10148e-08
ALDH4A1	kgCluster349	447.364	723.339	171.389	0.236942	-2.0774	2.01558e-10	1.12758e-08
TGFBR2	kgCluster19548	1688.11	2659.06	717.152	0.269701	-1.89057	2.05426e-10	1.14626e-08
DNMT3A	kgCluster15802	432.918	699.037	166.8	0.238614	-2.06725	2.16759e-10	1.20638e-08
CYP7B1	kgCluster28024	77.9942	5.92078	150.067	25.3459	4.66368	2.27074e-10	1.25782e-08
MB21D1	kgCluster24296	560.544	224.55	896.539	3.9926	1.99733	2.27162e-10	1.25782e-08
NBN	kgCluster28164	2237.38	933.73	3541.04	3.79236	1.92309	2.2891e-10	1.26426e-08
LOC285758	kgCluster24487	328.834	55.3271	602.34	10.8869	3.44452	2.32766e-10	1.28229e-08
MIPEP	kgCluster7209	176.378	290.161	62.5953	0.215726	-2.21273	2.40121e-10	1.31945e-08
CARD9	kgCluster29743	282.2	452.702	111.698	0.246737	-2.01895	2.48495e-10	1.36201e-08
PLEKHG4	kgCluster11328	27.4871	49.7834	5.19087	0.104269	-3.26162	2.50853e-10	1.37145e-08
LINC00085	kgCluster15348	65.0739	10.8051	119.343	11.045	3.46532	2.53511e-10	1.3825e-08
MAP1LC3A	kgCluster17878	396.503	27.2871	765.719	28.0616	4.81052	2.57234e-10	1.39927e-08
PTPN2	kgCluster13492	1135.53	457.471	1813.58	3.96437	1.98709	2.63723e-10	1.43098e-08
ZNFX1	kgCluster18097	5032.79	2124.19	7941.4	3.73856	1.90248	2.66134e-10	1.44045e-08
FUT4	kgCluster5396	1156.86	475.18	1838.55	3.86916	1.95202	2.80033e-10	1.5119e-08
SNRNP25	kgCluster10437	204.587	333.267	75.9062	0.227764	-2.13439	2.81512e-10	1.51611e-08
PRKDC	kgCluster27943	2613.53	4090.9	1136.16	0.277728	-1.84825	2.84471e-10	1.52824e-08
A4GALT	kgCluster19232	158.023	7.03824	309.008	43.9042	5.45629	3.01788e-10	1.61326e-08
GLCCI1	kgCluster26186	149.024	268.619	29.4283	0.109554	-3.19028	3.01751e-10	1.61326e-08
ABAT	kgCluster10704	160.083	261.129	59.0374	0.226085	-2.14506	3.16637e-10	1.68847e-08
CD38	kgCluster21015	1141.78	189.408	2094.15	11.0563	3.46679	3.35872e-10	1.78664e-08
ELK3	kgCluster6760	209.623	332.357	86.8895	0.261434	-1.93548	3.4295e-10	1.81982e-08
STK32C	kgCluster3977	208.641	339.163	78.1183	0.230326	-2.11825	3.55811e-10	1.88345e-08
PNMA2	kgCluster27805	98.2379	32.7286	163.747	5.00318	2.32284	3.72812e-10	1.96863e-08
RFTN1	kgCluster19500	1459.95	600.002	2319.9	3.86649	1.95102	3.74997e-10	1.97535e-08
CTTNBP2	kgCluster27111	62.9837	111.742	14.2255	0.127306	-2.97363	3.9054e-10	2.05223e-08
EREG	kgCluster21304	1233.48	87.2024	2379.76	27.29	4.7703	3.99411e-10	2.09376e-08
DDX60L	kgCluster21793	3554.5	1511.23	5597.78	3.70413	1.88914	4.21272e-10	2.20303e-08
TAP2	kgCluster23799	2620.15	1086.25	4154.06	3.82422	1.93517	4.30996e-10	2.24845e-08
RIPK2	kgCluster28162	1010.51	423.535	1597.48	3.77177	1.91524	4.32191e-10	2.24926e-08
DTNA	kgCluster13587	190.097	313.472	66.7218	0.212848	-2.23211	4.33363e-10	2.24996e-08
EPHB6	kgCluster27363	125.743	219.321	32.1647	0.146656	-2.76949	4.45787e-10	2.30892e-08
AX747521	kgCluster13173	100.447	32.4417	168.453	5.19247	2.37642	4.49157e-10	2.32082e-08
SNX10	kgCluster26273	2200.88	874.704	3527.06	4.03229	2.0116	4.56129e-10	2.35124e-08
CSRP2	kgCluster6667	59.5001	7.76108	111.239	14.333	3.84126	4.64038e-10	2.38632e-08
PLK3	kgCluster799	667.08	284.162	1050	3.69506	1.8856	4.68763e-10	2.40491e-08
TIMM21	kgCluster13775	197.06	315.874	78.2465	0.247714	-2.01325	4.86338e-10	2.48918e-08
MAML3	kgCluster21638	147.926	266.845	29.008	0.108707	-3.20148	4.95615e-10	2.53068e-08
CLEC5A	kgCluster27313	829.701	1600.36	59.0381	0.0368904	-4.76061	5.01295e-10	2.54914e-08
SLC43A1	kgCluster4768	116.428	222.436	10.4204	0.0468465	-4.41591	5.03941e-10	2.54914e-08
ZHX2	kgCluster28331	465.112	187.87	742.354	3.95142	1.98237	5.01595e-10	2.54914e-08
DCP1A	kgCluster19878	1305.56	558.675	2052.45	3.67379	1.87727	5.031e-10	2.54914e-08
NCF1C	kgCluster26705	1023.97	391.393	1656.54	4.23242	2.08148	5.16374e-10	2.60594e-08
STK17A	kgCluster26424	732.136	290.018	1174.25	4.0489	2.01753	5.20854e-10	2.62244e-08
TP53INP2	kgCluster17880	1694.74	521.905	2867.57	5.49443	2.45797	5.31202e-10	2.66834e-08
HAPLN3	kgCluster10039	427.969	63.201	792.738	12.5431	3.64883	5.51506e-10	2.76391e-08
AVIL	kgCluster6557	56.3561	17.5807	95.1316	5.41114	2.43593	5.60609e-10	2.80304e-08
CLEC3B	kgCluster19670	16.5552	32.4854	0.625043	0.0192407	-5.69969	5.89579e-10	2.9411e-08
APOBEC3F	kgCluster19153	1144.11	336.571	1951.65	5.79863	2.53571	5.96604e-10	2.9693e-08
C22orf45	kgCluster18870	103.381	16.556	190.206	11.4886	3.52213	5.98246e-10	2.9698e-08
IL8	kgCluster21290	1415.7	597.783	2233.61	3.73649	1.90168	6.0082e-10	2.9698e-08
MXD1	kgCluster16158	2561.43	1132.36	3990.5	3.52405	1.81723	6.00783e-10	2.9698e-08
PTCRA	kgCluster24104	18.2816	33.6037	2.9594	0.0880677	-3.50524	6.11824e-10	3.01731e-08
MT1DP	kgCluster11227	11.3391	0.180691	22.4975	124.508	6.9601	6.22197e-10	3.06149e-08
AX748417	kgCluster19401	220.098	356.009	84.1873	0.236475	-2.08024	6.28415e-10	3.08508e-08
LSS	kgCluster18630	2547.94	1022.06	4073.83	3.98592	1.99491	6.3119e-10	3.09169e-08
SLC7A8	kgCluster7865	1729.79	2753.11	706.459	0.256604	-1.96239	6.34411e-10	3.10045e-08
SGMS2	kgCluster21495	277.952	439.493	116.411	0.264875	-1.91662	6.37036e-10	3.10627e-08
GBP5	kgCluster1130	1915.6	521.706	3309.49	6.3436	2.6653	6.51031e-10	3.16737e-08
CAMK1	kgCluster19400	523.623	851.493	195.752	0.229893	-2.12097	6.58025e-10	3.19375e-08
TNFSF13B	kgCluster7630	1502.4	633.02	2371.79	3.74678	1.90565	6.59403e-10	3.19375e-08
LOC653786	kgCluster10888	78.0968	149.512	6.68183	0.044691	-4.48387	6.78478e-10	3.27881e-08
NCF1	kgCluster26694	1115.78	479.56	1752	3.65334	1.86922	6.92851e-10	3.34081e-08
GNB1L	kgCluster18724	52.2642	90.1277	14.4008	0.159782	-2.64582	7.19182e-10	3.46007e-08
CDR2L	kgCluster13109	44.8406	83.0342	6.64705	0.0800519	-3.64292	7.78069e-10	3.73508e-08
KAT2A	kgCluster12591	287.54	468.522	106.558	0.227434	-2.13648	8.10193e-10	3.87211e-08
CD40	kgCluster18071	1330.76	551.396	2110.12	3.82686	1.93616	8.0841e-10	3.87211e-08
SPIN4	kgCluster30369	62.1218	104.864	19.38	0.184812	-2.43587	8.2765e-10	3.94683e-08
GGTA1P	kgCluster29453	213.833	376.041	51.6249	0.137285	-2.86475	8.3354e-10	3.96618e-08
IFITM3	kgCluster4024	642.151	238.683	1045.62	4.38078	2.13119	8.70726e-10	4.13404e-08
H1F0	kgCluster19113	1391.64	593.461	2189.82	3.6899	1.88358	9.00107e-10	4.26418e-08
MAP3K13	kgCluster20685	744.805	315.773	1173.84	3.71734	1.89427	9.22694e-10	4.36164e-08
SGPP2	kgCluster17335	231.363	15.9801	446.747	27.9565	4.80511	9.33883e-10	4.40492e-08
MEFV	kgCluster10647	538.383	112.075	964.692	8.60756	3.1056	1.0034e-09	4.72251e-08
LOC440896	kgCluster28972	375.477	13.3269	737.628	55.3489	5.79048	1.07251e-09	5.03683e-08
TMPRSS13	kgCluster5574	102.77	27.0716	178.468	6.59246	2.72082	1.07931e-09	5.05782e-08
C5orf41	kgCluster23012	1460.06	689.464	2230.65	3.23534	1.69392	1.10192e-09	5.15262e-08
NOXA1	kgCluster29816	58.5025	105.012	11.9934	0.114211	-3.13023	1.12207e-09	5.23149e-08
GBP2	kgCluster1127	1880.88	789.109	2972.65	3.7671	1.91345	1.12604e-09	5.23149e-08
KYNU	kgCluster16806	1490.04	633.029	2347.04	3.70764	1.8905	1.1259e-09	5.23149e-08
ZNF366	kgCluster22326	287.677	121.854	453.5	3.72167	1.89595	1.13393e-09	5.25689e-08
TRERF1	kgCluster24094	503.543	840.746	166.339	0.197847	-2.33755	1.18554e-09	5.48436e-08
C1S	kgCluster5921	463.293	44.8407	881.745	19.6639	4.29748	1.19141e-09	5.4998e-08
ACPL2	kgCluster20404	91.8763	32.0676	151.685	4.73017	2.24189	1.20981e-09	5.57286e-08
HCP5	kgCluster23712	648.646	289.587	1007.7	3.47979	1.799	1.23089e-09	5.65792e-08
AX747758	kgCluster19027	132.533	48.2028	216.863	4.49897	2.16959	1.25632e-09	5.76258e-08
ARNT2	kgCluster9897	517.192	24.8121	1009.57	40.6887	5.34655	1.28301e-09	5.87255e-08
ZNF589	kgCluster19724	375.589	594.962	156.217	0.262566	-1.92925	1.28722e-09	5.8794e-08
MTSS1	kgCluster28364	871.661	1362.24	381.085	0.27975	-1.83779	1.30914e-09	5.9669e-08
DYNC2H1	kgCluster5448	63.6719	110.548	16.7962	0.151936	-2.71846	1.33069e-09	6.05242e-08
IL3RA	kgCluster31071	181.029	19.8566	342.2	17.2336	4.10715	1.37023e-09	6.21919e-08
FW340055	kgCluster16159	74.5405	16.7944	132.287	7.87683	2.97761	1.37395e-09	6.22303e-08
ETV3	kgCluster1871	658.055	277.329	1038.78	3.74566	1.90522	1.38574e-09	6.25773e-08
FOSL2	kgCluster15874	3040.23	1330.24	4750.21	3.57094	1.8363	1.38739e-09	6.25773e-08
C1orf122	kgCluster678	704.379	291.999	1116.76	3.82452	1.93528	1.39791e-09	6.29203e-08
LOC645638	kgCluster12941	138.27	17.8246	258.716	14.5145	3.85943	1.41082e-09	6.33697e-08
SLC25A10	kgCluster13283	330.68	522.549	138.811	0.265643	-1.91244	1.43908e-09	6.45052e-08
SLC45A4	kgCluster28447	422.686	732.735	112.636	0.15372	-2.70163	1.45528e-09	6.50969e-08
2019-03-01	kgCluster2542	38.4537	72.6741	4.23335	0.0582511	-4.10157	1.54609e-09	6.9016e-08
ACY1	kgCluster19837	194.004	311.352	76.6563	0.246204	-2.02207	1.57173e-09	7.00165e-08
EDA	kgCluster30395	36.687	68.4791	4.895	0.0714816	-3.80628	1.65098e-09	7.33958e-08
TBC1D9	kgCluster21647	2547.68	1104.68	3990.68	3.61252	1.85301	1.66517e-09	7.3875e-08
ARHGAP6	kgCluster29989	85.3378	145.874	24.802	0.170024	-2.55619	1.72837e-09	7.65218e-08
SLC9A7	kgCluster30188	164.808	269.103	60.5137	0.224872	-2.15282	1.74678e-09	7.71793e-08
PYGL	kgCluster8057	1210.26	1882.29	538.222	0.28594	-1.80621	1.79605e-09	7.91947e-08
ABCA2	kgCluster29785	235.797	372.883	98.7112	0.264724	-1.91744	1.84002e-09	8.09686e-08
FAM26F	kgCluster24503	615.887	67.8133	1163.96	17.1642	4.10133	1.93392e-09	8.49278e-08
IL3RA	kgCluster29917	182.051	18.7162	345.386	18.4538	4.20585	1.93842e-09	8.49532e-08
FAM105A	kgCluster22015	671.823	1065.31	278.334	0.26127	-1.93639	1.95557e-09	8.55317e-08
TMEM86A	kgCluster4382	768.8	1215.81	321.785	0.264666	-1.91775	2.00381e-09	8.74648e-08
C1orf122	kgCluster677	744.602	313.047	1176.16	3.75713	1.90963	2.02228e-09	8.80933e-08
C19orf66	kgCluster14149	795.548	353	1238.1	3.50736	1.81038	2.05566e-09	8.93677e-08
INSR	kgCluster14062	259.949	411.942	107.956	0.262065	-1.932	2.08694e-09	9.05126e-08
MGAT5	kgCluster16780	1939.89	3024.06	855.715	0.282969	-1.82128	2.09036e-09	9.05126e-08
LRRC45	kgCluster13302	131.156	227.326	34.9851	0.153898	-2.69995	2.12827e-09	9.19701e-08
RBFA	kgCluster13807	89.4263	147.093	31.7596	0.215915	-2.21146	2.18794e-09	9.43603e-08
LOC100293534	kgCluster23767	78.3531	13.3206	143.386	10.7642	3.42816	2.33217e-09	1.00381e-07
ULK3	kgCluster9786	430.345	675.674	185.015	0.273823	-1.86868	2.34084e-09	1.00554e-07
STRBP	kgCluster29491	111.7	180.249	43.151	0.239397	-2.06252	2.3566e-09	1.0103e-07
ATP8A1	kgCluster21123	510.205	898.027	122.383	0.13628	-2.87536	2.46279e-09	1.05374e-07
PLEKHN1	kgCluster33	69.9506	6.46419	133.437	20.6425	4.36755	2.48541e-09	1.06133e-07
C6orf223	kgCluster24140	73.0841	1.96569	144.203	73.3599	6.19692	2.5912e-09	1.10432e-07
CHCHD6	kgCluster20260	40.3583	72.0788	8.6379	0.11984	-3.06082	2.61914e-09	1.11404e-07
BC133032	kgCluster2720	11.3786	0.198948	22.5583	113.388	6.82512	2.76266e-09	1.17278e-07
ELOVL7	kgCluster22215	675.406	40.8705	1309.94	32.0511	5.0023	2.78426e-09	1.17963e-07
CSF2RB	kgCluster19039	4439.71	1968.82	6910.6	3.51002	1.81148	2.89587e-09	1.22452e-07
GBP7	kgCluster1128	60.3096	3.34867	117.27	35.02	5.13011	2.94643e-09	1.23864e-07
ZNF503	kgCluster3401	169.155	302.998	35.3109	0.116538	-3.10112	2.94282e-09	1.23864e-07
ADAT2	kgCluster24681	106.696	187.463	25.9283	0.138312	-2.854	2.943e-09	1.23864e-07
RICTOR	kgCluster22111	1381.54	621.847	2141.24	3.44336	1.78382	2.98389e-09	1.25196e-07
SH3TC1	kgCluster20954	832.751	1286.38	379.123	0.294721	-1.76258	2.99289e-09	1.25331e-07
IL27RA	kgCluster14296	207.057	325.819	88.2938	0.27099	-1.88369	3.06004e-09	1.27896e-07
PARP14	kgCluster20215	6843.65	3067.34	10620	3.46226	1.79172	3.28428e-09	1.37003e-07
ASPHD2	kgCluster18896	126.118	48.8223	203.414	4.16642	2.05881	3.30692e-09	1.37633e-07
BAIAP2	kgCluster13254	421.587	674.066	169.108	0.250877	-1.99495	3.3121e-09	1.37633e-07
ENPP2	kgCluster28319	1272.76	101.456	2444.06	24.0898	4.59035	3.50699e-09	1.45266e-07
HLTF	kgCluster20443	300.481	489.358	111.605	0.228063	-2.13249	3.50921e-09	1.45266e-07
NINJ2	kgCluster5799	87.9144	145.594	30.2347	0.207664	-2.26768	3.55344e-09	1.46817e-07
CAD	kgCluster15841	678.702	1063.69	293.712	0.276125	-1.85661	3.73426e-09	1.53994e-07
MARCKSL1	kgCluster595	415.457	169.541	661.374	3.90097	1.96383	3.98738e-09	1.64119e-07
LRRC32	kgCluster5284	106.159	20.2	192.118	9.51081	3.24957	4.02238e-09	1.65246e-07
IL7	kgCluster28113	146.994	25.6307	268.358	10.4702	3.38821	4.04759e-09	1.65738e-07
C6orf108	kgCluster24119	166.559	266.128	66.9891	0.251717	-1.99012	4.04968e-09	1.65738e-07
OPTN	kgCluster2929	1405.9	656.64	2155.16	3.28211	1.71462	4.27304e-09	1.7455e-07
C1orf127	kgCluster202	52.5681	102.638	2.49821	0.02434	-5.36053	4.32591e-09	1.76377e-07
SDCCAG3	kgCluster29745	337.743	533.885	141.601	0.265228	-1.9147	4.35593e-09	1.77267e-07
FLJ33630	kgCluster22586	107.525	187.209	27.8407	0.148715	-2.74938	4.60036e-09	1.86863e-07
FAM78A	kgCluster29648	801.018	1249.28	352.759	0.282371	-1.82434	4.61639e-09	1.87163e-07
COLEC12	kgCluster13368	1016.52	1919.71	113.319	0.0590289	-4.08244	4.62617e-09	1.87209e-07
KIAA0226	kgCluster20817	1865.32	881.356	2849.28	3.23283	1.6928	4.79113e-09	1.93522e-07
EXOSC5	kgCluster14907	64.962	110.751	19.1726	0.173114	-2.53021	4.8489e-09	1.95491e-07
STAT4	kgCluster17085	831.887	168.593	1495.18	8.86857	3.1487	4.88284e-09	1.96493e-07
HIST1H2BK	kgCluster23458	285.269	125.54	444.998	3.54468	1.82565	5.10437e-09	2.05027e-07
CD93	kgCluster17761	2004.33	3458.58	550.086	0.159049	-2.65245	5.12178e-09	2.05345e-07
ZBTB46	kgCluster18264	271.644	128.593	414.695	3.22486	1.68924	5.1333e-09	2.05427e-07
ADM	kgCluster4298	1412.33	601.64	2223.02	3.69493	1.88555	5.18106e-09	2.06956e-07
CHCHD10	kgCluster18837	162.049	259.556	64.5412	0.24866	-2.00775	5.26097e-09	2.09761e-07
CCL20	kgCluster17367	171.46	11.6226	331.298	28.5046	4.83312	5.37134e-09	2.13767e-07
VEGFA	kgCluster24136	1241.47	294.224	2188.71	7.43893	2.8951	5.57475e-09	2.21456e-07
FAM129A	kgCluster2260	2127.06	918.079	3336.04	3.63372	1.86145	5.65817e-09	2.24358e-07
TNIP1	kgCluster22866	2664.57	1201.68	4127.45	3.43473	1.7802	5.71376e-09	2.26148e-07
FAM20A	kgCluster13050	1126.77	243.269	2010.27	8.26358	3.04677	5.87079e-09	2.31939e-07
PSTPIP2	kgCluster13631	1773.22	779.946	2766.49	3.54703	1.82661	6.10685e-09	2.40826e-07
ATP10A	kgCluster8914	464.642	115.145	814.138	7.07053	2.82182	6.13746e-09	2.41593e-07
TRIM22	kgCluster4192	1920.45	880.918	2959.99	3.36011	1.74851	6.34193e-09	2.48737e-07
VARS	kgCluster23749	650.869	998.97	302.767	0.303079	-1.72223	6.34103e-09	2.48737e-07
SERPINA1	kgCluster8468	1345.8	584.405	2107.2	3.60573	1.85029	6.39198e-09	2.50247e-07
PIK3R6	kgCluster11933	264.535	418.131	110.938	0.265319	-1.9142	6.65472e-09	2.60062e-07
FPR2	kgCluster15351	528.574	163.285	893.863	5.47424	2.45266	6.72252e-09	2.62239e-07
APOBEC3H	kgCluster19154	26.4006	3.12617	49.6751	15.8901	3.99006	6.74689e-09	2.62716e-07
ME1	kgCluster24334	537.498	931.037	143.959	0.154623	-2.69318	6.77665e-09	2.63401e-07
C15orf27	kgCluster9834	70.2214	116.591	23.8518	0.204577	-2.28928	6.86885e-09	2.66506e-07
CEMP1	kgCluster10578	182.859	291.815	73.9042	0.253257	-1.98133	6.92912e-09	2.68364e-07
LOC541471	kgCluster16546	89.8108	160.464	19.158	0.119392	-3.06622	7.12036e-09	2.75278e-07
CXCL5	kgCluster21296	1144.62	339.329	1949.91	5.74637	2.52265	7.17749e-09	2.76992e-07
LOC100293534	kgCluster23772	92.675	24.9603	160.39	6.42579	2.68387	7.86226e-09	3.02879e-07
JAK2	kgCluster28600	1338.94	602.226	2075.66	3.44665	1.7852	7.93323e-09	3.04529e-07
ERCC1	kgCluster15035	383.797	592.443	175.15	0.29564	-1.75809	7.92392e-09	3.04529e-07
MAP3K8	kgCluster3066	969.47	402.877	1536.06	3.81273	1.93082	7.9767e-09	3.05656e-07
HTR7	kgCluster3588	98.9595	188.261	9.65846	0.0513037	-4.28479	7.99714e-09	3.05897e-07
LYL1	kgCluster14273	259.357	407.59	111.123	0.272635	-1.87496	8.37383e-09	3.19742e-07
DKFZP586I1420	kgCluster26326	526.225	181.02	871.429	4.81399	2.26723	8.67212e-09	3.30548e-07
LOC100506585	kgCluster27552	311.988	592.959	31.0164	0.0523079	-4.25683	8.75635e-09	3.33172e-07
LOC728723	kgCluster22364	34.8535	66.0511	3.65583	0.0553484	-4.17531	9.27408e-09	3.52252e-07
ETV7	kgCluster24011	380.683	11.2443	750.122	66.7114	6.05986	9.56342e-09	3.62606e-07
TSC22D2	kgCluster20458	761.861	342.383	1181.34	3.45035	1.78674	9.68592e-09	3.66609e-07
C9orf40	kgCluster29037	85.5079	137.747	33.2692	0.241525	-2.04976	9.76943e-09	3.68549e-07
IL4I1	kgCluster15254	2703.85	1246.49	4161.21	3.33834	1.73913	9.77122e-09	3.68549e-07
NCAPH	kgCluster16399	365.798	669.174	62.4226	0.0932831	-3.42224	9.84052e-09	3.69233e-07
CXCL1	kgCluster21293	500.357	173.098	827.616	4.7812	2.25737	9.81424e-09	3.69233e-07
SLFN5	kgCluster12333	1727.32	801.725	2652.92	3.30902	1.7264	9.83852e-09	3.69233e-07
IFIT1B	kgCluster3575	38.5947	7.3662	69.8232	9.47887	3.24471	1.01495e-08	3.80167e-07
PSMB9	kgCluster23803	514.83	227.33	802.33	3.52936	1.81941	1.02442e-08	3.83052e-07
BTG1	kgCluster6721	1521.3	712.073	2330.52	3.27287	1.71055	1.06412e-08	3.97212e-07
GCSH	kgCluster11503	87.5501	143.929	31.1714	0.216575	-2.20706	1.06673e-08	3.97497e-07
LOC728431	kgCluster665	204.338	49.196	359.479	7.30708	2.8693	1.0693e-08	3.9777e-07
FILIP1L	kgCluster20049	760.184	174.303	1346.07	7.72257	2.94908	1.08321e-08	4.02254e-07
FES	kgCluster10077	601.653	969.739	233.567	0.240856	-2.05376	1.10291e-08	4.08868e-07
LOC389634	kgCluster5954	77.2129	7.4135	147.012	19.8304	4.30964	1.13145e-08	4.18733e-07
DBP	kgCluster15160	195.775	345.518	46.0319	0.133226	-2.90805	1.13511e-08	4.1937e-07
TRANK1	kgCluster19574	2579.23	645.797	4512.67	6.98775	2.80483	1.14713e-08	4.23088e-07
NFATC2	kgCluster18125	58.0315	110.795	5.2685	0.047552	-4.39435	1.16842e-08	4.30208e-07
NFE2L3	kgCluster26270	926.183	231.101	1621.27	7.01539	2.81052	1.18854e-08	4.36874e-07
TRADD	kgCluster11313	565.78	254.534	877.025	3.4456	1.78476	1.22454e-08	4.49343e-07
LIMK2	kgCluster18976	1753.12	509.608	2996.64	5.88027	2.55588	1.31682e-08	4.82276e-07
NDUFAF2	kgCluster22217	55.0394	91.9373	18.1415	0.197324	-2.34136	1.31874e-08	4.82276e-07
SUCNR1	kgCluster20481	310.411	527.954	92.868	0.175902	-2.50716	1.34637e-08	4.91549e-07
MTMR11	kgCluster1605	35.9429	9.30062	62.5852	6.72914	2.75042	1.37218e-08	5.00128e-07
PIM3	kgCluster19318	1487.45	686.614	2288.29	3.33271	1.7367	1.42718e-08	5.19302e-07
EPAS1	kgCluster16002	2160.89	3314.9	1006.88	0.303743	-1.71908	1.46032e-08	5.30469e-07
VSIG10L	kgCluster15328	301.791	115.369	488.213	4.23175	2.08125	1.48255e-08	5.37642e-07
MT1L	kgCluster11222	44.4811	1.55604	87.4062	56.1722	5.81179	1.48776e-08	5.3863e-07
CLEC6A	kgCluster5955	75.0078	3.42598	146.59	42.7876	5.41912	1.50177e-08	5.42795e-07
IQCE	kgCluster26127	466.809	728.091	205.526	0.28228	-1.8248	1.5171e-08	5.45603e-07
FAM177A1	kgCluster7972	591.116	266.961	915.27	3.42848	1.77757	1.51266e-08	5.45603e-07
IGSF8	kgCluster1931	709.067	331.608	1086.53	3.27653	1.71217	1.51678e-08	5.45603e-07
CCDC41	kgCluster6741	86.6226	139.429	33.8165	0.242536	-2.04373	1.52494e-08	5.47512e-07
TIAM2	kgCluster24757	383.135	173.819	592.452	3.40844	1.76911	1.53714e-08	5.50977e-07
LOC100287559	kgCluster9746	284.355	115.031	453.679	3.94397	1.97965	1.57842e-08	5.63789e-07
ATP2A3	kgCluster11729	759.935	1203.28	316.593	0.263109	-1.92627	1.57769e-08	5.63789e-07
CDYL2	kgCluster11497	290.211	124.141	456.281	3.67549	1.87794	1.5833e-08	5.63789e-07
CFLAR	kgCluster17139	6107.72	2914.99	9300.46	3.19057	1.67381	1.58148e-08	5.63789e-07
PVRL2	kgCluster15012	2056.76	942.954	3170.57	3.36238	1.74948	1.65234e-08	5.8741e-07
STMN1	kgCluster471	486.881	809.912	163.849	0.202305	-2.3054	1.65842e-08	5.88604e-07
MTSS1L	kgCluster11413	71.1671	122.59	19.7443	0.161059	-2.63434	1.66125e-08	5.88641e-07
AX747844	kgCluster6231	60.3839	115.854	4.91407	0.0424161	-4.55924	1.7118e-08	6.0507e-07
TSPAN33	kgCluster27189	1181.59	471.722	1891.46	4.0097	2.00349	1.7132e-08	6.0507e-07
LOC388692	kgCluster1566	504.155	230.894	777.417	3.36699	1.75146	1.73455e-08	6.11613e-07
SAC3D1	kgCluster5011	88.0807	146.249	29.9123	0.20453	-2.28961	1.75152e-08	6.16591e-07
GPAM	kgCluster3821	162.672	258.721	66.6233	0.25751	-1.9573	1.75833e-08	6.17986e-07
IFT172	kgCluster15857	169.189	276.324	62.0547	0.224572	-2.15475	1.81073e-08	6.35371e-07
AK126253	kgCluster21870	11.6516	1.40318	21.9	15.6074	3.96416	1.84188e-08	6.45255e-07
ARID5B	kgCluster3262	1755.04	501.783	3008.3	5.99522	2.58381	1.87293e-08	6.55073e-07
FTSJD2	kgCluster24034	1597.1	745.901	2448.3	3.28234	1.71472	1.88434e-08	6.58001e-07
LRP3	kgCluster14623	232.604	414.792	50.4162	0.121546	-3.04043	1.91687e-08	6.68281e-07
RBMS2	kgCluster6499	1150.5	551.846	1749.15	3.16963	1.66432	1.92108e-08	6.68672e-07
NTNG2	kgCluster29659	45.9539	6.11425	85.7936	14.0318	3.81062	1.93068e-08	6.69071e-07
GJB2	kgCluster7182	851.224	180.273	1522.17	8.4437	3.07788	1.9315e-08	6.69071e-07
TTC3	kgCluster18490	1519.37	2318.07	720.675	0.310895	-1.6855	1.93049e-08	6.69071e-07
HIST1H3D	kgCluster23371	48.8501	4.18093	93.5193	22.3681	4.48337	1.9549e-08	6.76097e-07
MFSD3	kgCluster28547	70.4331	116.919	23.9475	0.204822	-2.28756	1.97651e-08	6.82478e-07
ASB13	kgCluster2878	335.698	515.58	155.816	0.302216	-1.72635	2.0334e-08	7.01004e-07
EYA2	kgCluster18082	71.7517	142.236	1.26695	0.00890736	-6.81079	2.09136e-08	7.1984e-07
PLCB2	kgCluster9159	1360.97	2235.9	486.049	0.217384	-2.20168	2.14546e-08	7.37289e-07
C16orf88	kgCluster10819	129.152	206.108	52.1946	0.253239	-1.98143	2.16384e-08	7.42426e-07
SLC39A8	kgCluster21470	3767.98	1705.75	5830.21	3.41797	1.77314	2.21311e-08	7.58129e-07
C17orf51	kgCluster12157	169.79	269.251	70.3291	0.261203	-1.93676	2.2261e-08	7.61377e-07
IFITM2	kgCluster4021	573.513	258.504	888.523	3.43718	1.78122	2.28073e-08	7.7883e-07
AF055024	kgCluster17479	106.164	168.382	43.9456	0.260987	-1.93795	2.29179e-08	7.81373e-07
TLR5	kgCluster2569	264.638	519.254	10.0215	0.0192998	-5.69527	2.30251e-08	7.83794e-07
LAD1	kgCluster2336	192.685	6.42866	378.941	58.9455	5.88131	2.31643e-08	7.87295e-07
INHBA	kgCluster26414	332.411	13.7107	651.111	47.4893	5.56953	2.33113e-08	7.90629e-07
SLC1A5	kgCluster15091	422.93	737.48	108.381	0.146961	-2.76649	2.33719e-08	7.90629e-07
SRPRB	kgCluster20347	358.636	553.095	164.176	0.296832	-1.75228	2.33624e-08	7.90629e-07
EVI2B	kgCluster12287	696.702	1076.4	316.999	0.294498	-1.76367	2.35008e-08	7.93748e-07
PLEKHM3	kgCluster17204	1098.13	496.802	1699.46	3.42081	1.77434	2.41687e-08	8.15034e-07
HDX	kgCluster30506	114.929	44.513	185.345	4.16384	2.05791	2.43086e-08	8.17207e-07
IL1B	kgCluster16568	1354.06	619.937	2088.18	3.36838	1.75205	2.43031e-08	8.17207e-07
DIP2C	kgCluster2836	84.5596	148.568	20.5506	0.138324	-2.85387	2.5231e-08	8.46901e-07
METTL21B	kgCluster6555	439.206	165.39	713.021	4.31116	2.10807	2.54535e-08	8.53048e-07
LINC00152	kgCluster16329	64.2477	107.881	20.6148	0.191089	-2.38769	2.56159e-08	8.57164e-07
WDR35	kgCluster15768	85.9293	136.559	35.2999	0.258496	-1.95179	2.57775e-08	8.59913e-07
FHOD1	kgCluster11325	648.142	983.073	313.211	0.318604	-1.65016	2.57398e-08	8.59913e-07
ACN9	kgCluster26863	46.586	78.596	14.5761	0.185456	-2.43085	2.60826e-08	8.67784e-07
PVR	kgCluster15005	1246.12	558.242	1934.01	3.46446	1.79263	2.60936e-08	8.67784e-07
ASS1	kgCluster29636	86.4926	4.10464	168.881	41.1438	5.3626	2.70908e-08	8.99565e-07
MEX3B	kgCluster9909	55.2901	88.7043	21.876	0.246617	-2.01966	2.78558e-08	9.23548e-07
DTX2	kgCluster26749	1036.18	480.305	1592.06	3.3147	1.72888	2.81382e-08	9.31487e-07
SPHK1	kgCluster13169	959.193	445.077	1473.31	3.31024	1.72693	2.82854e-08	9.34928e-07
CDA	kgCluster382	124.213	220.815	27.6113	0.125043	-2.99951	2.85751e-08	9.43066e-07
NOD2	kgCluster11181	820.821	367.936	1273.7	3.46175	1.7915	2.97469e-08	9.80243e-07
LOC100131733	kgCluster6881	106.73	14.899	198.562	13.3272	3.7363	3.00089e-08	9.87374e-07
PCNX	kgCluster8233	3965.7	1819.83	6111.57	3.35832	1.74774	3.08382e-08	1.01312e-06
NCAPD3	kgCluster5775	602.111	934.567	269.655	0.288535	-1.79318	3.1917e-08	1.04697e-06
SYT17	kgCluster10813	69.8645	29.2138	110.515	3.78297	1.91952	3.24102e-08	1.06155e-06
SIK3	kgCluster5557	1219.73	591.54	1847.92	3.12391	1.64335	3.29129e-08	1.07638e-06
CCDC149	kgCluster21049	274.839	431.172	118.506	0.274847	-1.8633	3.34727e-08	1.09304e-06
C20orf26	kgCluster17741	21.0002	40.6168	1.38358	0.0340642	-4.8756	3.40494e-08	1.1102e-06
FAM65C	kgCluster18118	15.2279	2.83575	27.62	9.73993	3.28391	3.42985e-08	1.11664e-06
PDLIM2	kgCluster27764	256.597	446.778	66.4168	0.148657	-2.74994	3.50561e-08	1.13959e-06
CNP	kgCluster12586	2536.7	1193.18	3880.22	3.25199	1.70132	3.5177e-08	1.1418e-06
NECAB3	kgCluster17863	51.5502	85.4401	17.6603	0.206698	-2.2744	3.53476e-08	1.14562e-06
EMB	kgCluster22157	633.226	976.556	289.896	0.296855	-1.75217	3.69122e-08	1.19454e-06
WDR12	kgCluster17164	197.065	306.21	87.9192	0.287121	-1.80027	3.71568e-08	1.20066e-06
CMTM8	kgCluster19554	14.6577	27.0499	2.2655	0.0837524	-3.57773	3.78052e-08	1.2198e-06
LOC100131096	kgCluster13200	210.148	331.126	89.1695	0.269292	-1.89276	3.83434e-08	1.23532e-06
SLC4A7	kgCluster19537	1080.31	1649.05	511.576	0.310225	-1.68862	3.89903e-08	1.2543e-06
ADPGK	kgCluster9745	243.636	111.873	375.399	3.35559	1.74657	3.90507e-08	1.25437e-06
PRKD2	kgCluster15087	545.103	268.141	822.065	3.0658	1.61626	3.97242e-08	1.27412e-06
USP11	kgCluster30198	938.416	439.354	1437.48	3.2718	1.71008	3.99246e-08	1.27865e-06
RUFY4	kgCluster17259	48.5183	7.45133	89.5852	12.0227	3.58769	4.00115e-08	1.27954e-06
PCYOX1L	kgCluster22834	164.822	274.404	55.239	0.201305	-2.31254	4.00788e-08	1.2798e-06
EEF2K	kgCluster10870	953.753	1446.35	461.151	0.318837	-1.64911	4.08316e-08	1.30192e-06
ARAP2	kgCluster21069	1187.15	565.482	1808.81	3.19871	1.67749	4.13466e-08	1.3164e-06
TRIM32	kgCluster29433	230.337	363.747	96.9257	0.266464	-1.90799	4.15807e-08	1.32191e-06
DTYMK	kgCluster17530	186.104	299.571	72.6367	0.242469	-2.04413	4.20414e-08	1.3346e-06
COTL1	kgCluster11535	1221.77	1856.74	586.792	0.316034	-1.66185	4.23532e-08	1.34253e-06
SNAI3	kgCluster11585	56.6286	94.9088	18.3484	0.193326	-2.37089	4.30655e-08	1.36311e-06
GTPBP2	kgCluster24132	1417.26	682.394	2152.13	3.15379	1.65709	4.35684e-08	1.37702e-06
GADD45B	kgCluster13920	613.279	265.03	961.528	3.62799	1.85917	4.54519e-08	1.43445e-06
ATAD3A	kgCluster70	225.998	348.721	103.274	0.296151	-1.75559	4.62262e-08	1.45676e-06
COL23A1	kgCluster23087	409.446	690.944	127.948	0.185178	-2.43301	4.65648e-08	1.4653e-06
C17orf66	kgCluster12348	16.699	0.496767	32.9012	66.2307	6.04943	4.70696e-08	1.47904e-06
AATK	kgCluster13255	258.634	462.933	54.3348	0.117371	-3.09085	4.72861e-08	1.48369e-06
TRAFD1	kgCluster6934	1352.07	648.851	2055.3	3.1676	1.66339	4.74769e-08	1.48752e-06
FAM60A	kgCluster6173	704.08	318.457	1089.7	3.42182	1.77476	4.8556e-08	1.51913e-06
DTX3L	kgCluster20213	3362.44	1614.2	5110.69	3.16607	1.66269	5.0415e-08	1.57501e-06
HIST1H2BE	kgCluster23369	16.2868	3.33138	29.2422	8.77781	3.13386	5.10609e-08	1.5929e-06
FANCE	kgCluster23993	52.036	84.9869	19.0852	0.224566	-2.15479	5.12915e-08	1.59778e-06
RHBDF2	kgCluster13172	2204.92	1061.25	3348.59	3.15533	1.65779	5.1764e-08	1.61019e-06
SYT6	kgCluster1360	10.5913	20.9068	0.275699	0.0131871	-6.24473	5.19375e-08	1.61327e-06
SOCS2	kgCluster6735	107.347	31.9812	182.713	5.71313	2.51428	5.30067e-08	1.64412e-06
CXCL9	kgCluster21320	1209.46	41.2596	2377.66	57.627	5.84867	5.31142e-08	1.6451e-06
GAS2L3	kgCluster6804	254.82	447.22	62.4195	0.139572	-2.84092	5.48494e-08	1.69641e-06
EIF4EBP1	kgCluster27885	210.662	352.609	68.7153	0.194877	-2.35937	5.50343e-08	1.6997e-06
PLA2G15	kgCluster11364	949.103	1455.16	443.05	0.304469	-1.71563	5.67237e-08	1.74938e-06
KCNK6	kgCluster14805	239.328	369.396	109.259	0.295778	-1.75742	5.731e-08	1.76495e-06
POP5	kgCluster7014	101.266	160.884	41.6476	0.258867	-1.94971	5.77919e-08	1.77726e-06
SOCS2	kgCluster6736	106.668	31.322	182.014	5.81107	2.5388	5.8211e-08	1.78256e-06
BIN1	kgCluster16636	330.975	542.802	119.147	0.219504	-2.18768	5.81401e-08	1.78256e-06
ABL2	kgCluster2188	2886.7	1340.9	4432.51	3.30563	1.72493	5.82009e-08	1.78256e-06
SEMA6B	kgCluster13988	1568.82	2411.9	725.737	0.300898	-1.73265	6.03053e-08	1.84408e-06
KLF2	kgCluster14395	35.8404	64.1416	7.53908	0.117538	-3.0888	6.18197e-08	1.88772e-06
RAB11FIP4	kgCluster12289	89.9483	141.966	37.9304	0.267179	-1.90412	6.20706e-08	1.89272e-06
PCCA	kgCluster7599	167.383	262.174	72.5919	0.276884	-1.85265	6.31978e-08	1.92438e-06
ST3GAL2	kgCluster11406	1428.68	691.45	2165.91	3.13242	1.64728	6.37464e-08	1.93836e-06
PLA1A	kgCluster20176	26.696	1.07753	52.3144	48.5503	5.60141	6.43345e-08	1.9535e-06
CASP3	kgCluster21872	1340.31	647.485	2033.13	3.14004	1.65078	6.48043e-08	1.96501e-06
KLHL28	kgCluster8012	798.916	394.914	1202.92	3.04602	1.60693	6.6086e-08	2.00106e-06
NFKBIE	kgCluster24147	1308.04	628.602	1987.47	3.16174	1.66072	6.7987e-08	2.05575e-06
ABCC2	kgCluster3697	27.8412	8.67749	47.0049	5.41688	2.43746	6.98618e-08	2.10949e-06
LOC731424	kgCluster21877	774.845	126.947	1422.74	11.2073	3.48637	7.12882e-08	2.14957e-06
SLC12A2	kgCluster22587	165.553	257.662	73.4442	0.28504	-1.81076	7.28339e-08	2.1913e-06
WWP1	kgCluster28153	1081.97	1653.86	510.083	0.30842	-1.69703	7.28747e-08	2.1913e-06
FBXW8	kgCluster6972	192.487	296.874	88.0993	0.296757	-1.75265	7.33237e-08	2.20175e-06
STAT2	kgCluster6493	3548.67	1753.82	5343.52	3.04679	1.60729	7.4094e-08	2.2218e-06
PID1	kgCluster17370	307.469	511.201	103.738	0.20293	-2.30095	7.43565e-08	2.22658e-06
AK124173	kgCluster24646	24.0708	5.69634	42.4453	7.45133	2.8975	7.53124e-08	2.25209e-06
JMJD7-PLA2G4B	kgCluster9203	731.142	343.217	1119.07	3.26052	1.7051	7.60606e-08	2.27133e-06
GK	kgCluster21780	111.255	36.5671	185.943	5.08498	2.34624	7.80918e-08	2.32877e-06
LTB4R	kgCluster7915	312.93	555.004	70.8551	0.127666	-2.96956	7.91066e-08	2.35579e-06
FAM151A	kgCluster921	72.5054	130.299	14.7113	0.112904	-3.14683	7.9719e-08	2.36751e-06
CHEK2	kgCluster18918	114.147	178.976	49.3192	0.275564	-1.85954	7.96627e-08	2.36751e-06
PEMT	kgCluster12019	69.0174	111.568	26.4672	0.23723	-2.07564	7.9992e-08	2.37237e-06
UBE2CBP	kgCluster24330	19.7396	35.8184	3.66091	0.102208	-3.29042	8.13157e-08	2.40832e-06
FAM212B	kgCluster1324	198.831	338.105	59.5578	0.176152	-2.50511	8.16213e-08	2.41407e-06
ZMIZ2	kgCluster26453	2675.41	1338.88	4011.95	2.99651	1.58328	8.25603e-08	2.43851e-06
PDGFC	kgCluster21743	384.457	632.084	136.829	0.216473	-2.20774	8.39085e-08	2.47496e-06
DOPEY1	kgCluster24331	1406.3	598.151	2214.46	3.70217	1.88837	8.44034e-08	2.48617e-06
C21orf56	kgCluster18629	33.7988	58.0074	9.59015	0.165326	-2.59661	8.4556e-08	2.48728e-06
CBX2	kgCluster13231	14.3457	27.7874	0.903867	0.0325279	-4.94218	8.51529e-08	2.49805e-06
LGALS3BP	kgCluster13222	1900.21	920.095	2880.33	3.13048	1.64638	8.50699e-08	2.49805e-06
CYB5RL	kgCluster917	99.8835	161.582	38.185	0.23632	-2.08119	8.56796e-08	2.5101e-06
BNC2	kgCluster28648	214.131	418.007	10.2549	0.0245328	-5.34915	8.62762e-08	2.52416e-06
RASGRP4	kgCluster14811	314.596	488.804	140.388	0.287207	-1.79984	8.73706e-08	2.55273e-06
KIAA1462	kgCluster3061	20.8106	1.71299	39.9082	23.2974	4.5421	8.78916e-08	2.56104e-06
AK127555	kgCluster23276	102.987	170.745	35.2298	0.20633	-2.27698	8.77781e-08	2.56104e-06
S100A12	kgCluster1726	18.0175	6.10178	29.9332	4.90564	2.29444	8.89439e-08	2.58822e-06
KAZN	kgCluster266	34.6272	58.3922	10.8622	0.186021	-2.42646	9.19628e-08	2.67248e-06
ATP8B2	kgCluster1765	331.539	93.7139	569.365	6.07556	2.60302	9.22884e-08	2.67834e-06
VASH1	kgCluster8310	1030.06	1531.98	528.134	0.34474	-1.53642	9.45028e-08	2.73894e-06
AIG1	kgCluster24680	157.75	247.077	68.4242	0.276935	-1.85238	9.55253e-08	2.76387e-06
ATP5G1	kgCluster12794	149.783	231.499	68.0677	0.294031	-1.76596	9.56185e-08	2.76387e-06
SRM	kgCluster205	278.813	424.44	133.185	0.31379	-1.67213	9.59255e-08	2.76905e-06
AX721193	kgCluster13389	35.8767	65.6401	6.11326	0.093133	-3.42456	9.61222e-08	2.77103e-06
CCL4L2	kgCluster12371	420.911	110.516	731.306	6.61721	2.72622	9.84278e-08	2.83373e-06
NRSN2	kgCluster17550	55.4218	19.3411	91.5025	4.73099	2.24214	1.01532e-07	2.91921e-06
HIST1H1C	kgCluster23360	112.847	31.0439	194.649	6.27013	2.64849	1.02151e-07	2.93312e-06
UPB1	kgCluster18871	71.9054	0.53129	143.279	269.682	8.07512	1.03393e-07	2.96484e-06
SLC1A2	kgCluster4468	363.077	15.6568	710.496	45.3793	5.50396	1.0494e-07	3.00523e-06
CLCF1	kgCluster5120	92.9735	27.4264	158.521	5.77985	2.53103	1.06379e-07	3.04242e-06
CFLAR-AS1	kgCluster17141	121.603	53.1312	190.074	3.57745	1.83893	1.08534e-07	3.09179e-06
BRI3BP	kgCluster7100	136.389	213.081	59.6977	0.280165	-1.83565	1.08346e-07	3.09179e-06
TBC1D17	kgCluster15253	840.481	428.912	1252.05	2.91913	1.54554	1.08516e-07	3.09179e-06
CCL4L2	kgCluster12385	380.257	102.42	658.093	6.42544	2.6838	1.12208e-07	3.19226e-06
RCC1	kgCluster538	330.569	495.351	165.787	0.334686	-1.57912	1.12871e-07	3.20689e-06
LOC728989	kgCluster1512	84.6855	35.1488	134.222	3.81869	1.93308	1.15266e-07	3.27064e-06
TMEM139	kgCluster27375	13.3388	1.67865	24.999	14.8923	3.8965	1.15454e-07	3.2717e-06
OTUD1	kgCluster3014	736.844	364.053	1109.64	3.04801	1.60787	1.17044e-07	3.31242e-06
FAM113B	kgCluster6229	113.172	211.573	14.7721	0.0698206	-3.8402	1.17405e-07	3.3183e-06
URB2	kgCluster2656	173.889	268.559	79.2197	0.294981	-1.76131	1.1761e-07	3.31976e-06
GFOD1	kgCluster23277	138.872	214.673	63.0709	0.2938	-1.76709	1.23116e-07	3.47066e-06
BTG3	kgCluster18335	472.846	224.484	721.209	3.21274	1.6838	1.24838e-07	3.51463e-06
CDK6	kgCluster26827	686.021	1152.65	219.388	0.190333	-2.3934	1.2707e-07	3.57283e-06
TSEN2	kgCluster19439	44.6934	74.0199	15.3669	0.207605	-2.26808	1.29911e-07	3.64796e-06
NME4	kgCluster10457	298.569	454.448	142.69	0.313985	-1.67123	1.30408e-07	3.65717e-06
FAM190A	kgCluster21425	15.352	29.5774	1.12671	0.0380936	-4.71431	1.30903e-07	3.66631e-06
RHOBTB2	kgCluster27772	366.031	565.753	166.308	0.293959	-1.76631	1.31969e-07	3.69138e-06
EVI2A	kgCluster12288	470.306	757.915	182.696	0.241051	-2.05259	1.39807e-07	3.90557e-06
SLCO3A1	kgCluster10088	990.266	488.852	1491.68	3.0514	1.60947	1.40865e-07	3.93005e-06
ZFHX3	kgCluster11450	947.277	1431.53	463.028	0.32345	-1.62838	1.41108e-07	3.93178e-06
GCNT4	kgCluster22346	87.4462	7.69077	167.202	21.7405	4.44232	1.41312e-07	3.9324e-06
LOC646329	kgCluster27216	38.6393	6.79092	70.4876	10.3797	3.37569	1.41782e-07	3.94041e-06
SMC2	kgCluster29316	635.226	1008.18	262.271	0.260143	-1.94262	1.43814e-07	3.99176e-06
BCL3	kgCluster15009	884.766	433.913	1335.62	3.07808	1.62203	1.4434e-07	4.00123e-06
TRIM25	kgCluster12876	2919.57	1474.36	4364.78	2.96046	1.56582	1.45922e-07	4.03993e-06
TANC2	kgCluster12976	836.805	1368.3	305.312	0.223133	-2.16403	1.46188e-07	4.04211e-06
TMEM201	kgCluster185	132.448	211.26	53.6358	0.253885	-1.97775	1.47913e-07	4.0846e-06
ARHGEF9	kgCluster30371	187.884	289.645	86.1242	0.297344	-1.74979	1.53707e-07	4.23918e-06
TPCN1	kgCluster6948	1630.34	2563.34	697.335	0.272041	-1.8781	1.56647e-07	4.3093e-06
DBF4	kgCluster26798	173.095	267.546	78.6454	0.293952	-1.76635	1.56477e-07	4.3093e-06
LOC100507632	kgCluster27984	44.0941	8.49386	79.6943	9.38258	3.22998	1.6091e-07	4.42094e-06
C2orf65	kgCluster16249	43.1287	79.7352	6.52221	0.0817983	-3.61178	1.64019e-07	4.50064e-06
B3GALTL	kgCluster7276	149.162	230.741	67.5832	0.292896	-1.77154	1.65451e-07	4.5342e-06
MFNG	kgCluster19101	368.799	555.365	182.234	0.328135	-1.60764	1.72854e-07	4.73108e-06
LOC100233209	kgCluster6232	91.7533	156.261	27.2454	0.174358	-2.51988	1.73231e-07	4.73542e-06
NMI	kgCluster16834	751.823	368.978	1134.67	3.07516	1.62066	1.73776e-07	4.74433e-06
SYNPO	kgCluster22857	133.409	8.23531	258.582	31.3992	4.97266	1.75861e-07	4.79521e-06
STAP2	kgCluster13978	57.4954	18.689	96.3019	5.15287	2.36538	1.80004e-07	4.89583e-06
CYBRD1	kgCluster16950	817.012	1337.26	296.763	0.221918	-2.1719	1.79906e-07	4.89583e-06
TMEM48	kgCluster907	361.545	591.258	131.831	0.222967	-2.1651	1.8593e-07	5.05067e-06
RARA	kgCluster12507	343.591	523.342	163.841	0.313067	-1.67546	1.9064e-07	5.17214e-06
CTLA4	kgCluster17172	18.1452	32.4184	3.87192	0.119436	-3.06569	1.91947e-07	5.20108e-06
C11orf51	kgCluster5211	159.739	247.016	72.4616	0.293347	-1.76932	1.92615e-07	5.21263e-06
PRDM1	kgCluster24426	1434.28	692.491	2176.06	3.14237	1.65185	1.94675e-07	5.26182e-06
METAP1D	kgCluster16954	11.7535	22.5017	1.00529	0.0446764	-4.48434	1.9706e-07	5.31965e-06
LOC100505474	kgCluster13702	18.535	0.368856	36.7011	99.4998	6.63662	2.01082e-07	5.42146e-06
DSE	kgCluster24501	2622.11	1312.83	3931.38	2.99457	1.58235	2.02818e-07	5.46147e-06
CKAP2	kgCluster7452	545.825	841.964	249.686	0.296552	-1.75364	2.03716e-07	5.47883e-06
APOL2	kgCluster19026	1098.39	551.012	1645.76	2.9868	1.5786	2.15965e-07	5.80103e-06
SARDH	kgCluster29696	26.7073	51.0995	2.31523	0.0453083	-4.46408	2.17019e-07	5.82213e-06
HMGN2P46	kgCluster9286	231.432	87.9384	374.926	4.26351	2.09204	2.17291e-07	5.82223e-06
STX10	kgCluster14276	267.814	408.218	127.41	0.312112	-1.67986	2.17823e-07	5.82926e-06
PDE3B	kgCluster4339	254.136	462.822	45.4511	0.0982043	-3.34807	2.22758e-07	5.94661e-06
MYPOP	kgCluster15062	169.966	77.322	262.609	3.3963	1.76397	2.22512e-07	5.94661e-06
CPEB2	kgCluster21008	1195.57	594.115	1797.03	3.02471	1.5968	2.23863e-07	5.96877e-06
CEP128	kgCluster8344	138.503	214.707	62.2995	0.29016	-1.78508	2.24322e-07	5.97365e-06
NLRP1	kgCluster11795	156.033	283.143	28.9232	0.102151	-3.29123	2.28165e-07	6.06853e-06
AK026379	kgCluster21419	342.734	524.811	160.657	0.306123	-1.70782	2.35572e-07	6.25783e-06
POLA1	kgCluster30090	302.921	517.206	88.6372	0.171377	-2.54475	2.37445e-07	6.29985e-06
CXCL13	kgCluster21337	789.842	17.7439	1561.94	88.0267	6.45987	2.38368e-07	6.30889e-06
BC014180	kgCluster28858	73.324	118.34	28.308	0.239209	-2.06366	2.38244e-07	6.30889e-06
NCAPD2	kgCluster5884	968.164	1441.27	495.06	0.34349	-1.54166	2.39922e-07	6.34225e-06
CCL3	kgCluster12359	780.639	385.302	1175.98	3.05209	1.6098	2.45101e-07	6.47127e-06
CMBL	kgCluster22006	166.848	261.481	72.2158	0.27618	-1.85632	2.46453e-07	6.49904e-06
HAGHL	kgCluster10485	67.6168	121.159	14.0742	0.116162	-3.10579	2.52523e-07	6.65101e-06
BTN3A3	kgCluster23404	767.219	395.743	1138.69	2.87736	1.52475	2.54964e-07	6.70714e-06
HMGB3	kgCluster30930	263.12	418.97	107.271	0.256035	-1.96559	2.62159e-07	6.88804e-06
HIST1H2AD	kgCluster23372	23.7212	2.13342	45.3089	21.2377	4.40856	2.68636e-07	7.04966e-06
SFXN2	kgCluster3763	69.9618	124.359	15.5645	0.125158	-2.99818	2.70529e-07	7.09075e-06
ADCY3	kgCluster15797	1041.5	1559.85	523.14	0.335377	-1.57614	2.73118e-07	7.14996e-06
NFKBIA	kgCluster7977	1678.03	846.153	2509.91	2.96625	1.56864	2.82589e-07	7.38894e-06
PNPLA7	kgCluster29819	71.1584	127.866	14.4511	0.113018	-3.14538	2.83763e-07	7.4107e-06
ZNF530	kgCluster15600	51.414	84.1474	18.6805	0.221998	-2.17138	2.84207e-07	7.41335e-06
ETV3L	kgCluster1870	134.094	20.6115	247.577	12.0116	3.58636	2.88586e-07	7.5185e-06
EARS2	kgCluster10900	280.377	424.006	136.748	0.322514	-1.63257	2.90579e-07	7.55226e-06
ARHGAP4	kgCluster30988	1260.33	1885.41	635.238	0.336923	-1.56951	2.90441e-07	7.55226e-06
MYB	kgCluster24626	17.6241	34.7465	0.501666	0.0144379	-6.114	2.91641e-07	7.57077e-06
PTGFRN	kgCluster1389	623.827	1082.14	165.509	0.152946	-2.70891	2.99716e-07	7.76178e-06
UGCG	kgCluster29380	732.157	365.993	1098.32	3.00093	1.58541	2.99435e-07	7.76178e-06
GLIPR1	kgCluster6659	1329.48	2039.31	619.639	0.303847	-1.71858	3.01616e-07	7.80164e-06
XYLB	kgCluster19594	89.2964	170.05	8.54322	0.0502396	-4.31503	3.11184e-07	8.02995e-06
2019-03-09	kgCluster6550	460.356	230.199	690.513	2.99963	1.58478	3.10901e-07	8.02995e-06
WARS	kgCluster8524	2800.49	1463.04	4137.94	2.82832	1.49994	3.11969e-07	8.04063e-06
LOC90784	kgCluster16305	202.495	306.235	98.7536	0.322476	-1.63274	3.18408e-07	8.19683e-06
FBP1	kgCluster29226	595.581	989.959	201.203	0.203244	-2.29872	3.21968e-07	8.27864e-06
RRP12	kgCluster3659	349.915	537.49	162.341	0.302036	-1.72721	3.23993e-07	8.31097e-06
BX538254	kgCluster17015	221.116	106.149	336.083	3.16615	1.66273	3.23929e-07	8.31097e-06
GGT5	kgCluster18863	53.2123	4.12742	102.297	24.7848	4.63138	3.2869e-07	8.42146e-06
SSBP4	kgCluster14459	274.911	414.292	135.53	0.327136	-1.61204	3.30367e-07	8.45443e-06
SIX5	kgCluster15054	45.9862	11.8255	80.1469	6.77748	2.76075	3.3338e-07	8.52145e-06
GUCY1A3	kgCluster21738	47.6271	5.92564	89.3286	15.0749	3.91408	3.46309e-07	8.84151e-06
RNF125	kgCluster13578	300.916	496.409	105.423	0.212371	-2.23534	3.54873e-07	9.04947e-06
IL1RN	kgCluster16575	2088.58	1099.92	3077.24	2.79769	1.48424	3.61158e-07	9.19892e-06
ALOX15	kgCluster11745	52.1089	28.7576	75.4603	2.62401	1.39177	3.62241e-07	9.21566e-06
IPW	kgCluster8842	87.5548	140.569	34.5403	0.245717	-2.02493	3.63367e-07	9.23344e-06
SEMA4D	kgCluster29159	1263.74	655.287	1872.19	2.85706	1.51453	3.66517e-07	9.30258e-06
PFKFB3	kgCluster2888	5001.11	2534.96	7467.27	2.94572	1.55862	3.71616e-07	9.42095e-06
CMYA5	kgCluster22384	33.0193	9.86685	56.1718	5.69298	2.50918	3.75052e-07	9.49693e-06
ERCC8	kgCluster22216	96.8777	152.719	41.0363	0.268705	-1.89591	3.7758e-07	9.54977e-06
MAN1C1	kgCluster465	276.93	424.865	128.995	0.303614	-1.71969	3.78975e-07	9.57388e-06
LRP12	kgCluster28276	1128.76	540.691	1716.83	3.17524	1.66687	3.84238e-07	9.69551e-06
DUT	kgCluster9295	279.757	416.66	142.854	0.342855	-1.54433	3.90357e-07	9.83845e-06
HEATR3	kgCluster11172	496.591	736.968	256.214	0.34766	-1.52425	3.97575e-07	1.00087e-05
GLCE	kgCluster9700	340.614	512.181	169.046	0.330052	-1.59924	4.01329e-07	1.00915e-05
ADAM12	kgCluster3951	27.1261	45.8234	8.42879	0.183941	-2.44269	4.03798e-07	1.01418e-05
MCOLN1	kgCluster14068	900.627	1359.22	442.032	0.32521	-1.62056	4.07093e-07	1.02127e-05
LRRC1	kgCluster24228	44.8342	14.8255	74.8429	5.04824	2.33578	4.12735e-07	1.03423e-05
HEATR2	kgCluster26091	223.846	333.549	114.144	0.342209	-1.54705	4.16893e-07	1.04344e-05
CD3EAP	kgCluster15034	170.466	257.614	83.3179	0.323421	-1.62851	4.18977e-07	1.04744e-05
HLA-F	kgCluster23645	1409.27	729.196	2089.35	2.86528	1.51867	4.21043e-07	1.05139e-05
SPATC1	kgCluster28511	235.659	20.386	450.931	22.1197	4.46726	4.42967e-07	1.10232e-05
WDR90	kgCluster10474	127.482	199.489	55.4755	0.278087	-1.84639	4.4291e-07	1.10232e-05
LDLR	kgCluster14193	879.779	433.745	1325.81	3.05666	1.61196	4.42606e-07	1.10232e-05
TMCC2	kgCluster2413	144.605	27.1213	262.088	9.66355	3.27255	4.44957e-07	1.10601e-05
TTLL12	kgCluster19243	450.874	676.138	225.611	0.333676	-1.58348	4.5071e-07	1.11902e-05
SLC2A8	kgCluster29532	325.348	497.656	153.041	0.307523	-1.70123	4.61185e-07	1.14372e-05
TLR8	kgCluster30000	1624.56	774.083	2475.03	3.19737	1.67688	4.68505e-07	1.16054e-05
PHF17	kgCluster21611	293.819	439.203	148.435	0.337964	-1.56506	4.73318e-07	1.17112e-05
CENPO	kgCluster15796	519.659	780.098	259.219	0.332291	-1.58948	4.77692e-07	1.1806e-05
HMBS	kgCluster5610	117.056	179.767	54.3456	0.302312	-1.72589	4.81283e-07	1.18812e-05
MDK	kgCluster4647	217.078	14.0407	420.116	29.9212	4.9031	4.84029e-07	1.19353e-05
CHST12	kgCluster26122	362.235	163.496	560.974	3.43111	1.77868	4.8478e-07	1.19403e-05
BC114339	kgCluster12877	476.068	242.549	709.587	2.92555	1.54871	4.89363e-07	1.20395e-05
LOC100289511	kgCluster8219	168.315	79.285	257.346	3.24583	1.69859	4.9102e-07	1.20665e-05
ERP27	kgCluster6082	15.6892	27.7456	3.63283	0.130934	-2.93309	4.94777e-07	1.2145e-05
TMEM117	kgCluster6213	74.1325	118.616	29.6492	0.24996	-2.00023	4.99729e-07	1.22527e-05
ADORA3	kgCluster1319	738.957	1395.2	82.7164	0.0592865	-4.07615	5.01786e-07	1.22892e-05
TRPM4	kgCluster15206	682.412	355.443	1009.38	2.83978	1.50578	5.06437e-07	1.23891e-05
FSTL1	kgCluster20187	103.871	3.4152	204.327	59.8287	5.90276	5.1417e-07	1.25641e-05
LOC100507463	kgCluster23801	576.8	293.353	860.247	2.93247	1.55212	5.18546e-07	1.26567e-05
SOWAHD	kgCluster30703	107.196	168.378	46.0135	0.273275	-1.87157	5.19532e-07	1.26665e-05
DENND1B	kgCluster2307	1304.31	569.131	2039.5	3.58353	1.84138	5.25214e-07	1.27906e-05
TOX2	kgCluster17998	23.7496	47.0472	0.451933	0.00960595	-6.70186	5.26127e-07	1.27985e-05
CASP7	kgCluster3835	797.666	409.422	1185.91	2.89655	1.53433	5.38346e-07	1.3081e-05
PPARG	kgCluster19438	148.033	272.089	23.9779	0.0881251	-3.5043	5.40315e-07	1.31142e-05
RFC5	kgCluster6977	161.297	253.373	69.2217	0.273201	-1.87197	5.47235e-07	1.32672e-05
CYTIP	kgCluster16862	784.935	419.966	1149.9	2.73809	1.45317	5.50094e-07	1.33216e-05
KIAA1211	kgCluster21201	170.273	38.2061	302.34	7.9134	2.9843	5.53675e-07	1.33934e-05
RFC4	kgCluster20707	154.314	238.517	70.112	0.29395	-1.76636	5.59231e-07	1.35127e-05
PDCD1LG2	kgCluster28608	790.531	389.769	1191.29	3.0564	1.61183	5.64087e-07	1.36148e-05
ERN1	kgCluster13002	550.476	285.971	814.981	2.84988	1.5109	5.6576e-07	1.364e-05
EHF	kgCluster4463	33.7934	12.3809	55.2058	4.45894	2.1567	5.69363e-07	1.37116e-05
MLLT6	kgCluster12447	3738.32	1958.21	5518.43	2.8181	1.49472	5.71887e-07	1.37418e-05
FOXN2	kgCluster16028	1713.15	905.816	2520.48	2.78255	1.47641	5.71614e-07	1.37418e-05
DCAF4	kgCluster8243	82.7284	130.508	34.949	0.267793	-1.90081	5.73795e-07	1.37724e-05
RIMBP3	kgCluster18748	27.3016	46.7108	7.8923	0.168961	-2.56524	5.82092e-07	1.3956e-05
CLN6	kgCluster9689	756.461	1127.09	385.836	0.342331	-1.54654	5.92639e-07	1.41743e-05
C7orf60	kgCluster27080	564.628	289.159	840.097	2.90531	1.53869	5.93159e-07	1.41743e-05
HS2ST1	kgCluster1113	833.401	1215.88	450.923	0.370862	-1.43105	5.92644e-07	1.41743e-05
GPD2	kgCluster16858	2743.7	1412.07	4075.32	2.88606	1.5291	6.07622e-07	1.45039e-05
CXCL10	kgCluster21322	1013.63	160.773	1866.48	11.6094	3.53722	6.13511e-07	1.46283e-05
FARSB	kgCluster17337	251.602	398.583	104.621	0.262483	-1.9297	6.29424e-07	1.49912e-05
ODF3B	kgCluster19340	253.516	128.119	378.913	2.9575	1.56438	6.33508e-07	1.50719e-05
NR6A1	kgCluster29503	51.0142	19.1777	82.8507	4.32016	2.11108	6.52287e-07	1.55017e-05
KIF21B	kgCluster2329	367.088	611.291	122.886	0.201027	-2.31454	6.55784e-07	1.55677e-05
ERMP1	kgCluster28610	801.014	1197.16	404.869	0.338191	-1.56409	6.65808e-07	1.57883e-05
CEBPE	kgCluster7864	35.5684	62.4412	8.6956	0.139261	-2.84414	6.68825e-07	1.58425e-05
SCFD2	kgCluster21174	149.772	246.253	53.2904	0.216405	-2.20819	6.70505e-07	1.5865e-05
GEMIN4	kgCluster11651	228.488	336.843	120.134	0.356646	-1.48743	6.86414e-07	1.62236e-05
CD1A	kgCluster1885	22.5964	39.788	5.4047	0.135837	-2.88005	6.96337e-07	1.64402e-05
CHST7	kgCluster30187	517.68	272.893	762.468	2.79402	1.48234	7.04867e-07	1.66235e-05
ZNF485	kgCluster3119	17.0154	30.1848	3.8461	0.127419	-2.97235	7.10406e-07	1.67177e-05
TMEM132A	kgCluster4862	280.477	64.3236	496.631	7.72082	2.94875	7.10337e-07	1.67177e-05
TRAF3IP2	kgCluster24478	533.125	142.966	923.284	6.45807	2.6911	7.19805e-07	1.69205e-05
BTN2A1	kgCluster23405	1007.85	524.088	1491.61	2.8461	1.50899	7.37648e-07	1.73211e-05
GOLIM4	kgCluster20560	582.593	867.543	297.643	0.343088	-1.54335	7.51214e-07	1.76206e-05
PGBD5	kgCluster2658	131.854	254.189	9.51981	0.0374517	-4.73882	7.58175e-07	1.77646e-05
RELA	kgCluster5052	1668.15	875.607	2460.69	2.81027	1.49071	7.67671e-07	1.79676e-05
USP31	kgCluster10893	215.892	322.235	109.549	0.339965	-1.55654	7.85671e-07	1.83691e-05
FAM173B	kgCluster22004	109.214	166.264	52.1638	0.31374	-1.67236	7.88017e-07	1.84041e-05
EHBP1	kgCluster16105	340.161	170.584	509.738	2.98819	1.57927	7.95578e-07	1.85606e-05
ZNF277	kgCluster27076	436.609	231.259	641.958	2.77593	1.47297	8.01968e-07	1.86896e-05
TCTEX1D4	kgCluster800	21.9562	6.62969	37.2826	5.62358	2.49149	8.12734e-07	1.89201e-05
MST4	kgCluster30774	524.713	268.668	780.757	2.90602	1.53905	8.30557e-07	1.93142e-05
KIAA1199	kgCluster9899	1026.68	112.192	1941.16	17.3022	4.11288	8.32086e-07	1.9329e-05
PDE4DIP	kgCluster1466	5825.91	3112.68	8539.14	2.74334	1.45593	8.70983e-07	2.02109e-05
BLM	kgCluster10075	138.64	249.499	27.7803	0.111344	-3.1669	8.91215e-07	2.06583e-05
OBFC2A	kgCluster17087	2819.24	1471.21	4167.27	2.83255	1.5021	8.96025e-07	2.07475e-05
SBNO2	kgCluster13861	1908.07	977.371	2838.76	2.90449	1.53828	9.07995e-07	2.10022e-05
SRD5A3	kgCluster21187	323.843	481.266	166.419	0.345794	-1.53201	9.09392e-07	2.10121e-05
LAPTM4B	kgCluster28218	39.1746	67.9185	10.4307	0.153577	-2.70296	9.27163e-07	2.13999e-05
TRIM56	kgCluster26964	802.7	428.89	1176.51	2.74315	1.45583	9.32477e-07	2.14996e-05
ZNF503-AS2	kgCluster3402	32.1997	55.963	8.4364	0.15075	-2.72977	9.38167e-07	2.16078e-05
JRK	kgCluster28457	386.547	570.789	202.304	0.354429	-1.49643	9.44355e-07	2.17272e-05
BAG2	kgCluster24246	45.6753	74.2733	17.0772	0.229924	-2.12077	9.47532e-07	2.17771e-05
BATF2	kgCluster5007	633.453	71.779	1195.13	16.6501	4.05746	9.6657e-07	2.21911e-05
FAM126B	kgCluster17136	1005.73	537.296	1474.15	2.74365	1.4561	9.72429e-07	2.2302e-05
PAQR4	kgCluster10604	398.266	627.913	168.619	0.268539	-1.89679	9.74629e-07	2.23288e-05
GMPR	kgCluster23291	597.042	110.721	1083.36	9.78464	3.29052	9.90019e-07	2.26434e-05
HSD17B8	kgCluster23817	44.7392	72.9335	16.5449	0.226848	-2.1402	9.90451e-07	2.26434e-05
DGKD	kgCluster17434	306.47	468.986	143.954	0.306948	-1.70394	9.95267e-07	2.27295e-05
BDH1	kgCluster20814	105.645	161.217	50.0733	0.310596	-1.68689	9.98891e-07	2.27882e-05
GPC1	kgCluster17499	32.2869	58.0268	6.54698	0.112827	-3.14782	1.0041e-06	2.2883e-05
ABCG2	kgCluster21405	75.4618	140.912	10.0114	0.0710473	-3.81508	1.01017e-06	2.29728e-05
PPARGC1B	kgCluster22841	590.765	891.743	289.787	0.324967	-1.62163	1.01007e-06	2.29728e-05
LYSMD2	kgCluster9412	252.867	127.831	377.903	2.95627	1.56378	1.01647e-06	2.30919e-05
NR1H3	kgCluster4668	2024.14	1097.74	2950.54	2.68784	1.42645	1.02154e-06	2.31828e-05
mir-29b-2	kgCluster2463	82.4505	33.4713	131.43	3.92663	1.97329	1.02356e-06	2.32042e-05
ZNF703	kgCluster27874	167.389	286.402	48.377	0.168913	-2.56565	1.02873e-06	2.3297e-05
ADC	kgCluster613	56.8842	6.6703	107.098	16.056	4.00504	1.0423e-06	2.35798e-05
RBP7	kgCluster193	29.8383	57.409	2.26746	0.0394966	-4.66213	1.05379e-06	2.38148e-05
AHCY	kgCluster17874	943.999	1387.34	500.656	0.360874	-1.47043	1.05786e-06	2.38817e-05
AJ606331	kgCluster24621	3.69185	7.38369	0	0	#NAME?	1.06761e-06	2.40769e-05
IDO2	kgCluster27909	46.6843	2.69713	90.6714	33.6177	5.07115	1.08328e-06	2.44047e-05
NDP	kgCluster30171	18.4974	0.169908	36.825	216.734	7.75978	1.09989e-06	2.47373e-05
LINC00189	kgCluster18378	19.9769	2.3182	37.6356	16.2348	4.02102	1.10165e-06	2.47373e-05
PXMP2	kgCluster7151	49.1947	88.4424	9.94698	0.112468	-3.15241	1.10205e-06	2.47373e-05
UBE2L6	kgCluster4771	1104.79	575.239	1634.34	2.84115	1.50647	1.10261e-06	2.47373e-05
HIST1H3H	kgCluster23533	31.1284	5.51879	56.7379	10.2809	3.36189	1.1106e-06	2.48908e-05
AK4	kgCluster992	879.713	297.126	1462.3	4.92147	2.29909	1.13024e-06	2.53048e-05
GRASP	kgCluster6339	43.4418	14.4171	72.4665	5.02642	2.32953	1.14159e-06	2.55062e-05
ERO1LB	kgCluster2712	494.558	260.268	728.848	2.80037	1.48562	1.14061e-06	2.55062e-05
HAUS7	kgCluster30972	114.958	175.915	54.0007	0.30697	-1.70383	1.14566e-06	2.55706e-05
WDR86	kgCluster27507	3.52797	0	7.05594	Inf	Inf	1.16016e-06	2.58675e-05
MASTL	kgCluster3038	824.014	367.262	1280.77	3.48734	1.80213	1.17533e-06	2.61788e-05
PHF11	kgCluster7412	687.983	357.209	1018.76	2.85199	1.51197	1.18203e-06	2.63011e-05
LDLR	kgCluster14192	1728.73	834.915	2622.54	3.14109	1.65126	1.20718e-06	2.6833e-05
CHAF1A	kgCluster13981	306.637	490.895	122.378	0.249296	-2.00407	1.21006e-06	2.68419e-05
ELMO2	kgCluster18074	1864.72	968.801	2760.64	2.84954	1.51073	1.20952e-06	2.68419e-05
CCDC18	kgCluster1163	160.649	242.826	78.4722	0.323162	-1.62967	1.21915e-06	2.7016e-05
RAPH1	kgCluster17170	1074.55	1619.84	529.261	0.326737	-1.6138	1.22231e-06	2.70582e-05
BATF2	kgCluster5008	606.531	65.9259	1147.14	17.4004	4.12105	1.22832e-06	2.7142e-05
SMURF1	kgCluster26880	807.689	427.574	1187.8	2.77801	1.47405	1.2286e-06	2.7142e-05
OR56B1	kgCluster4193	115.66	52.757	178.563	3.38463	1.759	1.25707e-06	2.77426e-05
TTLL12	kgCluster19242	235.276	352.254	118.299	0.335833	-1.57418	1.26711e-06	2.79358e-05
ARRDC3	kgCluster22438	2000.3	1064.01	2936.59	2.75994	1.46464	1.29014e-06	2.84145e-05
BCL9L	kgCluster5599	1154.45	574.22	1734.69	3.02094	1.595	1.2973e-06	2.85433e-05
AIFM2	kgCluster3312	888.248	431.62	1344.88	3.11588	1.63964	1.31083e-06	2.88115e-05
MCM2	kgCluster20266	473.743	874.893	72.5937	0.0829744	-3.59119	1.31937e-06	2.897e-05
BCL2L14	kgCluster6044	124.039	5.44691	242.631	44.5446	5.47718	1.32344e-06	2.90299e-05
ZFP36L2	kgCluster15979	1180.03	1812.71	547.341	0.301946	-1.72764	1.32906e-06	2.91236e-05
RCN3	kgCluster15230	178.285	306.34	50.2306	0.16397	-2.6085	1.33293e-06	2.91495e-05
BC048192	kgCluster19344	70.3067	31.3652	109.248	3.4831	1.80037	1.33174e-06	2.91495e-05
SMCHD1	kgCluster13381	2431.1	1336.82	3525.38	2.63713	1.39897	1.34634e-06	2.9413e-05
CUL1	kgCluster27425	1557.98	809.923	2306.04	2.84723	1.50956	1.35439e-06	2.95591e-05
CBLN3	kgCluster7920	177.051	60.8487	293.253	4.81938	2.26885	1.36279e-06	2.97123e-05
NFKB1	kgCluster21471	2046.26	1096.53	2995.98	2.73223	1.45008	1.38679e-06	3.02051e-05
MTAP	kgCluster28694	415.383	614.73	216.036	0.351432	-1.50868	1.3958e-06	3.03709e-05
CSRNP2	kgCluster6323	570.544	307.046	834.043	2.71635	1.44167	1.39803e-06	3.0389e-05
NTN1	kgCluster11935	160.357	3.82309	316.89	82.8884	6.3731	1.39951e-06	3.03905e-05
SPECC1L	kgCluster18867	1913.58	1026.55	2800.61	2.72818	1.44794	1.44583e-06	3.13649e-05
REEP6	kgCluster13881	20.0993	35.7434	4.45514	0.124642	-3.00413	1.4495e-06	3.13759e-05
USP6NL	kgCluster2914	684.093	363.991	1004.2	2.75885	1.46407	1.45068e-06	3.13759e-05
SIPA1L1	kgCluster8238	1118.01	651.495	1584.53	2.43215	1.28223	1.44953e-06	3.13759e-05
HESX1	kgCluster19901	257.267	14.2804	500.254	35.0308	5.13055	1.45991e-06	3.15441e-05
LILRB1	kgCluster15493	2136.65	1128.96	3144.33	2.78515	1.47776	1.48573e-06	3.20699e-05
ERCC2	kgCluster15032	223.431	332.192	114.67	0.345191	-1.53453	1.49406e-06	3.22174e-05
CDR2	kgCluster10873	271.726	390.086	153.365	0.393158	-1.34682	1.53073e-06	3.29755e-05
AK311380	kgCluster14424	265.006	137.667	392.345	2.84994	1.51093	1.5328e-06	3.29871e-05
GOLGA4	kgCluster19579	2880.47	1544.89	4216.05	2.72902	1.44838	1.57553e-06	3.38731e-05
SH3PXD2B	kgCluster23002	2393.03	937.988	3848.07	4.10248	2.03649	1.59452e-06	3.42474e-05
SAMD1	kgCluster14299	148.933	220.256	77.6093	0.35236	-1.50488	1.59714e-06	3.42695e-05
FBXO16	kgCluster27827	6.57586	12.7715	0.38025	0.0297734	-5.06983	1.60269e-06	3.42869e-05
C12orf34	kgCluster6891	21.8284	38.9502	4.70668	0.120839	-3.04885	1.60231e-06	3.42869e-05
SLC7A11	kgCluster21627	1938	978.117	2897.89	2.96272	1.56692	1.60139e-06	3.42869e-05
ACOT9	kgCluster30077	1080.43	588.537	1572.32	2.67158	1.41769	1.62282e-06	3.46832e-05
AMDHD2	kgCluster10577	527.492	780.613	274.37	0.35148	-1.50848	1.62522e-06	3.47003e-05
ZNF844	kgCluster14229	277.043	147.46	406.627	2.75754	1.46338	1.62752e-06	3.47151e-05
CD22	kgCluster14696	355.376	650.323	60.429	0.0929215	-3.42784	1.63424e-06	3.4824e-05
ILDR1	kgCluster20203	9.48926	1.29684	17.6817	13.6345	3.76919	1.64183e-06	3.49515e-05
AK022915	kgCluster2982	351.806	182.48	521.131	2.85583	1.51391	1.66826e-06	3.54791e-05
TEX2	kgCluster13005	817.64	1196.96	438.321	0.366195	-1.44932	1.67557e-06	3.55997e-05
ALDH5A1	kgCluster23331	89.1024	138.438	39.7665	0.287251	-1.79962	1.68124e-06	3.56851e-05
MYBL1	kgCluster28042	51.3766	96.3733	6.38	0.066201	-3.917	1.70368e-06	3.60906e-05
IRAK2	kgCluster19419	681.203	186.219	1176.19	6.31615	2.65905	1.70241e-06	3.60906e-05
STAT1	kgCluster17084	4535.07	2434.35	6635.78	2.7259	1.44673	1.72135e-06	3.64294e-05
JAZF1	kgCluster26301	252.719	372.677	132.761	0.356236	-1.48909	1.73145e-06	3.66074e-05
UBE2Z	kgCluster12795	2070.59	1123.37	3017.81	2.68639	1.42567	1.75897e-06	3.71529e-05
ITPRIPL1	kgCluster16398	12.4708	21.0238	3.91779	0.18635	-2.42391	1.76342e-06	3.72105e-05
NUDT1	kgCluster26119	124.439	189.368	59.5106	0.31426	-1.66997	1.7838e-06	3.75681e-05
BCL6	kgCluster20718	1329.16	691.503	1966.82	2.84427	1.50806	1.78384e-06	3.75681e-05
CIDEB	kgCluster7913	470.032	753.6	186.464	0.247431	-2.0149	1.8115e-06	3.81137e-05
SIAH2	kgCluster20464	483.153	249.209	717.096	2.87748	1.52481	1.87831e-06	3.9481e-05
LOC100128191	kgCluster6781	154.215	232.712	75.7183	0.325373	-1.61983	1.90175e-06	3.98963e-05
NAB2	kgCluster6516	282.188	418.706	145.671	0.347907	-1.52322	1.90062e-06	3.98963e-05
C9orf91	kgCluster29421	1466.84	675.815	2257.87	3.34096	1.74026	1.90681e-06	3.99637e-05
AKAP1	kgCluster12881	326.471	482.01	170.933	0.354626	-1.49563	1.924e-06	4.02849e-05
ASRGL1	kgCluster4906	248.699	463.654	33.7439	0.0727782	-3.78035	1.93119e-06	4.03963e-05
GLT1D1	kgCluster7116	97.3451	34.283	160.407	4.67891	2.22617	1.93611e-06	4.04213e-05
SERINC5	kgCluster22388	1231.13	1778.68	683.582	0.384321	-1.37962	1.93432e-06	4.04213e-05
DQ572107	kgCluster13001	383.3	205.906	560.695	2.72306	1.44523	1.94075e-06	4.04791e-05
PAFAH1B3	kgCluster14937	53.3079	83.5782	23.0376	0.275641	-1.85914	1.96748e-06	4.09971e-05
ECE2	kgCluster20668	47.0861	75.6929	18.4793	0.244135	-2.03425	1.97257e-06	4.10637e-05
SPTBN1	kgCluster16044	374.344	658.964	89.7248	0.13616	-2.87662	1.99184e-06	4.1425e-05
CCRL2	kgCluster19690	731.138	384.083	1078.19	2.80719	1.48913	1.99821e-06	4.15174e-05
FBXW9	kgCluster14251	39.7882	65.9527	13.6237	0.206568	-2.27531	2.05234e-06	4.26013e-05
TRAPPC2L	kgCluster11597	24.691	41.0653	8.3167	0.202524	-2.30384	2.09786e-06	4.34575e-05
C3orf78	kgCluster19859	83.4024	128.929	37.8754	0.293769	-1.76725	2.09961e-06	4.34575e-05
AF086132	kgCluster11173	74.5487	114.478	34.6197	0.302414	-1.7254	2.09635e-06	4.34575e-05
HELB	kgCluster6601	199.805	67.5509	332.06	4.9157	2.2974	2.12188e-06	4.38765e-05
TCF4	kgCluster13697	1484.59	832.603	2136.57	2.56613	1.3596	2.12508e-06	4.39007e-05
SLC16A1	kgCluster1343	634.27	943.656	324.884	0.344282	-1.53834	2.12958e-06	4.39519e-05
SCMH1	kgCluster735	139.879	207.974	71.783	0.345154	-1.53469	2.14518e-06	4.42316e-05
LOC643988	kgCluster74	105.81	164.397	47.224	0.287256	-1.79959	2.15098e-06	4.42694e-05
SLC25A40	kgCluster26797	438.059	639.555	236.562	0.369886	-1.43485	2.1511e-06	4.42694e-05
CCDC115	kgCluster16698	851.213	452.352	1250.08	2.7635	1.4665	2.18007e-06	4.4823e-05
PAPD7	kgCluster21986	981.716	467.289	1496.14	3.20175	1.67886	2.20686e-06	4.53306e-05
PALM2-AKAP2	kgCluster29360	2093.77	1016.21	3171.33	3.12075	1.64189	2.2728e-06	4.6641e-05
ODF2L	kgCluster1106	562.2	306.534	817.865	2.66811	1.41582	2.27536e-06	4.66493e-05
NDUFAF4	kgCluster24394	93.164	143.616	42.7125	0.297409	-1.74948	2.31379e-06	4.73923e-05
CLYBL	kgCluster7595	54.718	86.5165	22.9195	0.264914	-1.9164	2.33654e-06	4.7813e-05
CBX4	kgCluster13233	581.021	307.88	854.162	2.77433	1.47214	2.34009e-06	4.78403e-05
PTGS2	kgCluster2277	1251.91	207.7	2296.11	11.0549	3.46662	2.34366e-06	4.78682e-05
NTHL1	kgCluster10550	22.314	38.3662	6.26171	0.163209	-2.61521	2.35126e-06	4.78723e-05
PRR11	kgCluster12916	649.352	946.521	352.184	0.372083	-1.42631	2.35271e-06	4.78723e-05
SLC31A2	kgCluster29397	1388.69	755.066	2022.32	2.67833	1.42133	2.34771e-06	4.78723e-05
SYK	kgCluster29172	2179.59	3170.63	1188.55	0.374861	-1.41557	2.35102e-06	4.78723e-05
BC043511	kgCluster6149	22.2633	6.64475	37.8819	5.70102	2.51122	2.3559e-06	4.78921e-05
SYNE1	kgCluster24748	1565.05	2796.69	333.409	0.119215	-3.06836	2.38742e-06	4.84551e-05
RABGAP1L	kgCluster2161	1289.7	681.385	1898.01	2.78552	1.47795	2.38806e-06	4.84551e-05
RNF175	kgCluster21724	66.9807	30.0171	103.944	3.46283	1.79195	2.40231e-06	4.86985e-05
B4GALT2	kgCluster783	73.2106	113.697	32.7244	0.287822	-1.79675	2.41196e-06	4.88027e-05
PANX1	kgCluster5390	906.597	465.708	1347.49	2.89341	1.53277	2.4099e-06	4.88027e-05
PDCD11	kgCluster3776	646.811	941.059	352.564	0.374646	-1.4164	2.43385e-06	4.91997e-05
ARHGAP23	kgCluster12443	123.163	23.0158	223.31	9.70243	3.27835	2.4464e-06	4.94073e-05
MCAT	kgCluster19239	66.4943	102.783	30.2057	0.293878	-1.76671	2.51136e-06	5.06719e-05
DNAJB4	kgCluster1063	284.217	145.342	423.092	2.91102	1.54152	2.53362e-06	5.10734e-05
CEP85	kgCluster482	295.987	436.464	155.509	0.356293	-1.48886	2.53906e-06	5.11355e-05
RBL1	kgCluster17931	318.514	470.155	166.873	0.354932	-1.49438	2.57821e-06	5.18614e-05
RSAD1	kgCluster12837	275.675	401.122	150.228	0.374519	-1.41689	2.5799e-06	5.18614e-05
TMEM63B	kgCluster24142	915.767	483.889	1347.64	2.78503	1.47769	2.63785e-06	5.29282e-05
APBB1IP	kgCluster3030	746.562	1079.26	413.866	0.383472	-1.38281	2.63706e-06	5.29282e-05
SSX2IP	kgCluster1092	123.683	190.464	56.9025	0.298758	-1.74295	2.64583e-06	5.30392e-05
FOS	kgCluster8297	333.583	508.376	158.79	0.312347	-1.67878	2.65272e-06	5.31279e-05
MGC16275	kgCluster13082	69.7123	33.4433	105.981	3.16899	1.66402	2.70695e-06	5.41641e-05
KIF9	kgCluster19710	20.549	35.7112	5.38679	0.150843	-2.72888	2.71312e-06	5.42373e-05
ARL5B	kgCluster2981	502.89	226.279	779.5	3.44486	1.78445	2.72812e-06	5.44869e-05
GAS6	kgCluster7671	424.651	622.681	226.622	0.363945	-1.45821	2.77181e-06	5.53084e-05
NKG7	kgCluster15331	164.092	17.0438	311.141	18.2553	4.19025	2.79413e-06	5.57025e-05
ITGA1	kgCluster22162	154.54	13.6243	295.456	21.686	4.43869	2.81284e-06	5.59725e-05
PTPLAD1	kgCluster9652	699.003	1007.41	390.594	0.387721	-1.36691	2.81105e-06	5.59725e-05
TMEM8B	kgCluster28835	9.01355	16.3987	1.62837	0.0992989	-3.33208	2.86756e-06	5.70088e-05
HYI	kgCluster773	72.5216	111.904	33.1392	0.29614	-1.75565	2.89301e-06	5.74621e-05
ZNF442	kgCluster14238	52.4098	19.5625	85.2571	4.35818	2.12373	2.8985e-06	5.74687e-05
C20orf112	kgCluster17842	353.449	177.972	528.926	2.97196	1.57142	2.89865e-06	5.74687e-05
ZNF462	kgCluster29340	356.655	36.3434	676.967	18.627	4.21932	2.92717e-06	5.79809e-05
EVL	kgCluster8515	878.92	1362.06	395.779	0.290573	-1.78303	2.96712e-06	5.87185e-05
TRIM21	kgCluster4141	854.227	467.273	1241.18	2.65623	1.40938	2.98743e-06	5.90666e-05
KIF22	kgCluster11005	272.873	421.587	124.159	0.294505	-1.76364	2.9924e-06	5.91108e-05
CEP135	kgCluster21200	679.021	368.572	989.47	2.6846	1.42471	2.99677e-06	5.91432e-05
IMPDH2	kgCluster19755	398.992	577.839	220.145	0.380981	-1.39221	3.00631e-06	5.92774e-05
PPA1	kgCluster3315	864.903	298.554	1431.25	4.79395	2.26121	3.01714e-06	5.94368e-05
C14orf182	kgCluster8042	27.5587	10.7869	44.3305	4.10967	2.03902	3.03095e-06	5.96547e-05
CRABP1	kgCluster9864	14.8179	0.297819	29.338	98.5097	6.62219	3.05182e-06	5.9902e-05
AKAP3	kgCluster5863	39.0658	13.1836	64.9481	4.92643	2.30054	3.05076e-06	5.9902e-05
AKT3	kgCluster2750	556.44	291.313	821.568	2.82023	1.49581	3.0498e-06	5.9902e-05
SCO2	kgCluster19338	965.6	517.309	1413.89	2.73317	1.45057	3.05682e-06	5.99457e-05
FRAT2	kgCluster3658	173.282	254.169	92.3948	0.363517	-1.4599	3.06345e-06	6.00215e-05
CHRNB1	kgCluster11854	211.733	110.582	312.885	2.82944	1.50052	3.08396e-06	6.03687e-05
GPRIN3	kgCluster21420	973.07	1428.38	517.763	0.362483	-1.46401	3.08762e-06	6.03857e-05
C5orf65	kgCluster22709	19.9182	7.12743	32.709	4.58918	2.19824	3.1018e-06	6.06083e-05
STXBP1	kgCluster29539	110.578	166.461	54.695	0.328576	-1.6057	3.11253e-06	6.07631e-05
TMEM217	kgCluster24030	62.8531	25.0357	100.67	4.02108	2.00758	3.1284e-06	6.1018e-05
SNX24	kgCluster22568	379.052	563.694	194.41	0.344885	-1.53581	3.17708e-06	6.19116e-05
WDR52	kgCluster20136	56.9031	88.0709	25.7353	0.292211	-1.77492	3.19617e-06	6.22276e-05
SLC5A3	kgCluster18458	3770.62	1741.23	5800	3.33097	1.73594	3.21711e-06	6.2579e-05
LOC100272216	kgCluster22272	179.843	270.519	89.1677	0.329617	-1.60114	3.23825e-06	6.29338e-05
5S_rRNA	kgCluster7631	10.1108	0.900146	19.3214	21.4647	4.4239	3.2443e-06	6.29948e-05
HLA-DOA	kgCluster23809	232.057	410.963	53.1498	0.12933	-2.95087	3.27942e-06	6.36195e-05
CEP78	kgCluster29055	195.126	302.023	88.2287	0.292125	-1.77534	3.30339e-06	6.40032e-05
WHSC1	kgCluster20874	1097.9	1579.11	616.687	0.390529	-1.3565	3.30511e-06	6.40032e-05
EDEM1	kgCluster19374	3280.37	1783.05	4777.68	2.67949	1.42196	3.3616e-06	6.5039e-05
HDDC3	kgCluster10080	106.466	160.836	52.0955	0.323905	-1.62636	3.37104e-06	6.51635e-05
CASP5	kgCluster5455	110.549	15.5566	205.542	13.2125	3.72383	3.40495e-06	6.57602e-05
P2RX1	kgCluster11727	108.567	185.913	31.2216	0.167937	-2.57401	3.42108e-06	6.59541e-05
CCBL1	kgCluster29602	36.7316	60.1796	13.2836	0.220733	-2.17963	3.42085e-06	6.59541e-05
TNIK	kgCluster20587	1655.99	838.454	2473.53	2.95011	1.56077	3.43809e-06	6.6223e-05
TJP2	kgCluster29005	935.841	393.302	1478.38	3.75889	1.91031	3.46372e-06	6.65981e-05
ZIK1	kgCluster15599	68.1031	104.491	31.7153	0.303523	-1.72012	3.46114e-06	6.65981e-05
ALG8	kgCluster5302	269.504	394.603	144.405	0.365951	-1.45028	3.48432e-06	6.69348e-05
TMEM54	kgCluster609	12.9607	3.07677	22.8446	7.42486	2.89236	3.52979e-06	6.77481e-05
DKFZp761E198	kgCluster5055	1381.59	779.112	1984.07	2.54658	1.34856	3.54077e-06	6.78987e-05
VTN	kgCluster12209	120.089	14.9926	225.185	15.0198	3.90879	3.56248e-06	6.82546e-05
ABCE1	kgCluster21667	721.105	1032.45	409.764	0.396886	-1.3332	3.57073e-06	6.83521e-05
UNC80	kgCluster17217	16.4464	30.756	2.13679	0.0694755	-3.84735	3.59712e-06	6.87966e-05
UNG	kgCluster6883	206.504	344.355	68.6532	0.199367	-2.3265	3.60158e-06	6.8821e-05
GPR157	kgCluster178	90.7409	40.1753	141.307	3.51725	1.81445	3.61665e-06	6.9048e-05
DAGLA	kgCluster4886	390.411	594.743	186.079	0.312872	-1.67636	3.63903e-06	6.9353e-05
ARHGAP22	kgCluster3188	355.143	531.692	178.594	0.335898	-1.5739	3.63692e-06	6.9353e-05
PARP12	kgCluster27285	1618.37	883.577	2353.15	2.66321	1.41317	3.66279e-06	6.97444e-05
RGS14	kgCluster23061	120.678	208.872	32.4838	0.15552	-2.68483	3.69628e-06	7.02597e-05
PFKP	kgCluster2855	1186.5	631.41	1741.6	2.75827	1.46376	3.69634e-06	7.02597e-05
MAOA	kgCluster30169	966.939	498.548	1435.33	2.87902	1.52558	3.703e-06	7.03245e-05
EPM2AIP1	kgCluster19575	989.425	528.423	1450.43	2.74482	1.45671	3.72375e-06	7.06079e-05
DENND5A	kgCluster4280	2149.11	1181.97	3116.26	2.63648	1.39861	3.72445e-06	7.06079e-05
FAH	kgCluster9893	497.833	742.224	253.442	0.341463	-1.5502	3.73097e-06	7.06697e-05
NETO2	kgCluster11155	295.96	415.927	175.994	0.423135	-1.24081	3.75778e-06	7.11154e-05
CD28	kgCluster17171	718.11	1401.96	34.2634	0.0244397	-5.35463	3.79551e-06	7.17667e-05
AK024243	kgCluster26083	167.546	286.306	48.7861	0.170398	-2.55302	3.82031e-06	7.21725e-05
PLXNA2	kgCluster2467	176.114	281.567	70.6613	0.250957	-1.99449	3.83317e-06	7.23524e-05
AP3M2	kgCluster27921	239.568	358.541	120.594	0.336348	-1.57197	3.87984e-06	7.31694e-05
C19orf48	kgCluster15300	190.824	290.374	91.275	0.314336	-1.66962	3.93599e-06	7.41637e-05
SMAD6	kgCluster9675	63.92	106.23	21.6099	0.203426	-2.29743	3.95973e-06	7.45463e-05
TBK1	kgCluster6582	1073.23	587.565	1558.9	2.65315	1.40771	4.05506e-06	7.62747e-05
HS3ST2	kgCluster10892	639.857	1244.9	34.8176	0.0279683	-5.16006	4.06989e-06	7.64871e-05
PKIA	kgCluster28110	24.8663	46.1096	3.62296	0.0785728	-3.66983	4.11194e-06	7.71469e-05
TRIM69	kgCluster9266	706.546	393.704	1019.39	2.58922	1.37252	4.11213e-06	7.71469e-05
RCCD1	kgCluster10081	110.139	177.187	43.0912	0.243196	-2.03981	4.13747e-06	7.75552e-05
MIR4750	kgCluster15255	16.3551	4.48525	28.2249	6.29282	2.65371	4.15358e-06	7.77898e-05
TMEM140	kgCluster27239	1107.41	622.384	1592.43	2.55859	1.35535	4.20368e-06	7.866e-05
CHTF18	kgCluster10492	138.068	223.41	52.7262	0.236007	-2.0831	4.22689e-06	7.89669e-05
LONRF3	kgCluster30691	222.978	338.645	107.311	0.316884	-1.65797	4.22737e-06	7.89669e-05
ANKLE1	kgCluster14416	66.8358	31.5595	102.112	3.23554	1.69401	4.26713e-06	7.96408e-05
TANK	kgCluster16884	1163.01	645.4	1680.63	2.60401	1.38074	4.32307e-06	8.06154e-05
SEMA4A	kgCluster1832	2484.75	1464.56	3504.94	2.39317	1.25892	4.39381e-06	8.1864e-05
CTDSPL	kgCluster19583	161.775	289.295	34.2541	0.118405	-3.07819	4.42283e-06	8.23339e-05
RALGPS1	kgCluster29529	61.0552	95.6193	26.4911	0.277048	-1.85179	4.44012e-06	8.25846e-05
SP140	kgCluster17377	627.378	166.438	1088.32	6.53889	2.70905	4.4457e-06	8.26176e-05
C1orf126	kgCluster267	43.1998	69.9111	16.4884	0.235848	-2.08407	4.47774e-06	8.31416e-05
C12orf61	kgCluster6570	24.7353	5.19054	44.2801	8.53092	3.0927	4.51276e-06	8.372e-05
RIN3	kgCluster8441	1242.2	1800.6	683.803	0.379763	-1.39683	4.52351e-06	8.38475e-05
PPP4R1L	kgCluster18168	206.694	112.045	301.343	2.68947	1.42732	4.54455e-06	8.41655e-05
EHD3	kgCluster15902	37.1656	63.0702	11.261	0.178546	-2.48563	4.55559e-06	8.42259e-05
APOBEC3D	kgCluster19152	136.698	70.1478	203.248	2.89742	1.53477	4.55271e-06	8.42259e-05
INSIG2	kgCluster16605	644.782	352.102	937.461	2.66247	1.41276	4.57066e-06	8.44325e-05
FITM2	kgCluster18006	25.0137	42.5139	7.51346	0.176729	-2.50039	4.6147e-06	8.51007e-05
IL20RB	kgCluster20367	18.7989	5.83721	31.7605	5.44105	2.44388	4.61297e-06	8.51007e-05
FFAR2	kgCluster14701	485.288	89.1808	881.395	9.88324	3.30498	4.64836e-06	8.56486e-05
CHID1	kgCluster4063	510.868	744.424	277.311	0.372518	-1.42462	4.65355e-06	8.56711e-05
TFAP4	kgCluster10671	37.8677	68.5996	7.13572	0.10402	-3.26507	4.69845e-06	8.6282e-05
AX747537	kgCluster4065	33.5729	57.3868	9.75909	0.170058	-2.5559	4.69847e-06	8.6282e-05
CELF1	kgCluster4675	3323.42	1857.68	4789.16	2.57803	1.36627	4.70145e-06	8.6282e-05
TMPO	kgCluster6782	1065.23	1518.33	612.119	0.403152	-1.3106	4.70267e-06	8.6282e-05
CH25H	kgCluster3570	12.0698	1.66978	22.4698	13.4567	3.75026	4.7069e-06	8.62864e-05
MB21D2	kgCluster20741	536.769	300.767	772.77	2.56933	1.36139	4.73043e-06	8.66444e-05
TBCD	kgCluster13329	700.376	1016.11	384.645	0.378547	-1.40145	4.74937e-06	8.69179e-05
MRTO4	kgCluster354	257.499	377.568	137.429	0.363986	-1.45804	4.78361e-06	8.74706e-05
CAMK2G	kgCluster3387	331.629	484.352	178.907	0.369375	-1.43684	4.78783e-06	8.74739e-05
SYNPO2	kgCluster21553	570.523	24.7931	1116.25	45.0228	5.49258	4.81569e-06	8.79035e-05
MRPL3	kgCluster20327	359.527	518.579	200.476	0.386587	-1.37114	4.81947e-06	8.79035e-05
AK130765	kgCluster24788	8.04601	0.567805	15.5242	27.3408	4.77298	4.87228e-06	8.87173e-05
IPO11	kgCluster22227	319.025	462.899	175.151	0.378378	-1.4021	4.86842e-06	8.87173e-05
AMPD2	kgCluster1280	572.821	819.979	325.664	0.397161	-1.3322	4.8775e-06	8.87377e-05
GPATCH4	kgCluster1852	218.001	323.673	112.328	0.347043	-1.52681	4.9562e-06	9.00938e-05
HMSD	kgCluster13753	8.85079	0.339817	17.3618	51.0916	5.67501	5.00572e-06	9.09176e-05
MCM4	kgCluster27944	730.007	1307.14	152.873	0.116953	-3.09601	5.05875e-06	9.18039e-05
ACAP3	kgCluster54	429.804	620.321	239.287	0.385748	-1.37427	5.06908e-06	9.19142e-05
CFL1P1	kgCluster3550	21.5219	3.66903	39.3747	10.7317	3.4238	5.08125e-06	9.2008e-05
APOBEC3B	kgCluster19150	1280.69	296.929	2264.46	7.62626	2.93098	5.087e-06	9.2008e-05
QTRT1	kgCluster14180	116.938	175.249	58.626	0.334529	-1.57979	5.08322e-06	9.2008e-05
CYCSP52	kgCluster1872	6.51187	0.860324	12.1634	14.1382	3.82152	5.12355e-06	9.25917e-05
SYT11	kgCluster1818	947.504	522.649	1372.36	2.62577	1.39274	5.13369e-06	9.26975e-05
MRO	kgCluster13680	366.042	690.682	41.4021	0.0599438	-4.06025	5.15351e-06	9.29005e-05
CARHSP1	kgCluster10708	218.504	320.204	116.805	0.364784	-1.45489	5.15206e-06	9.29005e-05
KIAA1797	kgCluster28670	569.468	830.513	308.424	0.371366	-1.42909	5.26764e-06	9.48789e-05
XXYLT1	kgCluster20766	174.518	252.539	96.498	0.382112	-1.38793	5.28682e-06	9.51452e-05
INPP4B	kgCluster21652	58.4966	114.564	2.42965	0.0212079	-5.55926	5.29244e-06	9.51673e-05
LOC100506229	kgCluster21879	55.0359	2.02925	108.043	53.2426	5.73451	5.37117e-06	9.65028e-05
BPGM	kgCluster27235	330.653	182.99	478.315	2.61389	1.3862	5.46548e-06	9.81158e-05
PLEKHG3	kgCluster8169	784.469	170.045	1398.89	8.2266	3.0403	5.47618e-06	9.82265e-05
PMFBP1	kgCluster11446	60.8756	110.949	10.802	0.0973596	-3.36053	5.4926e-06	9.83041e-05
APBB1	kgCluster4217	69.0268	111.998	26.0552	0.232639	-2.10384	5.49413e-06	9.83041e-05
DYRK2	kgCluster6605	551.528	793.813	309.244	0.389568	-1.36005	5.49048e-06	9.83041e-05
SLC46A1	kgCluster12211	958.527	1717.6	199.457	0.116125	-3.10625	5.5239e-06	9.87551e-05
EFHC2	kgCluster30172	7.01172	0.677458	13.346	19.7001	4.30013	5.54415e-06	9.90354e-05
C1QL3	kgCluster2959	24.6158	41.2826	7.94908	0.192553	-2.37667	5.56709e-06	9.93631e-05
WDR77	kgCluster1316	316.289	459.144	173.435	0.377736	-1.40455	5.61809e-06	0.000100191
GSDMD	kgCluster28484	888.846	490.482	1287.21	2.62438	1.39198	5.68884e-06	0.000101369
TNK2	kgCluster20780	1330.92	761.877	1899.97	2.4938	1.31834	5.70786e-06	0.000101624
SLC43A2	kgCluster11669	2388.23	1351.42	3425.04	2.5344	1.34164	5.71828e-06	0.000101726
AB075492	kgCluster24760	22.7303	7.1017	38.3588	5.40136	2.43332	5.83499e-06	0.000103717
C9orf123	kgCluster28622	162.403	240.883	83.9221	0.348394	-1.52121	5.84397e-06	0.000103792
LPAR5	kgCluster5892	81.7098	153.366	10.0539	0.0655548	-3.93115	5.86045e-06	0.000103914
PTPLA	kgCluster2969	21.0922	37.2108	4.97367	0.133662	-2.90334	5.85976e-06	0.000103914
ST6GAL1	kgCluster20709	598.641	857.79	339.492	0.395774	-1.33725	5.91109e-06	0.000104726
PPAT	kgCluster21203	153.916	226.133	81.6987	0.361286	-1.46879	5.93721e-06	0.000105103
EXOC3L4	kgCluster8665	20.077	0.180691	39.9733	221.225	7.78937	5.95423e-06	0.000105318
MEP1A	kgCluster24170	33.3292	11.7414	54.9171	4.67722	2.22565	6.00024e-06	0.000106045
C1orf170	kgCluster34	17.2592	2.78425	31.7341	11.3977	3.51067	6.18109e-06	0.000109152
G0S2	kgCluster2472	461.644	117.858	805.43	6.83393	2.77271	6.21114e-06	0.000109594
CHST13	kgCluster20255	213.43	412.564	14.2965	0.0346528	-4.85088	6.24168e-06	0.000110043
FEN1	kgCluster4891	372.292	589.376	155.208	0.263343	-1.92498	6.2888e-06	0.000110783
CRIM1	kgCluster15925	653.573	185.494	1121.65	6.04683	2.59618	6.30114e-06	0.00011091
NISCH	kgCluster19856	1608.89	2329.78	888.002	0.381153	-1.39156	6.31104e-06	0.000110994
TCF4	kgCluster13698	111.813	56.651	166.975	2.94744	1.55946	6.33131e-06	0.00011126
PRKCE	kgCluster15999	178.452	94.6282	262.276	2.77165	1.47074	6.35287e-06	0.000111458
TLE4	kgCluster29057	992.734	571.157	1414.31	2.47622	1.30814	6.34967e-06	0.000111458
RBCK1	kgCluster17552	1202.97	684.793	1721.15	2.51338	1.32963	6.40191e-06	0.000112228
CCL17	kgCluster11249	51.0194	29.023	73.0158	2.51579	1.33101	6.44168e-06	0.000112834
TIMM44	kgCluster14091	220.656	324.221	117.091	0.361145	-1.46935	6.49233e-06	0.000113629
CLIC4	kgCluster455	3238.87	1783.53	4694.22	2.63199	1.39615	6.55464e-06	0.000114627
FCAMR	kgCluster2450	418.248	4.54352	831.952	183.107	7.51655	6.56321e-06	0.000114684
ASB1	kgCluster17478	448.53	646.047	251.013	0.388536	-1.36388	6.67436e-06	0.000116532
HIST1H3E	kgCluster23377	70.4262	22.4269	118.425	5.28051	2.40068	6.69279e-06	0.000116733
AKT1S1	kgCluster15252	797.992	453.626	1142.36	2.51828	1.33244	6.69663e-06	0.000116733
ANAPC1	kgCluster16551	533.844	768.752	298.937	0.38886	-1.36268	6.8661e-06	0.000119591
DNAH11	kgCluster26236	63.5272	117.721	9.33327	0.0792829	-3.65685	6.89674e-06	0.000120028
MRPL24	kgCluster1860	177.408	260.468	94.3483	0.362227	-1.46504	6.99241e-06	0.000121595
TECR	kgCluster14314	466.532	676.472	256.591	0.379307	-1.39856	7.11414e-06	0.000123613
TFB2M	kgCluster2766	97.8173	146.534	49.1004	0.335078	-1.57743	7.15879e-06	0.000124289
TRGV3	kgCluster26399	116.775	38.8153	194.735	5.01695	2.32681	7.19308e-06	0.000124784
ALAS1	kgCluster19843	1630.32	922.532	2338.12	2.53445	1.34168	7.20577e-06	0.000124904
ATAD2	kgCluster28343	560.188	902.389	217.987	0.241566	-2.04951	7.22077e-06	0.000125064
ST8SIA4	kgCluster22484	2045.75	1166.8	2924.7	2.50661	1.32574	7.28434e-06	0.000126064
LRRC4	kgCluster27160	130.736	256.506	4.96546	0.0193581	-5.69092	7.31228e-06	0.000126446
TRAF5	kgCluster2484	836.861	454.265	1219.46	2.68446	1.42463	7.34558e-06	0.000126921
CAMK1D	kgCluster2923	178.037	262.327	93.746	0.357362	-1.48454	7.35211e-06	0.000126932
BCAT2	kgCluster15171	181.894	269.315	94.4723	0.350788	-1.51133	7.43152e-06	0.000128201
BZW2	kgCluster26213	232.739	334.85	130.628	0.39011	-1.35805	7.43772e-06	0.000128206
RCAN2	kgCluster24163	16.97	0.169908	33.7701	198.755	7.63484	7.50028e-06	0.000129182
TGFB1I1	kgCluster11101	8.45572	1.56682	15.3446	9.79347	3.29182	7.52043e-06	0.00012922
PI4K2B	kgCluster21052	1108.37	608.796	1607.95	2.64119	1.40119	7.50995e-06	0.00012922
IER3	kgCluster23688	1148.43	640.398	1656.46	2.58662	1.37107	7.51781e-06	0.00012922
LOC100130950	kgCluster11785	104.975	158.636	51.3144	0.323473	-1.62828	7.55684e-06	0.000129684
NDRG1	kgCluster28424	1772.31	976.343	2568.28	2.63051	1.39534	7.55942e-06	0.000129684
CKAP4	kgCluster6852	1259.53	648.973	1870.09	2.88162	1.52688	7.64162e-06	0.00013099
TJP1	kgCluster8964	249.06	41.7418	456.378	10.9334	3.45066	7.66377e-06	0.000131266
POGLUT1	kgCluster20172	444.28	230.195	658.364	2.86003	1.51603	7.6955e-06	0.000131706
SIGIRR	kgCluster4027	143.719	216.866	70.5726	0.32542	-1.61962	7.74837e-06	0.000132506
C6orf138	kgCluster24181	104.458	41.4387	167.478	4.04158	2.01492	7.78262e-06	0.000132777
AK022997	kgCluster6682	42.187	64.0889	20.2852	0.316517	-1.65964	7.78252e-06	0.000132777
SNX20	kgCluster11179	606.348	334.765	877.93	2.62253	1.39096	7.77217e-06	0.000132777
GNPDA1	kgCluster22784	1108.47	1612.5	604.448	0.374852	-1.41561	7.79822e-06	0.000132938
EGR1	kgCluster22695	148.481	283.38	13.582	0.0479285	-4.38297	7.81443e-06	0.00013311
TCF3	kgCluster13888	451.551	645.223	257.879	0.399674	-1.3231	7.83622e-06	0.000133376
ARID5A	kgCluster16401	1088.66	615.298	1562.03	2.53866	1.34407	7.9052e-06	0.000134444
SLC46A3	kgCluster7260	530.181	816.101	244.262	0.299303	-1.74032	7.96732e-06	0.000135394
CSTA	kgCluster20207	347.049	184.687	509.41	2.75823	1.46374	7.99554e-06	0.000135767
LGALS12	kgCluster4949	37.4726	74.4556	0.489586	0.00657554	-7.24867	8.08923e-06	0.000137251
LCLAT1	kgCluster15897	139.249	207.926	70.5718	0.339409	-1.5589	8.10703e-06	0.000137445
PRRX1	kgCluster2114	5.0532	0	10.1064	Inf	Inf	8.13585e-06	0.000137718
IL12B	kgCluster22928	20.7435	1.16344	40.3235	34.6588	5.11515	8.13545e-06	0.000137718
DCUN1D3	kgCluster10836	332.816	152.085	513.547	3.3767	1.75562	8.24173e-06	0.000139401
DNAJB6	kgCluster27549	94.8948	28.7486	161.041	5.6017	2.48586	8.37966e-06	0.000141513
CORO2A	kgCluster29280	299.27	444.485	154.055	0.346592	-1.52869	8.37886e-06	0.000141513
TTLL11	kgCluster29456	34.2115	54.9195	13.5034	0.245876	-2.024	8.42402e-06	0.000142151
MPEG1	kgCluster4811	3225.27	4718.01	1732.53	0.367217	-1.4453	8.43171e-06	0.00014217
MARS2	kgCluster17111	104.974	155.955	53.9917	0.3462	-1.53032	8.44704e-06	0.000142318
PLCXD1	kgCluster29908	165.473	244.309	86.6374	0.354622	-1.49565	8.71575e-06	0.000146731
EEFSEC	kgCluster20274	217.858	317.679	118.037	0.371562	-1.42833	8.73932e-06	0.000147013
BPHL	kgCluster23200	94.4297	141.143	47.716	0.338068	-1.56462	8.75571e-06	0.000147175
HCAR3	kgCluster7057	78.8241	6.49816	151.15	23.2604	4.53981	8.78993e-06	0.000147635
PARVG	kgCluster19255	791.757	1148.15	435.364	0.379188	-1.39901	8.80901e-06	0.000147841
HDAC5	kgCluster12667	490.688	707.526	273.85	0.387053	-1.3694	8.8432e-06	0.0001483
HLA-F-AS1	kgCluster23646	75.9413	35.6154	116.267	3.26451	1.70687	9.11527e-06	0.00015274
MMS22L	kgCluster24398	265.789	391.311	140.267	0.358453	-1.48014	9.12205e-06	0.00015274
RAB39A	kgCluster5473	493.297	272.127	714.468	2.6255	1.39259	9.27346e-06	0.000155155
B3GALT4	kgCluster23823	310.032	172.716	447.347	2.59007	1.37299	9.28376e-06	0.000155207
CNTNAP1	kgCluster12616	49.8518	12.0915	87.6121	7.24577	2.85714	9.33008e-06	0.000155861
IL1A	kgCluster16567	294.343	49.663	539.023	10.8536	3.4401	9.36374e-06	0.000156303
MUCL1	kgCluster6440	26.0548	1.04631	51.0633	48.803	5.6089	9.39972e-06	0.000156783
DNAAF1	kgCluster11526	135.224	6.88577	263.563	38.2765	5.25839	9.41283e-06	0.000156881
PLCB4	kgCluster17668	87.6333	0.894663	174.372	194.902	7.60661	9.44578e-06	0.000157188
MAPK11	kgCluster19328	79.504	28.9246	130.083	4.49733	2.16907	9.44043e-06	0.000157188
BMPR2	kgCluster17161	2232.33	1285.39	3179.26	2.47339	1.30649	9.48739e-06	0.000157759
TK2	kgCluster11290	613.27	886.716	339.823	0.383237	-1.38369	9.53274e-06	0.000158391
SMYD5	kgCluster16202	147.323	220.681	73.9646	0.335166	-1.57705	9.587e-06	0.00015914
KLF9	kgCluster29019	807.271	464.095	1150.45	2.47891	1.3097	9.5925e-06	0.00015914
ULK2	kgCluster12100	1313.89	734.15	1893.62	2.57933	1.367	9.71615e-06	0.000161068
TRPA1	kgCluster28081	55.5986	20.5617	90.6356	4.40799	2.14012	9.74763e-06	0.000161345
AP2A2	kgCluster4066	1651.89	2377.57	926.22	0.389566	-1.36006	9.74775e-06	0.000161345
RIMBP3C	kgCluster18791	23.5488	39.889	7.20857	0.180716	-2.46821	9.75983e-06	0.000161421
APBA3	kgCluster13955	294.284	164.327	424.241	2.58168	1.36831	9.84113e-06	0.000162642
REC8	kgCluster7901	63.8274	32.0115	95.6433	2.98778	1.57908	9.92771e-06	0.000163947
CTU2	kgCluster11587	77.0047	116.609	37.4009	0.320739	-1.64053	1.0009e-05	0.000165163
IRF9	kgCluster7900	962.53	545.897	1379.16	2.52642	1.33709	1.02108e-05	0.000168366
GAR1	kgCluster21515	87.0374	131.119	42.9559	0.32761	-1.60995	1.0244e-05	0.000168784
FAF1	kgCluster867	312.517	450.22	174.814	0.388286	-1.36481	1.0258e-05	0.000168887
STX17	kgCluster29296	811.756	465.729	1157.78	2.48596	1.3138	1.03419e-05	0.000170139
WDR17	kgCluster21829	73.7654	112.55	34.9806	0.3108	-1.68594	1.03574e-05	0.000170265
NFAT5	kgCluster11390	1536.07	879.485	2192.66	2.49312	1.31795	1.04066e-05	0.000170942
TOMM40	kgCluster15013	471.485	672.339	270.632	0.402523	-1.31286	1.0546e-05	0.000173102
TRIM31	kgCluster23664	31.4095	0.935454	61.8836	66.1535	6.04775	1.05689e-05	0.000173347
MLLT11	kgCluster1639	49.1589	23.0009	75.3169	3.27451	1.71128	1.05894e-05	0.00017355
ATP6V0D2	kgCluster28150	556.522	1000.92	112.121	0.112017	-3.1582	1.06477e-05	0.000174374
ZNF74	kgCluster18752	69.4335	105.716	33.1514	0.31359	-1.67305	1.07038e-05	0.000175138
UAP1L1	kgCluster29791	886.107	1277.07	495.147	0.387723	-1.3669	1.07105e-05	0.000175138
C9orf41	kgCluster29039	93.5929	140.177	47.0084	0.335349	-1.57627	1.07264e-05	0.000175266
TMC6	kgCluster13201	930.853	1345.5	516.21	0.383658	-1.38211	1.07954e-05	0.00017626
C1orf112	kgCluster2104	180.856	265.851	95.8607	0.36058	-1.47161	1.08065e-05	0.000176308
C5orf15	kgCluster22634	1165.97	647.193	1684.75	2.60317	1.38027	1.08863e-05	0.000177477
RXRA	kgCluster29703	1953.06	2819.51	1086.6	0.385386	-1.37562	1.08994e-05	0.000177555
FAM168A	kgCluster5232	584.329	327.266	841.392	2.57098	1.36232	1.108e-05	0.000180362
SAMD14	kgCluster12821	13.4574	2.76888	24.146	8.72049	3.12441	1.11056e-05	0.000180643
KIAA0408	kgCluster24565	72.1957	27.4486	116.943	4.26043	2.091	1.11882e-05	0.000181851
SIGLEC14	kgCluster15344	1042.63	588.391	1496.87	2.544	1.3471	1.12228e-05	0.000182276
AK289390	kgCluster5581	37.4892	60.0501	14.9283	0.248597	-2.00812	1.12513e-05	0.000182601
SLC44A2	kgCluster14176	749.953	394.268	1105.64	2.80428	1.48763	1.12985e-05	0.000183092
PHACTR4	kgCluster537	1702.07	984.044	2420.09	2.45933	1.29826	1.12938e-05	0.000183092
SNX29	kgCluster10742	1404.04	2035.63	772.455	0.379467	-1.39795	1.14172e-05	0.000184878
FSCN1	kgCluster26152	2153.66	1060.8	3246.53	3.06045	1.61374	1.14915e-05	0.000185943
C10orf10	kgCluster3131	215.613	62.3631	368.863	5.91476	2.56432	1.15202e-05	0.000186268
ZC3H12C	kgCluster5485	1268.44	705.259	1831.61	2.59707	1.37689	1.15608e-05	0.000186785
TMEM63C	kgCluster8320	12.2968	22.7921	1.80149	0.0790399	-3.66128	1.16725e-05	0.000188449
MMP12	kgCluster5445	155.748	24.6313	286.865	11.6463	3.5418	1.17073e-05	0.000188869
DUSP23	kgCluster1919	199.814	294.913	104.716	0.355073	-1.49381	1.17592e-05	0.000189566
MBOAT1	kgCluster23315	319.239	467.3	171.177	0.366311	-1.44886	1.17907e-05	0.000189931
WDR91	kgCluster27241	779.25	1118.29	440.209	0.393645	-1.34503	1.18461e-05	0.000190683
AK125301	kgCluster30460	357.014	197.315	516.714	2.61873	1.38887	1.19711e-05	0.000192552
ANXA9	kgCluster1632	31.3562	51.6105	11.1019	0.215109	-2.21686	1.20765e-05	0.000194102
BAZ2A	kgCluster6500	2612.94	1518.96	3706.93	2.44044	1.28714	1.22291e-05	0.00019641
WFS1	kgCluster20929	145.377	244.672	46.0822	0.188343	-2.40857	1.22535e-05	0.000196655
MRPL48	kgCluster5235	99.5417	148.573	50.5105	0.339971	-1.55652	1.23224e-05	0.000197615
MLEC	kgCluster7016	2268.91	3211.2	1326.61	0.413118	-1.27537	1.2565e-05	0.000201356
LOC641364	kgCluster21626	95.0222	41.254	148.79	3.60669	1.85068	1.26953e-05	0.000203294
PLCL1	kgCluster17113	388.983	151.864	626.102	4.12278	2.04362	1.27979e-05	0.000204786
MECR	kgCluster553	83.6054	127.073	40.1382	0.315868	-1.66261	1.2815e-05	0.000204907
SRGAP2P2	kgCluster1450	344.776	191.641	497.911	2.59814	1.37748	1.29447e-05	0.000206829
ALG3	kgCluster20667	353.5	510.359	196.64	0.385298	-1.37596	1.29569e-05	0.000206872
POLD1	kgCluster15282	624.821	883.299	366.344	0.414745	-1.26971	1.29983e-05	0.000207378
AHR	kgCluster26217	3227.89	1893.47	4562.3	2.4095	1.26873	1.30216e-05	0.000207598
PARD3	kgCluster3084	15.1303	0.918404	29.3422	31.9491	4.9977	1.3057e-05	0.000208009
PER3	kgCluster163	653.122	1011.1	295.146	0.291907	-1.77642	1.31177e-05	0.000208822
EME1	kgCluster12832	105.666	156.737	54.5958	0.348328	-1.52148	1.31795e-05	0.000209652
EBPL	kgCluster7415	47.0852	74.6964	19.4739	0.260707	-1.9395	1.33468e-05	0.000212156
JUNB	kgCluster14258	1676.3	951.464	2401.14	2.52362	1.3355	1.34301e-05	0.000213324
SLC24A3	kgCluster17732	76.1815	2.12794	150.235	70.6013	6.14162	1.34538e-05	0.000213389
FAT2	kgCluster22873	73.6756	116.338	31.0136	0.266583	-1.90734	1.34508e-05	0.000213389
BCKDHB	kgCluster24325	133.313	195.716	70.909	0.362305	-1.46472	1.35764e-05	0.000215174
PLCXD1	kgCluster31062	167.234	245.772	88.6961	0.360887	-1.47038	1.36922e-05	0.000216851
NUDT8	kgCluster5140	10.7462	19.5523	1.94007	0.0992246	-3.33316	1.38128e-05	0.000218601
ACTL6A	kgCluster20623	299.444	427.879	171.008	0.399663	-1.32314	1.39516e-05	0.000220637
LBP	kgCluster17953	68.9124	0.350599	137.474	392.112	8.61512	1.39735e-05	0.000220823
RND3	kgCluster16831	749.12	271.094	1227.15	4.52664	2.17844	1.39876e-05	0.000220883
LPCAT4	kgCluster9111	137.798	202.874	72.7218	0.358457	-1.48013	1.40451e-05	0.000221629
CUZD1	kgCluster3910	11.8498	20.9444	2.75508	0.131543	-2.9264	1.43109e-05	0.000225496
ABHD6	kgCluster19912	320.353	463.718	176.987	0.381669	-1.38961	1.43064e-05	0.000225496
CBX6	kgCluster19149	1106.57	635.774	1577.37	2.48103	1.31094	1.43514e-05	0.00022597
FAM123B	kgCluster30373	178.047	93.3533	262.741	2.81448	1.49287	1.4363e-05	0.000225988
MRPS34	kgCluster10524	279.793	400.504	159.083	0.397207	-1.33204	1.43965e-05	0.00022635
PSME2	kgCluster7898	821.709	457.249	1186.17	2.59414	1.37525	1.45112e-05	0.000227988
CD48	kgCluster1947	1242.05	710.615	1773.49	2.49572	1.31946	1.46405e-05	0.000229853
TYRO3	kgCluster9198	39.8918	71.8082	7.97526	0.111063	-3.17055	1.46974e-05	0.000230579
ZNF550	kgCluster15597	58.3131	88.063	28.5632	0.32435	-1.62438	1.47903e-05	0.000231868
CD101	kgCluster1391	118.334	227.296	9.37259	0.0412352	-4.59998	1.49075e-05	0.000233425
ZNF331	kgCluster15407	424.961	618.283	231.639	0.374649	-1.41639	1.49112e-05	0.000233425
RNF141	kgCluster4304	573.059	818.163	327.955	0.400843	-1.31889	1.50475e-05	0.000235389
SOD2	kgCluster24790	4499.27	2577.89	6420.64	2.49066	1.31653	1.51153e-05	0.000236279
MCM3	kgCluster24206	691.658	1049.47	333.845	0.318108	-1.65241	1.51463e-05	0.000236592
B4GALT1	kgCluster28747	3457.66	1982.97	4932.34	2.48734	1.31461	1.51634e-05	0.000236689
STK32B	kgCluster20920	62.8536	117.325	8.3817	0.0714397	-3.80713	1.53051e-05	0.000238729
AK097878	kgCluster4509	39.3116	14.9212	63.7021	4.26925	2.09398	1.53442e-05	0.000239167
TMEM62	kgCluster9226	602.953	327.634	878.273	2.68066	1.42259	1.53693e-05	0.000239385
DOPEY2	kgCluster18481	1566.87	2257.88	875.867	0.387915	-1.36619	1.54023e-05	0.000239726
DNAJC9	kgCluster3366	528.285	752.247	304.322	0.404551	-1.30561	1.54365e-05	0.000240086
RDH10	kgCluster28088	156.099	230.139	82.0597	0.356567	-1.48776	1.5472e-05	0.000240465
TNFRSF12A	kgCluster10610	107.301	160.374	54.2285	0.338138	-1.56432	1.56094e-05	0.000242427
MTHFD1	kgCluster8163	813.562	1151.32	475.806	0.413271	-1.27484	1.56229e-05	0.000242462
BC047373	kgCluster22387	10.0427	18.7515	1.33385	0.071133	-3.81334	1.56583e-05	0.000242838
PPP3CA	kgCluster21467	583.113	836.101	330.125	0.394838	-1.34067	1.56946e-05	0.000243227
PDZD2	kgCluster22054	29.1828	8.54687	49.8188	5.82889	2.54322	1.57344e-05	0.000243669
AK126351	kgCluster16871	8.01206	15.1731	0.85101	0.0560867	-4.1562	1.57998e-05	0.000244405
CCDC64	kgCluster6993	35.8957	66.6444	5.14708	0.0772321	-3.69466	1.58045e-05	0.000244405
C1GALT1	kgCluster26181	944.978	537.737	1352.22	2.51465	1.33036	1.58428e-05	0.000244823
STAC	kgCluster19572	84.2156	162.532	5.89919	0.0362956	-4.78406	1.58956e-05	0.000245463
ABHD14A	kgCluster19838	61.6312	97.4995	25.7629	0.264236	-1.9201	1.59846e-05	0.000246311
RBBP8	kgCluster13533	316.307	454.474	178.14	0.391969	-1.35119	1.59714e-05	0.000246311
REL	kgCluster16086	571.322	344.007	798.636	2.32157	1.2151	1.59764e-05	0.000246311
MATL2963	kgCluster5924	96.8578	16.1964	177.519	10.9604	3.45423	1.60114e-05	0.000246373
PARP15	kgCluster20214	388.402	138.051	638.753	4.62694	2.21006	1.60026e-05	0.000246373
NT5M	kgCluster12015	11.6047	22.1733	1.0362	0.0467319	-4.41945	1.60305e-05	0.000246492
MATK	kgCluster13958	392.684	680.412	104.956	0.154253	-2.69663	1.60712e-05	0.000246942
LNPEP	kgCluster22464	997.804	585.28	1410.33	2.40967	1.26883	1.61525e-05	0.000248015
EEF1E1	kgCluster23241	82.8728	122.944	42.8021	0.348145	-1.52224	1.63704e-05	0.000251182
FRMD4B	kgCluster19967	942.588	1532.46	352.717	0.230164	-2.11926	1.65539e-05	0.000253818
TGFB2	kgCluster2524	50.1243	96.0132	4.23537	0.0441124	-4.50267	1.65673e-05	0.000253844
GPR141	kgCluster26388	304.006	165.669	442.343	2.67004	1.41686	1.66026e-05	0.000254205
DYNLT1	kgCluster24778	572.208	324.738	819.679	2.52413	1.33578	1.6663e-05	0.000254949
HV303525	kgCluster3567	16.1433	3.94353	28.3431	7.18725	2.84544	1.66873e-05	0.000255141
ACHE	kgCluster26958	393.327	4.98081	781.674	156.937	7.29404	1.67593e-05	0.000256061
TLR2	kgCluster21723	2808.33	1599.39	4017.28	2.51175	1.32869	1.69018e-05	0.000258056
PSRC1	kgCluster1267	75.4149	140.914	9.91613	0.0703702	-3.82889	1.71059e-05	0.000260989
TLK2	kgCluster12970	1021.6	597.287	1445.91	2.4208	1.27548	1.72277e-05	0.000262662
UTP20	kgCluster6808	327.094	502.321	151.868	0.302332	-1.7258	1.72659e-05	0.00026306
VRK2	kgCluster16072	758.55	436.698	1080.4	2.47403	1.30686	1.73349e-05	0.000263924
AF143871	kgCluster11180	35.0395	14.5584	55.5206	3.81365	1.93117	1.76176e-05	0.00026804
LOC148696	kgCluster2464	25.3209	7.57309	43.0687	5.68707	2.50769	1.77617e-05	0.000270043
STARD9	kgCluster9220	201.308	294.589	108.027	0.366703	-1.44732	1.78042e-05	0.000270498
TIMM8A	kgCluster30552	66.0089	100.478	31.5403	0.313904	-1.67161	1.78498e-05	0.000271002
RTN4R	kgCluster18740	65.1234	115.736	14.5104	0.125375	-2.99568	1.79099e-05	0.000271724
CENPW	kgCluster24558	66.5282	109.46	23.5964	0.215571	-2.21377	1.79334e-05	0.000271889
ILVBL	kgCluster14330	410.617	587.994	233.24	0.396671	-1.33398	1.79951e-05	0.000272635
MYBPC3	kgCluster4670	33.4559	15.4715	51.4403	3.32484	1.73328	1.81517e-05	0.000274815
ACSL1	kgCluster21875	4232.79	2432.31	6033.26	2.48046	1.31061	1.82124e-05	0.000275541
PRPF3	kgCluster1616	777.56	438.432	1116.69	2.54701	1.3488	1.82606e-05	0.000276076
KCNJ2	kgCluster13063	997.307	212.478	1782.13	8.38739	3.06822	1.84006e-05	0.000277999
PAX5	kgCluster28850	183.209	5.17951	361.239	69.744	6.124	1.84278e-05	0.000278022
GCNT2	kgCluster23252	562.074	329.99	794.157	2.40661	1.267	1.84196e-05	0.000278022
RAB2B	kgCluster7794	580.128	340.101	820.154	2.4115	1.26993	1.84986e-05	0.000278896
ITGA10	kgCluster1493	42.2974	9.09564	75.4992	8.30059	3.05321	1.86355e-05	0.000280765
COQ3	kgCluster24404	45.2445	71.583	18.906	0.264112	-1.92078	1.87735e-05	0.000282472
N4BP1	kgCluster11166	1929.04	1120.19	2737.89	2.44413	1.28932	1.87749e-05	0.000282472
BC132896	kgCluster4899	12.4734	2.85817	22.0886	7.72821	2.95013	1.89353e-05	0.000284686
PTPN1	kgCluster18116	1958.55	1122.05	2795.06	2.49103	1.31674	1.90148e-05	0.000285684
FAM102A	kgCluster29559	186.317	317.342	55.2916	0.174234	-2.5209	1.92071e-05	0.000288373
ALOX5AP	kgCluster7271	341.898	578.517	105.279	0.181981	-2.45814	1.94706e-05	0.000292127
DGCR6	kgCluster18699	91.0753	137.098	45.0523	0.328613	-1.60554	1.95229e-05	0.000292708
TRMT1	kgCluster14274	225.731	321.446	130.016	0.404471	-1.30589	1.96109e-05	0.000293825
APBB1	kgCluster4216	23.0949	38.3871	7.8027	0.203264	-2.29858	1.97548e-05	0.000295776
MYD88	kgCluster19590	2022.78	1199.53	2846.04	2.37263	1.24649	1.99241e-05	0.000298105
C21orf91	kgCluster18336	236.006	137.394	334.617	2.43545	1.28419	2.01606e-05	0.000301434
SCIMP	kgCluster11786	242.591	359.05	126.131	0.351291	-1.50926	2.02189e-05	0.000301889
RANBP1	kgCluster18735	253.385	360.891	145.879	0.404219	-1.30679	2.02056e-05	0.000301889
BHLHB9	kgCluster30576	24.3482	41.5669	7.12959	0.171521	-2.54354	2.03843e-05	0.000304148
USP41	kgCluster18751	11.6158	1.54109	21.6906	14.0748	3.81505	2.04343e-05	0.000304685
OSGEP	kgCluster7741	257.747	368.488	147.005	0.398941	-1.32575	2.0644e-05	0.000307599
SDC4	kgCluster18037	797.754	459.032	1136.48	2.47581	1.3079	2.07165e-05	0.000308468
RTTN	kgCluster13766	139.36	201.966	76.7544	0.380036	-1.39579	2.07907e-05	0.00030936
TPM1	kgCluster9612	186.971	271.597	102.346	0.376829	-1.40802	2.08088e-05	0.000309417
BRCA1	kgCluster12640	465.334	748.232	182.436	0.243823	-2.03609	2.0921e-05	0.000310871
EDNRB	kgCluster7523	117.535	221.156	13.9134	0.062912	-3.99052	2.10074e-05	0.000311941
AK056817	kgCluster22138	253.929	128.029	379.829	2.96675	1.56888	2.10575e-05	0.000312471
NARS2	kgCluster5306	137.158	199.161	75.156	0.377364	-1.40597	2.11311e-05	0.000313348
EMBP1	kgCluster1422	153.204	224.105	82.3029	0.367251	-1.44516	2.13369e-05	0.000315967
LTA4H	kgCluster6758	944.277	1347.6	540.958	0.401424	-1.3168	2.133e-05	0.000315967
BAZ1A	kgCluster7969	2497.04	1447.22	3546.87	2.45082	1.29327	2.14054e-05	0.000316765
LOC100294362	kgCluster13244	552.449	316.601	788.296	2.48987	1.31607	2.14829e-05	0.000317478
ARID4B	kgCluster2700	1291.53	757.217	1825.85	2.41126	1.26979	2.14745e-05	0.000317478
RASAL1	kgCluster6943	90.542	172.38	8.70401	0.0504932	-4.30777	2.1539e-05	0.00031809
BLOC1S3	kgCluster15026	522.263	302.692	741.834	2.45079	1.29325	2.15821e-05	0.000318509
AX747537	kgCluster4064	39.9559	66.7634	13.1485	0.196942	-2.34415	2.16124e-05	0.000318739
POLR1E	kgCluster28857	103.675	152.281	55.0686	0.361624	-1.46744	2.1704e-05	0.000319655
POLE	kgCluster7150	597.972	846.374	349.57	0.413021	-1.27571	2.16949e-05	0.000319655
ABHD10	kgCluster20118	302.183	433.854	170.512	0.393018	-1.34733	2.17198e-05	0.000319669
ZCCHC24	kgCluster3483	391.257	600.538	181.977	0.303023	-1.7225	2.20766e-05	0.0003247
TTC19	kgCluster11990	345.934	491.11	200.757	0.408782	-1.2906	2.21982e-05	0.000326266
PRSS36	kgCluster11089	136.109	202.906	69.3119	0.341597	-1.54963	2.22241e-05	0.000326364
STARD4	kgCluster22512	925.257	529.737	1320.78	2.49327	1.31804	2.2235e-05	0.000326364
PHF21A	kgCluster4643	1034.28	601.674	1466.88	2.438	1.2857	2.24417e-05	0.000329175
TMEM150B	kgCluster15523	579.803	331.519	828.087	2.49785	1.32069	2.26472e-05	0.000331965
FADS3	kgCluster4895	295.232	168.194	422.271	2.51062	1.32804	2.27534e-05	0.000333296
AKR7A2	kgCluster358	315.437	449.089	181.786	0.404788	-1.30476	2.27846e-05	0.000333527
PDK3	kgCluster30088	787.978	1207.37	368.582	0.305276	-1.71181	2.29456e-05	0.000335657
MGST2	kgCluster21637	239.268	349.072	129.464	0.370881	-1.43097	2.3015e-05	0.000336444
SRGAP2	kgCluster2438	3032.39	1789.77	4275.01	2.38857	1.25615	2.31217e-05	0.000337776
SLC16A10	kgCluster24473	377.427	154.764	600.091	3.87747	1.95512	2.34641e-05	0.000342548
WASL	kgCluster27135	450.968	267.674	634.262	2.36953	1.2446	2.34915e-05	0.000342716
TMEM106C	kgCluster6240	284.928	453.524	116.332	0.256508	-1.96293	2.36197e-05	0.000344354
POLR1A	kgCluster16306	647.247	909.545	384.948	0.423232	-1.24048	2.37689e-05	0.000346296
SNX5	kgCluster17709	904.542	1272.59	536.493	0.421575	-1.24614	2.39635e-05	0.000348898
NOL6	kgCluster28755	590.854	839.976	341.732	0.406835	-1.29748	2.39965e-05	0.000349142
YEATS2	kgCluster20653	2048.91	1185.4	2912.42	2.45692	1.29685	2.40445e-05	0.000349606
PELI2	kgCluster8101	83.1179	125.268	40.9678	0.327042	-1.61245	2.41508e-05	0.000350917
LRRC25	kgCluster14458	996.024	1412.61	579.437	0.410188	-1.28564	2.44179e-05	0.000354559
PTPN7	kgCluster2352	376.157	539.977	212.336	0.393232	-1.34655	2.45422e-05	0.000356125
CD300LB	kgCluster13092	313.691	599.213	28.1695	0.0470108	-4.41086	2.45825e-05	0.000356471
C3orf26	kgCluster20048	66.086	106.687	25.4854	0.238881	-2.06564	2.46462e-05	0.000357156
ZCCHC24	kgCluster3482	377.69	578.217	177.163	0.306396	-1.70653	2.47423e-05	0.000358308
ANKRD22	kgCluster3560	178.705	16.6667	340.743	20.4445	4.35364	2.49499e-05	0.000360591
C12orf24	kgCluster6909	43.9716	66.3086	21.6345	0.326269	-1.61586	2.49257e-05	0.000360591
WDR27	kgCluster24859	65.5004	98.4006	32.6002	0.3313	-1.59379	2.49362e-05	0.000360591
TXNRD3NB	kgCluster20257	19.9342	36.0673	3.80116	0.105391	-3.24618	2.5314e-05	0.00036545
URB1	kgCluster18430	370.203	523.765	216.641	0.413623	-1.27361	2.53199e-05	0.00036545
IARS	kgCluster29183	1054.52	1497.3	611.734	0.408558	-1.29139	2.55219e-05	0.000368121
SPAG5	kgCluster12217	538.456	804.052	272.859	0.339355	-1.55913	2.59109e-05	0.000373482
SHMT2	kgCluster6521	591.502	831.482	351.522	0.422766	-1.24207	2.61049e-05	0.000376028
ASCL2	kgCluster4104	163.82	30.1334	297.507	9.873	3.30349	2.61624e-05	0.000376606
LOC100128252	kgCluster15567	23.6392	39.3174	7.96086	0.202477	-2.30417	2.62664e-05	0.000377853
CNRIP1	kgCluster16139	266.562	404.621	128.503	0.317588	-1.65477	2.6594e-05	0.000382025
LOC100506033	kgCluster15248	271.332	157.249	385.414	2.45098	1.29336	2.66094e-05	0.000382025
ARHGAP18	kgCluster24574	1246.87	1748.11	745.626	0.426534	-1.22927	2.65822e-05	0.000382025
LOC100134229	kgCluster27287	104.743	58.7678	150.719	2.56465	1.35876	2.6809e-05	0.000384636
ZNF503-AS2	kgCluster3403	15.2502	26.312	4.1884	0.159182	-2.65125	2.68717e-05	0.00038528
C12orf52	kgCluster6946	186.164	269.718	102.61	0.380435	-1.39428	2.70701e-05	0.000387868
CASP10	kgCluster17142	1065.44	641.647	1489.23	2.32096	1.21472	2.71567e-05	0.000388771
TGM2	kgCluster17947	2634.9	1648.75	3621.05	2.19624	1.13504	2.71691e-05	0.000388771
FAM213B	kgCluster110	447.946	632.758	263.133	0.415851	-1.26586	2.72262e-05	0.000389332
NOV	kgCluster28318	60.747	111.141	10.3535	0.0931565	-3.4242	2.72687e-05	0.000389424
S100A8	kgCluster1727	280.298	151.905	408.691	2.69044	1.42784	2.72641e-05	0.000389424
PDPN	kgCluster264	1077.68	480.419	1674.94	3.48642	1.80175	2.73325e-05	0.000390078
2019-09-09	kgCluster13192	2093.09	2963.12	1223.05	0.412757	-1.27663	2.75233e-05	0.000392543
LDHD	kgCluster11468	61.1474	99.6544	22.6404	0.227189	-2.13803	2.77853e-05	0.000395758
ZDHHC14	kgCluster24768	124.821	189.648	59.995	0.31635	-1.66041	2.77785e-05	0.000395758
SEC16B	kgCluster2176	197.577	296.626	98.5285	0.332164	-1.59003	2.78268e-05	0.000396088
SRC	kgCluster17937	1795.95	1091.2	2500.7	2.2917	1.19642	2.80398e-05	0.000398858
MED13	kgCluster12958	2717.08	1629.31	3804.84	2.33524	1.22357	2.85868e-05	0.000406372
NBEAL2	kgCluster19706	1006.02	1497.36	514.683	0.343728	-1.54066	2.86227e-05	0.000406616
PHF19	kgCluster29446	542.409	797.112	287.705	0.360934	-1.47019	2.88767e-05	0.000409685
C17orf70	kgCluster13273	364.208	513.808	214.609	0.417683	-1.25952	2.88667e-05	0.000409685
SELO	kgCluster19324	583.969	346.819	821.119	2.36757	1.24341	2.89069e-05	0.000409845
SLC22A4	kgCluster22606	117.749	46.0011	189.497	4.1194	2.04243	2.90496e-05	0.000411599
KBTBD7	kgCluster7342	110.38	161.01	59.7497	0.371094	-1.43014	2.91161e-05	0.000412272
HCAR2	kgCluster7056	64.3346	5.32304	123.346	23.1721	4.53432	2.92002e-05	0.000413193
ICAM1	kgCluster14159	3409.54	1985.85	4833.23	2.43383	1.28323	2.92601e-05	0.00041377
CBFA2T3	kgCluster11599	38.5994	64.8967	12.3022	0.189566	-2.39923	2.94941e-05	0.000416806
SNX29	kgCluster10743	191.89	279.652	104.128	0.372349	-1.42527	2.97226e-05	0.000419761
ACSS1	kgCluster17784	280.228	448.936	111.52	0.24841	-2.00921	3.00722e-05	0.000424254
ZNF185	kgCluster30962	520.048	741.836	298.26	0.402056	-1.31453	3.00799e-05	0.000424254
RND1	kgCluster6263	24.7449	4.44325	45.0465	10.1382	3.34173	3.01403e-05	0.000424829
CIB2	kgCluster9858	20.446	6.16432	34.7277	5.63366	2.49407	3.01717e-05	0.000424995
RAB42	kgCluster543	285.832	432.321	139.344	0.322317	-1.63345	3.05675e-05	0.00043029
GAPT	kgCluster22208	192.465	335.976	48.9541	0.145707	-2.77886	3.06871e-05	0.000431692
TRIP4	kgCluster9631	724.979	431.526	1018.43	2.36007	1.23883	3.07312e-05	0.000432034
LMBR1L	kgCluster6276	86.0002	46.3801	125.62	2.7085	1.43749	3.07734e-05	0.000432346
FDX1L	kgCluster14163	78.6208	116.314	40.9279	0.351875	-1.50687	3.0883e-05	0.000433604
PFN2	kgCluster20456	26.2723	5.55224	46.9924	8.46369	3.08129	3.11379e-05	0.000436899
CASP4	kgCluster5454	1076.66	636.502	1516.81	2.38304	1.2528	3.12784e-05	0.000438587
CALCRL	kgCluster17055	165.68	75.0607	256.299	3.41456	1.7717	3.13443e-05	0.000439226
MMP25	kgCluster10616	371.122	192.675	549.569	2.85232	1.51213	3.18275e-05	0.000445501
INPP4A	kgCluster16425	1014.22	1440.08	588.364	0.408562	-1.29137	3.18333e-05	0.000445501
BCORL1	kgCluster30758	405.292	240.3	570.283	2.37321	1.24684	3.19058e-05	0.000446227
AX747401	kgCluster29614	7.53032	13.9837	1.07698	0.0770168	-3.69868	3.20127e-05	0.000447434
KLF4	kgCluster29344	76.7639	126.113	27.4143	0.217379	-2.20172	3.22683e-05	0.000450425
RCAN1	kgCluster18466	837.717	492.491	1182.94	2.40196	1.26421	3.2254e-05	0.000450425
CMTM1	kgCluster11292	208.066	295.557	120.575	0.407958	-1.29351	3.23151e-05	0.000450787
KIF21A	kgCluster6192	41.873	69.1036	14.6424	0.211891	-2.2386	3.25044e-05	0.000453136
SMTNL1	kgCluster4770	37.988	3.767	72.2091	19.1688	4.26069	3.25641e-05	0.000453677
WDR18	kgCluster13852	178.861	257.735	99.9877	0.387948	-1.36606	3.28496e-05	0.000457359
PDHX	kgCluster4465	726.697	419.862	1033.53	2.4616	1.2996	3.34018e-05	0.000464749
TRIM38	kgCluster23351	1422.52	859.193	1985.85	2.3113	1.2087	3.35006e-05	0.000465824
RASSF4	kgCluster3130	3618.54	2074.72	5162.35	2.48822	1.31511	3.3532e-05	0.000465961
ATF3	kgCluster2498	1196.13	667.127	1725.13	2.58591	1.37068	3.38014e-05	0.000469404
RILPL2	kgCluster7074	796.756	466.083	1127.43	2.41894	1.27438	3.3952e-05	0.000471192
SELRC1	kgCluster890	216.36	310.34	122.38	0.394341	-1.34249	3.39994e-05	0.000471549
BC014138	kgCluster8519	170.923	244.398	97.4477	0.398725	-1.32653	3.4053e-05	0.00047199
BYSL	kgCluster24087	116.103	173.466	58.7394	0.338621	-1.56226	3.41908e-05	0.000473596
FGD5	kgCluster19477	161.053	298.691	23.4141	0.0783891	-3.6732	3.42201e-05	0.000473638
UNC5B	kgCluster3326	46.4933	85.2946	7.6919	0.0901804	-3.47104	3.42376e-05	0.000473638
CCR5	kgCluster19689	1670.72	1008.05	2333.38	2.31474	1.21085	3.43438e-05	0.000474805
STRN3	kgCluster7947	553.493	320.243	786.743	2.4567	1.29672	3.4671e-05	0.000479021
C10orf55	kgCluster3388	236.234	340.054	132.414	0.389392	-1.3607	3.47044e-05	0.000479177
SNHG12	kgCluster541	320.131	457.283	182.979	0.400144	-1.32141	3.4841e-05	0.000480757
CARD10	kgCluster19103	78.868	115.55	42.1863	0.365092	-1.45367	3.48762e-05	0.000480937
LAGE3	kgCluster31018	101.793	148.143	55.4436	0.374258	-1.41789	3.50682e-05	0.000483275
UBL4A	kgCluster31019	398.977	564.993	232.961	0.412325	-1.27815	3.51891e-05	0.000484633
LAT2	kgCluster26688	689.639	965.298	413.981	0.428863	-1.22141	3.53056e-05	0.00048593
FFAR3	kgCluster14698	146.83	5.67616	287.983	50.7355	5.66492	3.55374e-05	0.000488808
GCLC	kgCluster24224	945.917	1350	541.833	0.401358	-1.31704	3.58226e-05	0.000492419
OTUD7B	kgCluster1606	115.947	54.1957	177.699	3.27884	1.71318	3.58843e-05	0.000492953
MGST1	kgCluster6091	720.237	422.696	1017.78	2.40782	1.26773	3.60763e-05	0.000495277
PAQR5	kgCluster9701	85.7672	154.208	17.3269	0.112361	-3.15378	3.6107e-05	0.000495384
ABHD14B	kgCluster19836	288.531	411.498	165.563	0.402343	-1.3135	3.61954e-05	0.000496283
LRRFIP2	kgCluster19577	794.905	468.239	1121.57	2.3953	1.26021	3.62821e-05	0.000497157
LOXL2	kgCluster27782	19.7518	5.22627	34.2772	6.55864	2.7134	3.64104e-05	0.000498599
mir-223	kgCluster30382	92.6962	151.239	34.1529	0.22582	-2.14675	3.65094e-05	0.000499639
RAB12	kgCluster13418	851.171	492.645	1209.7	2.45552	1.29603	3.66681e-05	0.000501494
CTNNAL1	kgCluster29350	101.158	144.766	57.5499	0.397537	-1.33084	3.69249e-05	0.000504687
CD320	kgCluster14096	67.7614	120.788	14.7348	0.121989	-3.03517	3.7266e-05	0.000508706
C17orf89	kgCluster13264	65.7009	97.9369	33.4649	0.341699	-1.5492	3.7261e-05	0.000508706
EIF2B3	kgCluster803	208.669	298.491	118.847	0.398159	-1.32858	3.73483e-05	0.00050951
NUFIP1	kgCluster7374	84.2376	125.217	43.2582	0.345466	-1.53339	3.76749e-05	0.000513641
ZMYND19	kgCluster29822	91.2883	133.503	49.074	0.367588	-1.44384	3.78147e-05	0.000515223
TONSL	kgCluster28539	219.632	330.955	108.309	0.327262	-1.61148	3.82237e-05	0.000520467
LMBR1L	kgCluster6275	519.88	310.008	729.751	2.35398	1.2351	3.83988e-05	0.000522523
CYTH3	kgCluster26163	217.103	311.109	123.097	0.395672	-1.33762	3.84623e-05	0.00052273
FAM126A	kgCluster26245	479.517	675.57	283.464	0.419592	-1.25294	3.84398e-05	0.00052273
LTB4R2	kgCluster7914	101.905	185.412	18.3985	0.0992303	-3.33308	3.85818e-05	0.000523697
MFN1	kgCluster20621	691.012	417.194	964.83	2.31267	1.20956	3.85588e-05	0.000523697
DNMT1	kgCluster14155	1756.46	2449.31	1063.62	0.434252	-1.2034	3.87741e-05	0.000525977
SPTB	kgCluster8170	64.1995	7.87724	120.522	15.3	3.93546	3.90218e-05	0.000529005
MSH2	kgCluster16023	307.681	469.007	146.355	0.312053	-1.68014	3.91099e-05	0.000529869
LRRC38	kgCluster263	21.4172	1.96044	40.874	20.8494	4.38193	3.92507e-05	0.000531443
KCTD15	kgCluster14630	15.5047	26.3858	4.62347	0.175225	-2.51272	3.94214e-05	0.000533421
KIAA0754	kgCluster698	149.978	234.964	64.9927	0.276608	-1.85409	3.96081e-05	0.000535613
PPP1R14B	kgCluster4974	301.749	425.387	178.11	0.418701	-1.25601	4.02656e-05	0.000544164
KDM6A	kgCluster30176	1066.35	640.822	1491.88	2.32807	1.21913	4.06672e-05	0.000549249
NUAK2	kgCluster2414	274.881	126.025	423.737	3.36231	1.74945	4.09903e-05	0.000553267
TMEM236	kgCluster2974	108.265	170.74	45.7907	0.26819	-1.89867	4.11321e-05	0.000554835
KANK2	kgCluster14195	253.436	422.075	84.7971	0.200905	-2.31541	4.12653e-05	0.000556285
SELM	kgCluster18970	80.8208	33.766	127.876	3.78711	1.9211	4.19733e-05	0.000565477
CXCL11	kgCluster21323	958.77	60.8065	1856.73	30.5351	4.9324	4.22722e-05	0.000568796
DPH5	kgCluster1222	104.234	151.674	56.7944	0.37445	-1.41716	4.22698e-05	0.000568796
FANCD2	kgCluster19415	379.371	533.584	225.157	0.421971	-1.24478	4.2302e-05	0.000568844
BC035647	kgCluster23656	230.464	90.9311	369.997	4.06899	2.02467	4.24733e-05	0.000570793
SMYD3	kgCluster2764	41.7493	64.359	19.1397	0.29739	-1.74957	4.26203e-05	0.000572413
IKBIP	kgCluster6785	356.984	505.468	208.501	0.412492	-1.27756	4.27013e-05	0.000573145
FAM86A	kgCluster10697	168.233	241.268	95.1986	0.394577	-1.34162	4.28627e-05	0.000574955
SYNGR3	kgCluster10546	15.1395	4.45194	25.8271	5.80133	2.53638	4.29153e-05	0.000575304
ZGLP1	kgCluster14162	18.5728	30.0428	7.10285	0.236424	-2.08055	4.3044e-05	0.000576673
FBL	kgCluster14861	265.333	370.338	160.328	0.432924	-1.20781	4.34644e-05	0.000581945
LAS1L	kgCluster30377	274.618	384.033	165.202	0.430178	-1.217	4.3538e-05	0.00058257
LAMB1	kgCluster27062	410.455	6.18208	814.729	131.789	7.04208	4.3689e-05	0.000584228
TESC	kgCluster6973	45.6906	85.6353	5.74601	0.0670986	-3.89757	4.3987e-05	0.000586403
CD9	kgCluster5874	668.126	1091.69	244.559	0.224019	-2.15831	4.396e-05	0.000586403
ALAD	kgCluster29407	491.54	694.615	288.465	0.415287	-1.26782	4.3887e-05	0.000586403
AK125727	kgCluster8311	280.057	393.903	166.21	0.421957	-1.24483	4.39748e-05	0.000586403
GPBP1	kgCluster22204	1327.74	798.724	1856.75	2.32465	1.21701	4.39835e-05	0.000586403
ROR1	kgCluster980	7.6482	13.6613	1.63512	0.11969	-3.06262	4.41581e-05	0.000588322
ATF5	kgCluster15257	2052.12	1222.01	2882.23	2.3586	1.23793	4.45162e-05	0.000592729
RGS12	kgCluster20898	572.383	829.152	315.614	0.380647	-1.39347	4.47979e-05	0.000596113
CABLES2	kgCluster18212	159.668	228.12	91.2165	0.399861	-1.32243	4.49342e-05	0.000597558
TRAP1	kgCluster10665	464.964	648.442	281.486	0.434097	-1.20391	4.50988e-05	0.00059938
LRPPRC	kgCluster15988	1189.33	1645.84	732.818	0.445256	-1.16729	4.5248e-05	0.000600994
RAP2C	kgCluster30776	1220.4	735.332	1705.46	2.31931	1.2137	4.53397e-05	0.000601842
CA2	kgCluster28143	276.992	448.262	105.723	0.23585	-2.08406	4.53966e-05	0.000602229
LOC728855	kgCluster1576	133.336	62.7693	203.902	3.24843	1.69974	4.5503e-05	0.000603271
MGC12916	kgCluster11973	85.5349	11.4528	159.617	13.9369	3.80084	4.56472e-05	0.000604811
BAHCC1	kgCluster13268	238.638	131.469	345.807	2.63033	1.39525	4.59661e-05	0.000608664
RNF213	kgCluster13243	15211.9	9141.09	21282.7	2.32824	1.21924	4.60178e-05	0.000608976
CCDC86	kgCluster4857	191.538	290.267	92.808	0.319733	-1.64506	4.62309e-05	0.000611423
CCL3L1	kgCluster12370	277.596	76.4387	478.753	6.26323	2.64691	4.6572e-05	0.000615558
VILL	kgCluster19586	143.686	61.226	226.146	3.69363	1.88504	4.72297e-05	0.000623489
TPST2	kgCluster18900	611.651	850.296	373.007	0.438679	-1.18876	4.72069e-05	0.000623489
FAM86C1	kgCluster5199	44.5584	71.959	17.1579	0.23844	-2.0683	4.73801e-05	0.000625094
LAP3	kgCluster21026	2141.41	1255.07	3027.75	2.41241	1.27047	4.75147e-05	0.000626488
PALB2	kgCluster10903	263.549	373.816	153.283	0.410048	-1.28613	4.76552e-05	0.000627958
GSG2	kgCluster11724	82.2885	142.193	22.3844	0.157423	-2.66728	4.78162e-05	0.000629696
CA5BP1	kgCluster30025	137.411	199.275	75.5459	0.379103	-1.39934	4.8229e-05	0.000634597
SP100	kgCluster17379	2156.5	1311	3002	2.28985	1.19525	4.82469e-05	0.000634597
ISYNA1	kgCluster14460	54.9251	84.1573	25.6929	0.305296	-1.71172	4.85151e-05	0.00063735
OSGEPL1	kgCluster17071	89.4707	131.611	47.3303	0.359623	-1.47544	4.84945e-05	0.00063735
DACT3	kgCluster15085	12.422	20.1347	4.70919	0.233884	-2.09613	4.94578e-05	0.000648946
SAV1	kgCluster8053	462.383	273.514	651.252	2.38106	1.2516	4.94388e-05	0.000648946
LOC100329109	kgCluster17178	43.2613	66.5765	19.9461	0.299597	-1.7389	4.96835e-05	0.000651513
MREG	kgCluster17241	967.978	614.478	1321.48	2.15057	1.10472	4.98515e-05	0.00065332
CCDC167	kgCluster24035	81.529	120.442	42.6159	0.353829	-1.49888	5.04503e-05	0.000660768
GCC2	kgCluster16495	1212.9	743.337	1682.45	2.26338	1.17848	5.07966e-05	0.000664902
CHST9-AS1	kgCluster13557	52.2545	25.7575	78.7514	3.05742	1.61231	5.10221e-05	0.000667449
SPTBN4	kgCluster14879	21.1128	37.4896	4.73593	0.126326	-2.98477	5.13063e-05	0.000670761
PSD3	kgCluster27731	1164.65	362.833	1966.47	5.41978	2.43823	5.13384e-05	0.000670776
KIAA0564	kgCluster7352	246.517	399.452	93.5827	0.234278	-2.09371	5.14968e-05	0.000672034
ST3GAL4	kgCluster5727	326.255	157.338	495.173	3.1472	1.65407	5.14739e-05	0.000672034
ADAR	kgCluster1771	5556.12	3365.26	7746.99	2.30205	1.20292	5.16557e-05	0.000673523
SMCR8	kgCluster12037	3310.87	2062.48	4559.26	2.21057	1.14442	5.16731e-05	0.000673523
KLF5	kgCluster7498	16.9842	8.77599	25.1925	2.87061	1.52136	5.17662e-05	0.00067433
EHD1	kgCluster4998	1244.04	608.808	1879.28	3.08682	1.62612	5.19104e-05	0.000675802
RPF2	kgCluster24471	151.519	216.017	87.0216	0.402847	-1.3117	5.20692e-05	0.000677463
IL10RA	kgCluster5575	3998.44	2492.81	5504.08	2.20798	1.14273	5.28613e-05	0.000687355
LOC100506686	kgCluster9682	50.4739	82.0943	18.8536	0.229658	-2.12244	5.30693e-05	0.000689646
NRP1	kgCluster3081	3613.86	5108.97	2118.74	0.414711	-1.26982	5.3537e-05	0.000695307
ADCK2	kgCluster27294	521.713	731.562	311.865	0.426301	-1.23006	5.43475e-05	0.000705409
BHLHE41	kgCluster6138	637.486	324.688	950.285	2.92677	1.54931	5.4592e-05	0.000708159
SCAMP5	kgCluster9792	142.809	276.65	8.96731	0.0324139	-4.94724	5.47136e-05	0.000709311
C6orf174	kgCluster24566	89.617	30.536	148.698	4.8696	2.2838	5.48226e-05	0.000710299
AANAT	kgCluster13171	12.8515	3.6025	22.1004	6.13475	2.617	5.61991e-05	0.000727697
ERLIN2	kgCluster27877	686.483	956.031	416.935	0.43611	-1.19724	5.62523e-05	0.000727952
TMEM106A	kgCluster12644	1556.05	949.161	2162.93	2.27879	1.18826	5.64955e-05	0.000730661
PPM1F	kgCluster18802	696.308	974.59	418.026	0.428925	-1.2212	5.68709e-05	0.000735077
TMEM37	kgCluster16614	370.432	693.173	47.6906	0.0688005	-3.86144	5.69252e-05	0.00073534
COBLL1	kgCluster16900	89.8832	159.65	20.1166	0.126005	-2.98845	5.7329e-05	0.000740115
AK126266	kgCluster21748	322.169	455.77	188.568	0.413734	-1.27322	5.75434e-05	0.00074244
ADAMDEC1	kgCluster27792	2108.02	1287.28	2928.77	2.27517	1.18598	5.75927e-05	0.000742634
OTUB2	kgCluster8460	61.2454	100.682	21.8089	0.216612	-2.20682	5.76702e-05	0.00074319
SARM1	kgCluster12210	735.677	1232.16	239.197	0.194129	-2.36492	5.77073e-05	0.000743226
LIMA1	kgCluster6311	588.194	876.558	299.829	0.342052	-1.54771	5.79769e-05	0.000746254
GHDC	kgCluster12596	442.849	631.885	253.812	0.401674	-1.3159	5.88011e-05	0.000755964
RNF31	kgCluster7899	1872.58	1137.65	2607.51	2.29201	1.19661	5.87918e-05	0.000755964
SORT1	kgCluster1269	912.08	1344.03	480.131	0.357233	-1.48506	5.88459e-05	0.000756092
ZNF256	kgCluster15616	54.8347	82.5916	27.0778	0.327852	-1.60888	5.89272e-05	0.000756686
PTGES	kgCluster29623	315.692	22.0113	609.373	27.6846	4.79101	5.90979e-05	0.000757979
SLMO1	kgCluster13488	50.8126	87.514	14.1111	0.161244	-2.63269	5.90943e-05	0.000757979
TRAPPC2L	kgCluster11596	169.851	244.274	95.4286	0.390662	-1.35601	5.93793e-05	0.000761138
NANP	kgCluster17794	189.889	273.016	106.762	0.391047	-1.35459	6.00415e-05	0.00076917
KIR3DL2	kgCluster15498	66.9823	2.68417	131.28	48.909	5.61203	6.01544e-05	0.000770162
OLFML3	kgCluster1359	121.892	224.359	19.4262	0.0865854	-3.52973	6.06883e-05	0.000776537
PAK1IP1	kgCluster23254	173.707	247.893	99.5211	0.401467	-1.31665	6.08067e-05	0.000777593
RXRA	kgCluster29702	125.748	182.105	69.3911	0.381051	-1.39194	6.12945e-05	0.000783368
IKBKE	kgCluster2439	1116.27	680.381	1552.16	2.28132	1.18987	6.18229e-05	0.000789601
NCOA2	kgCluster28070	1368.63	853.583	1883.69	2.2068	1.14196	6.18551e-05	0.000789601
ITFG2	kgCluster5822	230.454	324.478	136.43	0.420459	-1.24996	6.21735e-05	0.000793197
CCDC15	kgCluster5700	55.0305	90.5726	19.4883	0.215168	-2.21647	6.24194e-05	0.000795734
RPGRIP1L	kgCluster11196	23.4629	38.3423	8.58339	0.223862	-2.15932	6.24711e-05	0.000795734
TICAM1	kgCluster13999	756.175	465.558	1046.79	2.24847	1.16894	6.24826e-05	0.000795734
PIK3CD	kgCluster186	1053.54	1470.01	637.065	0.433374	-1.20632	6.25716e-05	0.000796399
FBXO39	kgCluster11812	4.85524	0.198948	9.51153	47.8091	5.57921	6.28594e-05	0.000799592
AGPAT9	kgCluster21377	305.966	522.579	89.3536	0.170986	-2.54805	6.29319e-05	0.000800044
WDPCP	kgCluster16110	59.0286	88.6584	29.3988	0.331596	-1.5925	6.31677e-05	0.000802167
FAM49A	kgCluster15753	1312.95	813.286	1812.62	2.22876	1.15624	6.3173e-05	0.000802167
SSRP1	kgCluster4762	818.131	1128.25	508.013	0.450267	-1.15115	6.34382e-05	0.000805063
USP15	kgCluster6568	1956.83	1203.49	2710.18	2.25193	1.17116	6.37796e-05	0.000808921
SLFN12	kgCluster12335	466.807	236.522	697.092	2.94726	1.55937	6.38562e-05	0.000809418
C1R	kgCluster5922	357.211	6.38231	708.039	110.938	6.79361	6.39074e-05	0.000809593
UBE4B	kgCluster194	868.195	1210.29	526.097	0.434685	-1.20196	6.43394e-05	0.00081459
TRIM65	kgCluster13151	447.813	624.887	270.738	0.433259	-1.2067	6.4604e-05	0.000817461
DDIT4	kgCluster3338	889.667	487.146	1292.19	2.65257	1.40739	6.5445e-05	0.000827619
PLVAP	kgCluster14422	9.72739	1.73256	17.7222	10.2289	3.35458	6.55855e-05	0.000828911
TREX1	kgCluster19733	535.131	321.34	748.922	2.33062	1.22071	6.56528e-05	0.000829279
ADORA2B	kgCluster11988	99.1651	173.194	25.1359	0.145131	-2.78457	6.60034e-05	0.000833221
SPSB1	kgCluster182	501.866	258.787	744.945	2.8786	1.52537	6.61403e-05	0.000834463
UCHL3	kgCluster7508	148.022	213.464	82.5798	0.386857	-1.37013	6.64768e-05	0.000838219
GFRA2	kgCluster27743	54.4275	90.2548	18.6002	0.206085	-2.27869	6.68938e-05	0.000842415
BC040358	kgCluster4244	94.2266	146.578	41.8749	0.285683	-1.80751	6.68649e-05	0.000842415
CD44	kgCluster4467	5762.81	3489.96	8035.66	2.30251	1.20321	6.69263e-05	0.000842415
ETS2	kgCluster18503	1567.63	916.055	2219.2	2.42256	1.27653	6.74571e-05	0.000848603
ZNF584	kgCluster15640	64.575	94.5688	34.5812	0.365672	-1.45138	6.8248e-05	0.000857557
RASA3	kgCluster7675	606.326	816.226	396.426	0.485681	-1.04192	6.82196e-05	0.000857557
AL110181	kgCluster27136	64.5063	35.628	93.3846	2.6211	1.39017	6.85622e-05	0.000860523
IFRD2	kgCluster19800	285.816	398.74	172.892	0.433597	-1.20557	6.85636e-05	0.000860523
NHP2	kgCluster23083	200.909	283.177	118.64	0.418961	-1.25511	6.86847e-05	0.000861543
CDC42EP1	kgCluster19104	466.925	119.926	813.923	6.78686	2.76274	6.95613e-05	0.000872034
TUBGCP5	kgCluster8791	251.732	353.43	150.034	0.424509	-1.23613	6.98806e-05	0.00087553
DQ591995	kgCluster23978	193.567	273.86	113.274	0.41362	-1.27362	7.00757e-05	0.000876984
SNHG3	kgCluster539	158.496	223.687	93.3043	0.41712	-1.26147	7.00777e-05	0.000876984
FOXO3	kgCluster24445	1492.17	968.588	2015.74	2.08112	1.05736	7.0297e-05	0.00087922
ADCK1	kgCluster8336	152.312	221.849	82.7763	0.373121	-1.42229	7.05879e-05	0.000882349
SWT1	kgCluster2263	207.917	127.358	288.476	2.26509	1.17957	7.07314e-05	0.000883632
DISP1	kgCluster2568	248.05	365.389	130.712	0.357735	-1.48304	7.0932e-05	0.000885117
FNDC3B	kgCluster20592	4590.16	2774.32	6405.99	2.30903	1.20728	7.09313e-05	0.000885117
SERPINF2	kgCluster11676	29.8648	49.3175	10.4122	0.211125	-2.24383	7.11967e-05	0.000887908
BX647792	kgCluster1472	15.102	4.81662	25.3875	5.2708	2.39802	7.13475e-05	0.000889276
CAMK1G	kgCluster2469	42.4759	6.34556	78.6062	12.3876	3.63082	7.15079e-05	0.000890763
PPAN-P2RY11	kgCluster14151	612.193	869.324	355.061	0.408433	-1.29183	7.15719e-05	0.000891047
SNHG13	kgCluster21168	46.317	69.5377	23.0963	0.33214	-1.59014	7.1976e-05	0.000895564
VPS26B	kgCluster5777	619.833	863.75	375.916	0.435213	-1.2002	7.22763e-05	0.000898783
PSTPIP1	kgCluster9841	380.843	544.745	216.94	0.398242	-1.32828	7.23535e-05	0.000899227
SPOCK1	kgCluster22675	9.79127	18.6818	0.900743	0.048215	-4.37437	7.2405e-05	0.000899351
PEG3	kgCluster15576	19.0545	33.6974	4.41154	0.130916	-2.93328	7.26717e-05	0.000902146
ANKRD32	kgCluster22447	109.119	158.254	59.9842	0.379038	-1.39958	7.35853e-05	0.000912964
SP140L	kgCluster17378	703.482	429.481	977.483	2.27596	1.18648	7.39677e-05	0.000917183
ARMC2	kgCluster24447	37.9189	61.4338	14.4039	0.234462	-2.09257	7.41125e-05	0.000918451
WWOX	kgCluster11493	77.3798	114.906	39.8533	0.346834	-1.52768	7.44482e-05	0.000922084
RAB30	kgCluster5318	38.9914	20.1894	57.7935	2.86257	1.51731	7.46267e-05	0.000923767
KIAA1804	kgCluster2682	63.2601	93.7884	32.7317	0.348995	-1.51872	7.50397e-05	0.000928349
OGFR	kgCluster18224	1554.35	966.463	2142.24	2.21658	1.14834	7.53711e-05	0.000931915
IFI6	kgCluster520	1042.77	624.364	1461.18	2.34027	1.22668	7.55722e-05	0.000933869
IER5	kgCluster2228	756.609	470.842	1042.38	2.21386	1.14656	7.57064e-05	0.000934993
EPOR	kgCluster14206	106.339	165.272	47.4055	0.286833	-1.80172	7.59401e-05	0.000937345
GTF2B	kgCluster1122	458.179	276.862	639.497	2.3098	1.20777	7.63709e-05	0.000942125
AX748339	kgCluster10725	39.7896	63.8665	15.7127	0.246025	-2.02313	7.67096e-05	0.000945227
PLAGL1	kgCluster24689	671.424	413.841	929.007	2.24484	1.16661	7.67024e-05	0.000945227
BACE1	kgCluster5567	566.494	832.411	300.578	0.361093	-1.46956	7.67634e-05	0.000945351
CDCA7L	kgCluster26237	234.307	441.52	27.0934	0.0613639	-4.02647	7.68698e-05	0.000946123
SRGAP2	kgCluster1421	510.239	308.592	711.886	2.30688	1.20594	7.6943e-05	0.000946487
PLS1	kgCluster20416	16.6621	29.6684	3.65583	0.123223	-3.02066	7.71685e-05	0.000948722
TGFBR1	kgCluster29286	1777.4	2390.7	1164.1	0.486928	-1.03822	7.7347e-05	0.000950376
ZNF544	kgCluster15626	106.679	151.686	61.6711	0.406571	-1.29842	7.74538e-05	0.000951149
KCNJ5	kgCluster5741	516.834	960.705	72.9632	0.0759476	-3.71885	7.75256e-05	0.00095149
MAPRE2	kgCluster13588	759.413	1064.88	453.95	0.426294	-1.23008	7.76838e-05	0.000952892
PMVK	kgCluster1773	243.327	345.66	140.993	0.407895	-1.29373	7.78958e-05	0.000954951
TNFSF9	kgCluster14046	101.456	44.425	158.486	3.5675	1.83491	7.82686e-05	0.000958978
DARS2	kgCluster2147	505.736	702.918	308.554	0.438962	-1.18783	8.00858e-05	0.000980689
IL6	kgCluster26242	405.567	94.2102	716.924	7.60984	2.92787	8.02535e-05	0.000982187
KHK	kgCluster15833	68.5649	127.819	9.31071	0.0728429	-3.77907	8.04831e-05	0.00098444
ACE	kgCluster12979	713.311	1005.27	421.354	0.419145	-1.25448	8.06487e-05	0.000985909
PPP1R15B	kgCluster2399	1871.31	1130.58	2612.05	2.31035	1.20811	8.091e-05	0.000988545
MICB	kgCluster23714	705.618	429.562	981.674	2.28529	1.19238	8.13078e-05	0.000992845
CRY2	kgCluster4638	580.232	359.993	800.472	2.22358	1.15288	8.16019e-05	0.000995874
SLC48A1	kgCluster6237	782.013	1093.88	470.147	0.429798	-1.21827	8.19337e-05	0.00099936
APOO	kgCluster30080	235.897	131.848	339.945	2.5783	1.36642	8.22067e-05	0.00100213
IL32	kgCluster10618	346.812	149.882	543.742	3.62781	1.8591	8.26671e-05	0.0010066
FLJ39739	kgCluster1541	85.1747	46.5075	123.842	2.66283	1.41296	8.26454e-05	0.0010066
WDR5	kgCluster29700	360.798	501.199	220.397	0.43974	-1.18528	8.30469e-05	0.00101066
PHF1	kgCluster23832	609.529	379.836	839.221	2.20943	1.14367	8.32009e-05	0.00101197
C7orf23	kgCluster26791	142.121	202.215	82.0278	0.405646	-1.30171	8.43231e-05	0.00102504
ZDHHC9	kgCluster30756	673.161	190.632	1155.69	6.06241	2.59989	8.48938e-05	0.00103082
VCAN	kgCluster22414	2934.94	1147.27	4722.61	4.1164	2.04138	8.48706e-05	0.00103082
S1PR1	kgCluster1224	250.508	381.628	119.387	0.312835	-1.67653	8.51316e-05	0.00103313
SLC30A1	kgCluster2487	1196.62	734.73	1658.51	2.25731	1.1746	8.52379e-05	0.00103384
NHSL2	kgCluster30434	70.0959	126.66	13.5312	0.106831	-3.2266	8.62737e-05	0.00104582
TDP1	kgCluster8412	255.61	358.274	152.946	0.426898	-1.22804	8.64239e-05	0.00104705
BC040631	kgCluster13407	58.1841	100.572	15.7964	0.157066	-2.67056	8.68422e-05	0.00105096
SNX30	kgCluster29390	1058.79	1460.48	657.111	0.449929	-1.15223	8.6844e-05	0.00105096
ALDH7A1	kgCluster22575	194.538	348.87	40.2062	0.115247	-3.1172	8.77535e-05	0.00106138
AKAP6	kgCluster7960	81.6386	160.627	2.65053	0.0165012	-5.92129	8.84385e-05	0.00106888
P2RX1	kgCluster11728	25.0183	40.8085	9.22811	0.226132	-2.14476	8.84725e-05	0.00106888
FANCC	kgCluster29232	127.643	181.551	73.7355	0.406142	-1.29994	8.86062e-05	0.0010699
TRIM6-TRIM34	kgCluster4190	815.792	480.355	1151.23	2.39662	1.261	8.88272e-05	0.00107197
FERMT2	kgCluster8076	180.941	39.1214	322.76	8.25021	3.04443	8.90733e-05	0.00107434
TNIP2	kgCluster20886	640.997	387.353	894.642	2.30963	1.20766	8.92173e-05	0.00107547
BCAR1	kgCluster11472	140.084	223.663	56.5043	0.252631	-1.9849	8.95006e-05	0.00107829
PKD1L3	kgCluster11440	30.6888	57.3415	4.03608	0.0703867	-3.82855	9.06093e-05	0.00109104
FTSJ2	kgCluster26118	381.735	530.501	232.97	0.43915	-1.18721	9.07049e-05	0.00109158
VRK1	kgCluster8500	137.672	195.299	80.0446	0.409856	-1.28681	9.20513e-05	0.00110717
POLR1C	kgCluster24129	100.385	143.541	57.2298	0.3987	-1.32663	9.25379e-05	0.00111187
OLFML2B	kgCluster2025	2184.73	1362.73	3006.73	2.20641	1.1417	9.25442e-05	0.00111187
HIST1H2AE	kgCluster23376	8.55748	1.5776	15.5373	9.8487	3.29993	9.27817e-05	0.0011141
TNFRSF10A	kgCluster27778	269.295	164.339	374.25	2.2773	1.18732	9.28948e-05	0.00111484
CELSR1	kgCluster19298	1254.65	1911.34	597.967	0.312852	-1.67645	9.32508e-05	0.00111849
ZNF107	kgCluster26602	332.99	188.955	477.026	2.52455	1.33603	9.35576e-05	0.00112155
NKAPL	kgCluster23564	23.8395	8.73824	38.9407	4.45636	2.15587	9.38077e-05	0.00112393
ACACA	kgCluster12413	548.301	746.001	350.602	0.469975	-1.08934	9.39491e-05	0.001125
SPEM1	kgCluster11850	138.069	10.395	265.743	25.5645	4.67607	9.43335e-05	0.00112892
LOC100286793	kgCluster1444	90.0977	49.7408	130.455	2.62269	1.39105	9.44824e-05	0.00112892
ACSL4	kgCluster30641	3153.22	1895.78	4410.66	2.32656	1.2182	9.4445e-05	0.00112892
PLEKHO1	kgCluster1609	1445.5	906.972	1984.03	2.18753	1.1293	9.44848e-05	0.00112892
FGF11	kgCluster11853	148.743	11.2714	286.215	25.393	4.66636	9.56078e-05	0.0011417
SCRN2	kgCluster12758	109.416	158.437	60.3946	0.381189	-1.39142	9.59499e-05	0.00114516
DQ570835	kgCluster22310	851.972	1195.07	508.874	0.425811	-1.23171	9.64815e-05	0.00115087
FAM86EP	kgCluster20907	29.7679	46.5338	13.002	0.27941	-1.83955	9.6537e-05	0.0011509
LZTFL1	kgCluster19680	89.5077	128.776	50.239	0.390126	-1.35799	9.7823e-05	0.00116559
ATAD3B	kgCluster69	203.552	284.092	123.011	0.432998	-1.20757	9.85107e-05	0.00117313
2019-09-08	kgCluster22622	278.723	409.831	147.614	0.360183	-1.4732	9.86113e-05	0.00117369
SERPINB7	kgCluster13751	205.297	6.03943	404.554	66.9854	6.06578	9.89202e-05	0.00117672
BACE1	kgCluster5569	38.8037	58.6935	18.9139	0.322248	-1.63376	9.95305e-05	0.00118333
HIRIP3	kgCluster11019	200.626	304.553	96.698	0.317508	-1.65514	0.000100196	0.00119058
BIRC2	kgCluster5432	1259.92	778.477	1741.37	2.2369	1.1615	0.000101473	0.0012051
KLHL13	kgCluster30683	72.3095	142.9	1.71888	0.0120286	-6.37739	0.000102812	0.00122033
CES1P1	kgCluster11208	143.796	27.1761	260.416	9.58253	3.26041	0.000102907	0.00122079
LMO7	kgCluster7509	42.4509	70.4109	14.491	0.205806	-2.28064	0.000103232	0.00122397
RHEBL1	kgCluster6272	66.211	24.1613	108.261	4.48075	2.16374	0.000103523	0.00122675
BC073817	kgCluster10255	9.57382	16.944	2.20369	0.130057	-2.94278	0.000103586	0.00122682
PDE2A	kgCluster5219	17.1044	31.3852	2.82364	0.0899673	-3.47446	0.000104486	0.00123681
DCTPP1	kgCluster11048	207.753	290.782	124.725	0.428929	-1.22119	0.000104683	0.00123846
SMARCA1	kgCluster30750	43.5371	10.8721	76.2021	7.00897	2.8092	0.000104955	0.00124057
MS4A6E	kgCluster4845	23.2534	39.2129	7.29399	0.18601	-2.42655	0.000104976	0.00124057
ST6GALNAC4	kgCluster29556	156.798	222.686	90.9095	0.40824	-1.29251	0.000105094	0.00124129
CTNNBL1	kgCluster17941	968.546	601.993	1335.1	2.2178	1.14913	0.000105408	0.00124432
BLVRB	kgCluster14878	546.786	766.204	327.367	0.427258	-1.22682	0.000105607	0.00124599
CDK10	kgCluster11619	246.713	345.899	147.526	0.426499	-1.22938	0.000106153	0.00125175
DLGAP4	kgCluster17921	981.361	622.658	1340.06	2.15217	1.10579	0.000106588	0.00125619
KLRK1	kgCluster6011	78.2304	153.499	2.96223	0.0192981	-5.6954	0.000107977	0.00127187
RAB40B	kgCluster13326	20.2766	33.6119	6.94127	0.206512	-2.2757	0.000109793	0.00129257
DEPDC7	kgCluster4447	50.383	85.1305	15.6355	0.183664	-2.44486	0.000109968	0.00129321
KIAA1147	kgCluster27302	1168.15	1796.81	539.483	0.300245	-1.73579	0.000109923	0.00129321
TRAF3IP3	kgCluster2474	209.049	289.14	128.958	0.446004	-1.16487	0.000110916	0.00130365
TSHZ1	kgCluster13785	299.264	418.835	179.692	0.429028	-1.22085	0.000111434	0.00130903
PCGF5	kgCluster3594	1788.97	1118.65	2459.3	2.19845	1.13649	0.000111897	0.00131375
BOP1	kgCluster28526	237.359	340.527	134.19	0.394065	-1.3435	0.000112557	0.00132079
C10orf11	kgCluster3404	108.649	156.952	60.3458	0.384486	-1.379	0.000113441	0.00133044
FAM122C	kgCluster30806	160.883	93.5419	228.225	2.43981	1.28677	0.000114521	0.00134236
EIF2D	kgCluster2441	309.107	433.014	185.2	0.4277	-1.22533	0.000114581	0.00134236
MAZ	kgCluster11006	945.009	1291.48	598.535	0.463448	-1.10952	0.000115028	0.00134687
ALDH1A2	kgCluster9452	666.647	229.991	1103.3	4.79716	2.26218	0.000115521	0.00135191
CCRN4L	kgCluster21628	195.575	82.2228	308.926	3.75719	1.90965	0.00011605	0.00135737
LUM	kgCluster6719	6.60429	0	13.2086	Inf	Inf	0.000116648	0.00136363
LILRB2	kgCluster15481	2643.3	1637.8	3648.8	2.22787	1.15567	0.000117714	0.00137535
LIG1	kgCluster15136	369.171	564.201	174.141	0.30865	-1.69595	0.000117932	0.00137714
GRIN2D	kgCluster15148	143.235	59.4459	227.024	3.81901	1.9332	0.000118572	0.00138313
TMTC4	kgCluster7601	78.4359	112.724	44.1481	0.391648	-1.35237	0.000118557	0.00138313
LHFP	kgCluster7325	94.1242	28.3369	159.911	5.64322	2.49652	0.000119569	0.00139401
SH3YL1	kgCluster15666	138.518	195.513	81.5241	0.416976	-1.26196	0.000119789	0.00139582
CCDC75	kgCluster15931	95.0111	135.21	54.8122	0.405386	-1.30263	0.000120142	0.00139857
MDM2	kgCluster6617	2083.47	1323.29	2843.66	2.14893	1.10362	0.000120155	0.00139857
CD82	kgCluster4504	1600.4	967.62	2233.19	2.30792	1.20659	0.000120738	0.00140461
FAM198B	kgCluster21747	1961.19	2689.31	1233.07	0.458507	-1.12498	0.00012176	0.00141573
CTPS	kgCluster732	242.834	369.975	115.693	0.312705	-1.67712	0.000123031	0.00142903
GLRX5	kgCluster8484	210.167	293.136	127.197	0.433918	-1.20451	0.000123035	0.00142903
CHMP5	kgCluster28751	936.748	572.35	1301.14	2.27334	1.18481	0.000123417	0.0014327
GPR55	kgCluster17385	8.51033	16.5002	0.520492	0.0315447	-4.98646	0.000123628	0.00143438
SPIN3	kgCluster30361	68.4083	100.07	36.7461	0.367202	-1.44535	0.000123895	0.0014367
DEF6	kgCluster23991	471.049	751.29	190.809	0.253974	-1.97724	0.000124087	0.00143809
PMM2	kgCluster10707	322.325	448.759	195.892	0.436518	-1.19589	0.000124147	0.00143809
DIMT1	kgCluster22226	194.614	271.54	117.687	0.433407	-1.20621	0.000124283	0.00143889
KIF24	kgCluster28781	121.599	210.625	32.5728	0.154648	-2.69294	0.000125169	0.00144756
FKBP7	kgCluster17018	15.9299	27.2472	4.61255	0.169285	-2.56247	0.000125233	0.00144756
GPSM2	kgCluster1257	388.754	538.095	239.412	0.444926	-1.16836	0.000125121	0.00144756
CCNE1	kgCluster14599	95.4891	158.032	32.9457	0.208474	-2.26206	0.000125642	0.00145152
HIST4H4	kgCluster6075	23.3168	9.92414	36.7095	3.69902	1.88714	0.000127621	0.0014736
PACS2	kgCluster8712	800.161	1107.63	492.693	0.444818	-1.16871	0.000127848	0.00147544
PLAU	kgCluster3389	1269.75	1771.15	768.357	0.433819	-1.20484	0.000128636	0.00148374
OSMR	kgCluster22110	308.056	26.9815	589.13	21.8346	4.44854	0.000129434	0.00149143
SLC39A3	kgCluster13924	256.14	358.172	154.107	0.43026	-1.21672	0.000129441	0.00149143
FLJ39051	kgCluster5726	19.0392	5.36418	32.7143	6.09866	2.60849	0.000129607	0.00149255
C10orf2	kgCluster3718	88.3639	128.994	47.7341	0.37005	-1.43421	0.000130026	0.00149658
ZMYND10	kgCluster19806	5.27543	10.0989	0.451933	0.0447506	-4.48195	0.00013058	0.00150215
MLPH	kgCluster17461	67.2989	128.593	6.00484	0.0466965	-4.42054	0.000130794	0.00150382
TNNI2	kgCluster4090	74.1046	126.987	21.2226	0.167125	-2.581	0.00013108	0.00150631
HLA-L	kgCluster23670	292.298	179.497	405.099	2.25686	1.17432	0.000131183	0.00150669
CCDC165	kgCluster13419	13.7391	21.1914	6.28674	0.296665	-1.75309	0.000131537	0.00150995
TMEM53	kgCluster790	111.492	159.828	63.1552	0.395145	-1.33955	0.000132062	0.00151518
HES4	kgCluster35	138.342	4.98244	271.702	54.532	5.76903	0.000133234	0.00152701
LOC100132273	kgCluster19216	31.0294	48.0754	13.9834	0.290863	-1.78159	0.00013318	0.00152701
FAM53B	kgCluster3930	822.545	1142.49	502.596	0.439911	-1.18472	0.000133604	0.00153044
JPH4	kgCluster7883	15.8531	28.744	2.96223	0.103055	-3.27851	0.000133886	0.00153286
AK023457	kgCluster1323	27.717	42.0214	13.4126	0.319186	-1.64753	0.000135639	0.0015521
FAM203A	kgCluster28524	130.897	186.433	75.3599	0.404219	-1.30679	0.000136253	0.0015583
C3orf71	kgCluster19747	88.4472	49.5274	127.367	2.57164	1.36269	0.00013709	0.00156706
NAIP	kgCluster22309	2267.99	3153.13	1382.86	0.438569	-1.18912	0.000137631	0.00157241
C21orf7	kgCluster18376	102.809	34.9488	170.67	4.88343	2.28789	0.000137737	0.00157279
C9orf30-TMEFF1	kgCluster29301	583.484	296.92	870.049	2.93025	1.55102	0.000138402	0.00157954
LOC93622	kgCluster20933	67.1574	97.3987	36.9161	0.379021	-1.39965	0.000138662	0.00158168
JAM3	kgCluster5774	10.4167	17.4721	3.3613	0.192382	-2.37796	0.00013892	0.00158379
WDR34	kgCluster29593	124.136	214.653	33.6183	0.156617	-2.67469	0.000140068	0.00159501
TTC8	kgCluster8404	91.6925	133.607	49.7777	0.372567	-1.42443	0.000140126	0.00159501
DCBLD2	kgCluster20045	194.422	279.729	109.116	0.390076	-1.35817	0.000140009	0.00159501
LOC729603	kgCluster24801	196.058	118.874	273.241	2.29857	1.20074	0.000140503	0.00159847
AK125860	kgCluster27762	74.6197	42.0871	107.152	2.54597	1.34821	0.00014089	0.00160203
VEGFB	kgCluster4972	579.027	800.051	358.003	0.447475	-1.16012	0.000141068	0.00160321
ATP1B1	kgCluster2094	772.064	1172.49	371.634	0.31696	-1.65763	0.000141724	0.00160982
NSUN3	kgCluster20020	206.365	125.275	287.455	2.29459	1.19824	0.000142026	0.00161241
FAM203A	kgCluster28520	138.348	195.923	80.7737	0.412272	-1.27833	0.00014295	0.0016212
ZNF230	kgCluster14986	154.104	94.6514	213.556	2.25624	1.17392	0.00014295	0.0016212
AF339817	kgCluster7581	17.5946	30.181	5.00825	0.165941	-2.59126	0.000143941	0.00163158
ZNF229	kgCluster15000	26.1043	41.9397	10.2688	0.244846	-2.03005	0.000144068	0.00163217
ATG4C	kgCluster970	409.512	572.413	246.611	0.430827	-1.21482	0.000145739	0.00165023
LYN	kgCluster27974	3189.09	1967.44	4410.74	2.24187	1.1647	0.00014602	0.00165255
PON2	kgCluster26846	277.977	407.168	148.785	0.365414	-1.4524	0.000146363	0.00165557
CA12	kgCluster9618	159.927	13.4523	306.402	22.777	4.50951	0.000148017	0.0016734
MARVELD1	kgCluster3672	314.883	467.298	162.469	0.347678	-1.52418	0.000149685	0.00169137
P2RY10	kgCluster30493	12.2338	20.067	4.40063	0.219297	-2.18905	0.000149864	0.00169251
PGAM5	kgCluster7152	400.514	552.132	248.896	0.450791	-1.14947	0.000150097	0.00169338
LRP10	kgCluster7850	2894.67	1843.24	3946.11	2.14086	1.09819	0.000150043	0.00169338
CD83	kgCluster23284	1735.76	1087.33	2384.19	2.1927	1.13271	0.000150368	0.00169556
C16orf5	kgCluster10678	265.49	373.644	157.336	0.421085	-1.24782	0.000151942	0.00171242
OPRL1	kgCluster18283	112.837	171.862	53.8133	0.31312	-1.67521	0.000152332	0.00171592
PUSL1	kgCluster55	94.9004	134.239	55.5617	0.413901	-1.27264	0.000152598	0.00171802
LOC645676	kgCluster1811	54.742	28.9758	80.5081	2.77846	1.47428	0.000153073	0.00172247
PDE8A	kgCluster10010	948.294	578.713	1317.88	2.27725	1.18729	0.000154858	0.00174164
NEK8	kgCluster12230	167.53	100.901	234.159	2.32067	1.21454	0.000155189	0.00174446
ZNF93	kgCluster14534	113.451	162.1	64.8024	0.399769	-1.32276	0.000155704	0.00174781
ANKRD36	kgCluster16413	210.664	299.026	122.302	0.409	-1.28983	0.000155632	0.00174781
DBF4B	kgCluster12686	251.737	152.476	350.998	2.30199	1.20288	0.000155729	0.00174781
ZNF219	kgCluster7783	290.204	410.083	170.325	0.415342	-1.26763	0.000155904	0.00174887
GPR82	kgCluster30163	161.63	253.476	69.7841	0.275308	-1.86088	0.000156334	0.00175279
PAM	kgCluster22488	1417.69	764.478	2070.91	2.70892	1.43772	0.000156445	0.00175313
C17orf79	kgCluster12296	213.232	297.943	128.521	0.431361	-1.21303	0.000156717	0.00175436
CLDN12	kgCluster26811	391.385	238.433	544.338	2.28298	1.19092	0.000156684	0.00175436
INPP5A	kgCluster3982	87.7088	127.101	48.3166	0.380144	-1.39538	0.000157424	0.00176045
SSBP3	kgCluster919	320.344	437.982	202.706	0.462818	-1.11148	0.000157346	0.00176045
ANKMY1	kgCluster17502	103.609	147.013	60.2051	0.409522	-1.28799	0.000157765	0.00176336
EBNA1BP2	kgCluster763	238.572	331.858	145.286	0.437797	-1.19167	0.000158828	0.00177431
B3GNTL1	kgCluster13331	86.4082	122.606	50.2105	0.409528	-1.28797	0.000160357	0.0017903
ANTXR2	kgCluster21351	2415.6	1519.77	3311.43	2.1789	1.1236	0.000160424	0.0017903
HAUS8	kgCluster14409	145.729	203.719	87.7404	0.430694	-1.21526	0.000161116	0.0017971
TARP	kgCluster26393	146.335	9.57	283.101	29.5821	4.88665	0.000161459	0.00179713
PIGZ	kgCluster20808	27.7423	42.4129	13.0717	0.308201	-1.69806	0.000161534	0.00179713
ATP8B1	kgCluster13712	113.974	168.244	59.7052	0.354873	-1.49462	0.000161464	0.00179713
LRRK2	kgCluster6196	1459.63	819.624	2099.64	2.56171	1.35711	0.000161419	0.00179713
ARHGAP26	kgCluster22791	1675.79	2295.94	1055.64	0.459788	-1.12096	0.000161363	0.00179713
MCL1	kgCluster1622	3602.39	2241.25	4963.54	2.21463	1.14707	0.000161937	0.00180069
PVRL3	kgCluster20112	46.927	6.52203	87.3319	13.3903	3.74312	0.000163973	0.00181959
INSL3	kgCluster14436	8.23929	1.57333	14.9053	9.47371	3.24393	0.000163929	0.00181959
RBM38	kgCluster18160	246.108	349.328	142.888	0.409036	-1.2897	0.000163929	0.00181959
ZBTB9	kgCluster23835	109.411	155.041	63.7796	0.411371	-1.28149	0.000163806	0.00181959
DICER1	kgCluster8477	4638.09	2878	6398.19	2.22314	1.1526	0.000164327	0.00182258
ERI3	kgCluster788	201.949	280.014	123.884	0.44242	-1.17651	0.000164827	0.00182702
FNIP2	kgCluster21758	2995.65	1885.07	4106.22	2.17828	1.12319	0.000164896	0.00182702
RAB43	kgCluster20295	1452.25	931.056	1973.44	2.11957	1.08377	0.000165099	0.00182834
SRSF12	kgCluster24368	45.4274	14.9784	75.8765	5.06573	2.34077	0.000165417	0.00183092
PPP2R3A	kgCluster20361	268.301	148.1	388.501	2.62323	1.39135	0.000166069	0.00183705
SLC7A6	kgCluster11365	690.7	948.546	432.854	0.456334	-1.13184	0.000166141	0.00183705
LOC100506668	kgCluster7011	63.6055	92.6315	34.5795	0.373302	-1.42159	0.000166409	0.00183908
GGA2	kgCluster10899	1909.71	2625.81	1193.61	0.454566	-1.13744	0.000166981	0.00184446
MGMT	kgCluster3963	131.542	189.862	73.2216	0.385656	-1.37461	0.000168134	0.00185625
AK128708	kgCluster16855	94.4691	53.4418	135.496	2.5354	1.34221	0.000168775	0.00186238
AK127609	kgCluster20781	63.0666	34.2144	91.9188	2.68655	1.42576	0.000169251	0.00186667
TTC27	kgCluster15914	167.173	237.463	96.8839	0.407996	-1.29337	0.000170104	0.00187417
CNTROB	kgCluster11891	434.419	599.772	269.066	0.448615	-1.15645	0.000170094	0.00187417
LOC728554	kgCluster23077	164.213	230.677	97.7493	0.423749	-1.23872	0.000170193	0.0018742
ZBTB2	kgCluster24742	478.996	295.466	662.525	2.24231	1.16498	0.000170694	0.00187876
LINC00341	kgCluster8481	186.418	269.15	103.686	0.385236	-1.37619	0.000172952	0.00190264
BBS12	kgCluster21589	107.373	63.7945	150.952	2.36623	1.24259	0.000173274	0.00190523
TUBGCP4	kgCluster9235	182.107	255.01	109.204	0.428235	-1.22353	0.000173986	0.00191208
CLU	kgCluster27814	322.691	38.21	607.172	15.8904	3.99008	0.000174181	0.00191325
ELF4	kgCluster30759	1530.13	963.491	2096.77	2.17623	1.12183	0.000174786	0.00191892
BCL2L13	kgCluster18683	1060.28	674.079	1446.48	2.14587	1.10156	0.000175518	0.00192598
PTAFR	kgCluster531	3202.99	2039.36	4366.61	2.14117	1.0984	0.000176709	0.00193807
NUDT6	kgCluster21591	29.6643	50.2506	9.07806	0.180656	-2.46869	0.000177008	0.00193951
GPR157	kgCluster179	25.61	13.1409	38.0791	2.89776	1.53494	0.00017702	0.00193951
GRIPAP1	kgCluster30245	1162.86	736.645	1589.08	2.15718	1.10915	0.00017835	0.0019531
CAMKMT	kgCluster15992	27.5012	41.569	13.4334	0.32316	-1.62968	0.000178883	0.00195795
RDH13	kgCluster15506	92.6968	133.387	52.0067	0.389894	-1.35885	0.000179423	0.00196286
ZNF433	kgCluster14227	48.9859	24.2339	73.7378	3.04276	1.60538	0.000182115	0.00199131
FAM156A	kgCluster30317	164.665	231.034	98.296	0.425461	-1.2329	0.000182236	0.00199163
FAM8A1	kgCluster23297	535.429	347.498	723.359	2.08162	1.05771	0.000182452	0.00199298
RYR1	kgCluster14812	30.0042	51.8085	8.19982	0.158272	-2.65953	0.000182769	0.00199443
NHSL1	kgCluster24652	177.783	250.754	104.812	0.417986	-1.25847	0.000182691	0.00199443
SBSN	kgCluster14704	6.44826	0.496767	12.3997	24.9609	4.6416	0.00018339	0.00199901
MACROD1	kgCluster4964	12.6967	22.7001	2.69327	0.118646	-3.07527	0.000183466	0.00199901
SPIRE1	kgCluster13489	769.676	1068.38	470.976	0.440833	-1.18169	0.000183296	0.00199901
BCL2L11	kgCluster16545	548.116	305.85	790.381	2.58421	1.36972	0.000183653	0.00200004
SLC26A9	kgCluster2433	8.54572	0.180691	16.9108	93.5894	6.54827	0.000185474	0.00201886
GPHN	kgCluster8188	132.39	184.034	80.7449	0.438749	-1.18853	0.000186786	0.00203212
FAM179B	kgCluster8014	649.49	409.672	889.307	2.17078	1.11821	0.000187767	0.00204176
CCDC125	kgCluster22263	203.468	282.338	124.599	0.441311	-1.18013	0.000188264	0.00204614
NSUN7	kgCluster21111	56.8888	5.51331	108.264	19.6369	4.29549	0.000188525	0.00204795
GCNT3	kgCluster9469	8.21828	14.906	1.53057	0.102681	-3.28375	0.000188831	0.00204951
YRDC	kgCluster676	365.783	224.594	506.973	2.25728	1.17459	0.000188858	0.00204951
PHYH	kgCluster2932	239.403	337.602	141.205	0.418259	-1.25753	0.000189601	0.00205654
ANPEP	kgCluster10056	4331.06	2788.78	5873.34	2.10606	1.07455	0.000190445	0.00206467
RAD51C	kgCluster12908	112.46	160.171	64.7499	0.404255	-1.30666	0.000192937	0.00209063
BCL11A	kgCluster16080	141.906	69.4726	214.34	3.08525	1.62539	0.000195788	0.00212047
[truncated: 2,763 more rows]
